# Supplementary material
Source: publisher figshare collection journal article supplement (https://acs.figshare.com/ndownloader/files/11357933)

# Supporting Information

## Cp\*Co(III)-Catalyzed C-H Alkylation with Maleimides using Weakly Coordinating Carbonyl Directing Groups

Rajib Mandal, Balakumar Emayavaramban and Basker Sundararaju\*  
Fine chemical Laboratory, Department of Chemistry, Indian Institute of Technology Kanpur,  
Kanpur, India.

Email: [basker@iitk.ac.in](mailto:basker@iitk.ac.in)

### CONTENT

|   |                                                                                         |         |
|---|-----------------------------------------------------------------------------------------|---------|
| 1 | General Information.                                                                    | S2      |
| 2 | General Procedure for preparation ketones.                                              | S2-S5   |
| 3 | General Procedure for synthesis of <i>N</i> -aryl/ <i>N</i> -alkyl maleimides.          | S5      |
| 4 | General catalytic procedures for coupling of activated olefins with ketones and esters. | S6-S7   |
| 5 | Procedure for the gram scale synthesis of <b>3nb</b> .                                  | S7-S8   |
| 6 | Analytical data of products.                                                            | S8-S24  |
| 7 | Competitive experiment with <i>p</i> -substituted ketones.                              | S25     |
| 8 | H/D exchange experiments.                                                               | S25-S28 |

**1. General:** Unless otherwise mentioned, all reactions were carried out under argon atmosphere. 1,2-Dichloroethane (1,2-DCE) was dried using calcium hydride under the established protocol. Reagent grade 2,2,2-trifluoroethanol (TFE) was used as such from the commercial sources.  $^1\text{H}$  and  $^{13}\text{C}$  NMR were recorded on JEOL (400 MHz) and JEOL (500 MHz) using  $\text{CDCl}_3$  as a solvent. Chemical shifts ( $\delta$ ) are given in ppm relative to TMS, coupling constants ( $J$ ) in Hz. The solvent signals used as references and the chemicals shifts converted to TMS scale ( $\text{CDCl}_3$ :  $\delta_{\text{C}} = 77.0$  ppm; residual  $\text{CHCl}_3$  in  $\text{CDCl}_3$ :  $\delta_{\text{H}} = 7.26$  ppm). All the reactions were monitored by analytical thin layer chromatography (TLC) using commercial aluminium sheets precoated with silica gel. Column chromatography was conducted on silica gel (Merck, 200-400 mesh). EI-MS/ESI-MS was recorded on a Waters Micromass Quattro Micro triplequadrupole mass spectrometer. LC-MS was recorded on an Agilent technologies 6120 Quadrupole LC/MS. Unless otherwise mentioned, all other chemicals were received and used as such from the commercial sources.

## 2. Experimental Section:

### 2.1. General Procedure (A) for the preparation Ketone:<sup>1</sup>

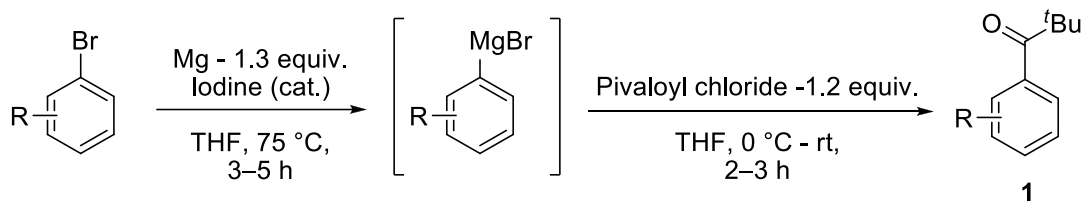

Comercially available magnesium was washed with 1(N) HCl followed by washing with distilled water and acetone. Magnesium was dried in oven for overnight. Magnesium (1.3 equiv.) was charged in an oven dried two necked round bottom flask equipped with a reflux condenser and a glass vacuum adapter. The flask was heated under vacuum two to three times to activate magnesium. After cooling to room temperature, a pinch of iodine followed by dry THF (4.0 mL per mmol) were added to the flask. The resultant suspension was heated to 75 °C, subsequently aryl bromide in dry THF (5.0 mL) solution was added

<sup>1</sup> Mo, F.; Trzepakowski, L. J.; Dong, G. *Angew. Chem. Int. Ed.* **2012**, *51*, 13075 –13079.

dropwise to the reaction flask. Disappearance of iodine colour was observed and slowly reaction mixture turned into the light black solution. The reaction was continued for additional 3-5 h and monitored by TLC. After that the reaction mixture was cooled down to room temperature. The corresponding Grignard solution was transferred to a solution of pivaloyl chloride (1.3 equiv.) in dry THF (4 mL per mmol) via cannula at 0 °C. After additional stirring for 2-3 hours at ambient temperature, the reaction was quenched by saturated NH<sub>4</sub>Cl aqueous solution (20 mL), extracted with ethyl acetate (15 mL×3), combined organic layers were dried over Na<sub>2</sub>SO<sub>4</sub>. The solvent was removed under reduced pressure, and the residue was purified by flash column chromatography on silica gel (Hex/EA= 99/1 to 90/10) to give aryl *tert*-butyl ketone **1** in good yield (70 - 85 %).

Aryl ketone **1a**, **1b**, **1c**, **1d**, **1e**, **1f**, **1g**, **1h**, **1i** and **1j** were prepared according to the general procedure (A).

Ethyl benzoate **4a**, **4b**, **4c** and **4d** were prepared according to the literature procedure.<sup>2</sup>

## 2.2. Procedure (B) for the synthesis of ketone (**1u**):<sup>3</sup>

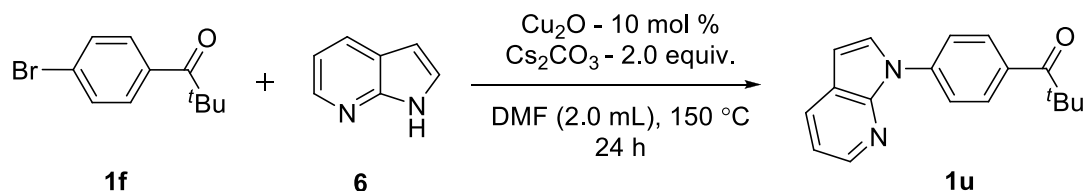

Ketone **1u** was prepared from its bromo derivative **1f** using modified reported procedure mentioned below. An oven-dried Schlenk tube was charged with 1*H*-pyrrolo[2,3-*b*]pyridine **6** (0.200 g, 1.69 mmol, 1.0 equiv.), Cu<sub>2</sub>O (0.024 g, 0.169 mmol) and Cs<sub>2</sub>CO<sub>3</sub> (1.10 g, 3.38 mmol, 2.0 equiv.) under argon atmosphere. 1-(4-Bromophenyl)-2,2-dimethylpropan-1-one **1f** (0.611 g, 2.53 mmol, 1.5 equiv.), followed by dry DMF (2.0 mL) were added to the Schlenk tube. The Schlenk tube was sealed under argon, and then sealed tube was placed to a preheated oil bath at 150 °C (oil bath temperature). After stirring at this temperature for 24 h, the heterogeneous mixture was cooled to room temperature and diluted with

<sup>2</sup> Sun, L.; Xing, H.; Liang, Z.; Yu, J.; Xu, R. *Chem. Commun.*, **2013**, 49, 11155-11157.

<sup>3</sup> Correa, A.; Bolm, C. *Adv. Synth. Catal.* **2007**, 349, 2673-2676.

dichloromethane. The resulting solution was directly filtered through a pad of silica gel and concentrated to yield the product, which was purified by silica gel chromatography (5:95 ethyl acetate/hexane) to yield (0.282 g, 1.01 mmol, 60 % yield) 1-(4-(1*H*-pyrrolo[2,3-*b*]pyridin-1-yl)phenyl)-2,2-dimethylpropan-1-one **1u** as white solid.

**1-(4-(1*H*-Pyrrolo[2,3-*b*]pyridin-1-yl)phenyl)-2,2-dimethylpropan-1-one (**1u**):**

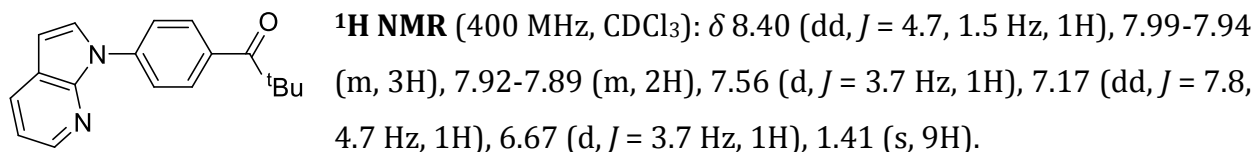

**<sup>13</sup>C NMR** (100 MHz, CDCl<sub>3</sub>): δ 207.3, 147.4, 143.7, 140.7, 135.1, 129.7, 129.2, 127.1, 122.4, 121.9, 117.1, 102.6, 44.1, 28.1.

**HRMS** calculated for C<sub>18</sub>H<sub>19</sub>N<sub>2</sub>O is [M+H]<sup>+</sup> : 279.1497; found: 279.1490.

**2.3. Procedure (C) for the synthesis of ketone (**1k**):<sup>4</sup>**

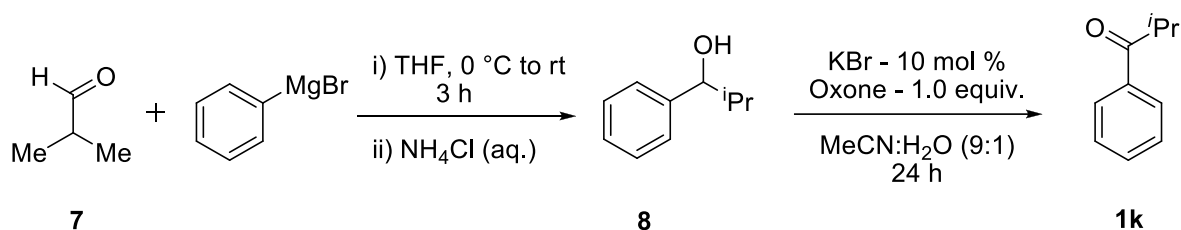

The phenyl magnesium bromide solution was prepared according to the procedure **A**. Grignard solution was added to a solution of isobutyraldehyde **7** (1.3 equiv.) in dry THF (4 mL per mmol) via cannula at 0 °C. After additional stirring for 3 h at ambient temperature, the reaction was quenched by saturated NH<sub>4</sub>Cl aqueous solution (20 mL), extracted with ethyl acetate (15 mL × 3) and the combined organic layers were dried over Na<sub>2</sub>SO<sub>4</sub>. The solvent was removed under reduced pressure and the residue was purified by flash column chromatography on silica gel (hexane/ethyl acetate= 85/15) to give secondary alcohol **8**.

<sup>4</sup> Slagbrand, T.; Kivijärvi, T.; Adolfss, H. *ChemCatChem* **2015**, 7, 3445 –3449.

Alcohol **8** was subjected for oxidation according to the literature procedure to furnish 2-methyl-1-phenylpropan-1-one (**1k**) in good yield.<sup>5</sup>

#### 2.4. General Procedure (D) for the synthesis of N-aryl/N-alkyl maleimide derivatives:<sup>6</sup>

N-Aryl/Alkyl maleimides **2** were prepared using the modified reported procedure mentioned below from the corresponding primary amine.

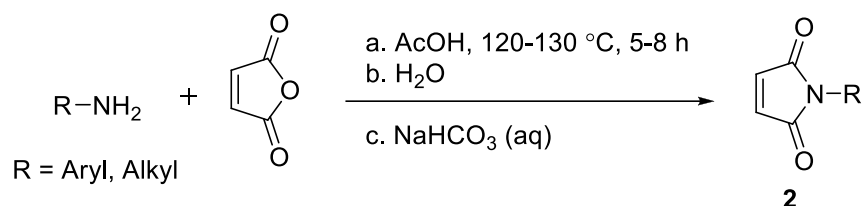

Maleic anhydride (2.0 equiv.) and primary amine (1.0 equiv.) were stirred in acetic acid (1.5 ml per mmol of amine) until maleic anhydride dissolved completely. The reaction mixture was refluxed for 6-8 h at 125 °C (oil bath temperature). After completion of the reaction, the reaction mixture was then allowed to cool down to room temperature and the whole reaction mixture was transferred to a 500 mL beaker. Saturated sodium bicarbonate aqueous solution was added to the beaker containing reaction mixture until effervescence stop. The aqueous mixture was extracted with ethyl acetate (3x20 mL). The organic layer was further washed with 1(N) HCl (2x50 mL) and brine solution (30 mL) respectively. The excess solvent was removed under reduced pressure and the residue was purified by flash column chromatography using ethyl acetate/ hexane (10/90-60/40) to get highly pure maleimide **2** in good yield (60-90 %).

<sup>5</sup> Moriyama, K.; Takemura, M.; Togo, H. *J. Org. Chem.* **2014**, 79, 6094–6104.

<sup>6</sup> Deshmukha, G. B.; Patila, N. S.; Gaikwada, V. B.; Bholeb, A. D.; Patil, S. V. *J. Chem. Pharm. Res.* **2014**, 6, 393.

## 2.5. General catalytic procedure (E) of coupling of maleimide (2) with ketone (1):

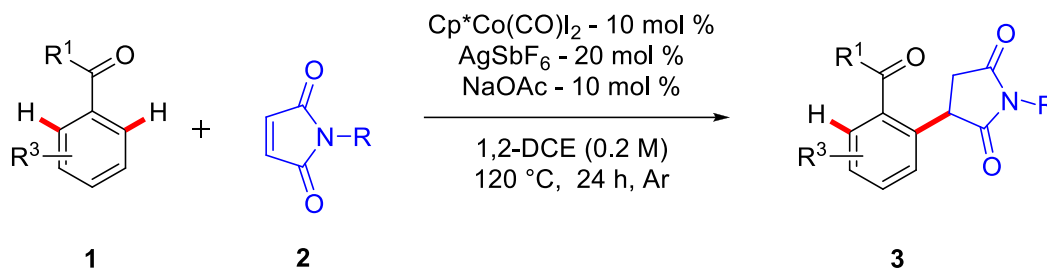

An oven-dried Schlenk tube equipped with a magnetic stir bar was charged with Cp\*Co(CO)I<sub>2</sub> (9.5 mg, 0.02 mmol, 10 mol %), AgSbF<sub>6</sub> (14.0 mg, 0.04 mmol, 20 mol %), NaOAc (1.6 mg, 0.02 mmol, 10 mol %) under argon atmosphere. Small amount of 1,2-DCE (0.2 mL) was added to the Schlenk tube and stirred for few minutes. Ketone **1** (0.2 mmol, 1.0 equiv.), maleimide **2** (0.3 mmol, 1.5 equiv.) followed by 0.8 mL 1,2-DCE were successively added to the Schlenk. The closed tube was placed to a pre-heated oil bath at 120 °C for 24 h. After completion of the reaction, the reaction mixture was then allowed to cool down to room temperature. The crude mixture was purified by flash column chromatography (ethyl acetate/hexane) on silica gel afforded **3**.

## 2.6. General catalytic procedure (F) of coupling of maleimide (2b) with ester (4):

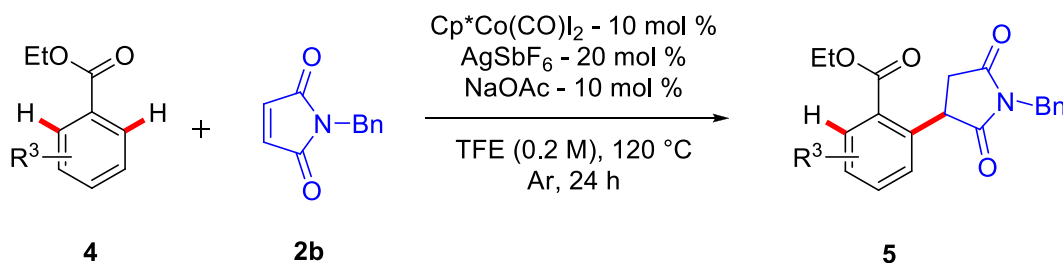

An oven-dried Schlenk tube equipped with a magnetic stir bar was charged with Cp\*Co(CO)I<sub>2</sub> (9.5 mg, 0.02 mmol, 10 mol %), AgSbF<sub>6</sub> (14.0 mg, 0.04 mmol, 20 mol %), NaOAc (1.6 mg, 0.02 mmol, 10 mol %) under argon atmosphere. Small amount of 2,2,2-trifluoroethanol (TFE) (0.2 mL) was added to the Schlenk tube and stirred for few minutes. Ester **4** (0.2 mmol, 1.0

equiv.), 1-benzyl-1*H*-pyrrole-2,5-dione **2b** (56.1 mg, 0.3 mmol, 1.5 equiv.) followed by 0.8 mL TFE were successively added to the Schlenk tube. The closed Schlenk tube was placed to a pre-heated oil bath at 120 °C for 24 h. After completion of the reaction, the reaction mixture was then allowed to cool down to room temperature. The crude mixture was purified by flash column chromatography (ethyl acetate/hexane) on silica gel afforded **5**.

## 2.7. General catalytic procedure (G) of coupling of ethyl acrylate (**6**) with ketone (**1**):

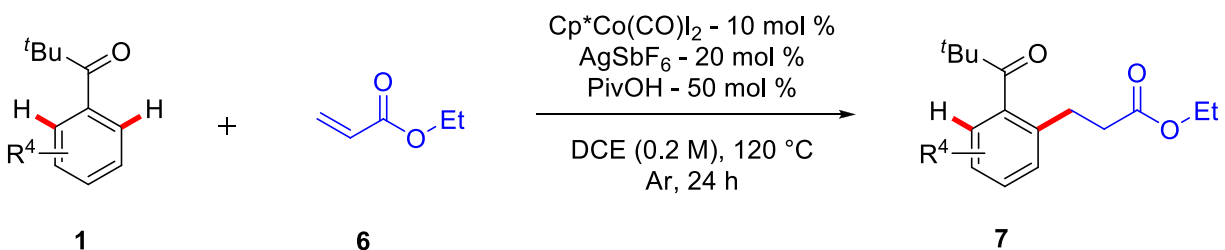

An oven-dried Schlenk tube equipped with a magnetic stir bar was charged with Cp\*Co(CO)I<sub>2</sub> (9.5 mg, 0.02 mmol, 10 mol %), AgSbF<sub>6</sub> (14.0 mg, 0.04 mmol, 20 mol %), PivOH (0.010 mg, 0.1 mmol, 50 mol %) under argon atmosphere. Small amount of 1,2-DCE (0.2 mL) was added to the Schlenk tube and stirred for few minutes. Ketone **1** (0.2 mmol, 1.0 equiv.), ethyl but-3-enoate **6** (0.4 mmol, 2.0 equiv.) followed by 0.8 mL 1,2-DCE were successively added to the Schlenk tube. The closed Schlenk tube was placed to a pre-heated oil bath at 120 °C for 24 h. After completion of the reaction, the reaction mixture was then allowed to cool down to room temperature. The crude mixture was purified by flash column chromatography (ethyl acetate/hexane) on silica gel afforded **7**.

## 2.8. Procedure for synthesis of the product (**3nb**) in (> 1.0 mmol scale):

An oven-dried Schlenk tube equipped with a magnetic stir bar was charged with Cp\*Co(CO)I<sub>2</sub> (197 mg, 0.416 mmol, 10 mol %), AgSbF<sub>6</sub> (286 mg, 0.832 mmol, 20 mol %), NaOAc (34 mg, 0.416 mmol, 10 mol %) under argon atmosphere. Small amount of 1,2-DCE (1.0 mL) was added to the Schlenk tube and stirred for few minutes. Acetophenone **1n** (0.5 g, 4.16 mmol, 1.0 equiv.), 1-benzyl-1*H*-pyrrole-2,5-dione **2b** (0.945 g, 6.24 mmol, 1.2 equiv.) followed by 9 mL 1,2-DCE were successively added to the Schlenk. The closed tube was placed to a pre-

heated oil bath at 120 °C for 36 h. After completion of the reaction, the reaction mixture was then allowed to cool down to room temperature. The crude mixture was purified by flash column chromatography (ethyl acetate/hexane) on silica gel afforded 0.752 g of **3nb** in 59 % yield.

### 1-Phenyl-3-(2-pivaloylphenyl)pyrrolidine-2,5-dione (**3aa**):

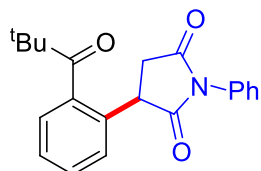

Compound **3aa** was prepared according to the general procedure **E** and was purified by flash column chromatography (EtOAc : hexane = 10 : 90) afforded 62.4 mg of **3aa** in 93 % yield as yellow solid.

**<sup>1</sup>H NMR** (500 MHz, CDCl<sub>3</sub>): δ 7.58 (dd, *J* = 7.7, 1.2 Hz, 1H), 7.50-7.34 (m, 7H), 7.28 (dd, *J* = 7.7, 1.1 Hz, 1H), 4.15 (dd, *J* = 9.7, 6.0 Hz, 1H), 3.32 (dd, *J* = 18.3, 9.7 Hz, 1H), 3.02 (dd, *J* = 18.3, 6.0 Hz, 1H), 1.31 (s, 9H).

**<sup>13</sup>C NMR** (125 MHz, CDCl<sub>3</sub>): δ 213.3, 176.9, 175.0, 139.1, 135.6, 132.0, 130.5, 130.0, 129.1, 128.6, 126.9, 126.79, 126.75, 45.1, 44.7, 38.7, 28.1.

**HRMS** calculated for C<sub>21</sub>H<sub>22</sub>NO<sub>3</sub> is [M+H]<sup>+</sup> : 336.1600; found: 336.1601.

### 1-Benzyl-3-(5-methyl-2-pivaloylphenyl)pyrrolidine-2,5-dione (**3bb**):

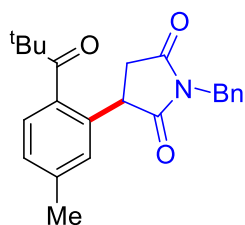

Compound **3bb** was prepared according to the general procedure **E** and was purified by flash column chromatography (EtOAc : hexane = 7 : 93) afforded 68.3 mg of **3bb** in 94 % yield as colourless liquid.

**<sup>1</sup>H NMR** (400 MHz, CDCl<sub>3</sub>): δ 7.45-7.42 (m, 2H), 7.37 (d, *J* = 7.9 Hz, 1H), 7.35-7.28 (m, 3H), 7.09 (d, *J* = 7.9 Hz, 1H), 6.77 (brs, 1H), 4.75 (d, *J* = 14.1 Hz, 1H), 4.70 (d, *J* = 14.1 Hz, 1H), 3.89 (dd, *J* = 9.5, 5.2 Hz, 1H), 3.15 (dd, *J* = 18.4, 9.6 Hz, 1H), 2.76 (dd, *J* = 18.4, 5.2 Hz, 1H), 2.27 (s, 3H), 1.29 (s, 9H).

**<sup>13</sup>C NMR** (100 MHz, CDCl<sub>3</sub>): δ 213.1, 177.7, 175.7, 140.5, 136.8, 135.84, 135.83, 129.3, 128.7, 128.5, 127.8, 127.3, 126.2, 44.7, 44.3, 42.5, 38.7, 27.8, 21.1.

**HRMS** calculated for C<sub>23</sub>H<sub>26</sub>NO<sub>3</sub> is [M+H]<sup>+</sup> : 364.1913; found: 364.1911.

### 1-Benzyl-3-(5-*tert*-butyl-2-pivaloylphenyl)pyrrolidine-2,5-dione (**3cb**):

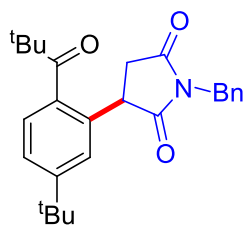

Compound **3cb** was prepared according to the general procedure **E** and was purified by flash column chromatography (EtOAc : hexane = 3 : 97) afforded 77.0 mg of **3cb** in 95 % yield as colourless liquid.

**<sup>1</sup>H NMR** (400 MHz, CDCl<sub>3</sub>): δ 7.45-7.42 (m, 3H), 7.34-7.28 (m, 4H), 6.94 (d, *J* = 1.8 Hz, 1H), 4.77 (d, *J* = 14.2 Hz, 1H), 4.73 (d, *J* = 14.2 Hz, 1H), 3.93 (dd, *J* = 9.6, 5.3 Hz, 1H), 3.17 (dd, *J* = 18.4, 9.5 Hz, 1H), 2.79 (dd, *J* = 18.5, 5.3 Hz, 1H), 1.30 (s, 9H), 1.20 (s, 9H).

**<sup>13</sup>C NMR** (100 MHz, CDCl<sub>3</sub>): δ 213.2, 177.8, 175.8, 153.7, 136.6, 135.9, 135.7, 128.7, 128.6, 127.8, 126.2, 125.7, 123.8, 44.8, 44.7, 42.5, 38.8, 34.7, 30.9, 27.9.

**HRMS** calculated for C<sub>26</sub>H<sub>31</sub>NNaO<sub>3</sub> is [M+Na]<sup>+</sup> : 428.2202; found: 428.2206.

### 1-Benzyl-3-(5-methoxy-2-pivaloylphenyl)pyrrolidine-2,5-dione (**3db**):

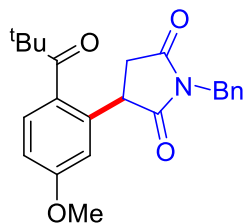

Compound **3db** was prepared according to the general procedure **E** and the was purified by flash column chromatography (EtOAc : hexane = 20 : 80) afforded 65.3 mg of **3db** in 86 % yield as colourless liquid.

**<sup>1</sup>H NMR** (400 MHz, CDCl<sub>3</sub>): δ 7.51 (d, *J* = 8.6 Hz, 1H), 7.44-7.42 (m, 2H), 7.33-7.26 (m, 3H), 6.79 (dd, *J* = 8.6, 2.5 Hz, 1H), 6.50 (d, *J* = 2.5 Hz, 1H), 4.74 (d, *J* = 14.1 Hz, 1H), 4.69 (d, *J* = 14.1 Hz, 1H), 3.96 (dd, *J* = 9.4, 5.5 Hz, 1H), 3.69 (s, 3H), 3.16 (dd, *J* = 18.3, 9.6 Hz, 1H), 2.79 (dd, *J* = 18.3, 5.5 Hz, 1H), 1.29 (s, 9H).

**<sup>13</sup>C NMR** (100 MHz, CDCl<sub>3</sub>): δ 212.0, 177.5, 175.6, 160.7, 138.2, 135.8, 131.5, 128.7, 128.57, 128.50, 127.8, 114.7, 111.8, 55.1, 44.8, 44.6, 42.5, 38.5, 28.1.

**HRMS** calculated for C<sub>23</sub>H<sub>26</sub>NO<sub>4</sub> is [M+H]<sup>+</sup> : 380.1862; found: 380.1858.

### 1-Benzyl-3-(5-chloro-2-pivaloylphenyl)pyrrolidine-2,5-dione (**3eb**):

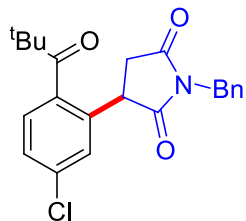

Compound **3eb** was prepared according to the general procedure **E** and was purified by flash column chromatography (EtOAc : hexane=7:83) afforded 68.3 mg of **3eb** in 89 % yield as colourless liquid.

**<sup>1</sup>H NMR** (400 MHz, CDCl<sub>3</sub>): δ 7.43-7.41 (m, 3H), 7.35-7.27 (m, 4H), 7.02 (d, *J* = 1.9 Hz, 1H), 4.74 (d, *J* = 14.1 Hz, 1H), 4.70 (d, *J* = 14.0 Hz, 1H), 3.89 (dd, *J* = 9.6, 5.5 Hz, 1H), 3.14 (dd, *J* = 18.4, 9.6 Hz, 1H), 2.76 (dd, *J* = 18.4, 5.5 Hz, 1H), 1.29 (s, 9H).

**<sup>13</sup>C NMR** (100 MHz, CDCl<sub>3</sub>): δ 212.2, 176.8, 175.1, 137.8, 137.6, 136.0, 135.5, 129.1, 128.7, 128.6, 127.9, 127.5, 126.9, 44.7, 44.2, 42.6, 38.3, 27.8.

**HRMS** calculated for C<sub>22</sub>H<sub>23</sub>ClNO<sub>3</sub> is [M+H]<sup>+</sup> : 384.1366; found: 384.1367.

**1-Benzyl-3-(5-bromo-2-pivaloylphenyl)pyrrolidine-2,5-dione (3fb):**

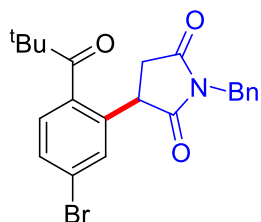

Compound **3fb** was prepared according to the general procedure **E** and the was purified by flash column chromatography (EtOAc : hexane = 7 : 83) afforded 68.5 mg of **3fb** in 80 % yield as dence colourless liquid.

**<sup>1</sup>H NMR** (400 MHz, CDCl<sub>3</sub>): δ 7.45 (dd, *J* = 8.4, 1.8 Hz, 1H), 7.44-7.41 (m, 2H), 7.35-7.29 (m, 4H), 7.17 (d, *J* = 1.8 Hz, 1H), 4.75 (d, *J* = 14.1Hz, 1H), 4.69 (d, *J* = 14.1 Hz, 1H), 3.87 (dd, *J* = 9.5, 5.5 Hz, 1H), 3.15 (dd, *J* = 18.4, 9.6 Hz, 1H), 2.77 (dd, *J* = 18.4, 5.5 Hz, 1H), 1.30 (s, 9H).

**<sup>13</sup>C NMR** (100 MHz, CDCl<sub>3</sub>): δ 212.4, 176.8, 175.1, 138.4, 137.8, 135.6, 132.0, 129.9, 128.8, 128.7, 128.0, 127.6, 124.3, 44.8, 44.2, 42.7, 38.4, 27.8.

**HRMS** calculated for C<sub>22</sub>H<sub>23</sub>BrNO<sub>3</sub> is [M+H]<sup>+</sup> : 428.0861; found: 428.0860.

**1-Benzyl-3-(4-methyl-2-pivaloylphenyl)pyrrolidine-2,5-dione (3gb):**

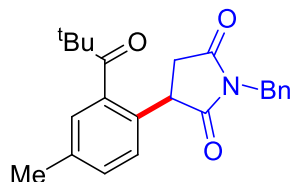

Compound **3gb** was prepared according to the general procedure **E** and the was purified by flash column chromatography (EtOAc : hexane = 8 : 92) afforded 65.4 mg of **3gb** in 90 % yield as colourless liquid.

**<sup>1</sup>H NMR** (500 MHz, CDCl<sub>3</sub>): δ 7.43-7.41 (m, 2H), 7.34-7.27 (m, 3H), 7.22 (brs, 1H), 7.15 (dd, *J* = 8.0, 0.9 Hz, 1H), 6.89 (d, *J* = 7.9 Hz, 1H), 4.74 (d, *J* = 14.1 Hz, 1H), 4.69 (d, *J* = 14.1 Hz, 1H), 3.86 (dd, *J* = 9.5, 5.4 Hz, 1H), 3.14 (dd, *J* = 18.4, 9.5 Hz, 1H), 2.73 (dd, *J* = 18.4, 5.4 Hz, 1H), 2.35 (s, 3H), 1.30 (s, 9H).

**<sup>13</sup>C NMR** (125 MHz, CDCl<sub>3</sub>): δ 213.5, 177.6, 175.6, 139.9, 136.6, 135.8, 132.4, 130.9, 128.7, 128.5, 128.3, 127.8, 126.4, 44.7, 43.9, 42.5, 38.7, 27.8, 21.0.

**HRMS** calculated for C<sub>23</sub>H<sub>26</sub>NO<sub>3</sub> is [M+H]<sup>+</sup> : 364.1913; found: 364.1913.

### 1-Benzyl-3-(4-methyl-2-pivaloylphenyl)pyrrolidine-2,5-dione (**3hb**):

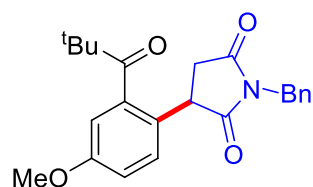

Compound **3hb** and **3hb'** were prepared according to the general procedure **E** and was purified by flash column chromatography (EtOAc : hexane = 20 : 80) afforded 37.2 mg of **3hb** (49 % yield) as white solid and 23.5 mg of **3hb'** (31 % yield) as red liquid.

**<sup>1</sup>H NMR** (400 MHz, CDCl<sub>3</sub>):  $\delta$  7.43-7.40 (m, 2H), 7.34-7.28 (m, 3H), 6.94 (d,  $J$  = 2.6 Hz, 1H), 6.93 (d,  $J$  = 8.6 Hz, 1H), 6.87 (dd,  $J$  = 8.6, 2.6 Hz, 1H), 4.74 (d,  $J$  = 14.1 Hz, 1H), 4.68 (d,  $J$  = 14.1 Hz, 1H), 3.83 (dd,  $J$  = 9.6, 5.4 Hz, 1H), 3.80 (s, 3H), 3.13 (dd,  $J$  = 18.4, 9.5 Hz, 1H), 2.72 (dd,  $J$  = 18.4, 5.4 Hz, 1H), 1.30 (s, 9H).

**<sup>13</sup>C NMR** (100 MHz, CDCl<sub>3</sub>):  $\delta$  213.0, 177.8, 175.7, 157.8, 140.9, 135.8, 129.6, 128.8, 128.6, 127.9, 127.3, 115.0, 112.4, 55.4, 44.8, 43.6, 42.6, 38.8, 27.8.

**HRMS** calculated for C<sub>23</sub>H<sub>26</sub>NO<sub>4</sub> is [M+H]<sup>+</sup> : 380.1862; found: 380.1859.

### 1-Benzyl-3-(2-methoxy-6-pivaloylphenyl)pyrrolidine-2,5-dione (**3hb'**):

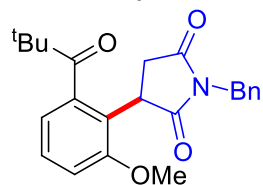

**<sup>1</sup>H NMR** (400 MHz, CDCl<sub>3</sub>):  $\delta$  7.51 (d,  $J$  = 6.9 Hz, 2H), 7.34-7.22 (m, 3H), 7.23 (d,  $J$  = 8.0 Hz, 1H), 6.58 (d,  $J$  = 7.5 Hz, 1H), 6.78 (d,  $J$  = 8.2 Hz, 1H), 4.73 (d,  $J$  = 13.8 Hz, 1H), 4.66 (d,  $J$  = 13.8 Hz, 1H), 3.56 (dd,  $J$  = 8.6, 5.6 Hz, 1H), 3.13 (s, 3H), 3.00 (dd,  $J$  = 8.6, 5.6 Hz, 1H), 2.67 (dd,  $J$  = 18.2, 5.4 Hz, 1H), 1.29 (s, 9H).

**<sup>13</sup>C NMR** (100 MHz, CDCl<sub>3</sub>):  $\delta$  213.8, 178.1, 176.1, 157.1, 143.1, 136.1,

129.6, 128.5, 128.2, 127.8, 122.5, 117.2, 111.4, 54.8, 45.1, 42.5, 41.3, 36.4, 27.3.

**HRMS** calculated for C<sub>23</sub>H<sub>25</sub>NNaO<sub>4</sub> is [M+Na]<sup>+</sup> : 402.1681; found: 402.1687.

### 1-Benzyl-3-(3-pivaloylnaphthalen-2-yl)pyrrolidine-2,5-dione (**3ib**):

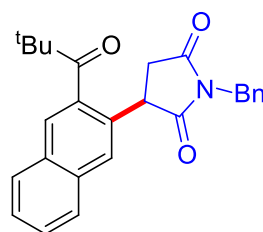

Compound **3ib** was prepared according to the general procedure **E** and was purified by flash column chromatography (EtOAc : hexane = 20 : 80) afforded 70.3 mg of **3ib** in 88 % yield as white solid.

**<sup>1</sup>H NMR** (400 MHz, CDCl<sub>3</sub>):  $\delta$  7.99 (s, 1H), 7.85-7.82 (m, 1H), 7.67-7.65 (m, 1H), 7.55-7.48 (m, 5H), 7.38-7.30 (m, 3H), 4.80 (d,  $J$  = 14.0 Hz, 1H), 4.76 (d,  $J$  = 14.0 Hz, 1H), 4.12 (dd,  $J$  = 9.5, 5.3 Hz, 1H), 3.22 (dd,  $J$  = 18.4, 9.6 Hz, 1H), 2.89 (dd,  $J$  = 18.4, 5.3 Hz, 1H), 1.40 (s, 9H).

**<sup>13</sup>C NMR** (100 MHz, CDCl<sub>3</sub>): δ 213.0, 177.6, 175.7, 136.6, 135.8, 133.3, 133.1, 130.9, 128.8, 128.5, 128.3, 128.0, 127.9, 127.7, 127.4, 127.0, 126.3, 44.9, 44.6, 42.5, 38.8, 28.1.

**HRMS** calculated for C<sub>26</sub>H<sub>26</sub>NO<sub>3</sub> is [M+H]<sup>+</sup> : 400.1913; found: 400.1913.

**1-Benzyl-3-(2-pivaloylthiophen-3-yl)pyrrolidine-2,5-dione (3jb):**

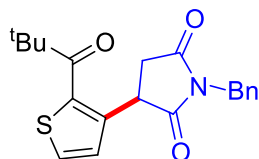

Compound **3jb** was prepared according to the general procedure **E** and was purified by flash column chromatography (EtOAc : hexane = 20 : 80) afforded 60.4 mg of **3jb** in 85 % yield as colourless liquid.

**<sup>1</sup>H NMR** (400 MHz, CDCl<sub>3</sub>): δ 7.46-7.43 (m, 3H), 7.34-7.27 (m, 3H), 6.86 (d, *J* = 5.2 Hz, 1H), 4.77 (d, *J* = 14.2 Hz, 1H), 4.73 (d, *J* = 14.2 Hz, 1H), 4.47 (dd, *J* = 9.5, 6.1 Hz, 1H), 3.18 (dd, *J* = 18.0, 9.4 Hz, 1H), 2.68 (dd, *J* = 17.9, 6.1 Hz, 1H), 1.33 (s, 9H).

**<sup>13</sup>C NMR** (100 MHz, CDCl<sub>3</sub>): δ 200.5, 170.0, 175.7, 143.6, 135.8, 132.8, 129.3, 129.0, 128.7, 128.5, 127.7, 44.5, 42.5, 42.0, 36.9, 27.7.

**HRMS** calculated for C<sub>20</sub>H<sub>22</sub>NO<sub>3</sub>S is [M+H]<sup>+</sup> : 356.1320; found: 356.1322.

**1-Benzyl-3-(2-isobutyrylphenyl)pyrrolidine-2,5-dione (3kb):**

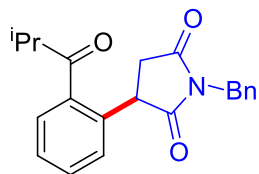

Compound **3kb** was prepared according to the general procedure **E** and was purified by flash column chromatography (EtOAc : hexane = 20 : 80) afforded 43.6 mg of **3kb** in 65 % yield as colourless liquid.

**<sup>1</sup>H NMR** (500 MHz, CDCl<sub>3</sub>): δ 7.77 (dd, *J* = 7.7, 1.1 Hz, 1H), 7.47-7.39 (m, 4H), 7.34-7.27 (m, 3H), 7.15 (dd, *J* = 7.5, 1.1 Hz, 1H), 4.77 (d, *J* = 14.1 Hz, 1H), 4.72 (d, *J* = 14.1 Hz, 1H), 4.26 (dd, *J* = 9.4, 6.1 Hz, 1H), 3.45 (sep, *J* = 6.9 Hz, 1H), 3.19 (dd, *J* = 18.1, 9.5 Hz, 1H), 2.79 (dd, *J* = 18.1, 6.1 Hz, 1H), 1.13 (t, *J* = 6.7 Hz, 6H).

**<sup>13</sup>C NMR** (125 MHz, CDCl<sub>3</sub>): δ 207.8, 177.6, 175.8, 137.1, 136.5, 135.9, 132.2, 131.2, 129.2, 128.8, 128.5, 127.9, 127.7, 45.7, 42.5, 38.2, 37.4, 18.8, 18.6.

**HRMS** calculated for C<sub>21</sub>H<sub>22</sub>NO<sub>3</sub> is [M+H]<sup>+</sup> : 336.1600; found: 336.1600.

### 3-(2-Benzoylphenyl)-1-benzylpyrrolidine-2,5-dione (**3lb**):

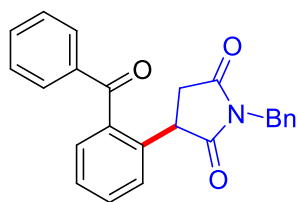

Compound **3lb** was prepared according to the general procedure **E** and the reaction was continued for 36 h. The crude reaction mixture was purified by flash column chromatography (EtOAc : hexane = 40 : 60) afforded 45.0 mg of **3lb** in 61 % yield as white solid. The NMR

data of **3lb** is in accordance with the literature.<sup>7</sup>

**<sup>1</sup>H NMR** (400 MHz, CDCl<sub>3</sub>):  $\delta$  7.79-7.77 (m, 2H), 7.62-7.58 (m, 1H), 7.51-7.34 (m, 7H), 7.31-7.26 (m, 3H), 7.21 (d,  $J$  = 7.5 Hz, 1H), 4.72 (d,  $J$  = 14.1 Hz, 1H), 4.65 (d,  $J$  = 14.1 Hz, 1H), 4.31 (dd,  $J$  = 9.5, 5.8 Hz, 1H), 3.23 (dd,  $J$  = 18.3, 9.6 Hz, 1H), 2.90 (dd,  $J$  = 18.3, 5.9 Hz, 1H).

**<sup>13</sup>C NMR** (100 MHz, CDCl<sub>3</sub>):  $\delta$  197.8, 177.6, 175.6, 137.6, 137.3, 137.2, 135.7, 133.2, 131.6, 130.6, 130.3, 129.6, 128.7, 128.5, 128.3, 127.7, 127.0, 44.5, 42.5, 38.3.

### 1-Benzyl-3-(2-propionylphenyl)pyrrolidine-2,5-dione (**3mb**):

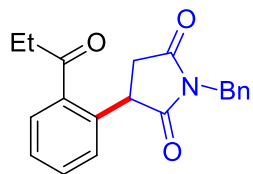

Compound **3mb** was prepared according to the general procedure **E** and was purified by flash column chromatography (EtOAc : hexane = 35 : 75) afforded 54.0 mg of **3mb** in 84 % yield as colourless liquid. The NMR data of **3mb** is in accordance with the literature.<sup>7</sup>

**<sup>1</sup>H NMR** (400 MHz, CDCl<sub>3</sub>):  $\delta$  7.80 (dd,  $J$  = 7.6, 1.4 Hz, 1H), 7.48-7.38 (m, 4H), 7.35-7.27 (m, 3H), 7.16 (dd,  $J$  = 7.6, 1.2 Hz, 1H), 4.78 (d,  $J$  = 14.1 Hz, 1H), 4.71 (d,  $J$  = 14.1 Hz, 1H), 4.34 (dd,  $J$  = 9.4, 6.2 Hz, 1H), 3.19 (dd,  $J$  = 18.0, 9.4 Hz, 1H), 2.95 (q,  $J$  = 7.2 Hz, 2H), 2.80 (dd,  $J$  = 18.0, 6.2 Hz, 1H), 1.11 (t,  $J$  = 7.2 Hz, 3H).

**<sup>13</sup>C NMR** (100 MHz, CDCl<sub>3</sub>):  $\delta$  204.3, 177.7, 175.8, 136.6, 136.2, 135.9, 132.2, 131.3, 129.6, 128.7, 128.4, 128.0, 127.7, 44.8, 42.5, 37.8, 33.8, 8.12.

### 3-(2-Acetylphenyl)-1-benzylpyrrolidine-2,5-dione (**3nb**):

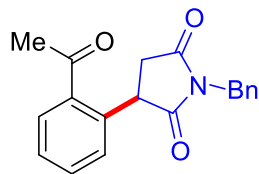

Compound **3nb** was prepared according to the general procedure **E** and was purified by flash column chromatography (EtOAc : hexane = 40 : 60) afforded 43.6 mg of **3nb** in 71 % yield as red solid. The NMR data of **3nb** is in accordance with the literature.<sup>7</sup>

<sup>7</sup> Bettadapur, K. R.; Lanke, V.; Prabhu, K. R. *Org. Lett.* **2015**, *17*, 4658-4661.

**<sup>1</sup>H NMR** (400 MHz, CDCl<sub>3</sub>):  $\delta$  7.85 (dd,  $J$  = 7.6, 1.5 Hz, 1H), 7.51-7.41 (m, 4H), 7.35-7.28 (m, 3H), 7.17 (dd,  $J$  = 7.3, 1.2 Hz, 1H), 4.79 (dd,  $J$  = 14.0 Hz, 1H), 4.74 (dd,  $J$  = 14.0 Hz, 1H), 4.39 (dd,  $J$  = 9.4, 6.2 Hz, 1H), 3.19 (dd,  $J$  = 18.0, 9.5 Hz, 1H), 2.76 (dd,  $J$  = 17.9, 6.1 Hz, 1H), 2.57 (s, 3H).

**<sup>13</sup>C NMR** (100 MHz, CDCl<sub>3</sub>):  $\delta$  201.2, 177.6, 175.8, 136.5, 136.2, 135.9, 132.7, 131.5, 130.7, 128.8, 128.5, 128.1, 127.1, 45.9, 42.5, 37.6, 28.7.

### 3-(2-Acetyl-5-methoxyphenyl)-1-benzylpyrrolidine-2,5-dione (**3ob**):

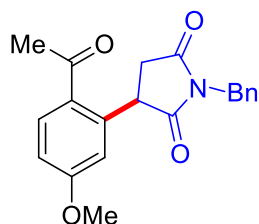

Compound **3ob** was prepared according to the general procedure **E** and was purified by flash column chromatography (EtOAc : hexane = 50 : 50) afforded 43.6 mg of **3ob** in 64 % yield (24 h) as red solid. 47.2 mg of **3ob** in 70 % yield obtained when the reaction was continued for 36 h. The NMR data of **3ob** is in accordance with the literature.<sup>7</sup>

**<sup>1</sup>H NMR** (400 MHz, CDCl<sub>3</sub>):  $\delta$  7.87 (d,  $J$  = 8.6 Hz, 1H), 7.46-7.44 (m, 2H), 7.34-7.27 (m, 3H), 6.87 (dd,  $J$  = 8.7, 2.5 Hz, 1H), 6.63 (d,  $J$  = 2.5 Hz, 1H), 4.80 (d,  $J$  = 14.2 Hz, 1H), 4.73 (d,  $J$  = 14.2 Hz, 1H), 4.38 (m, 1H), 3.77 (s, 3H), 3.16 (dd,  $J$  = 18.0, 9.4 Hz, 1H), 2.68 (dd,  $J$  = 17.9, 6.1 Hz, 1H), 2.52 (s, 3H).

**<sup>13</sup>C NMR** (100 MHz, CDCl<sub>3</sub>):  $\delta$  198.9, 177.5, 175.9, 162.6, 139.4, 136.1, 133.8, 128.8, 128.4, 128.2, 127.7, 117.7, 112.4, 55.3, 44.4, 42.4, 37.4, 28.3.

### 3-(2-Acetyl-5-methylphenyl)-1-benzylpyrrolidine-2,5-dione (**3pb**):

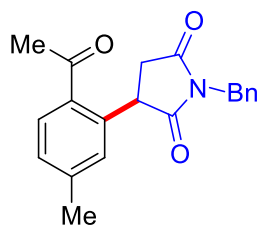

Compound **3pb** was prepared according to the general procedure **E** and was purified by flash column chromatography (EtOAc : hexane = 50 : 50) afforded 39.2 mg of **3pb** in 61 % yield as dense colourless liquid. The NMR data of **3pb** is in accordance with the literature.<sup>7</sup>

**<sup>1</sup>H NMR** (500 MHz, CDCl<sub>3</sub>):  $\delta$  7.76 (d,  $J$  = 8.0 Hz, 1H), 7.46-7.44 (m, 2H), 7.34-7.27 (m, 3H), 7.21 (dd,  $J$  = 8.0, 1.0 Hz, 1H), 6.92 (bs, 1H), 4.79 (d,  $J$  = 14.1 Hz, 1H), 4.73 (d,  $J$  = 14.1 Hz, 1H), 4.36 (dd,  $J$  = 8.7, 6.2 Hz, 1H), 3.16 (dd,  $J$  = 18.0, 9.4 Hz, 1H), 2.70 (dd,  $J$  = 18.0, 6.0 Hz, 1H), 2.53 (s, 3H), 2.33 (s, 3H).

**<sup>13</sup>C NMR** (125 MHz, CDCl<sub>3</sub>):  $\delta$  200.4, 177.8, 175.9, 143.5, 136.8, 136.0, 133.2, 132.3, 131.1, 128.8, 128.6, 128.4, 127.7, 45.9, 42.4, 37.6, 28.5, 21.3.

### 3-(2-Acetyl-3-methoxyphenyl)-1-benzylpyrrolidine-2,5-dione (**3qb**):

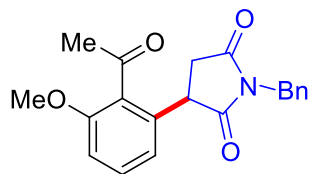

Compound **3qb** was prepared according to the general procedure **E** and was purified by flash column chromatography (EtOAc : hexane = 45 : 55) afforded 31.0 mg of **3qb** in 46 % yield as colourless liquid.

**<sup>1</sup>H NMR** (500 MHz, CDCl<sub>3</sub>):  $\delta$  7.41-7.39 (m, 2H), 7.33-7.28 (m, 4H), 6.89 (d,  $J$  = 8.3 Hz, 1H), 6.93 (d,  $J$  = 7.8 Hz, 1H), 4.72 (d,  $J$  = 14.2 Hz, 1H), 4.70 (d,  $J$  = 14.2 Hz, 1H), 4.07 (dd,  $J$  = 9.5, 5.5 Hz, 1H), 3.85 (s, 3H), 3.15 (dd,  $J$  = 18.4, 9.6 Hz, 1H), 2.83 (dd,  $J$  = 18.4, 5.5 Hz, 1H), 2.51 (s, 3H).

**<sup>13</sup>C NMR** (125 MHz, CDCl<sub>3</sub>):  $\delta$  205.2, 177.4, 175.6, 157.4, 135.79, 135.74, 131.3, 130.8, 128.7, 128.6, 127.9, 120.4, 110.6, 55.7, 43.9, 42.6, 38.1, 32.4.

**HRMS** calculated for C<sub>28</sub>H<sub>19</sub>N<sub>2</sub>O<sub>2</sub> is [M+H]<sup>+</sup> : 338.1392; found: 338.1391.

### 3-(3-Acetylnaphthalen-2-yl)-1-benzylpyrrolidine-2,5-dione (**3rb**):

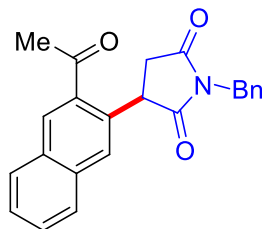

Compound **3rb** was prepared according to the general procedure **E** and was purified by flash column chromatography (EtOAc : hexane = 40 : 60) afforded 46.5 mg of **3rb** in 65 % yield as white solid.

**<sup>1</sup>H NMR** (400 MHz, CDCl<sub>3</sub>):  $\delta$  8.40 (s, 1H), 7.92 (d,  $J$  = 7.6 Hz, 1H), 7.74 (d,  $J$  = 8.1 Hz, 1H), 7.63-7.54 (m, 3H), 7.50-7.48 (m, 2H), 7.37-7.29 (m, 3H), 4.83 (d,  $J$  = 14.2 Hz, 1H), 4.79 (d,  $J$  = 14.2 Hz, 1H), 4.52 (dd,  $J$  = 9.9, 6.1 Hz, 1H), 3.21 (dd,  $J$  = 18.0, 9.4 Hz, 1H), 2.84 (dd,  $J$  = 18.0, 6.0 Hz, 1H), 2.69 (s, 3H).

**<sup>13</sup>C NMR** (100 MHz, CDCl<sub>3</sub>):  $\delta$  200.7, 178.0, 176.0, 136.0, 134.6, 133.5, 132.9, 132.4, 131.7, 131.2, 129.0, 128.9, 128.6, 128.5, 127.7, 127.3, 127.2, 46.3, 42.5, 37.6, 28.4.

**HRMS** calculated for C<sub>23</sub>H<sub>20</sub>NO<sub>3</sub> is [M+H]<sup>+</sup> : 358.1443; found: 358.1441.

### 3-(2-Acetylthiophen-3-yl)-1-benzylpyrrolidine-2,5-dione (**3sb**):

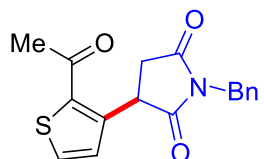

Compound **3sb** was prepared according to the general procedure **E** and was purified by flash column chromatography (EtOAc : hexane = 30 : 70) afforded 47.0 mg of **3sb** in 75 % yield as colourless liquid. The NMR

data of **3sb** is in accordance with the literature.<sup>7</sup>

**<sup>1</sup>H NMR** (400 MHz, CDCl<sub>3</sub>): δ 7.48 (d, *J* = 4.9 Hz, 1H), 7.44-7.41 (m, 2H), 7.34-7.27 (m, 3H), 6.93 (d, *J* = 5.0 Hz, 1H), 4.79 (d, *J* = 14.2 Hz, 1H), 4.72 (d, *J* = 14.2 Hz, 1H), 4.67 (dd, *J* = 9.5, 6.0 Hz, 1H), 3.18 (dd, *J* = 18.1, 9.6 Hz, 1H), 2.62 (dd, *J* = 17.9, 6.0 Hz, 1H), 2.52 (s, 3H).

**<sup>13</sup>C NMR** (100 MHz, CDCl<sub>3</sub>): δ 190.7, 176.7, 175.5, 142.4, 136.2, 135.8, 130.8, 130.6, 128.7, 128.5, 127.7, 42.5, 41.5, 36.4, 28.1.

#### Compound (3tb):

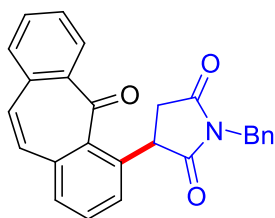

Compound **3tb** was prepared according to the general procedure **E** and was purified by flash column chromatography (EtOAc : hexane = 15 : 85) afforded 72.4 mg of **3tb** in 92 % yield as white solid.

**<sup>1</sup>H NMR** (400 MHz, CDCl<sub>3</sub>): δ 7.58-7.50(m, 4H), 7.48-7.43 (m, 4H), 7.40-7.30 (m, 3H), 7.24-7.19 (m, 1H), 7.05-6.98 (m, 2H), 4.88 (d, *J* = 14.1 Hz, 1H), 4.81 (d, *J* = 14.1 Hz, 1H), 4.31 (dd, *J* = 9.4, 6.1 Hz, 1H), 3.32 (dd, *J* = 18.2, 9.5 Hz, 1H), 3.03 (dd, *J* = 18.3, 5.9 Hz, 1H).

**<sup>13</sup>C NMR** (125 MHz, CDCl<sub>3</sub>): δ 196.9, 177.4, 175.8, 140.3, 136.9, 136.7, 135.9, 135.2, 133.4, 131.38, 131.33, 130.8, 130.7, 130.2, 129.1, 128.8, 128.5, 127.8, 46.0, 42.6, 38.7.

**HRMS** calculated for C<sub>26</sub>H<sub>20</sub>NO<sub>3</sub> is [M+H]<sup>+</sup> : 394.1443; found: 394.1446.

#### 1-Benzyl-3-(2-pivaloylphenyl)pyrrolidine-2,5-dione (3ab):

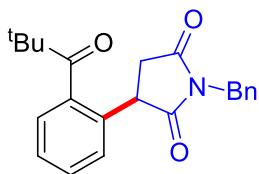

Compound **3ab** was prepared according to the general procedure **E** and was purified by flash column chromatography (EtOAc : hexane = 8 : 92) afforded 67.0 mg of **3ab** in 96 % yield as white solid.

**<sup>1</sup>H NMR** (500 MHz, CDCl<sub>3</sub>): δ 7.45 (dd, *J* = 8.8, 1.2 Hz, 1H), 7.43-7.41 (m, 2H), 7.36-7.28 (m, 5H), 7.02 (dd, *J* = 7.8, 0.9 Hz, 1H), 4.71 (d, *J* = 14.1 Hz, 1H), 4.71 (d, *J* = 14.1 Hz, 1H), 3.92 (dd, *J* = 9.5, 5.4 Hz, 1H), 3.15 (dd, *J* = 18.4, 9.6 Hz, 1H), 2.76 (dd, *J* = 18.4, 5.4 Hz, 1H), 1.30 (s, 9H).

**<sup>13</sup>C NMR** (125 MHz, CDCl<sub>3</sub>): δ 213.2, 177.4, 175.4, 139.8, 135.7, 135.5 (overlapped), 130.2, 128.7, 128.5, 127.8, 126.7, 126.0, 44.7, 44.3, 42.5, 38.7, 27.7.

**HRMS** calculated for C<sub>22</sub>H<sub>23</sub>NNaO<sub>3</sub> is [M+Na]<sup>+</sup> : 372.1576; found: 372.1573.

### 1-Methyl-3-(2-pivaloylphenyl)pyrrolidine-2,5-dione (**3ac**):

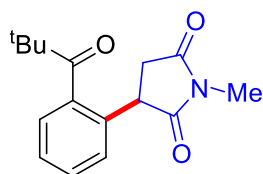

Compound **3ac** was prepared according to the general procedure **E** and was purified by flash column chromatography (EtOAc : hexane = 20 : 80) afforded 44.1 mg of **3ac** in 81 % yield as red solid.

**<sup>1</sup>H NMR** (500 MHz, CDCl<sub>3</sub>):  $\delta$  7.46, (d,  $J$  = 7.7 Hz, 1H), 7.36 (td,  $J$  = 7.6, 1.3 Hz, 1H), 7.29 (td,  $J$  = 7.6, 1.2 Hz, 1H), 7.13 (d,  $J$  = 7.8 Hz, 1H), 3.92 (dd,  $J$  = 9.5, 5.6 Hz, 1H), 3.12 (dd,  $J$  = 18.3, 9.6 Hz, 1H), 3.02 (s, 3H), 2.77 (dd,  $J$  = 18.3, 5.6 Hz, 1H), 1.28 (s, 9H).

**<sup>13</sup>C NMR** (125 MHz, CDCl<sub>3</sub>):  $\delta$  213.3, 177.9, 175.9, 139.6, 135.4, 130.2, 129.2, 126.7, 126.1, 44.6 (overlapped with quaternary carbon of -CMe<sub>3</sub>), 38.5, 27.8, 24.9.

**HRMS** calculated for C<sub>16</sub>H<sub>20</sub>NO<sub>3</sub> is [M+H]<sup>+</sup> : 274.1443; found: 274.1443.

### 1-Ethyl-3-(2-pivaloylphenyl)pyrrolidine-2,5-dione (**3ad**):

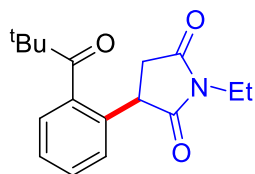

Compound **3ad** was prepared according to the general procedure **E** and was purified by flash column chromatography (EtOAc : hexane = 18 : 82) afforded 47.1 mg of **3ad** in 82 % yield as red solid.

**<sup>1</sup>H NMR** (500 MHz, CDCl<sub>3</sub>):  $\delta$  7.46, (d,  $J$  = 7.7, 1.1 Hz, 1H), 7.38 (td,  $J$  = 7.6, 1.3 Hz, 1H), 7.30 (td,  $J$  = 7.6, 1.1 Hz, 1H), 7.11 (d,  $J$  = 7.8 Hz, 1H), 3.90 (dd,  $J$  = 9.5, 5.5 Hz, 1H), 3.66-3.56 (m, 2H), 3.12 (dd,  $J$  = 18.3, 9.5 Hz, 1H), 2.74 (dd,  $J$  = 18.3, 5.5 Hz, 1H), 1.31 (s, 9H), 1.22 (t,  $J$  = 7.2 Hz, 3H).

**<sup>13</sup>C NMR** (125 MHz, CDCl<sub>3</sub>):  $\delta$  213.2, 177.6, 175.7, 139.7, 135.6, 130.3, 128.8, 126.7, 126.1, 44.7, 44.4, 38.6, 33.9, 27.9, 13.0.

**HRMS** calculated for C<sub>17</sub>H<sub>22</sub>NO<sub>3</sub> is [M+H]<sup>+</sup> : 288.1600; found: 288.1601.

### 1-Isobutyl-3-(2-pivaloylphenyl) pyrrolidine-2,5-dione (**3ae**):

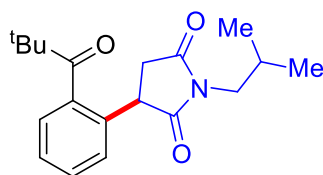

Compound **3ae** was prepared according to the general procedure **E** and was purified by flash column chromatography (EtOAc : hexane = 13 : 87) afforded 61.2 mg of **3ae** in 97 % yield as colourless liquid.

**<sup>1</sup>H NMR** (500 MHz, CDCl<sub>3</sub>):  $\delta$  7.44 (d,  $J$  = 7.7 Hz, 1H), 7.38 (t,  $J$  = 7.6 Hz, 1H), 7.29 (t,  $J$  = 7.6 Hz, 1H), 7.11 (d,  $J$  = 7.8 Hz, 1H), 3.92 (dd,  $J$  = 9.6, 5.6 Hz, 1H), 3.41-3.33 (m, 2H), 3.14 (dd,  $J$  = 18.4,

9.6 Hz, 1H), 2.75 (dd,  $J = 18.4, 5.6$  Hz, 1H), 2.07 (sep,  $J = 6.9$  Hz, 1H), 1.30 (s, 9H), 0.91 (dd,  $J = 6.7, 2.2$  Hz, 6H).

$^{13}\text{C}$  NMR (125 MHz,  $\text{CDCl}_3$ ):  $\delta$  213.3, 177.9, 176.0, 140.0, 135.5, 130.2, 128.5, 126.6, 126.0, 46.2, 44.7, 44.1, 38.5, 27.8, 27.0, 20.1, 20.0.

HRMS calculated for  $\text{C}_{19}\text{H}_{26}\text{NO}_3$  is  $[\text{M}+\text{H}]^+$  : 316.1913; found: 316.1910.

### 1-(4-Methoxyphenyl)-3-(2-pivaloylphenyl)pyrrolidine-2,5-dione (3af):

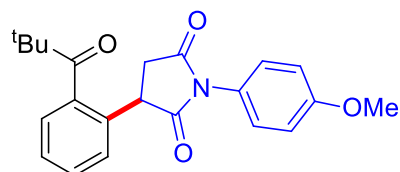

Compound **3af** was prepared according to the general procedure **E** and was purified by flash column chromatography (EtOAc : hexane = 15 : 85) afforded 64.9 mg of **3af** in 95 % yield as red solid.

$^1\text{H}$  NMR (500 MHz,  $\text{CDCl}_3$ ):  $\delta$  7.57 (dd,  $J = 7.7, 1.1$  Hz, 1H), 7.43 (td,  $J = 7.6, 1.2$  Hz, 1H), 7.34 (td,  $J = 7.6, 1.1$  Hz, 1H), 7.29-7.26 (m, 3H), 7.00-6.97 (m, 2H), 4.13 (dd,  $J = 9.7, 5.9$  Hz, 1H), 3.82 (s, 3H), 3.28 (dd,  $J = 18.3, 9.7$  Hz, 1H), 2.99 (dd,  $J = 18.3, 5.9$  Hz, 1H), 1.31 (s, 9H).

$^{13}\text{C}$  NMR (125 MHz,  $\text{CDCl}_3$ ):  $\delta$  213.3, 177.1, 175.2, 159.5, 139.1, 135.7, 130.4, 129.9, 127.9, 126.8, 126.6, 124.7, 114.4, 55.4, 45.0, 44.7, 38.6, 28.1.

HRMS calculated for  $\text{C}_{22}\text{H}_{23}\text{NNaO}_4$  is  $[\text{M}+\text{Na}]^+$ : 388.1525; found: 388.1529.

### 1-(4-Nitrophenyl)-3-(2-pivaloylphenyl)pyrrolidine-2,5-dione (3ag):

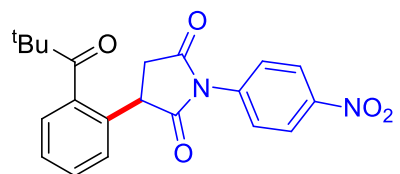

Compound **3ag** was prepared according to the general procedure **E** and was purified by flash column chromatography (EtOAc : hexane = 20 : 80) afforded 67.7 mg of **3ag** in 89 % yield as red solid.

$^1\text{H}$  NMR (500 MHz,  $\text{CDCl}_3$ ):  $\delta$  8.34-8.31 (m, 2H), 7.68-7.65 (m, 3H), 7.46 (td,  $J = 7.6, 1.3$  Hz, 1H), 7.38 (td,  $J = 7.6, 1.2$  Hz, 1H), 7.29 (d,  $J = 7.7$  Hz, 1H), 4.20 (dd,  $J = 9.8, 6.2$  Hz, 1H), 3.33 (dd,  $J = 18.4, 9.8$  Hz, 1H), 3.05 (dd,  $J = 18.4, 6.2$  Hz, 1H), 1.28 (s, 9H).

$^{13}\text{C}$  NMR (125 MHz,  $\text{CDCl}_3$ ):  $\delta$  213.2, 176.2, 174.1, 147.0, 138.2, 137.7, 135.3, 134.5, 131.0, 130.8, 127.3, 127.2, 124.2, 44.7, 44.6, 38.5, 28.2.

HRMS calculated for  $\text{C}_{21}\text{H}_{20}\text{N}_2\text{NaO}_5$  is  $[\text{M}+\text{Na}]^+$  : 403.1270; found: 403.1270.

### 1-(4-Bromophenyl)-3-(2-pivaloylphenyl)pyrrolidine-2,5-dione (**3ah**):

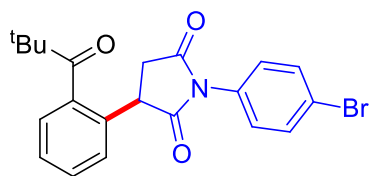

Compound **3ah** was prepared according to the general procedure **E** and was purified by flash column chromatography (EtOAc: hexane = 7 : 93) afforded 77.9 mg of **3ah** in 94 % yield as white solid.

**<sup>1</sup>H NMR** (500 MHz, CDCl<sub>3</sub>): δ 7.62-7.59 (m, 3H), 7.47-7.43 (m, 1H), 7.38-7.35 (m, 1H), 7.29-7.27 (m, 3H), 4.15 (dd, *J* = 9.7, 6.1 Hz, 1H), 3.29 (dd, *J* = 18.3, 9.7 Hz, 1H), 3.02 (dd, *J* = 18.3, 6.1 Hz, 1H), 1.29 (s, 9H).

**<sup>13</sup>C NMR** (125 MHz, CDCl<sub>3</sub>): δ 213.3, 176.7, 174.6, 138.6, 135.4, 132.2, 131.0, 130.6, 130.5, 128.3, 127.08, 127.00, 122.5, 44.4, 44.6, 38.6, 28.1.

**HRMS** calculated for C<sub>21</sub>H<sub>20</sub>BrNNaO<sub>3</sub> is [M+Na]<sup>+</sup> : 436.0524; found: 436.0522.

### 1-Cyclohexyl-3-(2-pivaloylphenyl)pyrrolidine-2,5-dione (**3ai**):

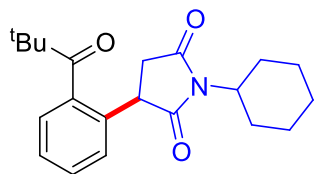

Compound **3ai** was prepared according to the general procedure **E** and was purified by flash column chromatography (EtOAc : hexane = 13 : 87) afforded 68.3 mg of **3ai** in 97 % yield as colourless liquid.

**<sup>1</sup>H NMR** (500 MHz, CDCl<sub>3</sub>): δ 7.43 (dd, *J* = 7.7, 0.8 Hz, 1H), 7.37 (td, *J* = 7.6, 1.2 Hz, 1H), 7.29 (td, *J* = 7.6, 1.1 Hz, 1H), 7.08 (d, *J* = 7.5 Hz, 1H), 4.01 (tt, *J* = 12.4, 3.8 Hz, 1H), 3.83 (dd, *J* = 9.6, 5.5 Hz, 1H), 3.07 (dd, *J* = 18.3, 9.6 Hz, 1H), 2.67 (dd, *J* = 18.3, 5.5 Hz, 1H), 2.17 (qd, *J* = 18.3, 3.5 Hz, 2H), 1.84-1.81 (m, *J* = 2.0 Hz, 2H), 1.68-1.63 (m, 3H), 1.33-1.31 (m, 10H), 1.27-1.18 (m, 2H).

**<sup>13</sup>C NMR** (125 MHz, CDCl<sub>3</sub>): δ 213.2, 177.8, 176.0, 139.9, 135.9, 130.2, 128.3, 126.6, 126.0, 52.0, 44.7, 43.9, 38.5, 28.8, 28.7, 27.8, 25.8 (overlapped), 25.0.

**HRMS** calculated for C<sub>21</sub>H<sub>28</sub>NO<sub>3</sub> is [M+H]<sup>+</sup> : 342.2069; found: 342.2065.

### 1-((S)-1-Phenylethyl)-3-(2-pivaloylphenyl)pyrrolidine-2,5-dione (**3aj**):

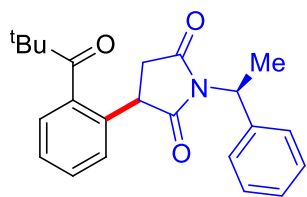

Compound **3aj** was prepared according to the general procedure **E** and was purified by flash column chromatography (EtOAc : hexane = 17 : 83) afforded 50.9 mg of **3aj** in 70 % yield (d.r. = 1.2:1.0) as colourless liquid.

Major Diastereomer: **<sup>1</sup>H NMR** (500 MHz, CDCl<sub>3</sub>): δ 7.50-7.43 (m, 3H), 7.38-7.28 (m, 5H), 7.02 (d, *J* = 7.8 Hz, 1H), 5.52-5.48 (q, *J* = 7.4 Hz, 1H), 3.83-3.81 (m, 1H), 3.09-3.04 (m, 1H), 2.67 (dd, *J* = 18.4, 5.4 Hz, 1H), 1.87 (d, *J* = 7.3 Hz, 3H), 1.31 (s, 9H).

**<sup>13</sup>C NMR** (125 MHz, CDCl<sub>3</sub>): δ 213.22, 177.56, 175.64, 139.65, 139.53, 135.89, 130.29, 128.18, 128.39 (overlapped with minor), 127.75 (overlapped with minor), 127.52, 126.69, 126.01, 50.54, 44.81, 43.99, 38.64, 27.84, 16.60.

Minor Diastereomer: **<sup>1</sup>H NMR** (500 MHz, CDCl<sub>3</sub>): δ 7.50-7.43 (m, 3H), 7.38-7.28 (m, 5H), 6.96 (d, *J* = 7.7 Hz, 1H), 5.49-5.45 (q, *J* = 7.4 Hz, 1H), 3.86-3.84 (m, 1H), 3.14-3.10 (m, 1H), 2.71 (dd, *J* = 18.4, 5.4 Hz, 1H), 1.89 (dd, *J* = 7.3 Hz, 3H), 1.31 (s, 9H).

**<sup>13</sup>C NMR** (125 MHz, CDCl<sub>3</sub>): δ 213.25, 177.62, 175.67, 139.98, 139.73, 135.78, 130.27, 128.6, 128.39, 127.75, 127.55, 126.67, 126.08, 50.60, 44.76, 44.19, 38.65, 27.85, 16.53.

**HRMS** calculated for C<sub>23</sub>H<sub>26</sub>NO<sub>3</sub> is [M+H]<sup>+</sup> : 364.1913; found: 364.1904.

### 3-(2-Pivaloylphenyl)pyrrolidine-2,5-dione (**3ak**):

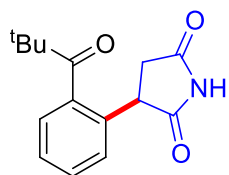

Compound **3ak** was prepared according to the general procedure **E** and was purified by flash column chromatography (EtOAc : hexane = 20 : 80) afforded 32.1 mg of **3ak** in 62 % yield as colourless liquid.

**<sup>1</sup>H NMR** (400 MHz, CDCl<sub>3</sub>): δ 8.86 (bs, 1H), 7.47 (dd, *J* = 7.4, 0.9 Hz, 1H), 7.41 (td, *J* = 7.7, 1.4 Hz, 1H), 7.32 (td, *J* = 7.6, 1.0 Hz, 1H), 7.23-7.21 (m, 1H), 4.00 (dd, *J* = 9.6, 5.8 Hz, 1H), 3.19 (dd, *J* = 18.5, 9.7 Hz, 1H), 2.83 (dd, *J* = 18.5, 5.8 Hz, 1H), 1.31 (s, 9H).

**<sup>13</sup>C NMR** (125 MHz, CDCl<sub>3</sub>): δ 213.4, 178.3, 176.3, 139.7, 135.0, 130.3, 129.0, 126.9, 126.1, 45.8, 44.8, 39.8, 27.8.

**HRMS** calculated for C<sub>15</sub>H<sub>18</sub>NO<sub>3</sub> is [M+H]<sup>+</sup> : 260.1287; found: 260.1284.

**Catalytic Procedure for the synthesis of 1,1'-(ethane-1,2-diyl)bis(3-(2-pivaloylphenyl)pyrrolidine-2,5-dione) (3al):**

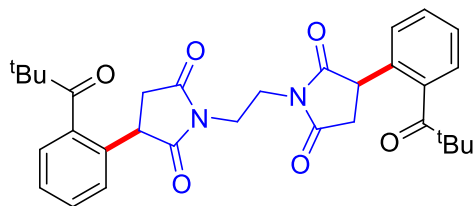

An oven-dried Schlenk tube equipped with a magnetic stir bar was charged with Cp\*Co(CO)I<sub>2</sub> (9.5 mg, 0.02 mmol, 10 mol %), AgSbF<sub>6</sub> (14.0 mg, 0.04 mmol, 20 mol %), NaOAc (1.6 mg, 0.02 mmol, 10 mol %) under argon atmosphere. Small amount of 1,2-DCE (0.2 mL) was added to the Schlenk tube and stirred for few minutes. 2,2-Dimethyl-1-phenylpropan-1-one **1a** (0.42 mmol, 2.1 equiv.), 1,1'-(ethane-1,2-diyl)bis(1*H*-pyrrole-2,5-dione) **2l** (37.4 mg, 0.2 mmol, 1.0 equiv.) followed by 0.8 mL 1,2-DCE were successively added to the Schlenk. The closed tube was placed to a pre-heated oil bath at 120 °C for 30 h. After completion of the reaction, the reaction mixture was then allowed to cool down to room temperature. The crude reaction mixture was purified by flash column chromatography (EtOAc : hexane = 30 : 70) afforded 70.9 mg of **3al** in 65 % yield as colourless liquid.

**<sup>1</sup>H NMR** (400 MHz, CDCl<sub>3</sub>): δ 7.40-7.32 (m, 4H), 7.29-7.22 (m, 4H), 3.86-3.73 (m, 6H), 3.11-3.03 (m, 2H), 2.73-2.66 (m, 2H), 1.26 (s, 18H).

**<sup>13</sup>C NMR** (100 MHz, CDCl<sub>3</sub>): δ 213.56, 213.54, 178.15, 178.12, 176.21 (overlapped), 140.1, 140.0, 134.76 (overlapped), 130.2 (overlapped), 129.18 (overlapped), 126.71 (overlapped), 125.79, 125.71, 44.7 (overlapped), 44.3, 44.2, 38.5 (overlapped), 37.5, 37.4, 27.79, 27.71.

**HRMS** calculated for C<sub>32</sub>H<sub>40</sub>N<sub>3</sub>O<sub>6</sub> is [M+NH<sub>4</sub>]<sup>+</sup> : 562.2917; found: 562.2919.

**Ethyl 3-(2-pivaloylphenyl)propanoate (3am):**

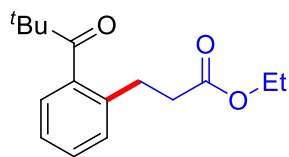

Compound **3am** was prepared according to the general procedure **G** and the was purified by flash column chromatography (EtOAc : hexane = 2 : 98) afforded 20.1 mg of **3am** in 38 % yield as colourless liquid.

**<sup>1</sup>H NMR** (400 MHz, CDCl<sub>3</sub>): δ 7.32-7.28 (m, 1H), 7.26-7.16 (m, 2H), 4.12 (q, *J* = 7.2 Hz, 2H), 2.80-2.76 (m, 2H), 2.62-2.58 (m, 2H), 1.26 (s, 9H), 1.23 (t, *J* = 7.0 Hz, 3H).

**<sup>13</sup>C NMR** (100 MHz, CDCl<sub>3</sub>): δ 214.5, 172.7, 140.6, 136.9, 129.5, 128.9, 125.4, 124.8, 60.4, 44.9, 35.9, 28.9, 27.4, 14.1.

**LCMS** calculated for C<sub>16</sub>H<sub>23</sub>O<sub>3</sub> is [M+H]<sup>+</sup>: 263.1647; found: 263.2.

### Ethyl 3-(5-*tert*-butyl-2-pivaloylphenyl)propanoate (**3an**):

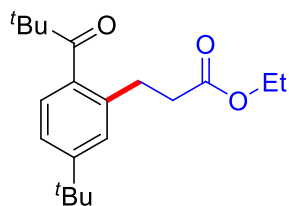

Compound **3an** was prepared according to the general procedure **G** and was purified by flash column chromatography (EtOAc : hexane = 2 : 98) afforded 18 mg of **3an** in 27 % yield as colourless liquid.

**<sup>1</sup>H NMR** (400 MHz, CDCl<sub>3</sub>): δ 7.25 (d, *J* = 1.6 Hz, 1H), 7.20 (dd, *J* = 8.1, 1.8 Hz, 1H), 7.14 (d, *J* = 8.0 Hz, 1H), 4.12 (q, *J* = 7.1 Hz, 2H), 2.81-2.77 (m, 2H), 2.63-2.59 (m, 2H), 1.30 (s, 9H), 1.26 (s, 9H), 1.24 (t, *J* = 7.2 Hz, 3H).

**<sup>13</sup>C NMR** (100 MHz, CDCl<sub>3</sub>): δ 214.6, 172.9, 152.0, 137.7, 136.9, 126.6, 124.8, 122.3, 60.3, 44.9, 36.3, 34.6, 31.1, 29.3, 27.5, 14.2.

**LCMS** calculated for C<sub>20</sub>H<sub>31</sub>O<sub>3</sub> is [M+H]: 319.2273; found: 319.2.

### Ethyl 3-(5-methoxy-2-pivaloylphenyl)propanoate (**3ao**):

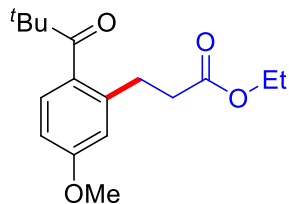

Compound **3ao** was prepared according to the general procedure **E** and was purified by flash column chromatography (EtOAc : hexane = 3 : 97) afforded 17.9 mg of **3ao** in 31 % yield as colourless liquid.

**<sup>1</sup>H NMR** (400 MHz, CDCl<sub>3</sub>): δ 7.20 (d, *J* = 8.5 Hz, 1H), 6.78 (d, *J* = 2.5 Hz, 1H), 6.72 (dd, *J* = 8.5, 2.5 Hz, 1H), 4.12 (q, *J* = 7.2 Hz, 1H), 3.80 (s, 3H), 2.80-2.76 (m, 2H), 2.63-2.59 (m, 2H), 1.25 (s, 9H), 1.23 (t, *J* = 6.9 Hz, 3H).

**<sup>13</sup>C NMR** (100 MHz, CDCl<sub>3</sub>): δ 213.6, 172.8, 159.8, 139.9, 132.9, 126.7, 115.2, 110.6, 60.4, 55.2, 44.9, 36.0, 29.1, 27.7, 14.1.

**LCMS** calculated for C<sub>17</sub>H<sub>25</sub>O<sub>4</sub> is [M+H]: 293.1753; found: 293.2.

### Ethyl 2-(1-benzyl-2,5-dioxopyrrolidin-3-yl)-5-methylbenzoate (**5ab**):

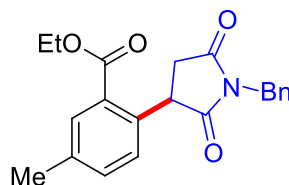

Compound **5ab** was prepared according to the general procedure **F** and was purified by flash column chromatography (EtOAc : hexane = 10 : 90) afforded 31.0 mg of **5ab** in 44 % yield as colourless liquid.

**<sup>1</sup>H NMR** (400 MHz, CDCl<sub>3</sub>): δ 7.83 (d, *J* = 1.1 Hz, 1H), 7.45 (dd, *J* = 8.0, 1.2 Hz, 2H), 7.34-7.27 (m, 4H), 7.02 (d, *J* = 7.9 Hz, 1H), 4.75 (d, *J* = 14.1 Hz, 1H), 4.74 (d, *J* = 14.1 Hz, 1H), 4.54 (dd, *J* = 9.3, 6.2 Hz, 1H), 4.22 (q, *J* = 7.1 Hz, 2H), 3.19 (dd, *J* = 18.1, 9.5 Hz, 1H), 2.75 (dd, *J* = 17.9, 6.1 Hz, 1H), 2.37 (s, 3H), 1.33 (t, *J* = 7.1 Hz, 3H).

**<sup>13</sup>C NMR** (100 MHz, CDCl<sub>3</sub>): δ 178.0, 176.0, 166.9, 138.1, 136.1, 135.4, 133.6, 132.1, 130.8, 129.0, 128.8, 128.6, 127.8, 61.3, 45.5, 42.6, 37.9, 21.0, 14.3.

**HRMS** calculated for C<sub>21</sub>H<sub>22</sub>NO<sub>4</sub> is [M+H]<sup>+</sup> : 352.1549; found: 352.1542.

**Ethyl 2-(1-benzyl-2,5-dioxopyrrolidin-3-yl)-4-methylbenzoate (5bb):**

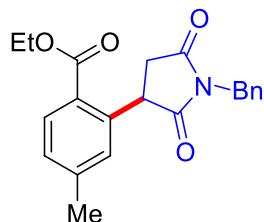

Compound **5bb** was prepared according to the general procedure **F** and was purified by flash column chromatography (EtOAc : hexane = 10 : 90) afforded 43.0 mg of **5bb** in 61 % yield as colourless liquid.

**<sup>1</sup>H NMR** (500 MHz, CDCl<sub>3</sub>): δ 7.93 (d, *J* = 8.0 Hz, 1H), 7.47-7.46 (m, 2H), 7.34-7.27 (m, 3H), 7.16 (dd, *J* = 7.8, 0.9 Hz, 1H), 6.88 (bs, 1H), 4.77 (d, *J* = 14.1 Hz, 1H), 4.74 (d, *J* = 14.1 Hz, 1H), 4.61-4.58 (m, 1H), 4.22 (q, *J* = 7.1 Hz, 2H), 3.20 (dd, *J* = 18.1, 9.5 Hz, 1H), 2.74 (dd, *J* = 18.1, 5.9 Hz, 1H), 2.32 (s, 3H), 1.33 (t, *J* = 7.1 Hz, 3H).

**<sup>13</sup>C NMR** (125 MHz, CDCl<sub>3</sub>): δ 177.9, 176.0, 166.6, 143.5, 138.5, 136.0, 131.6, 131.4, 128.9, 128.6, 128.5, 127.7, 126.0, 61.0, 45.5, 42.5, 37.8, 21.3, 14.1.

**HRMS** calculated for C<sub>21</sub>H<sub>22</sub>NO<sub>4</sub> is [M+H]<sup>+</sup> : 352.1549; found: 352.1549.

**Ethyl 2-(1-benzyl-2,5-dioxopyrrolidin-3-yl)-4-*tert*-butylbenzoate (5cb):**

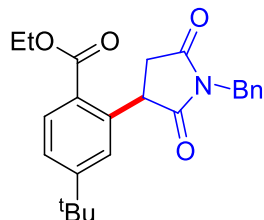

Compound **5cb** was prepared according to the general procedure **F** and was purified by flash column chromatography (EtOAc : hexane = 3 : 97) afforded 44.0 mg of **5cb** in 56 % yield as colourless liquid.

**<sup>1</sup>H NMR** (500 MHz, CDCl<sub>3</sub>): δ 7.96 (d, *J* = 8.3 Hz, 1H), 7.48-7.46 (m, 2H), 7.38 (dd, *J* = 8.3, 2.0 Hz, 1H), 7.34 -7.27 (m, 3H), 7.08 (d, *J* = 1.9 Hz, 1H), 4.78 (d, *J* = 14.1 Hz, 1H), 4.75 (d, *J* = 14.1 Hz, 1H), 4.58 (dd, *J* = 8.8, 5.9 Hz, 1H), 4.22 (q, *J* = 7.1 Hz, 2H), 3.21 (dd, *J* = 18.1, 6.0 Hz, 1H), 2.78 (dd, *J* = 18.1, 6.0 Hz, 1H), 1.32 (t, *J* = 7.2 Hz, 3H), 1.25 (s, 9H).

**<sup>13</sup>C NMR** (100 MHz, CDCl<sub>3</sub>): δ 178.0, 176.1, 166.6, 156.5, 138.2, 136.1, 131.4, 129.1, 128.9, 128.5, 127.7, 125.8, 125.1, 61.0, 46.1, 42.5, 37.9, 34.9, 30.9, 14.2.

**HRMS** calculated for C<sub>24</sub>H<sub>28</sub>NO<sub>4</sub> is [M+H]<sup>+</sup> : 394.2018; found: 394.2016.

**Ethyl 2-(1-benzyl-2,5-dioxopyrrolidin-3-yl)-4-chlorobenzoate (**5db**):**

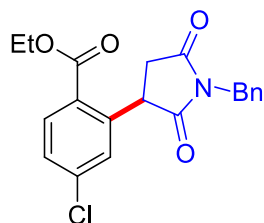

Compound **5db** was prepared according to the general procedure **F** and was purified by flash column chromatography (EtOAc : hexane = 8 : 92) afforded 26.0 mg of **5db** in 35 % yield as colourless liquid.

**<sup>1</sup>H NMR** (500 MHz, CDCl<sub>3</sub>): δ 7.96 (d, *J* = 8.5 Hz, 1H), 7.45-7.43 (m, 2H), 7.36-7.28 (m, 4H), 7.12 (d, *J* = 2.0 Hz, 1H), 4.76 (d, *J* = 14.1 Hz, 1H), 4.72

(d, *J* = 14.1 Hz, 1H), 4.54 (dd, *J* = 9.3, 6.3 Hz, 1H), 4.20 (q, *J* = 7.2 Hz, 2H), 3.19 (dd, *J* = 18.1, 9.6 Hz, 1H), 2.75 (dd, *J* = 18.1, 6.1 Hz, 1H), 1.31 (t, *J* = 7.2 Hz, 3H).

**<sup>13</sup>C NMR** (100 MHz, CDCl<sub>3</sub>): δ 177.1, 175.5, 165.8, 140.2, 138.9, 135.8, 132.9, 131.0, 128.9, 128.5, 128.2, 127.9, 127.3, 61.5, 45.5, 42.7, 37.5, 14.1.

**HRMS** calculated for C<sub>20</sub>H<sub>19</sub>NO<sub>4</sub> is [M+H]<sup>+</sup> : 372.1003; found: 372.1000.

**1-Isobutyl-3-(2-pivaloyl-5-(1*H*-pyrrolo[2,3-*b*]pyridin-1-yl)phenyl)pyrrolidine-2,5-dione (**3ue**):**

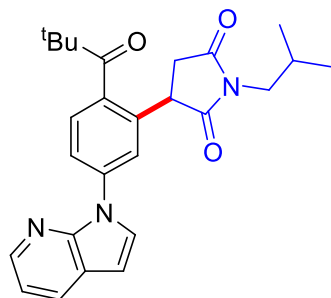

Compound **3ue** was prepared according to the general procedure **E** and the reaction was continued for 36 h. The crude reaction mixture was purified by flash column chromatography (EtOAc : hexane = 25 : 75) afforded 45.7 mg of **3ue** in 53 % yield as colourless liquid.

**<sup>1</sup>H NMR** (400 MHz, CDCl<sub>3</sub>): δ 8.34 (dd, *J* = 4.7, 1.5 Hz, 1H), 7.96 (dd, *J* = 7.8, 1.5 Hz, 1H), 7.80 (dd, *J* = 8.4, 2.1 Hz, 1H), 7.78 (d, *J* = 2.0 Hz, 1H), 7.68 (d, *J* = 8.4 Hz, 1H), 7.51 (d, *J* = 3.7 Hz, 1H), 7.15 (dd, *J* = 7.8, 4.7 Hz, 1H), 6.65 (d, *J* = 3.7 Hz, 1H), 4.09 (dd, *J* = 9.5, 5.8 Hz, 1H), 3.44-3.36 (m, 2H), 3.22 (dd, *J* = 18.3, 9.6 Hz, 1H), 2.93 (dd, *J* = 18.3, 5.8 Hz, 1H), 2.14-2.06 (m, 1H), 1.36 (s, 9H), 0.93 (d, *J* = 6.7 Hz, 6H).

**<sup>13</sup>C NMR** (100 MHz, CDCl<sub>3</sub>): δ 212.3, 177.8, 176.0, 147.4, 143.7, 140.0, 137.4, 136.7, 129.2, 127.6, 126.7, 123.7, 121.8, 120.9, 117.2, 102.8, 44.3, 44.8, 44.6, 38.4, 28.0, 27.0, 20.1, 20.0.

**HRMS** calculated for C<sub>26</sub>H<sub>30</sub>N<sub>3</sub>O<sub>3</sub> is [M+H]<sup>+</sup> : 432.2287; found: 432.2282.

### 3. Control Experiments:

#### 3.1. Competitive experiment with *p*-substituted ketone:

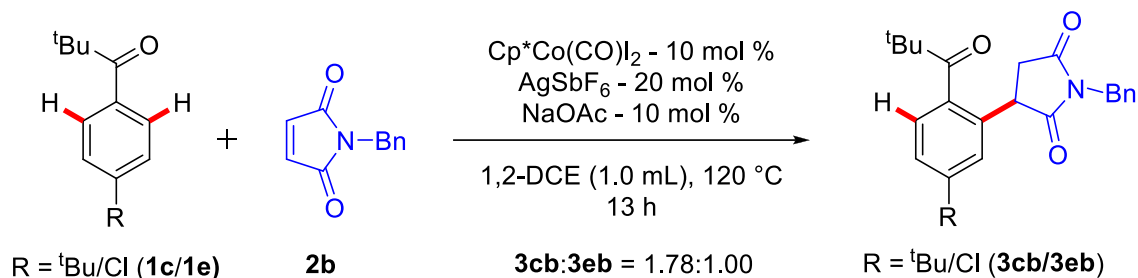

An oven-dried Schlenk tube equipped with a magnetic stir bar was charged with  $\text{Cp}^*\text{Co}(\text{CO})\text{I}_2$  (4.5 mg, 0.01 mmol, 10 mol %),  $\text{AgSbF}_6$  (7.0 mg, 0.02 mmol, 20 mol %),  $\text{NaOAc}$  (0.8 mg, 0.01 mmol, 10 mol %) under argon atmosphere. Small amount of 1,2-DCE (0.2 mL) was added to the Schlenk tube and stirred for few minutes. 1-(4-*tert*-butylphenyl)-2,2-dimethylpropan-1-one **1c** (21.8 mg, 0.1 mmol, 1.0 equiv.), 1-(4-chlorophenyl)-2,2-dimethylpropan-1-one **1e** (19.6 mg, 0.1 mmol, 1.0 equiv) and 1-benzyl-1*H*-pyrrole-2,5-dione **2b** (28.0 mg, 0.15 mmol, 1.5 equiv.) followed by 0.8 mL 1,2-DCE were successively added to the Schlenk tube. The closed tube was placed to a pre-heated oil bath at 120 °C for 13 h. After completion of the reaction, the reaction mixture was then allowed to cool down to room temperature. The crude mixture was purified by flash column chromatography (10/90; EtOAc/Hexane) on silica gel afforded mixture of **3cb** and **3eb**. The ratio of **3cb** and **3eb** (**3cb:3eb** = 1.78:1.00) was calculated from  $^1\text{H}$  NMR analysis.

#### 3.2. H/D exchange experiments:

##### 3.2.1. H/D exchange with ketone:

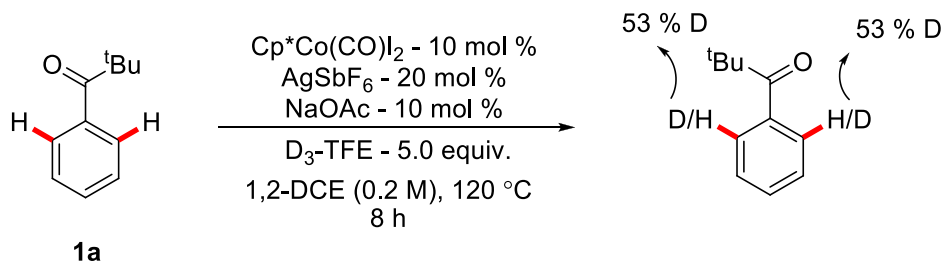

An oven-dried Schlenk tube equipped with a magnetic stir bar was charged with  $\text{Cp}^*\text{Co}(\text{CO})\text{I}_2$  (9.5 mg, 0.02 mmol, 10 mol %),  $\text{AgSbF}_6$  (14.0 mg, 0.04 mmol, 20 mol %),  $\text{NaOAc}$  (1.6 mg, 0.02 mmol, 10 mol %) under argon atmosphere. Small amount of 1,2-DCE (0.2 mL) was added to

the Schlenk tube and stirred for few minutes. 2,2-Dimethyl-1-phenylpropan-1-one **1a** (32.4 mg, 0.2 mmol, 1.0 equiv.) and D<sub>3</sub>-TFE (0.073 mL, 1.0 mmol, 5.0 equiv.) followed by 0.8 mL 1,2-DCE were successively added to the Schlenk tube. The closed Schlenk tube was placed to a pre-heated oil bath at 120 °C for 8 h. After that, the reaction mixture was then allowed to cool down to room temperature. Then the reaction mixture was passed through a short pad of silica gel (eluent 5 % EtOAc/Hexane). The <sup>1</sup>H NMR of the isolated product shows deuterium incorporation of about 53 % in ortho position with respect to carbonyl of **1a**.

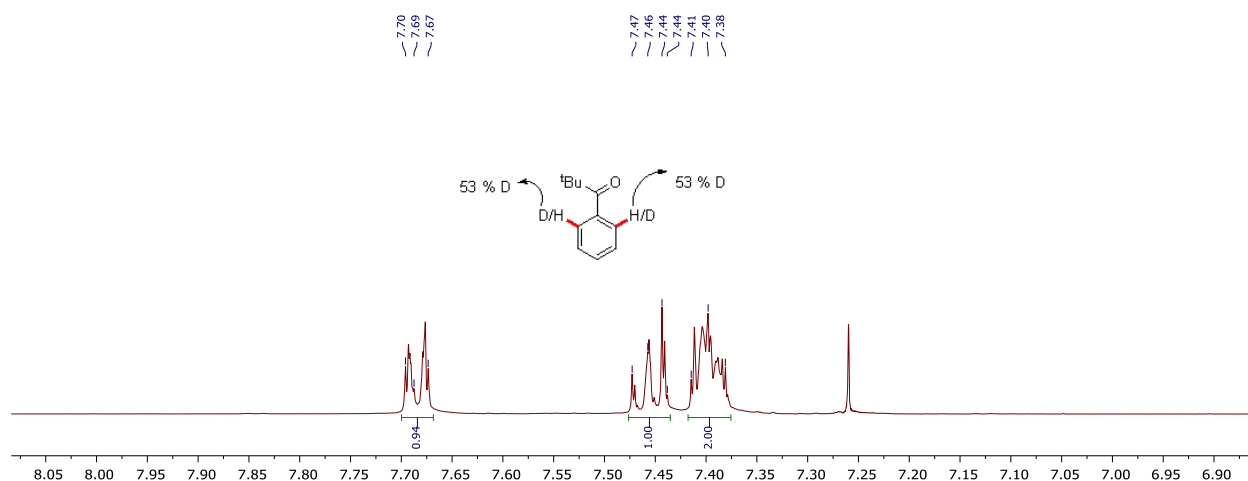

### 3.2.2. H/D exchange in the the product as well as with ketone (**1a**):

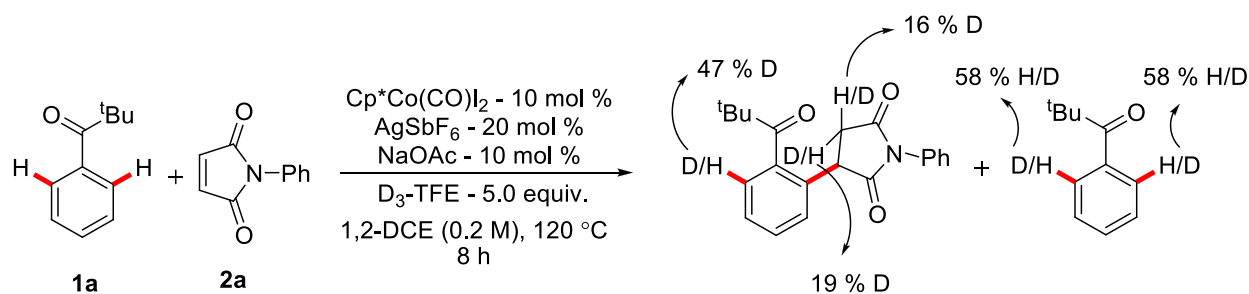

An oven-dried Schlenk tube equipped with a magnetic stir bar was charged with Cp\*Co(CO)I<sub>2</sub> (9.5 mg, 0.02 mmol, 10 mol %), AgSbF<sub>6</sub> (14.0 mg, 0.04 mmol, 20 mol %), NaOAc (16.0 mg, 0.02 mmol, 10 mol %) under argon atmosphere. Small amount of 1,2-DCE (0.2 mL) was added to the Schlenk tube and stirred for few minutes. 2,2-Dimethyl-1-phenylpropan-1-one **1a** (32.4 mg, 0.2 mmol, 1.0 equiv.), 1-phenyl-1*H*-pyrrole-2,5-dione **2a** (51.9 mg, 0.3 mmol,

1.5 equiv.) and D<sub>3</sub>-TFE (0.073 mL, 1.0 mmol, 5.0 equiv.) followed by 0.8 mL 1,2-DCE were successively added to the Schlenk. The closed tube was placed to a pre-heated oil bath at 120 °C for 8 h. After completion of the reaction, the reaction mixture was then allowed to cool down to room temperature. The crude mixture was purified by flash column chromatography (10/90; EtOAc/Hexane) on silica gel afforded 48.6 mg (72 % yield) of **3aa** and 7.2 mg (22 % yield) of **1a**.

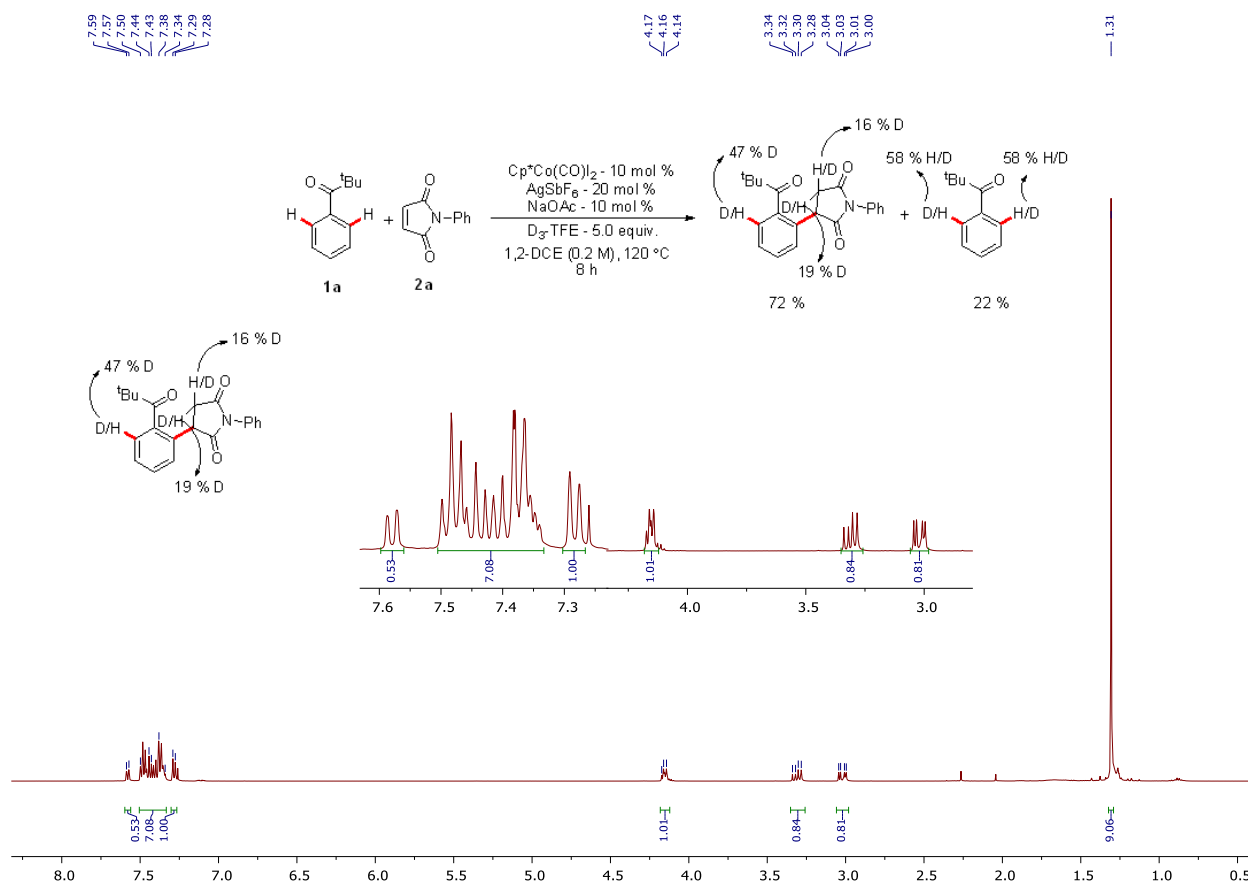

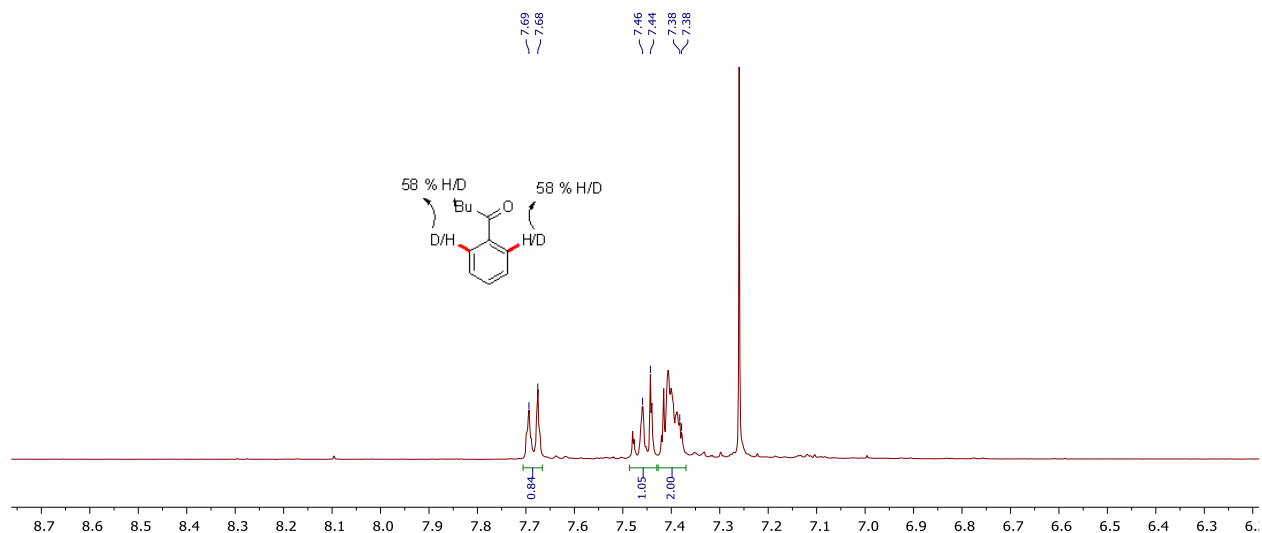

The  $^1\text{H}$  NMR of the isolated product **3aa** shows deuterium incorporation of about 47 % in ortho position with respect to ketone and 19 %, 16 % D incorporation occurs to the methylene carbon of succinimide. Also 58 % D incorporation observed in the ortho position with respect to carbonyl of **1a**.

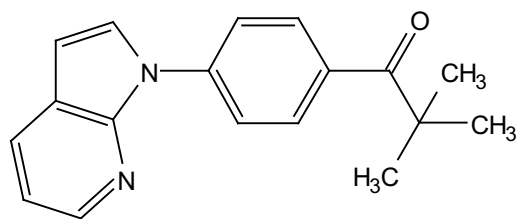

1u

8.40  
8.40  
8.39  
8.39  
7.99  
7.97  
7.95  
7.94  
7.92  
7.91  
7.89  
7.57  
7.56  
7.18  
7.17  
7.16  
7.15  
6.68  
6.67

1.41

1.02

3.26  
2.23

1.08

1.11

1.00

9.28

9.5 9.0 8.5 8.0 7.5 7.0 6.5 6.0 5.5 5.0 4.5 4.0 3.5 3.0 2.5 2.0 1.5 1.0 0.5 0.0

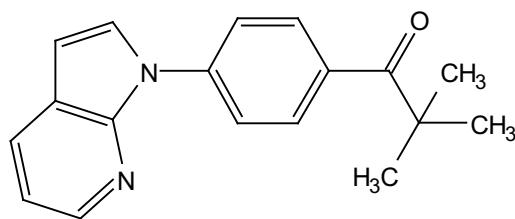

1u

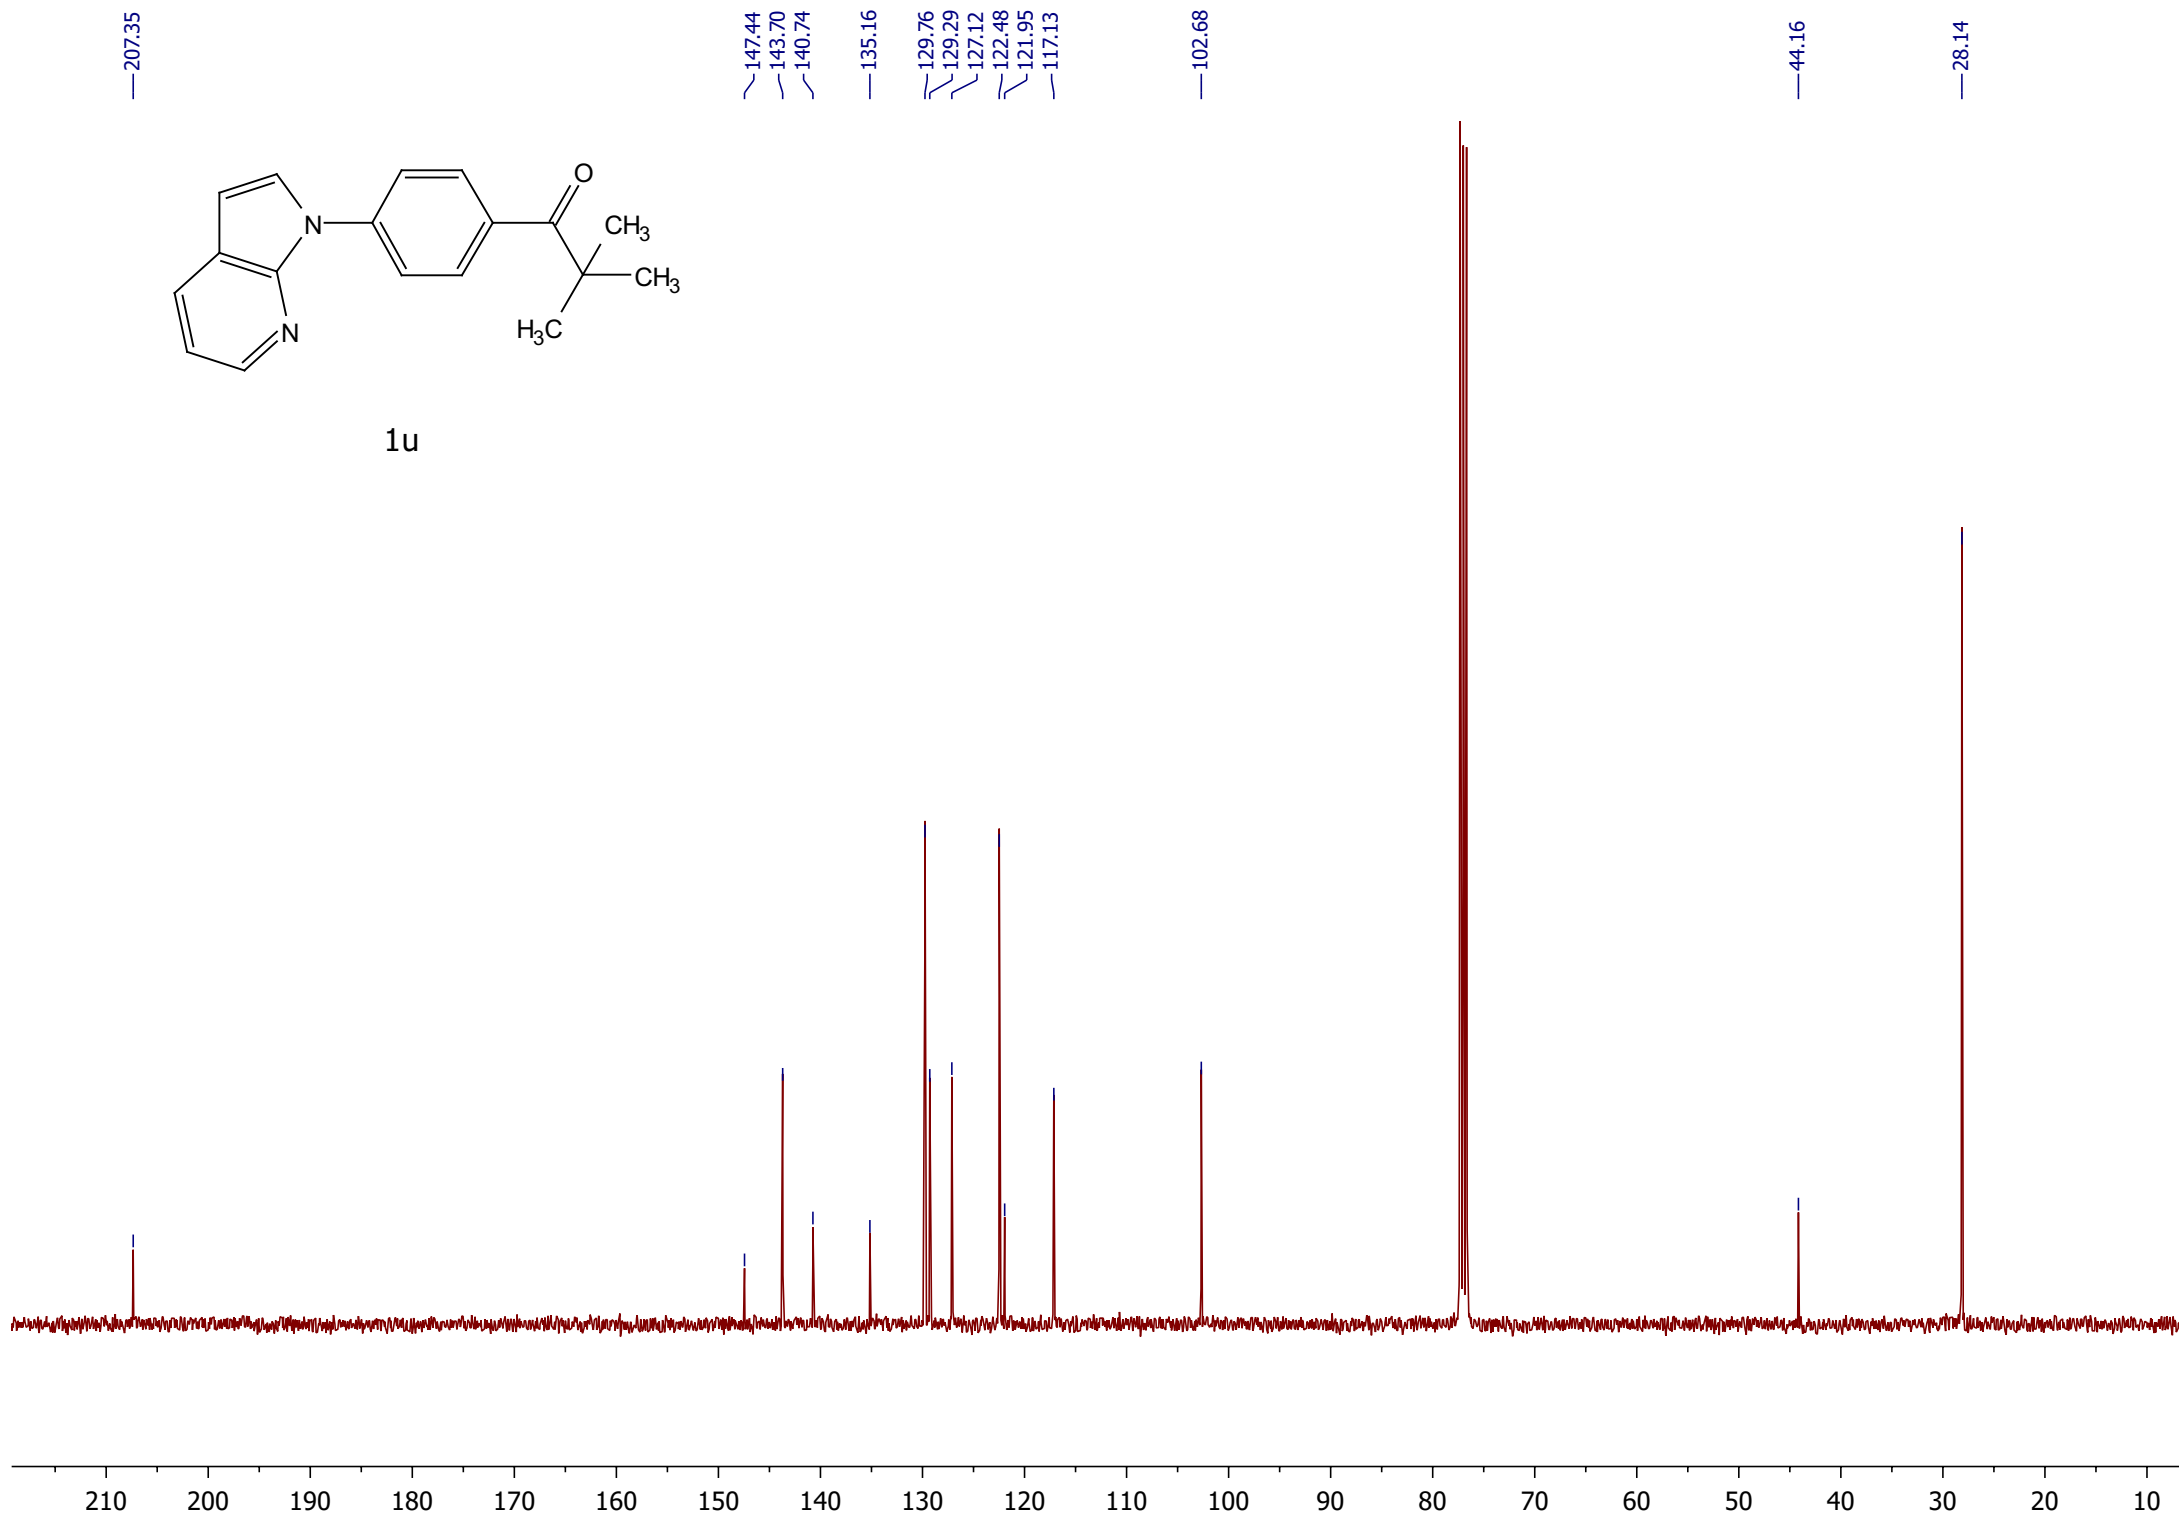

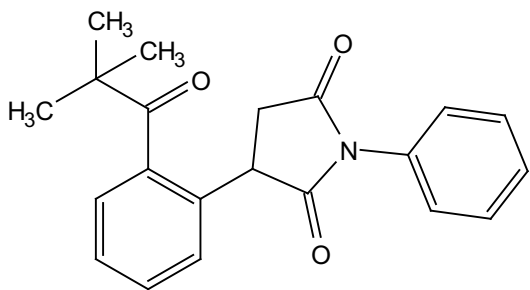

3aa

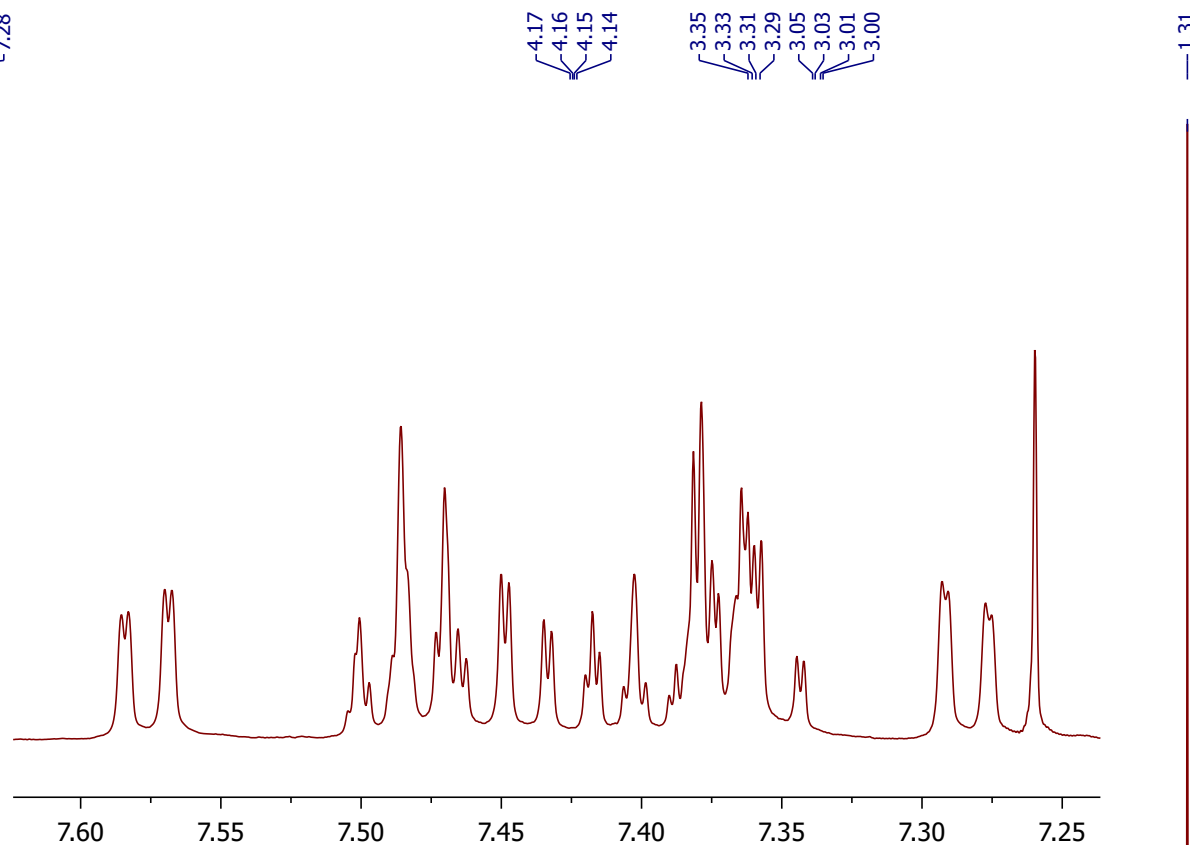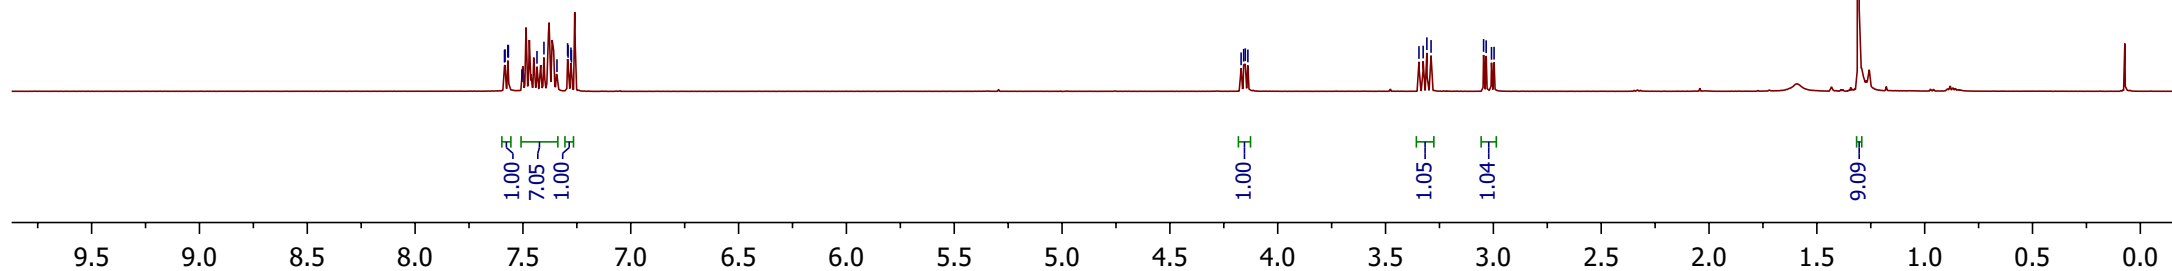

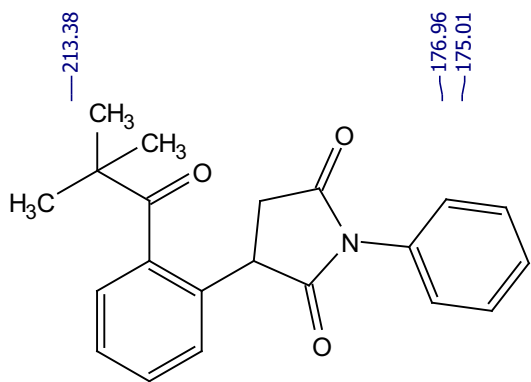

3a

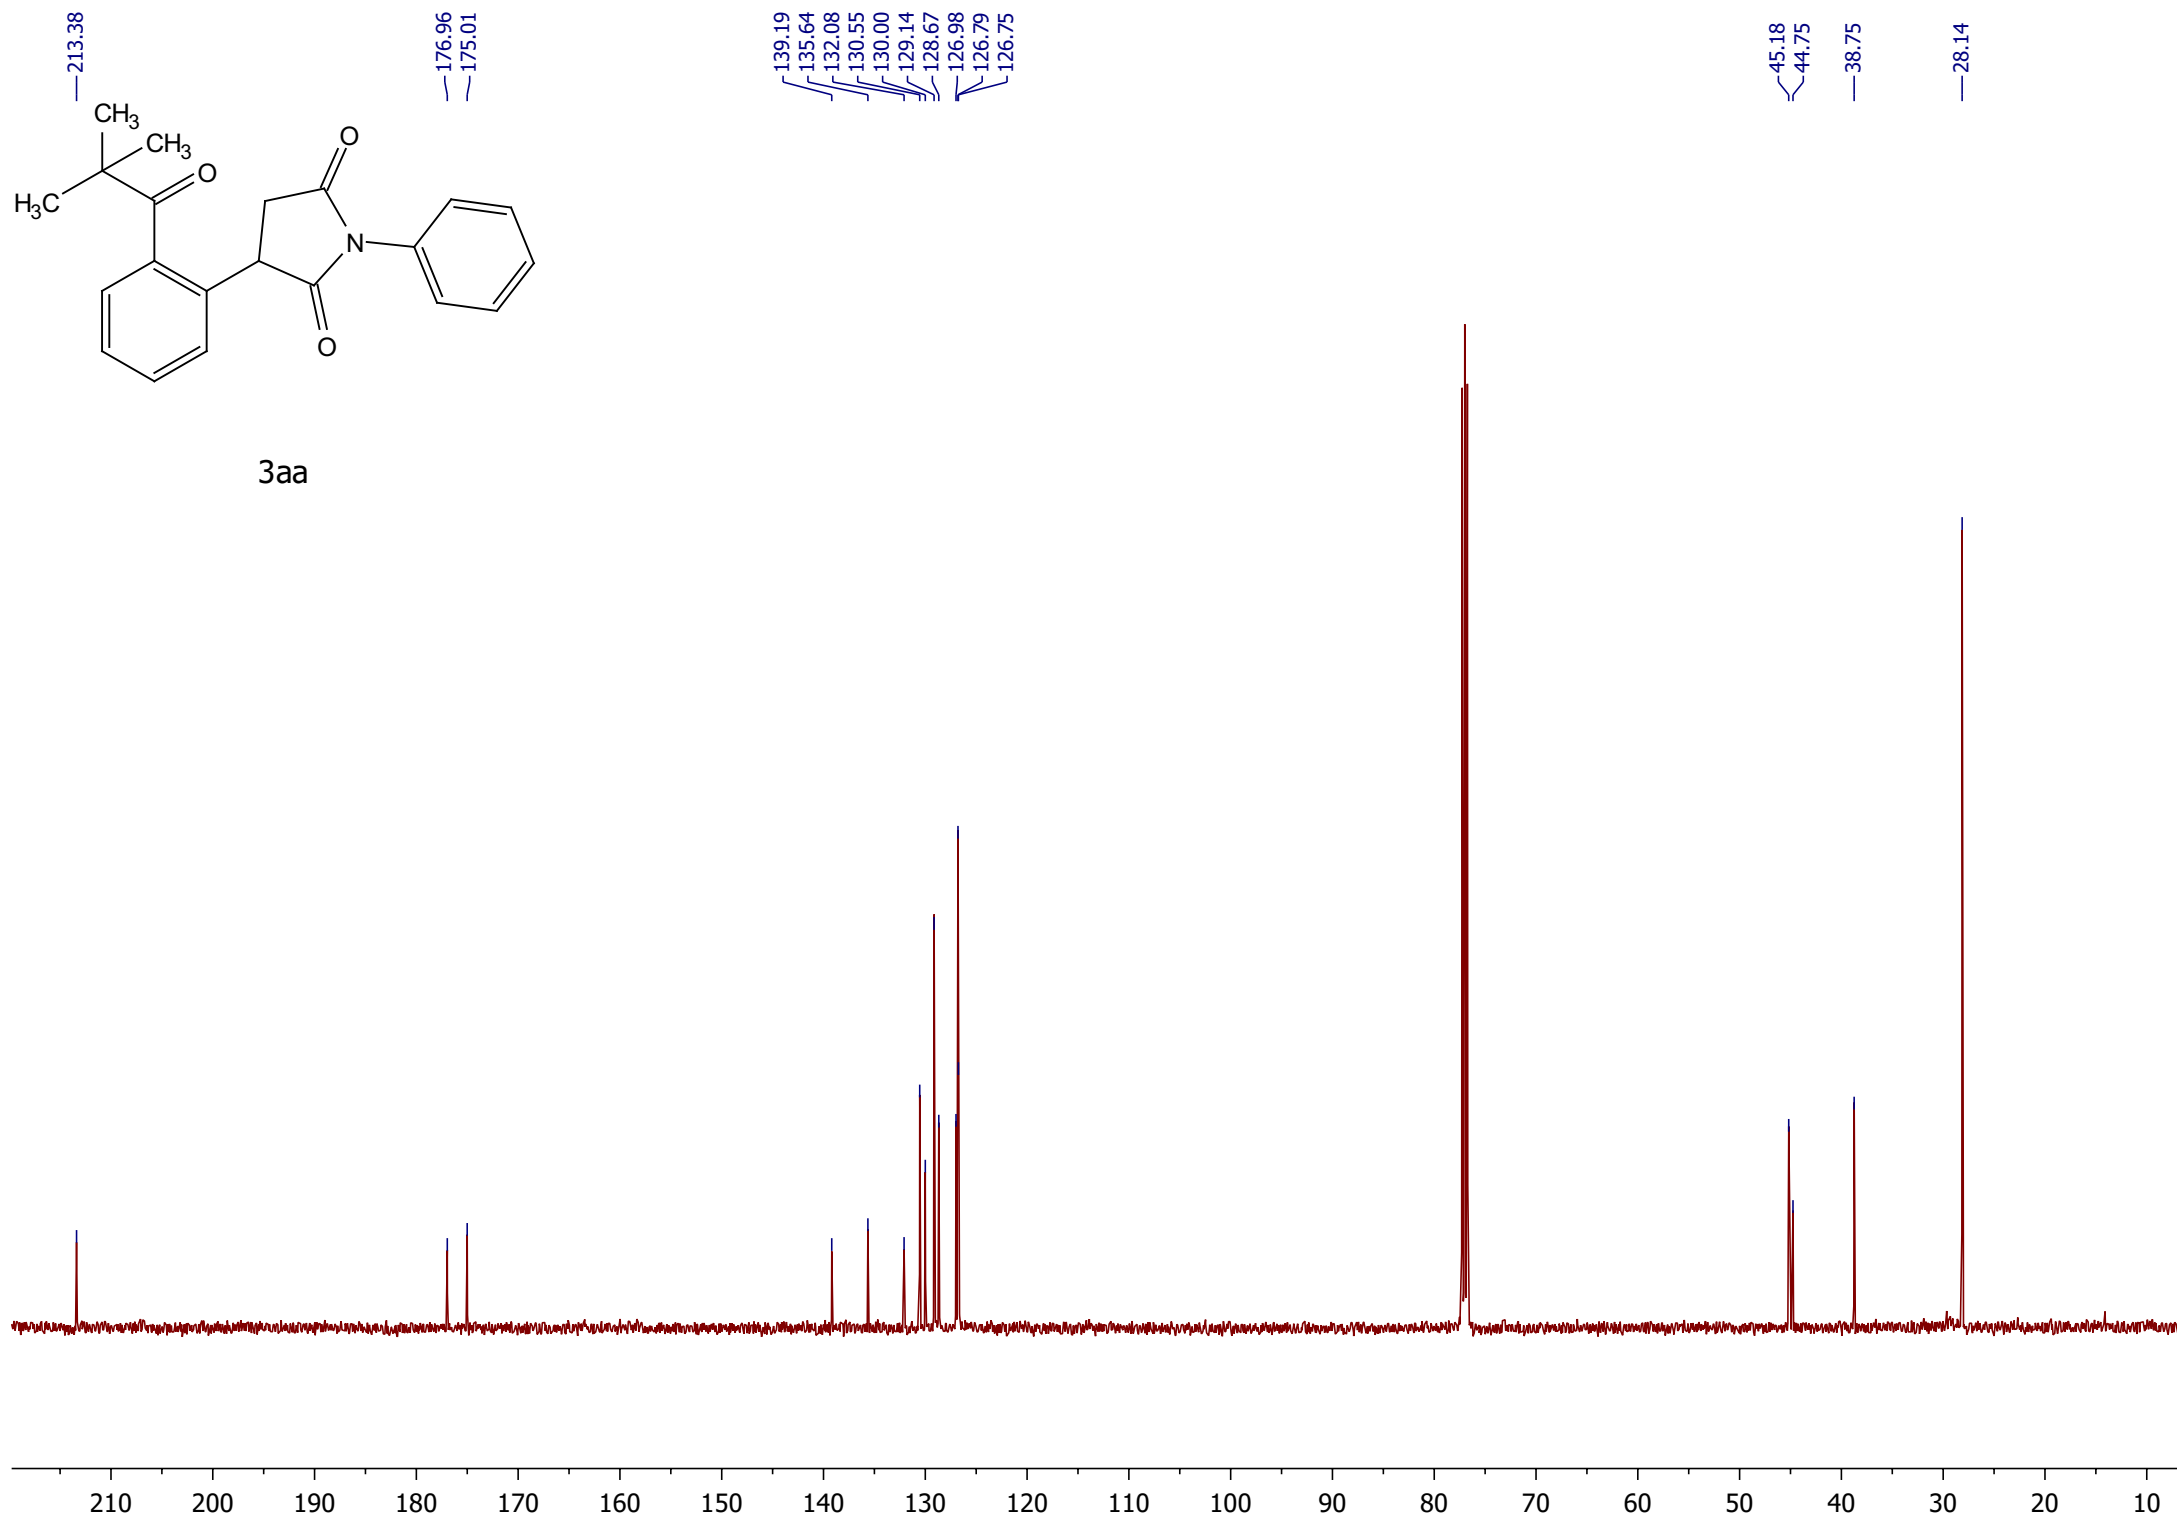

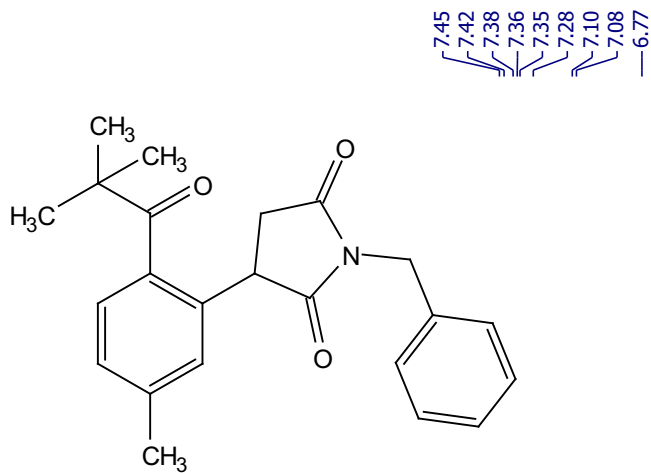

3b

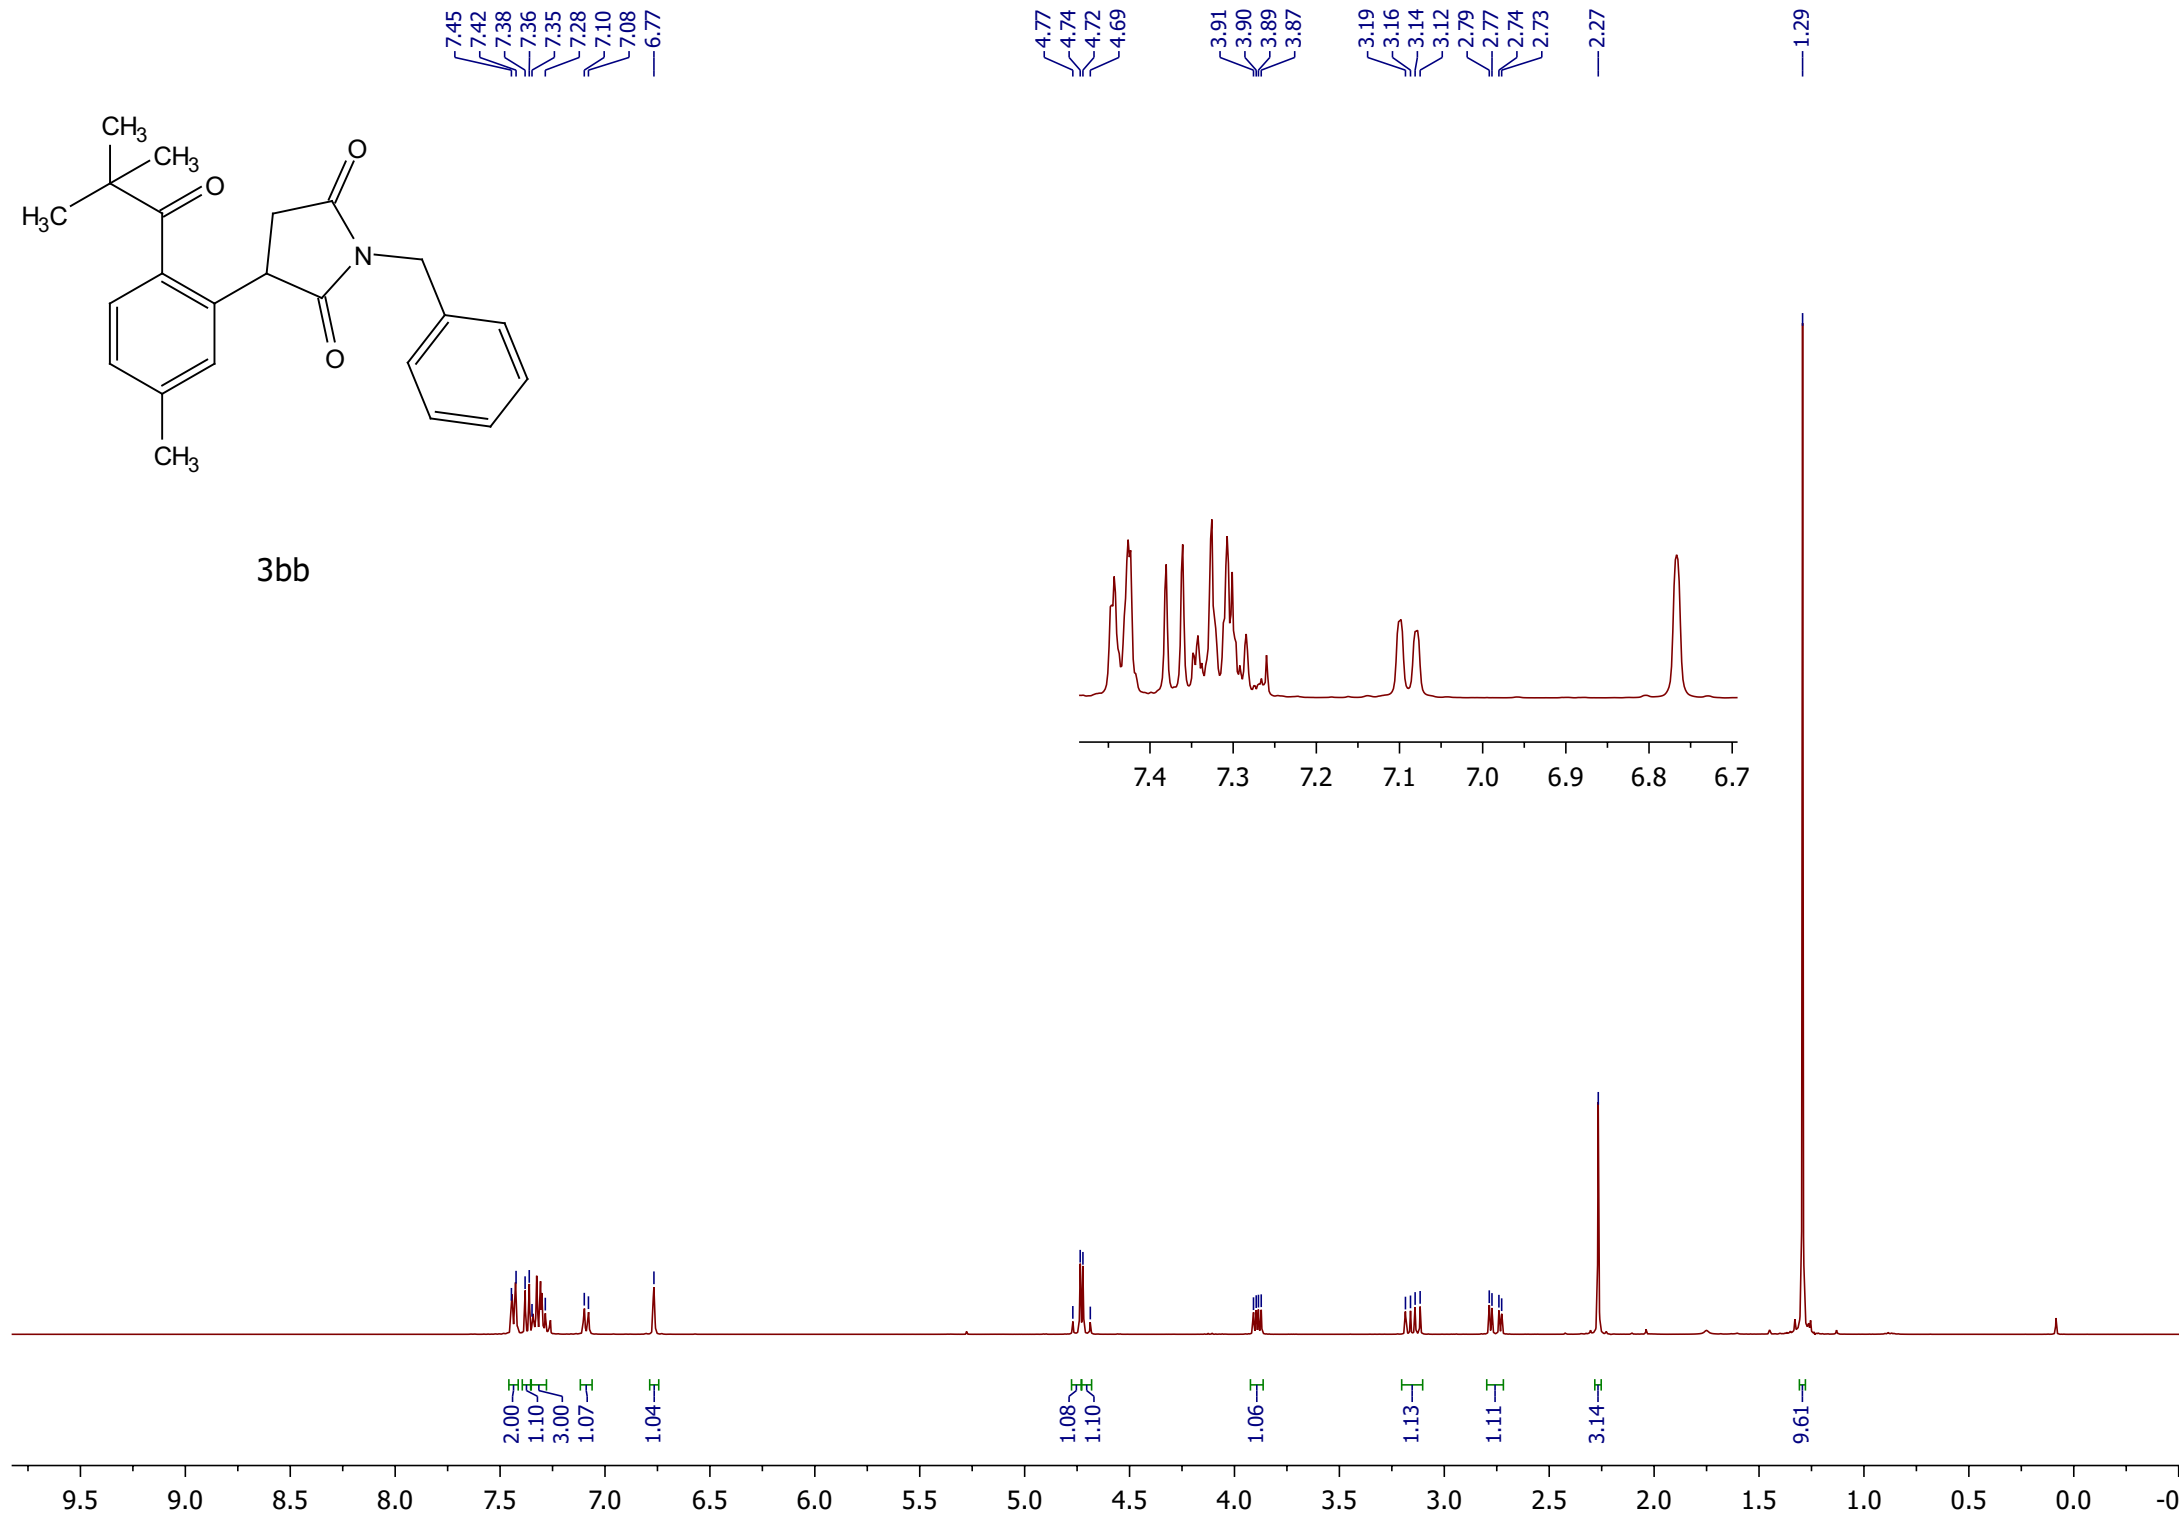

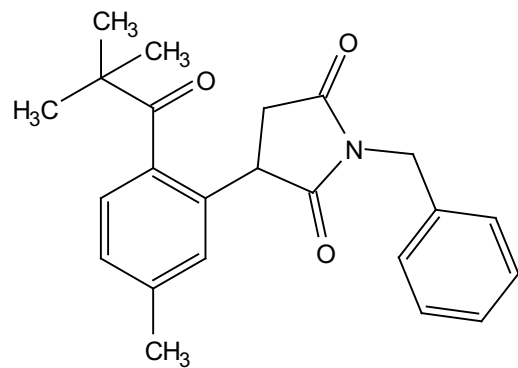

3bb

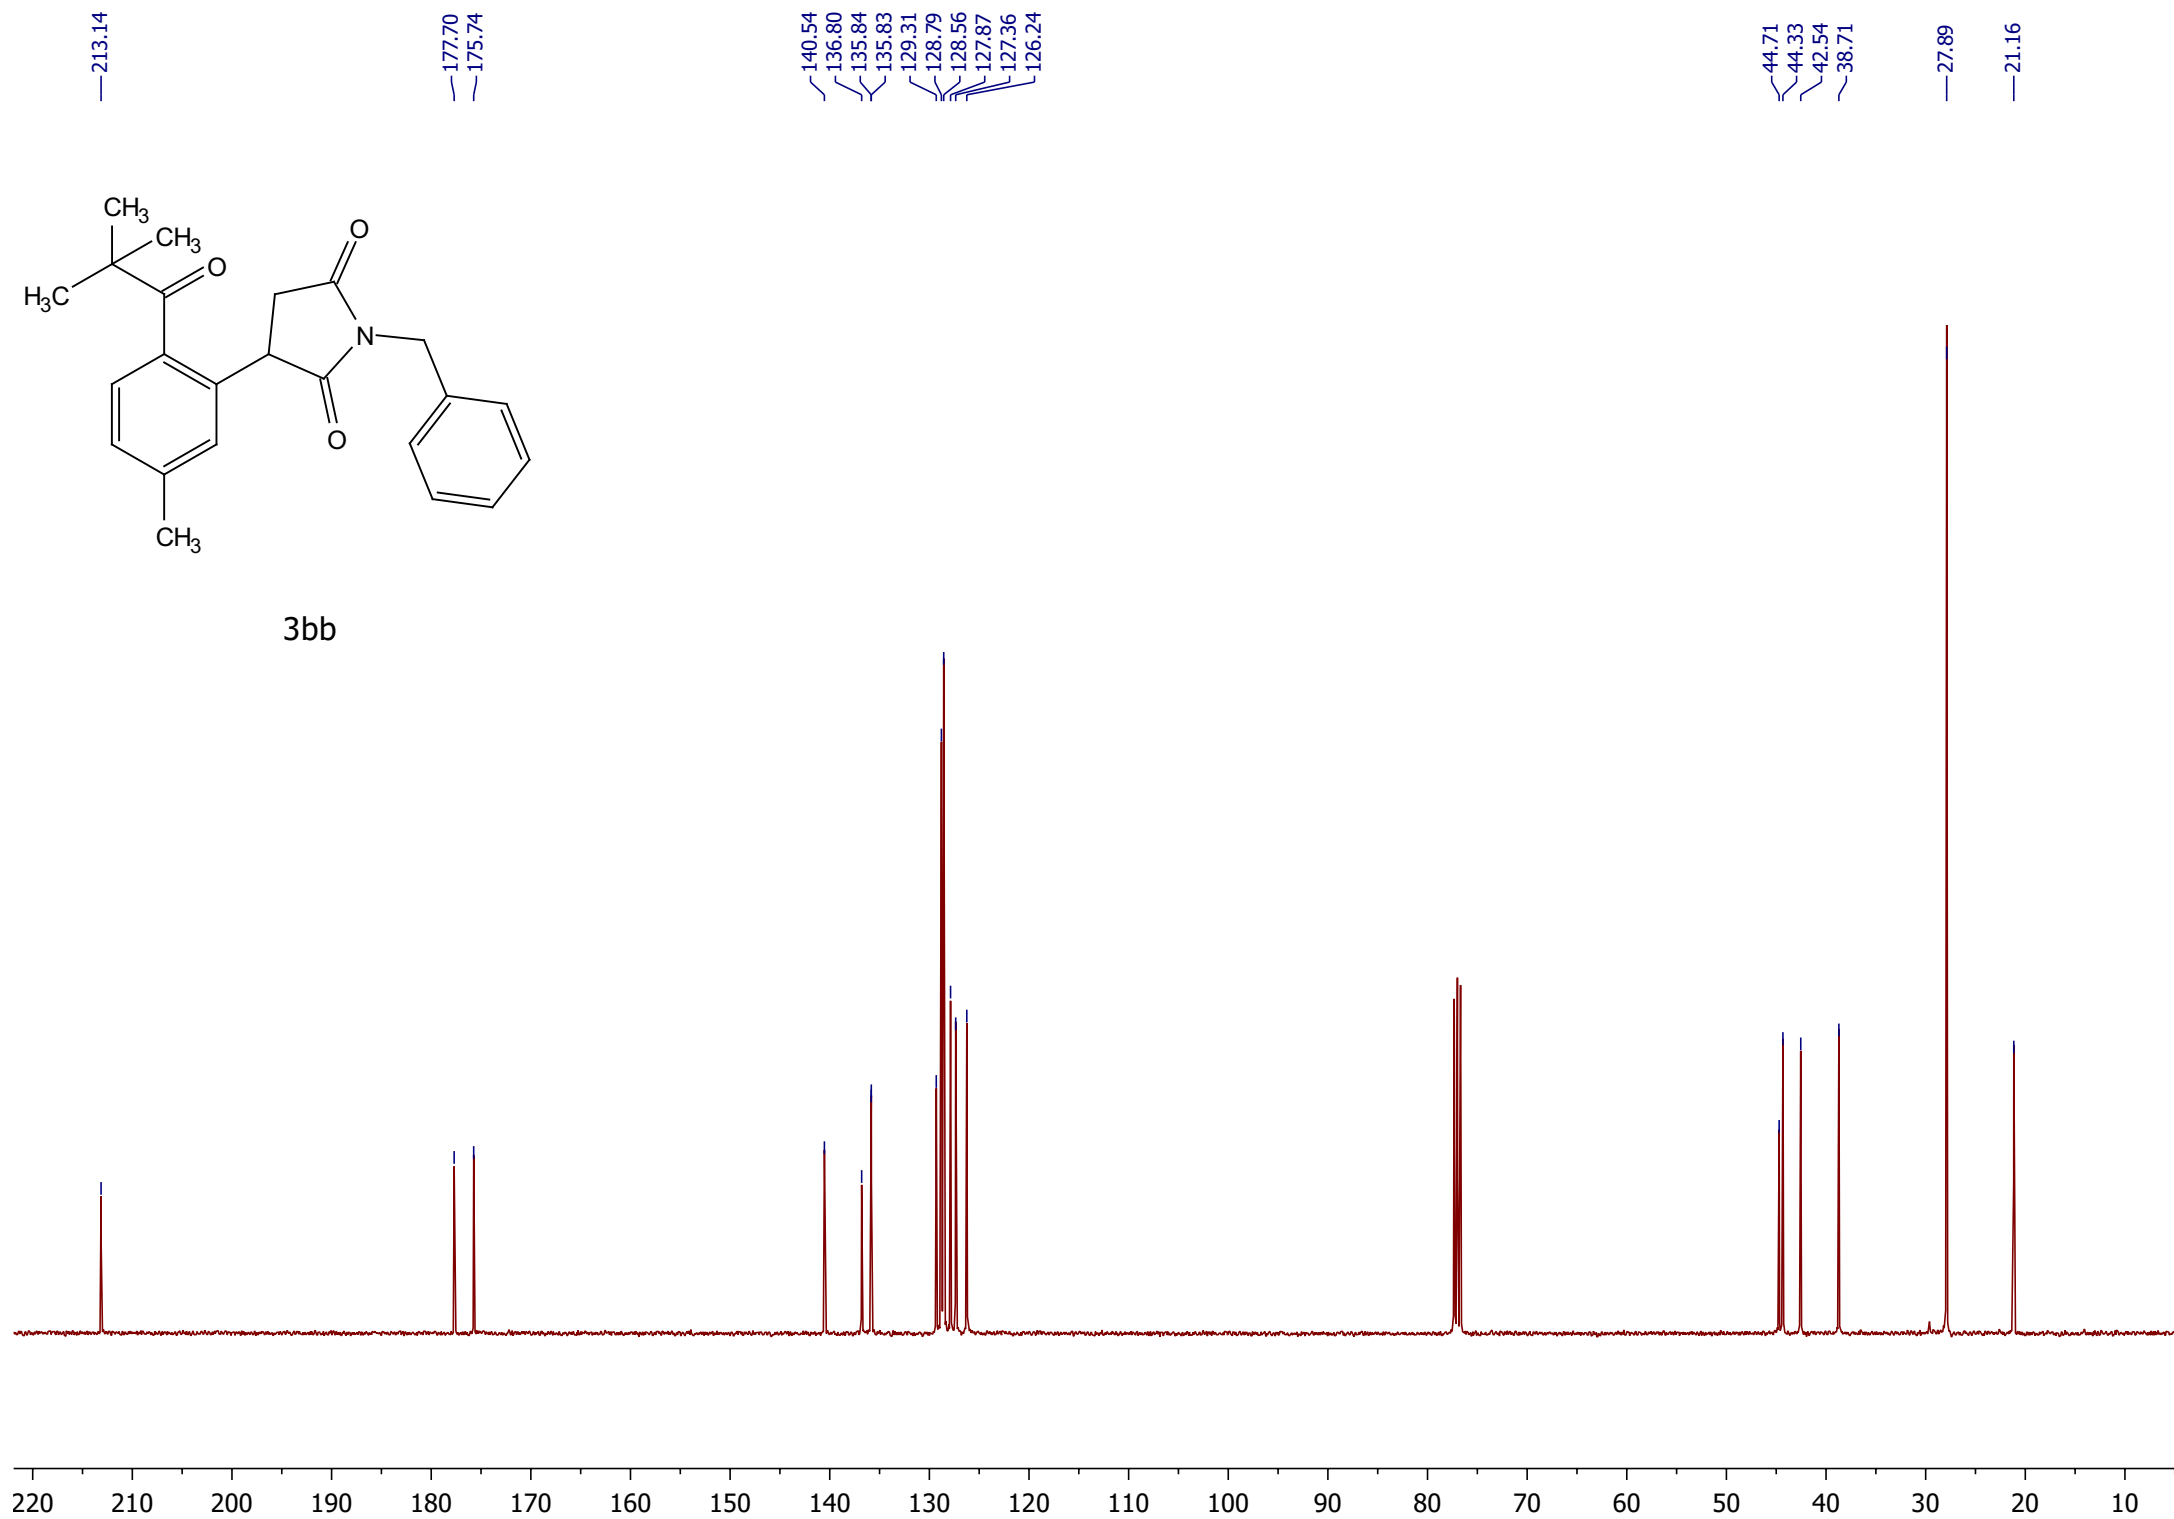

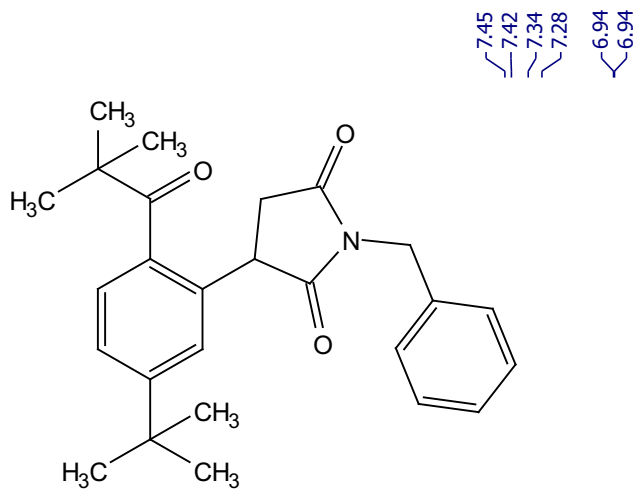

3cb

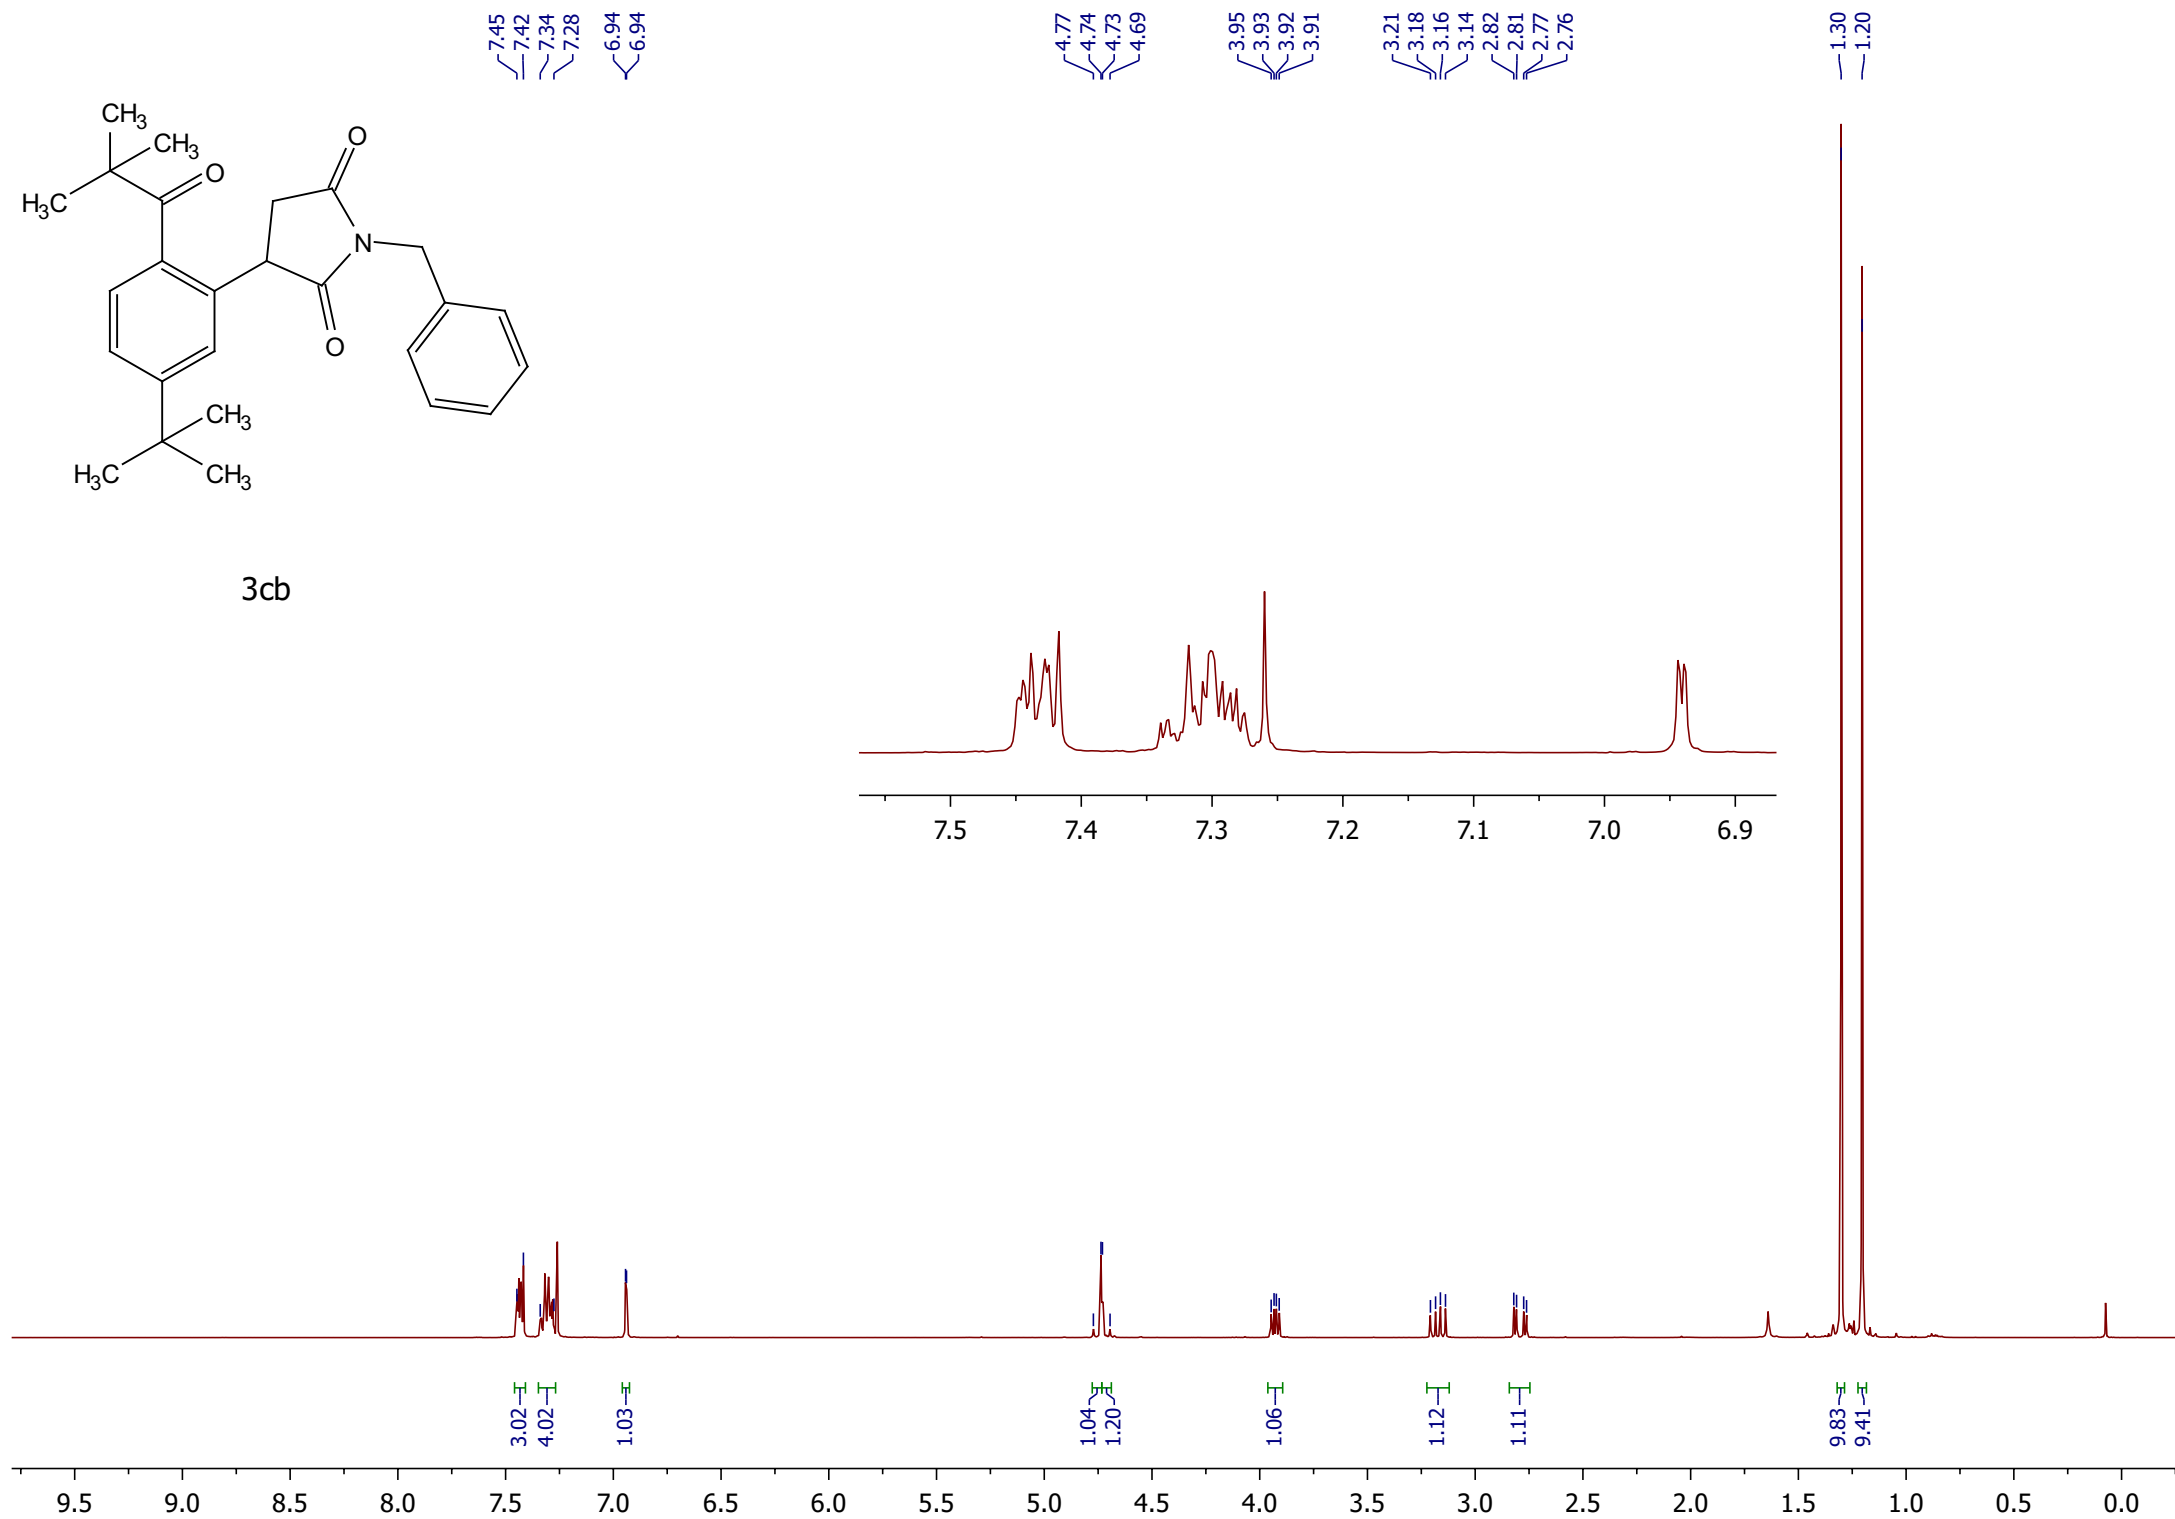

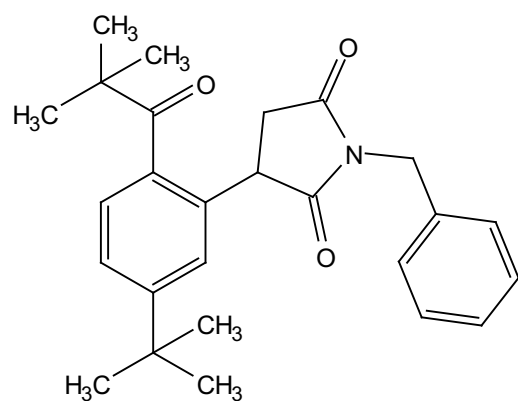

3b

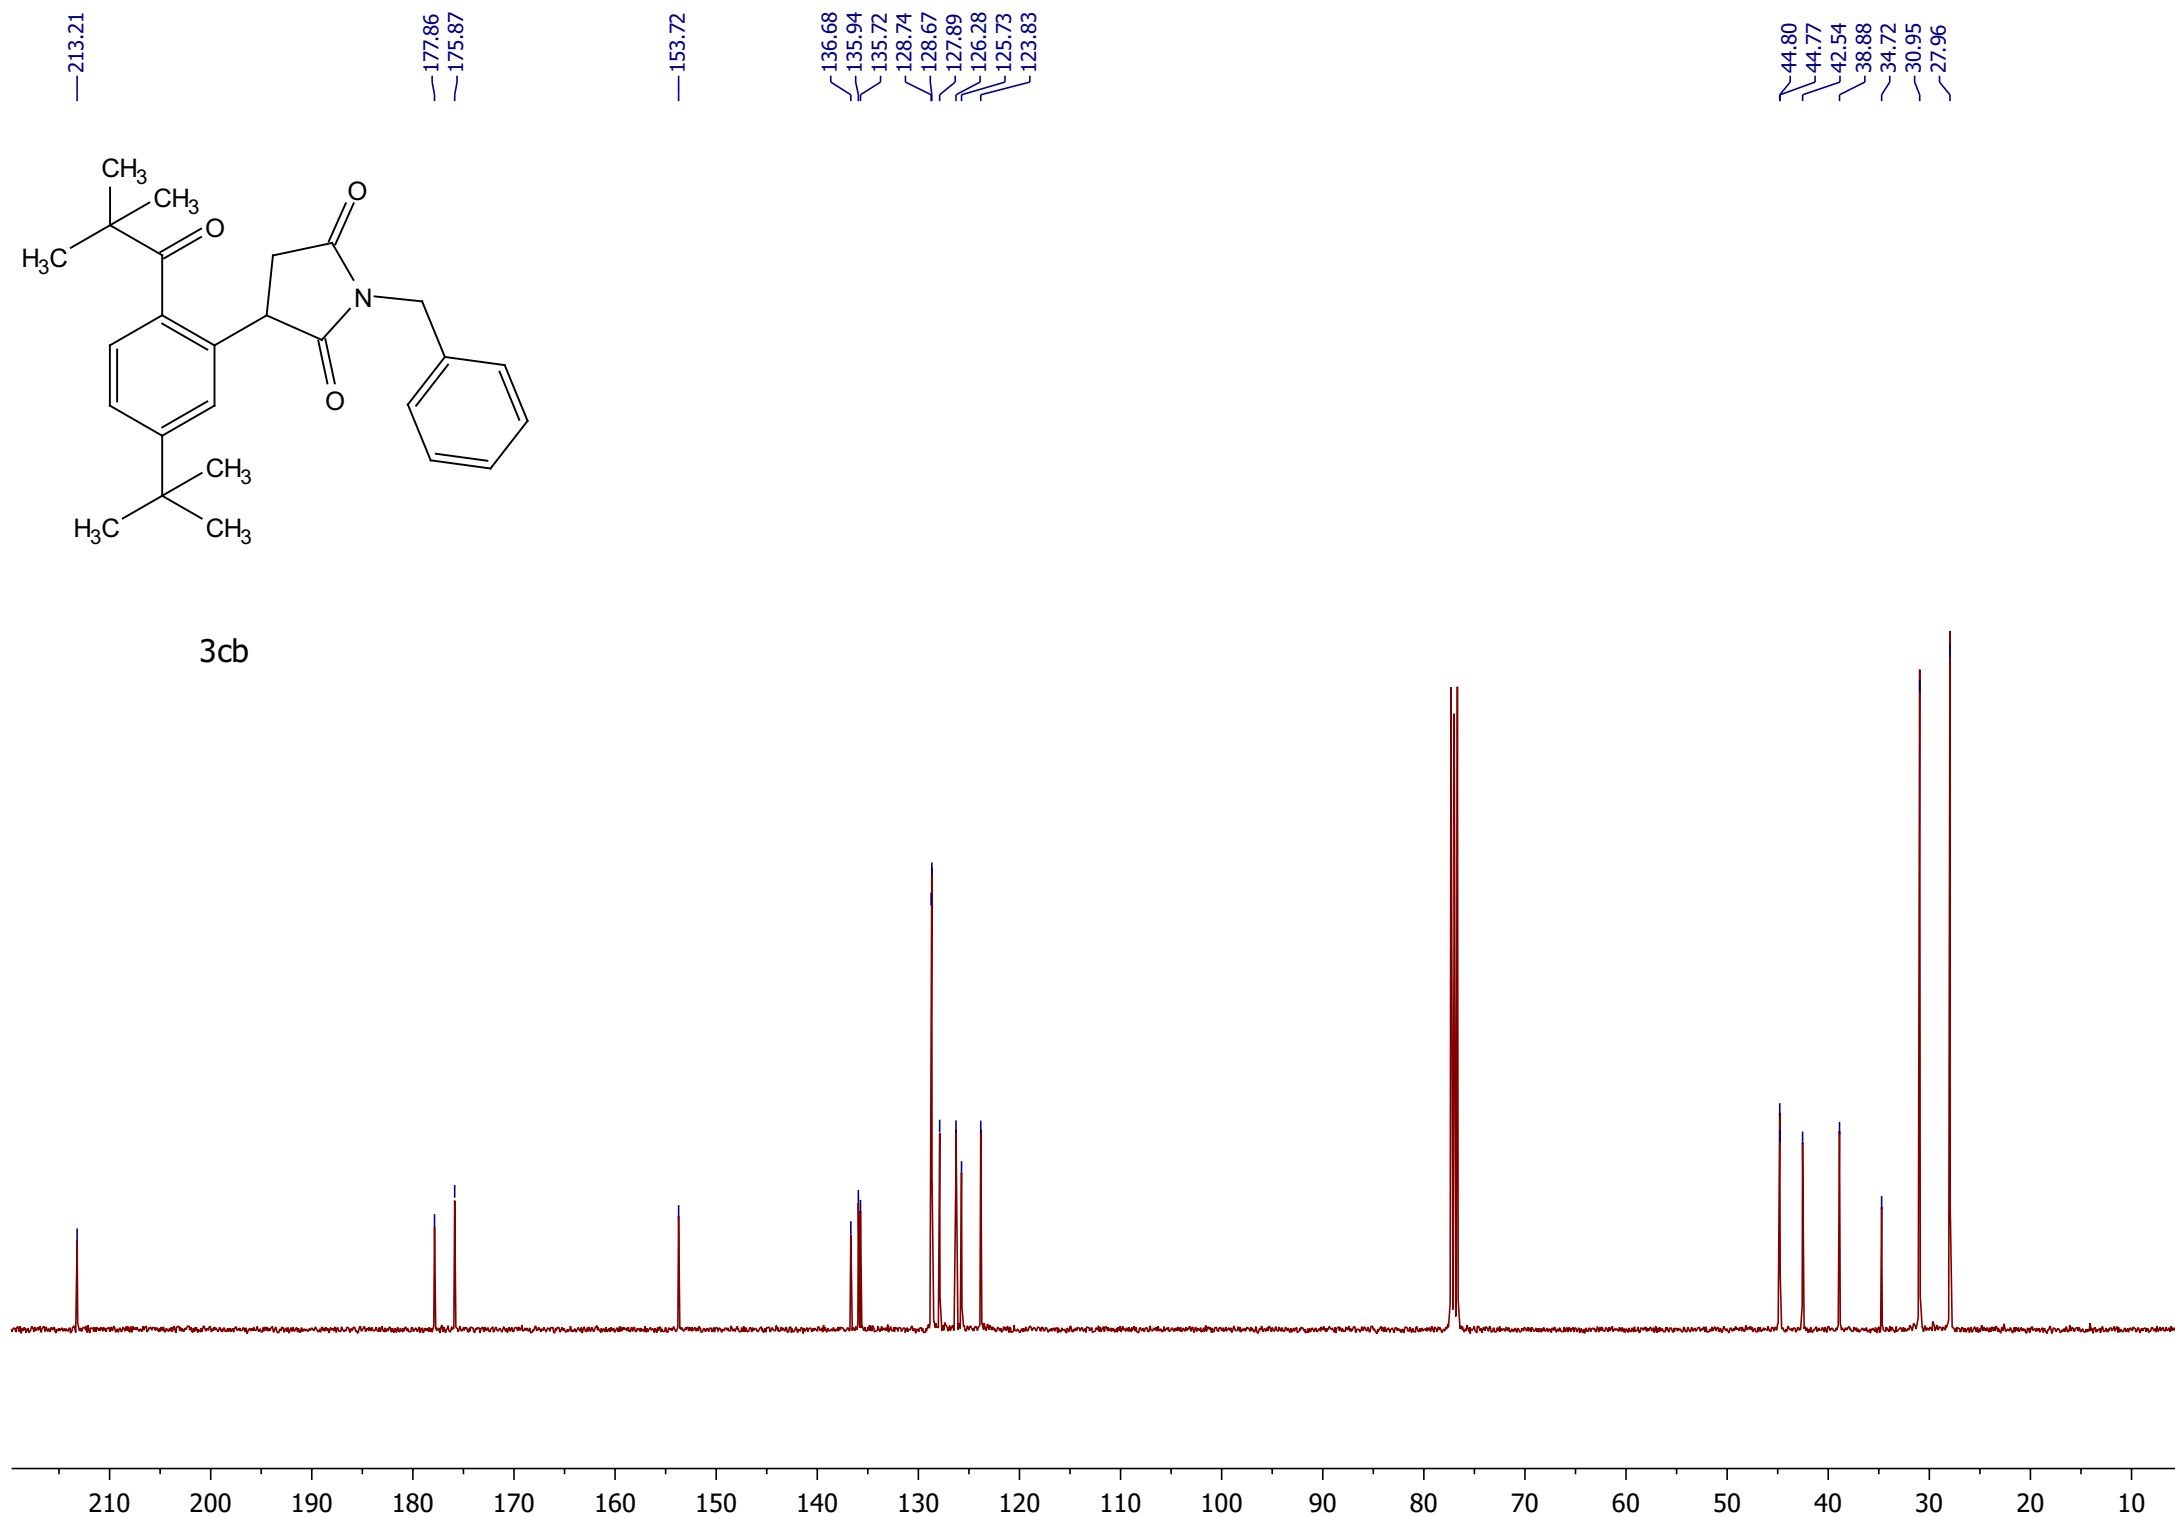

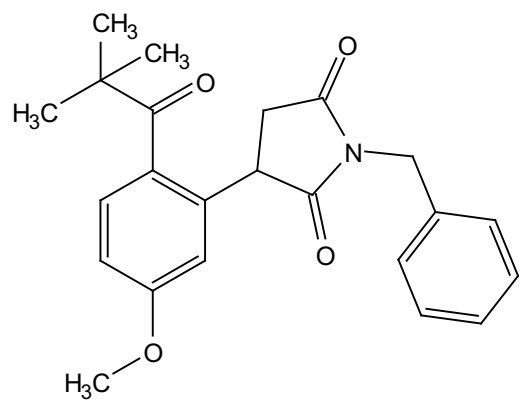

3db

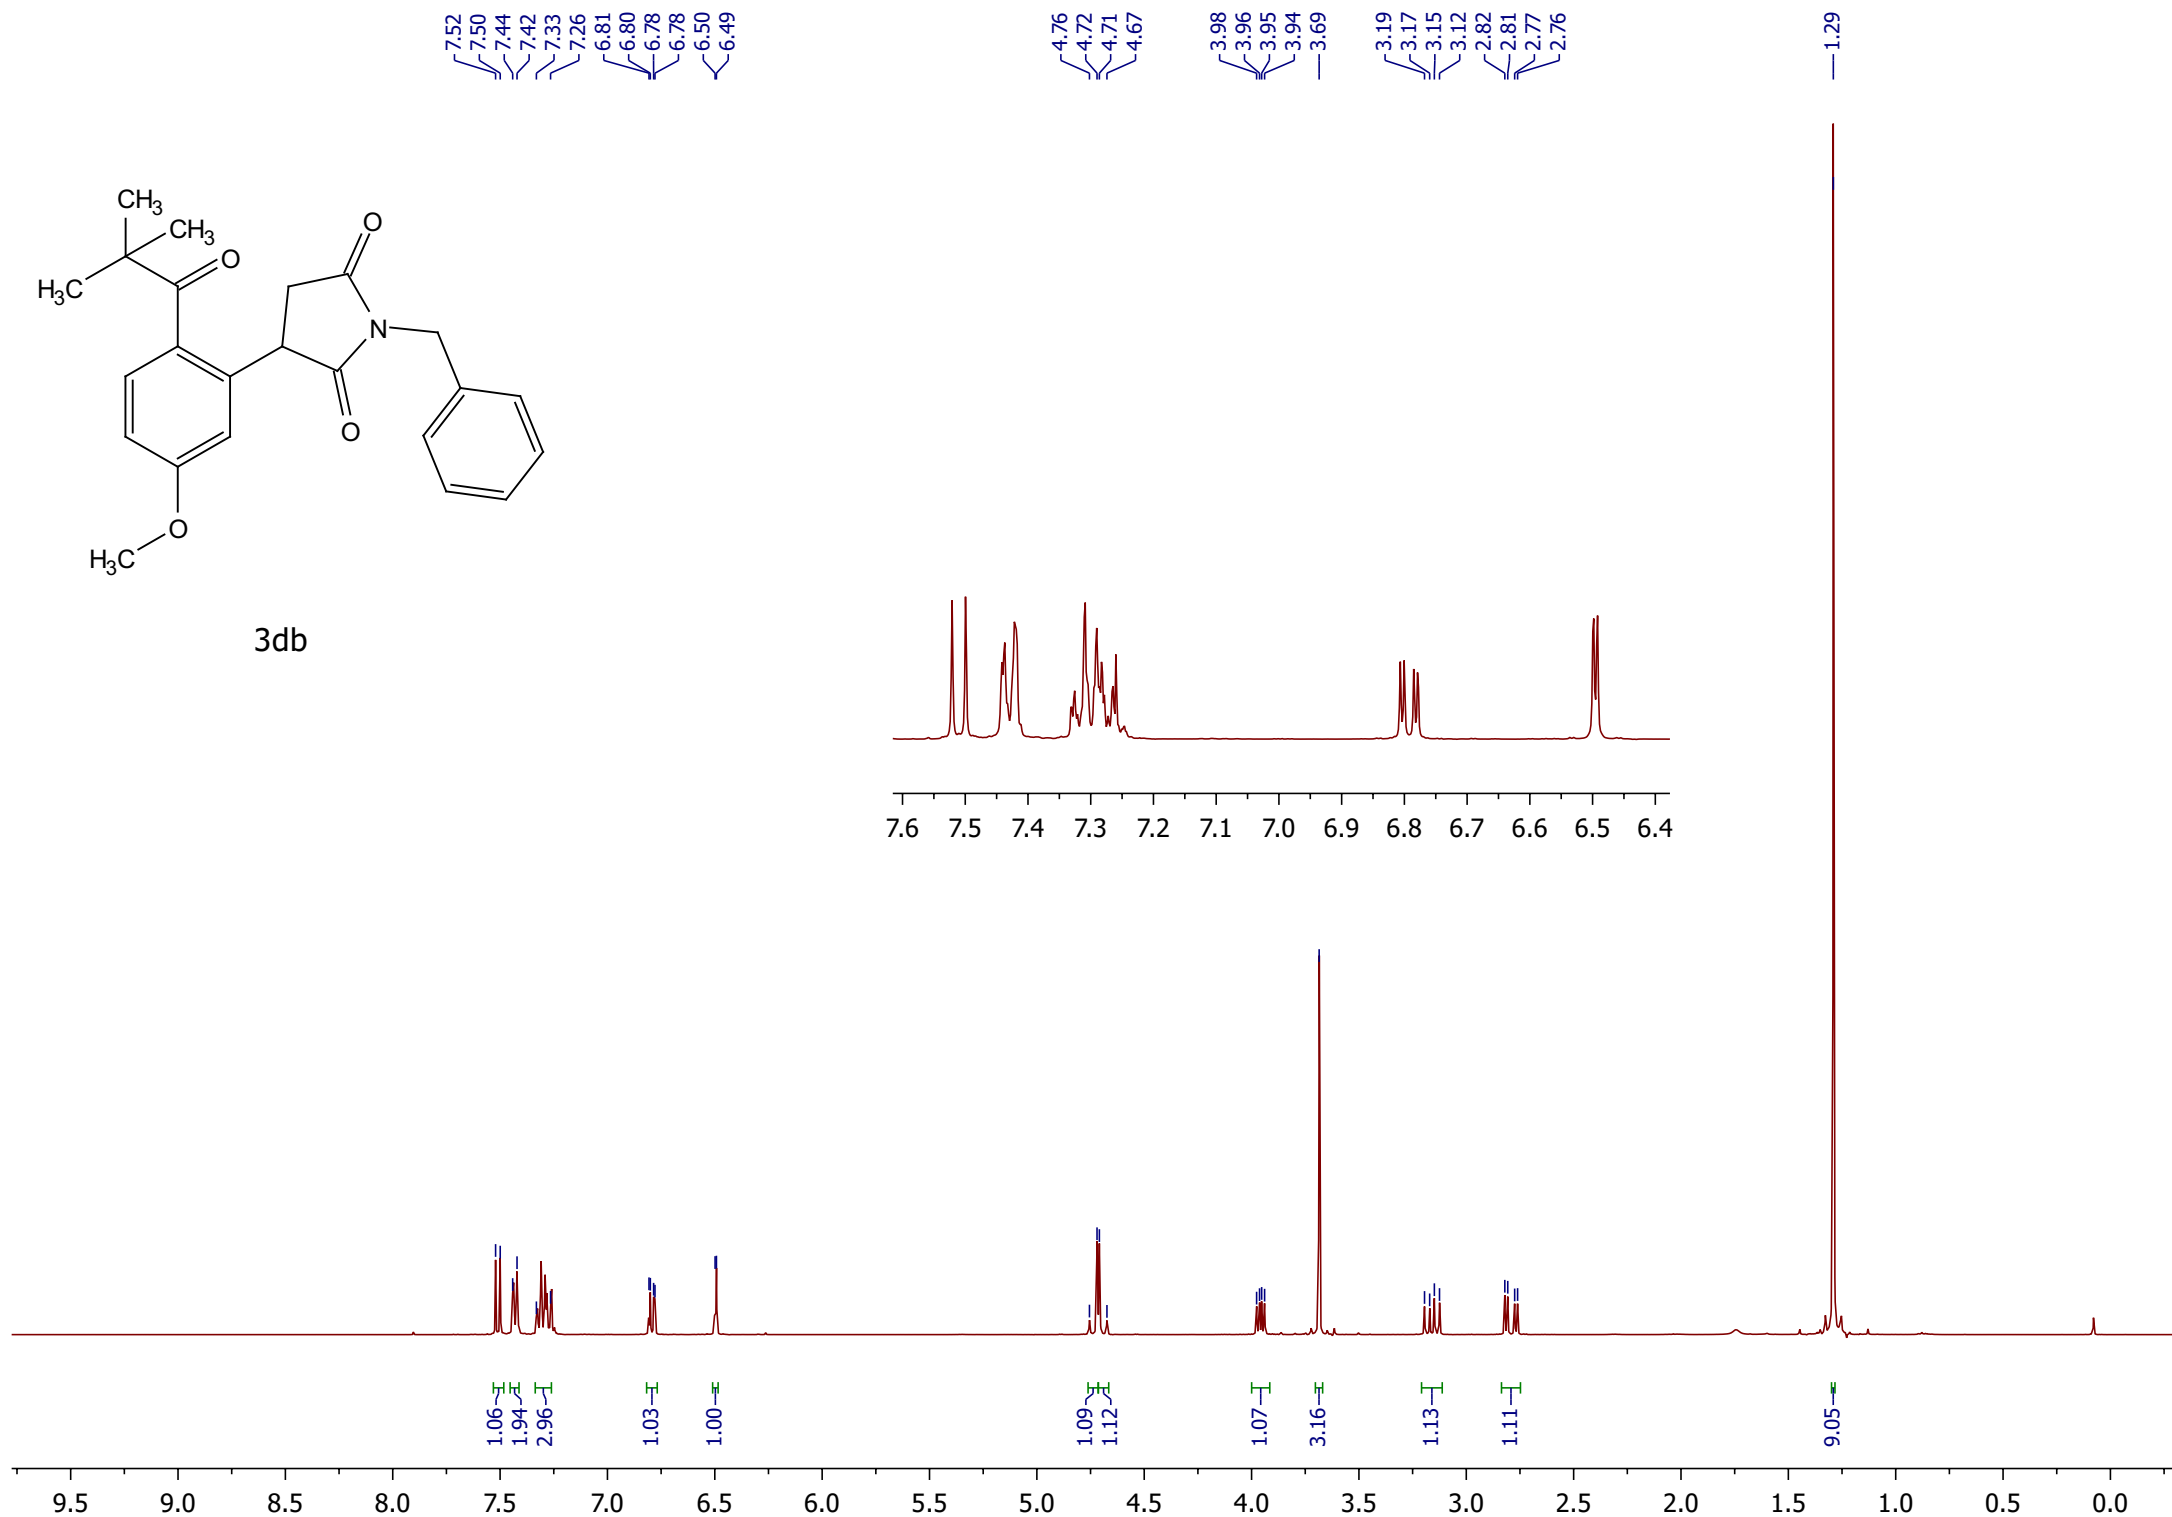

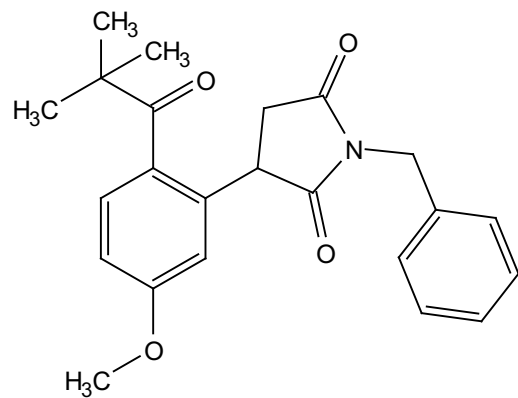

3db

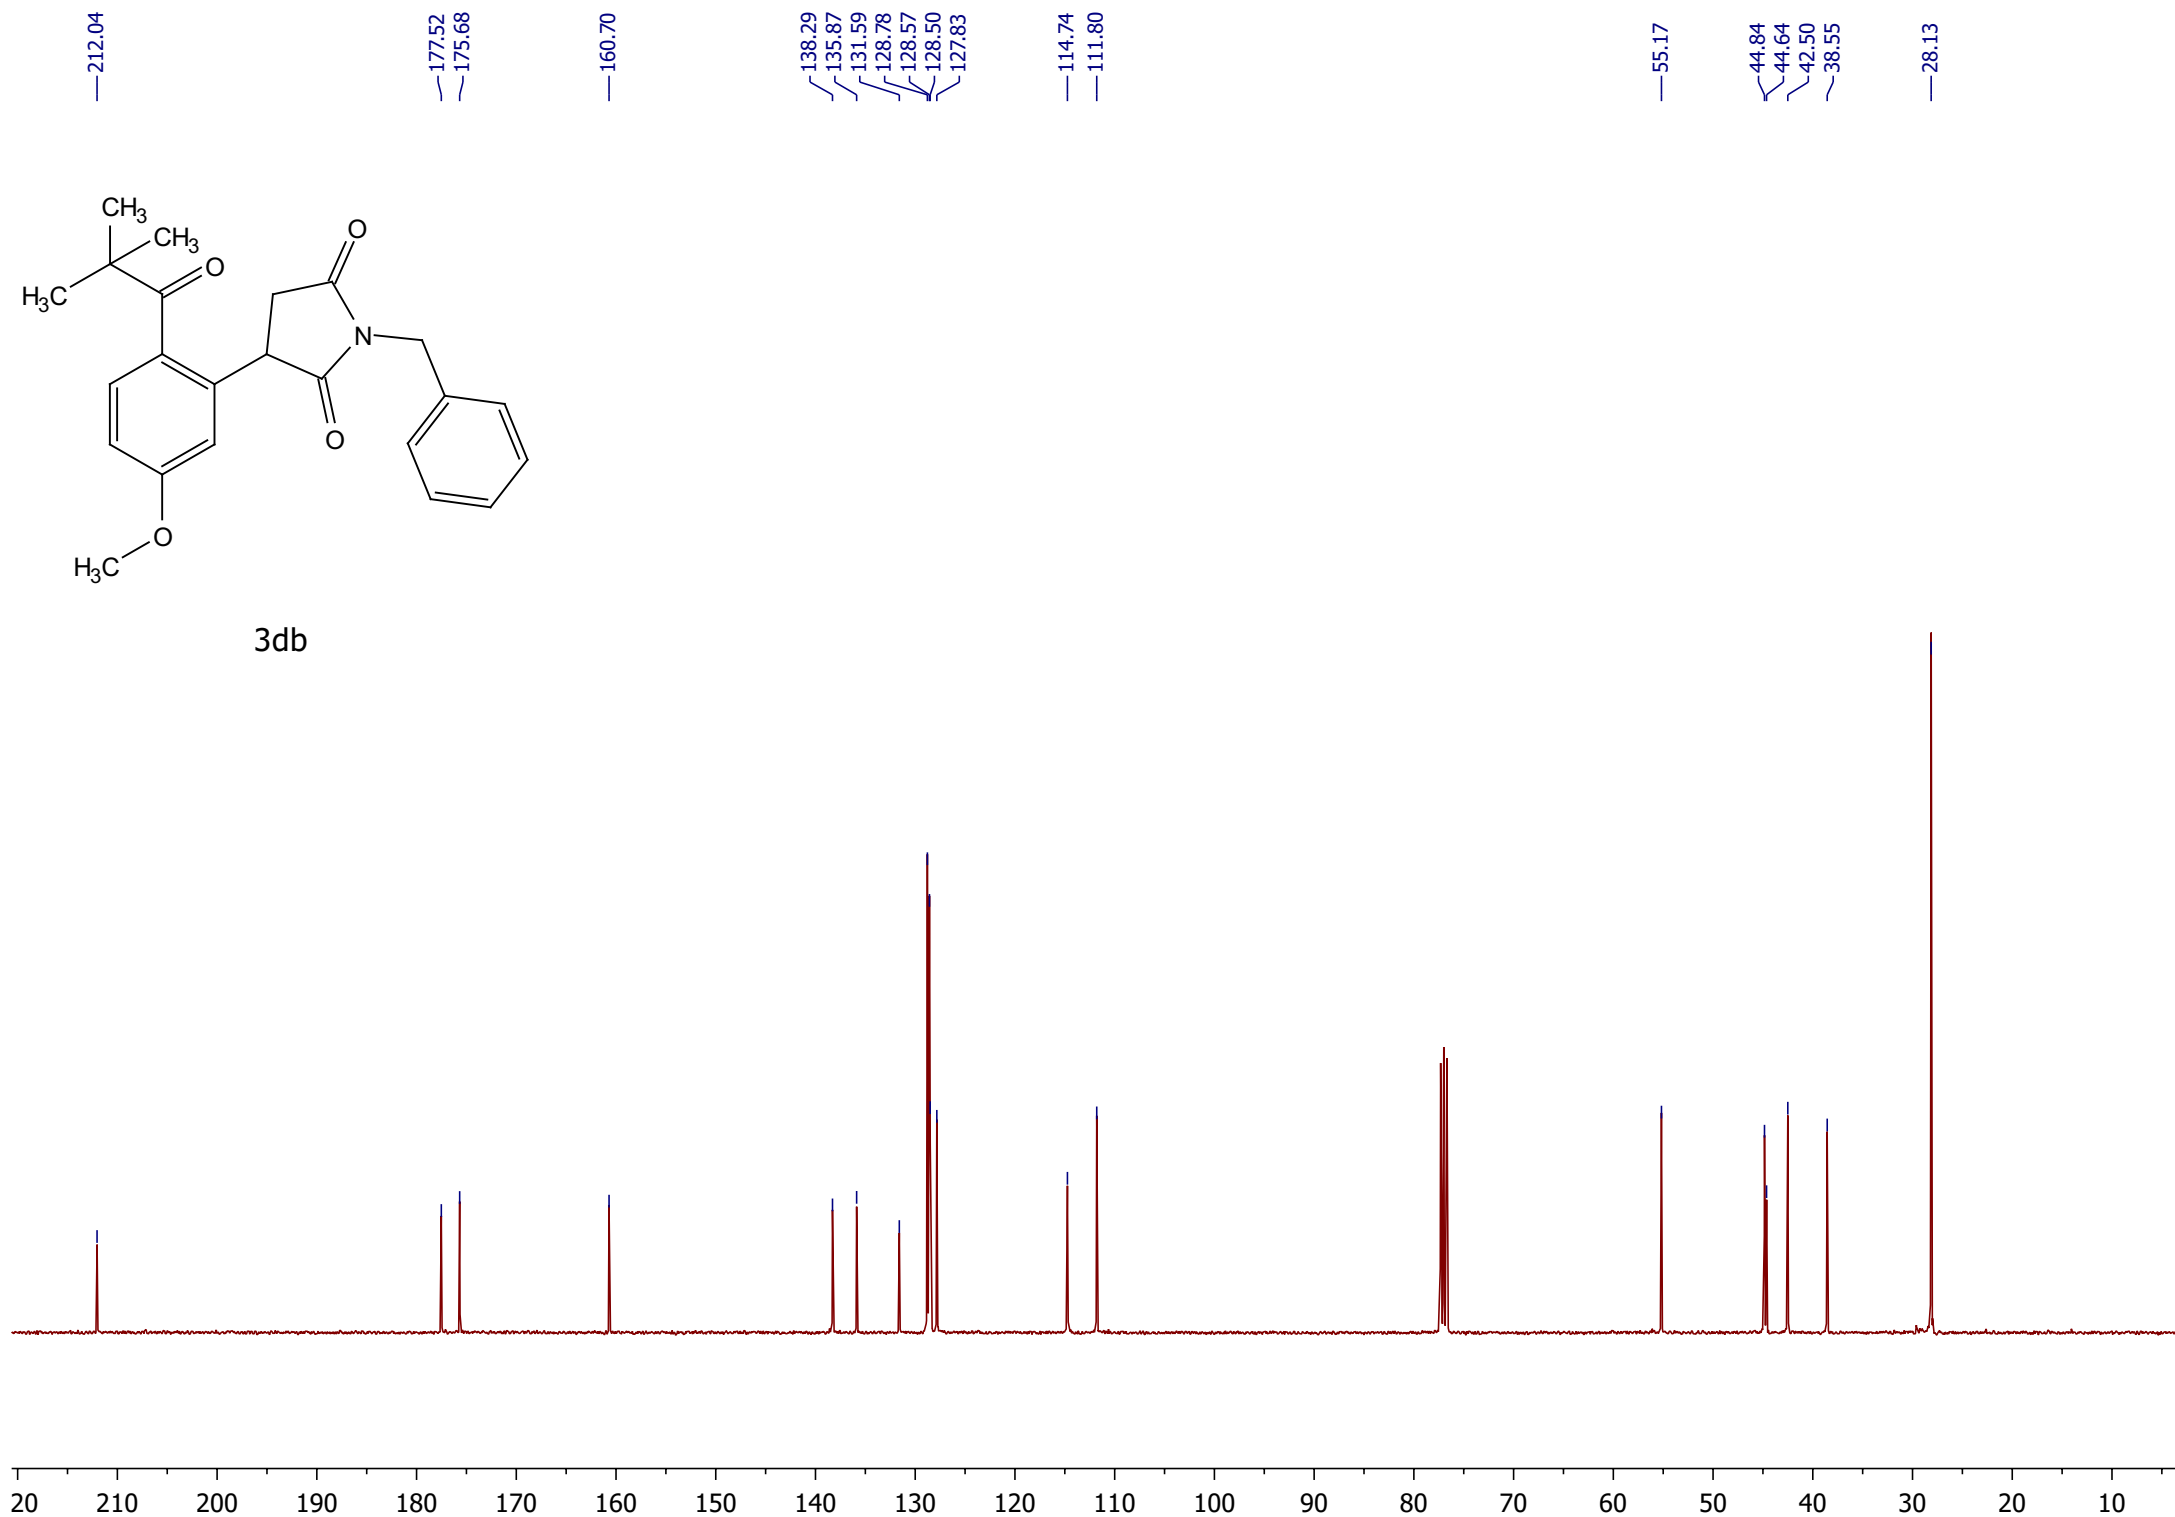

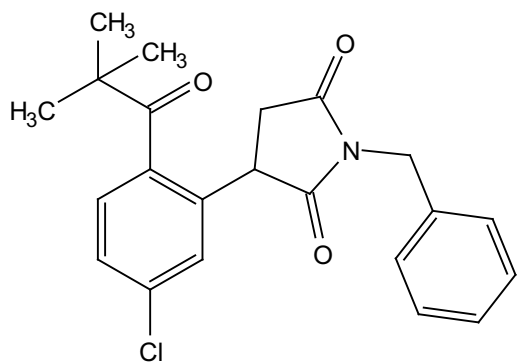

3b

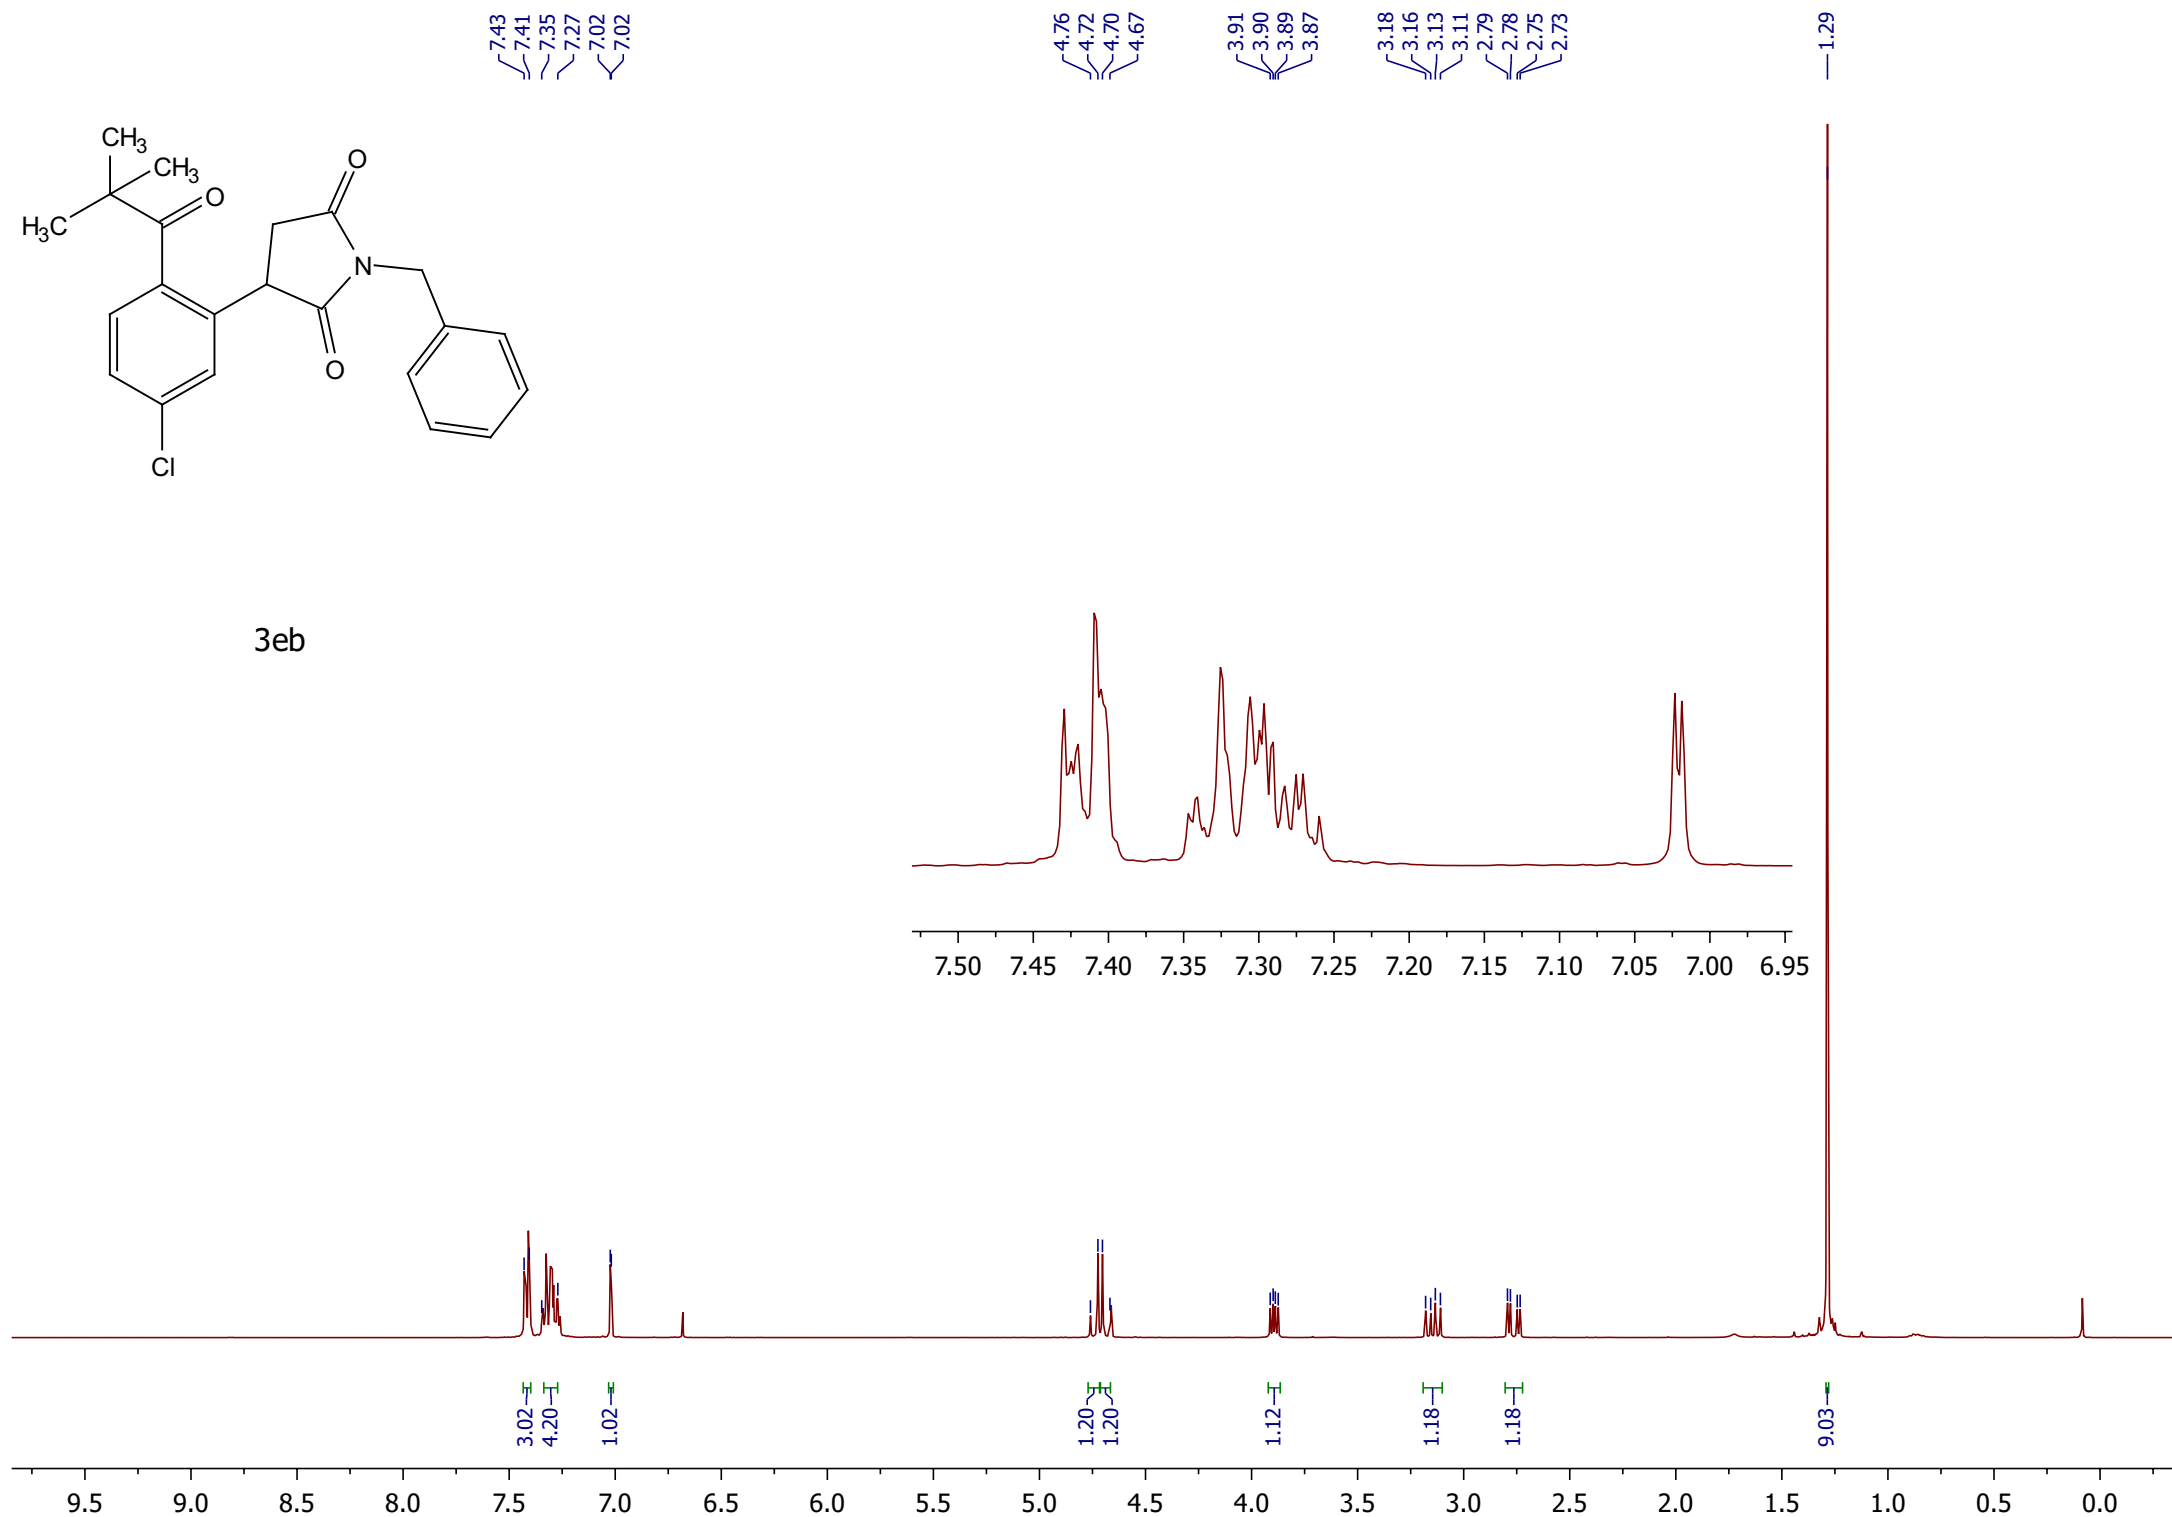

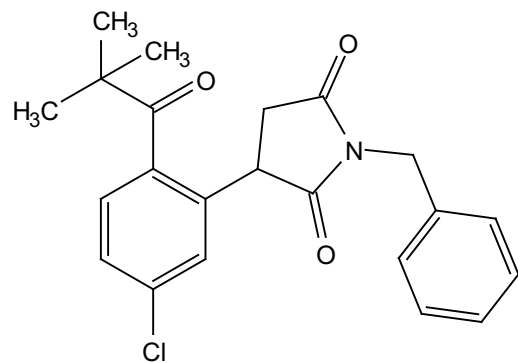

3eb

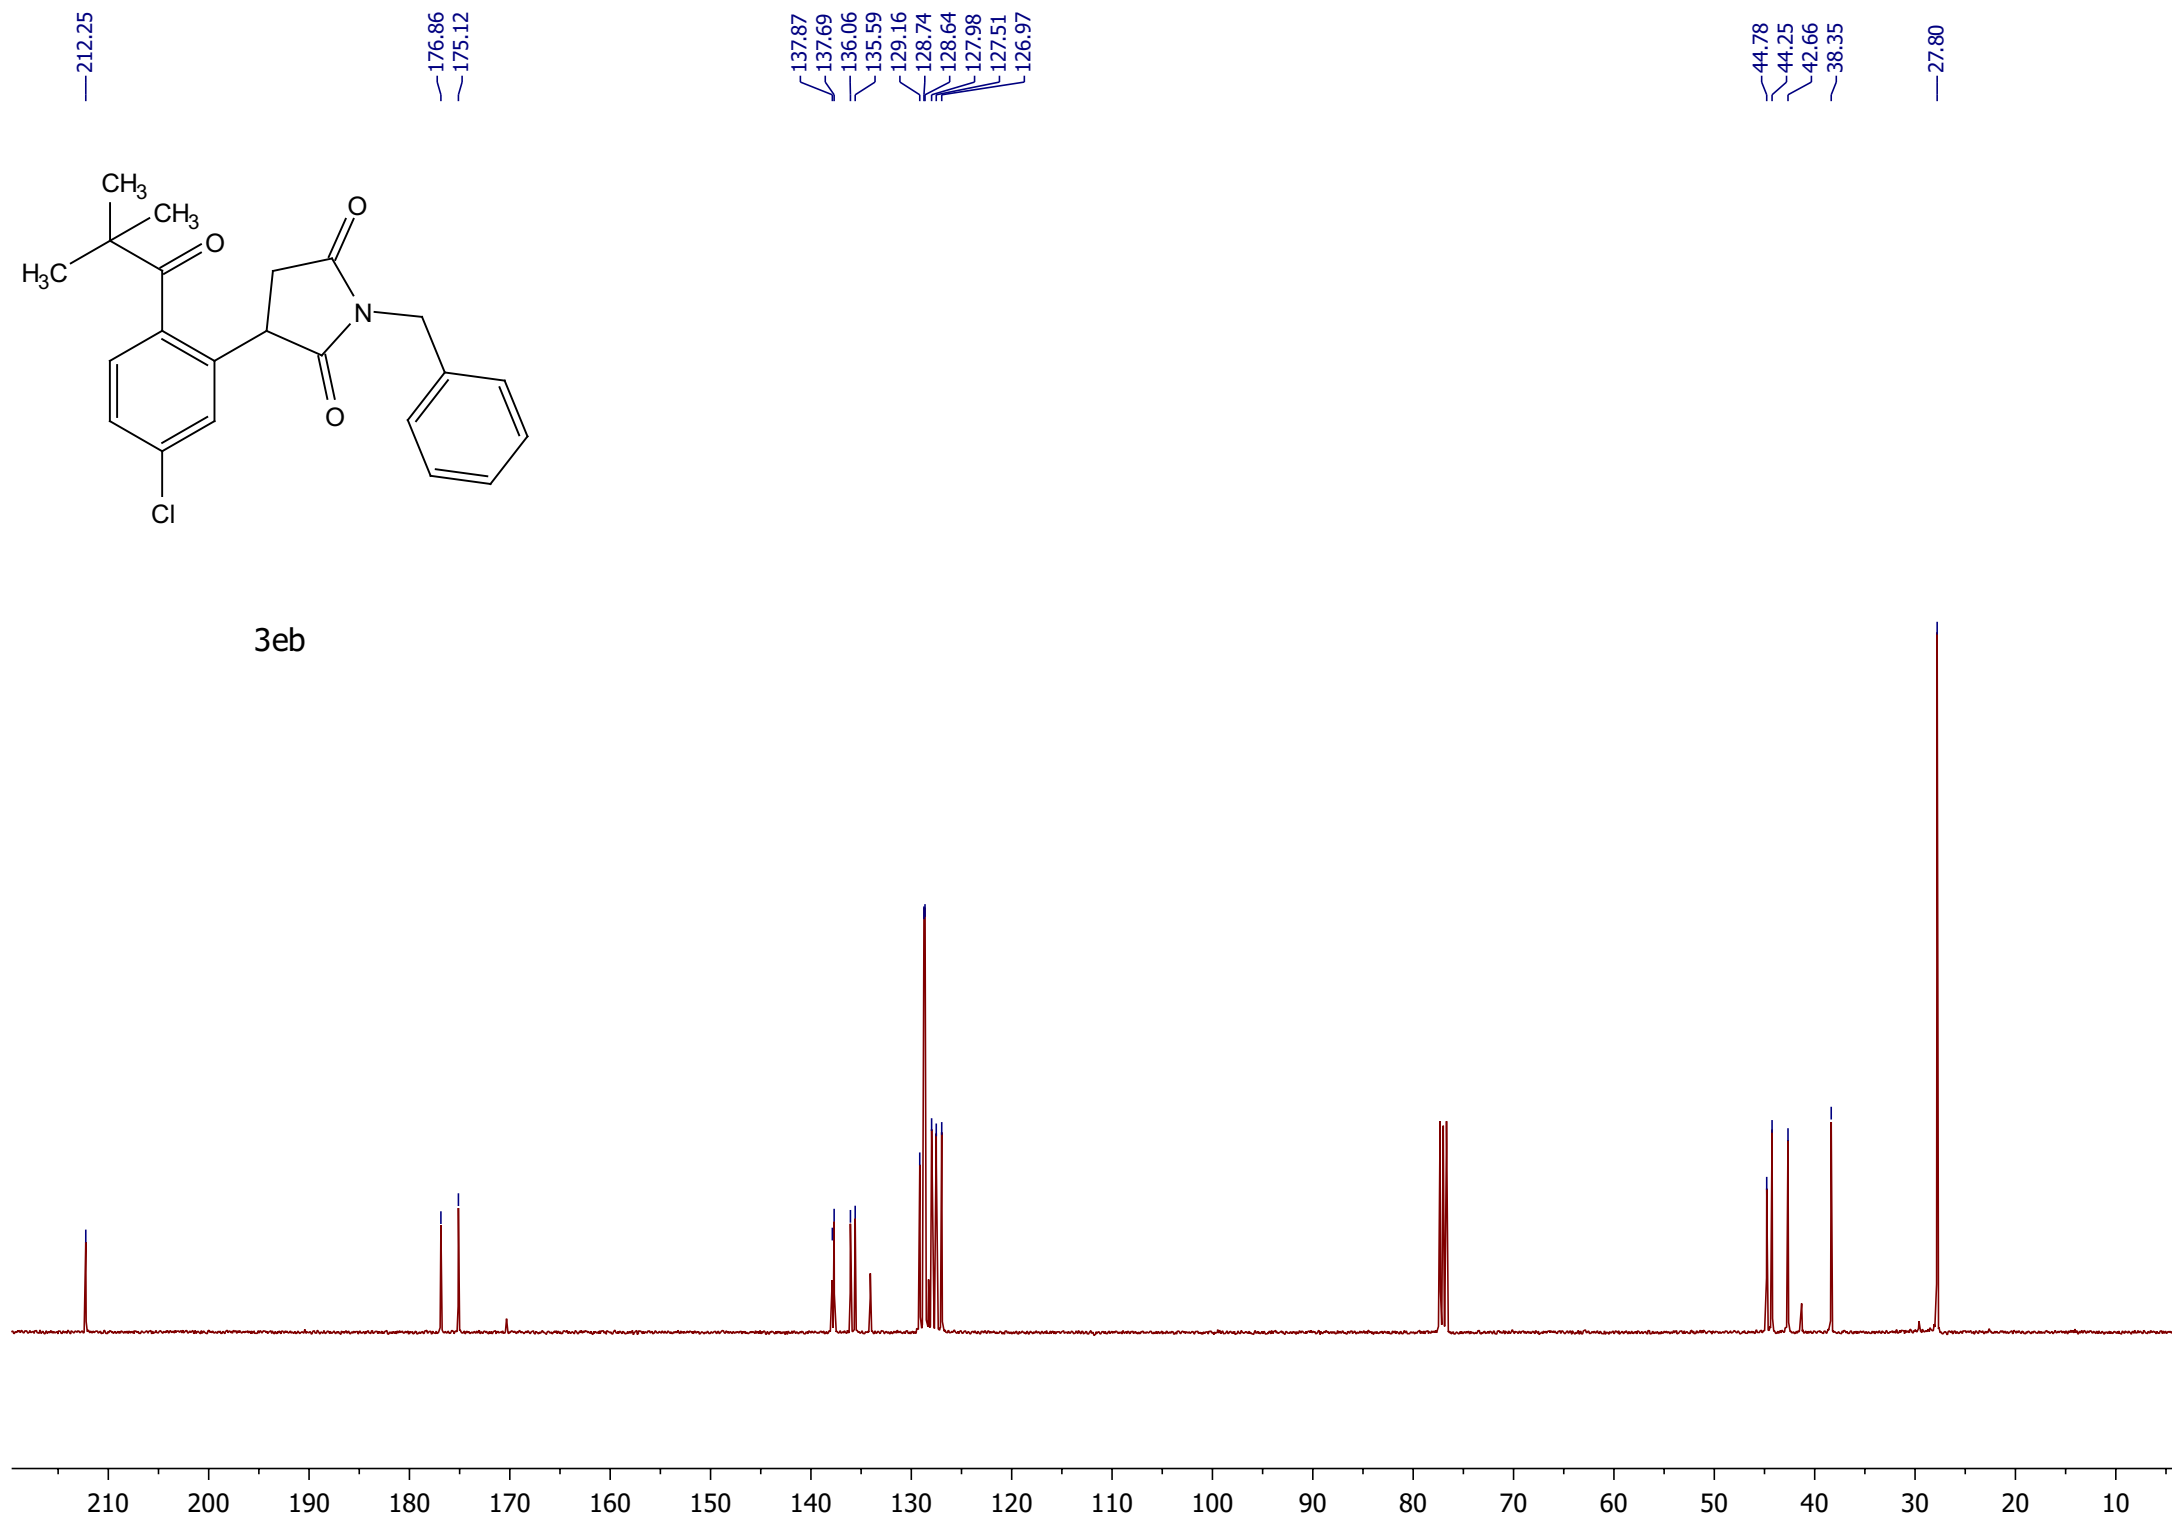

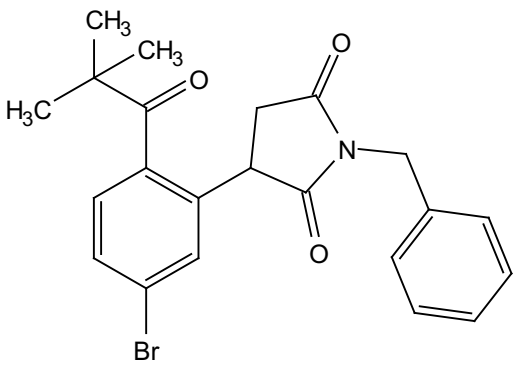

3b

7.46  
7.45  
7.44  
7.43  
7.41  
7.35  
7.33  
7.29  
7.17  
7.17

4.77  
4.73  
4.71  
4.67

3.89  
3.88  
3.87  
3.86

3.19  
3.17  
3.14  
3.12

2.80  
2.79  
2.75  
2.74

1.28

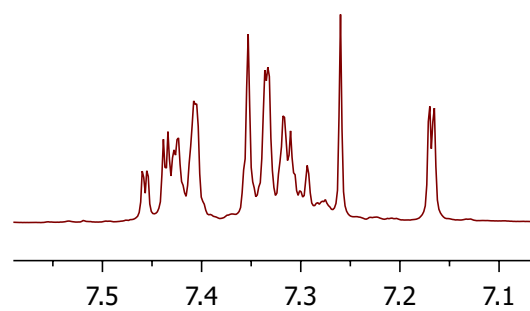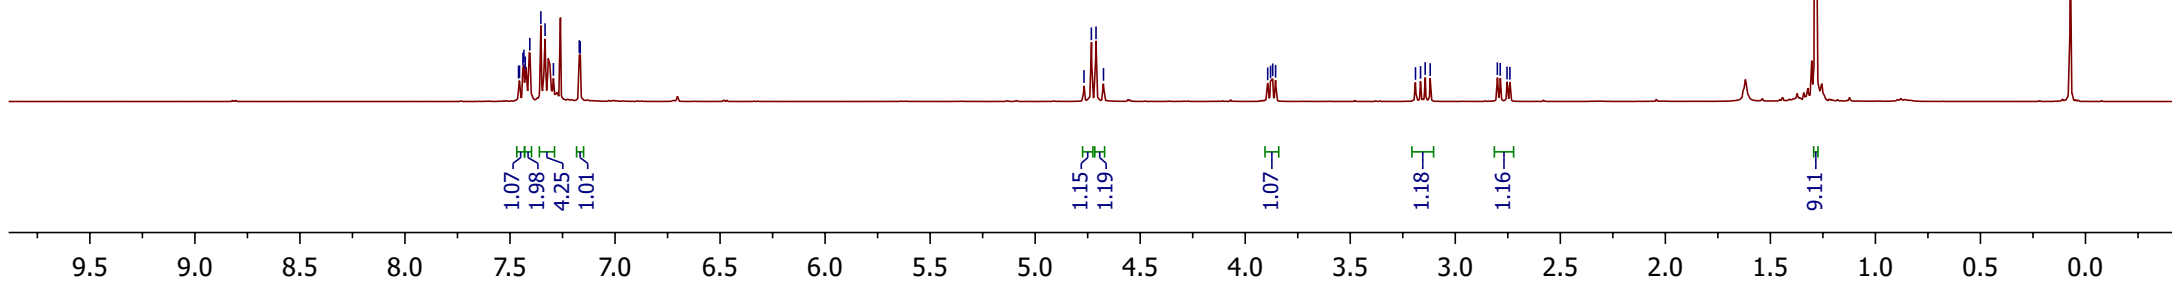

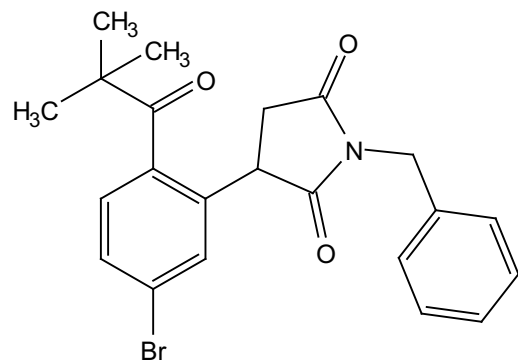

3fb

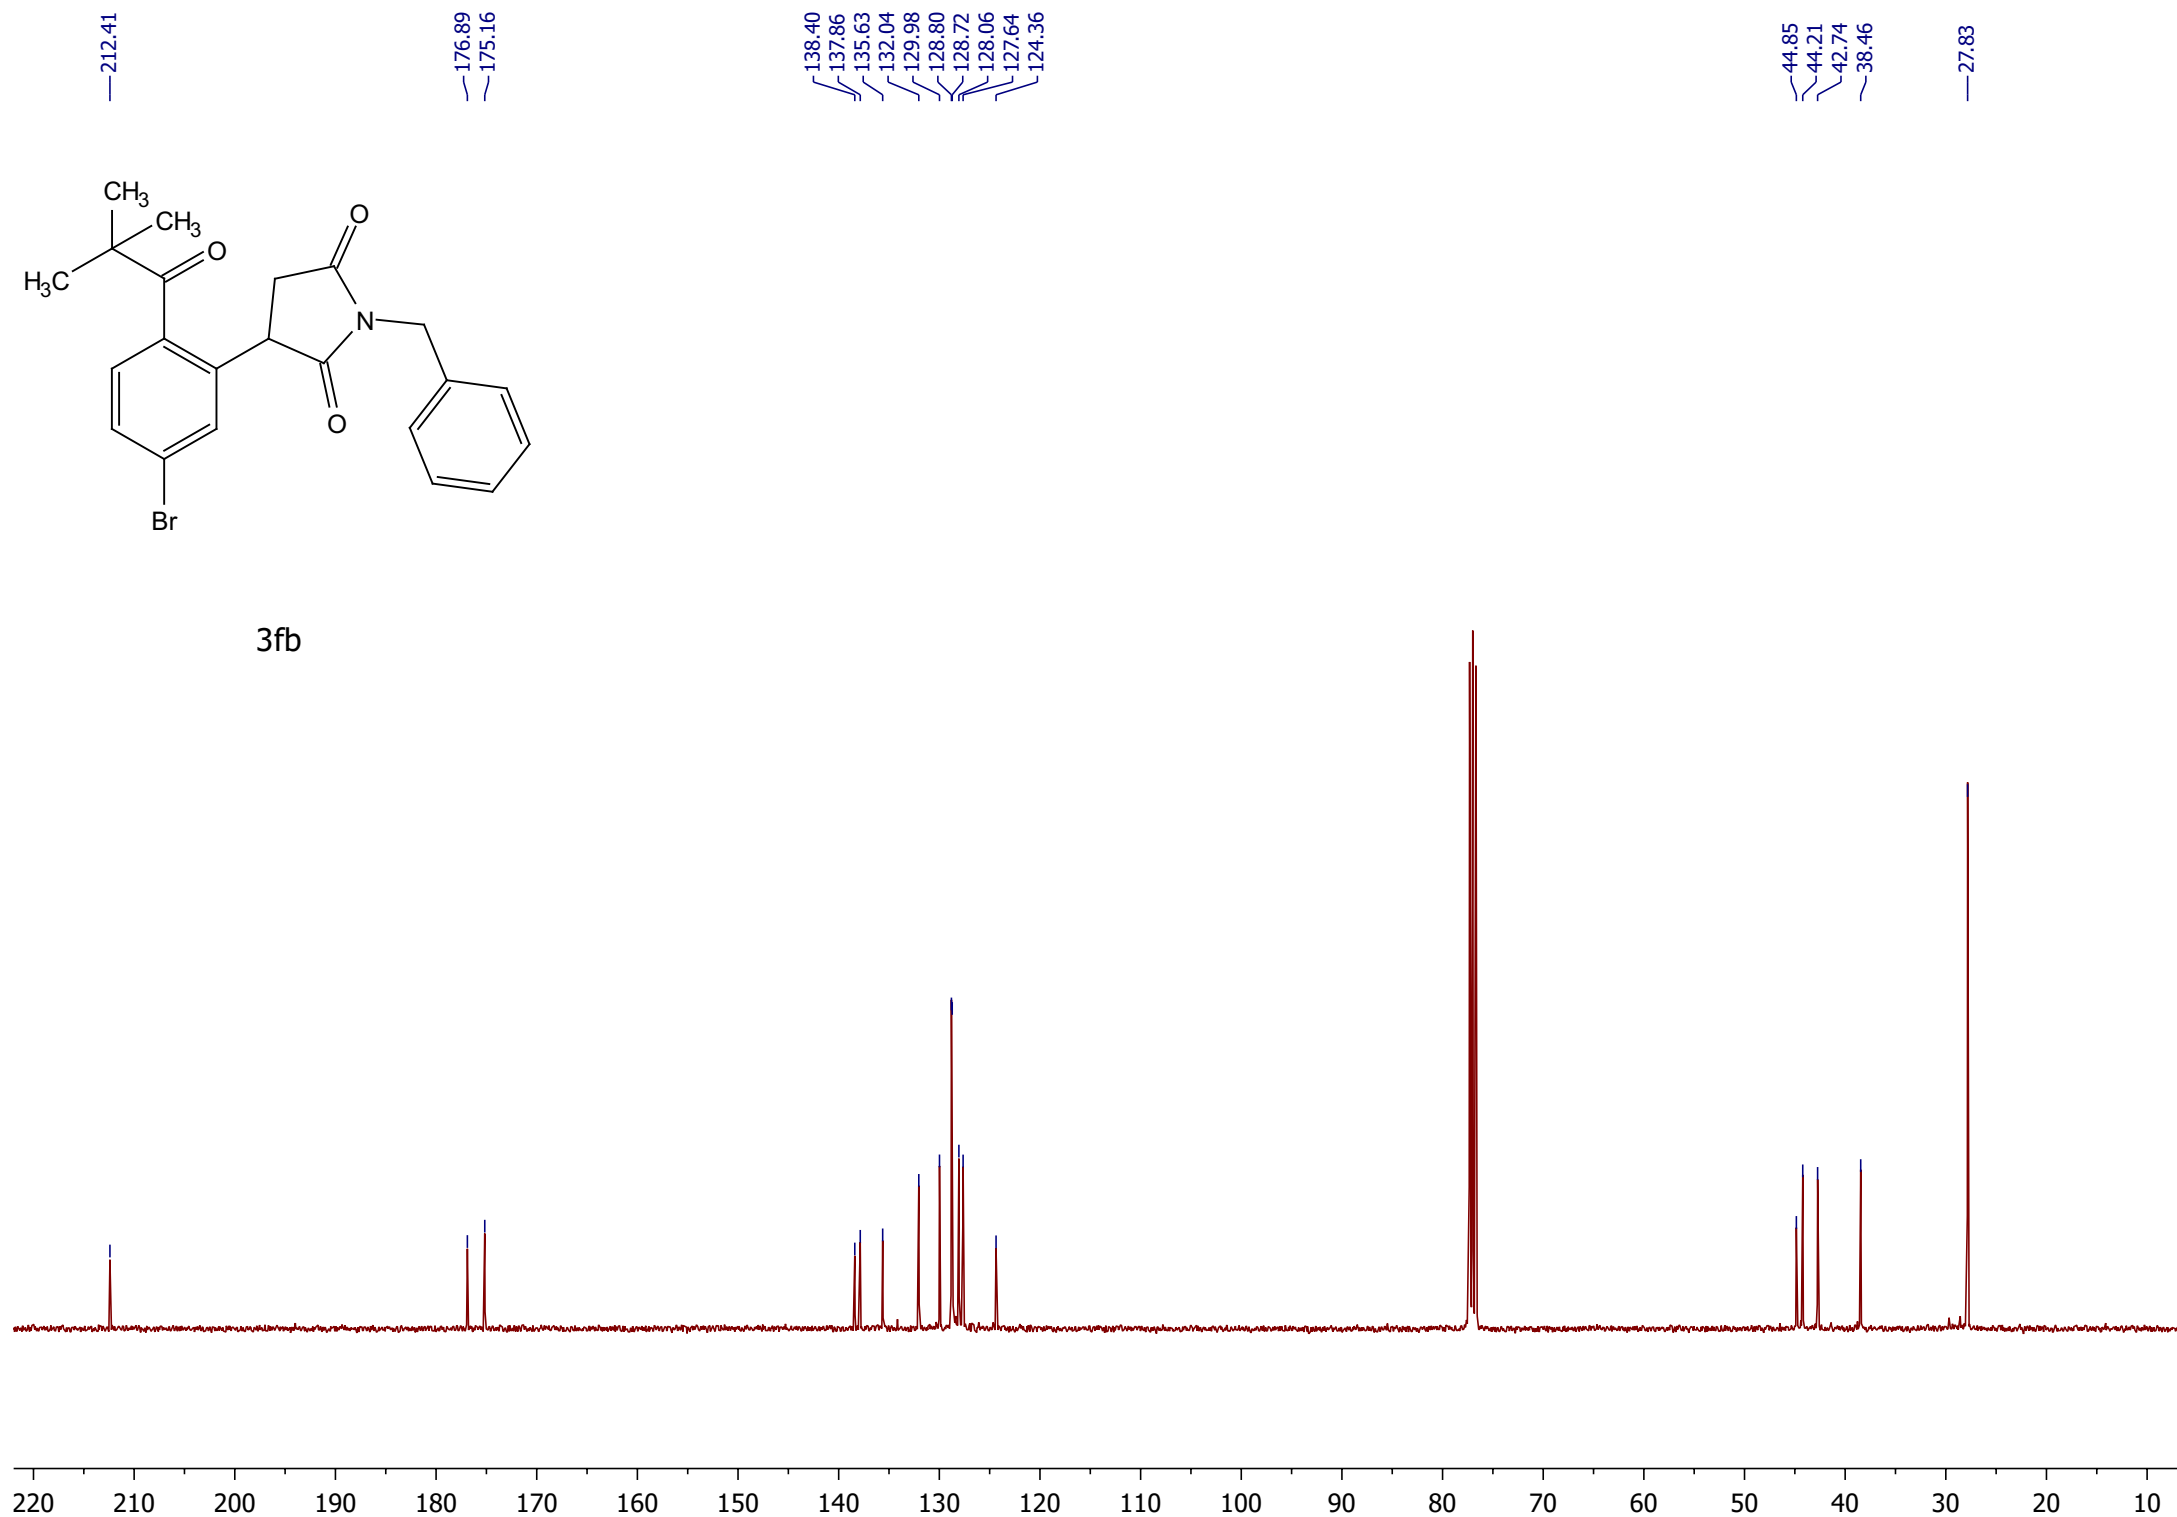

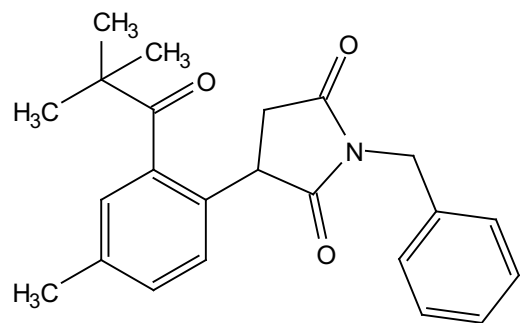

3gb

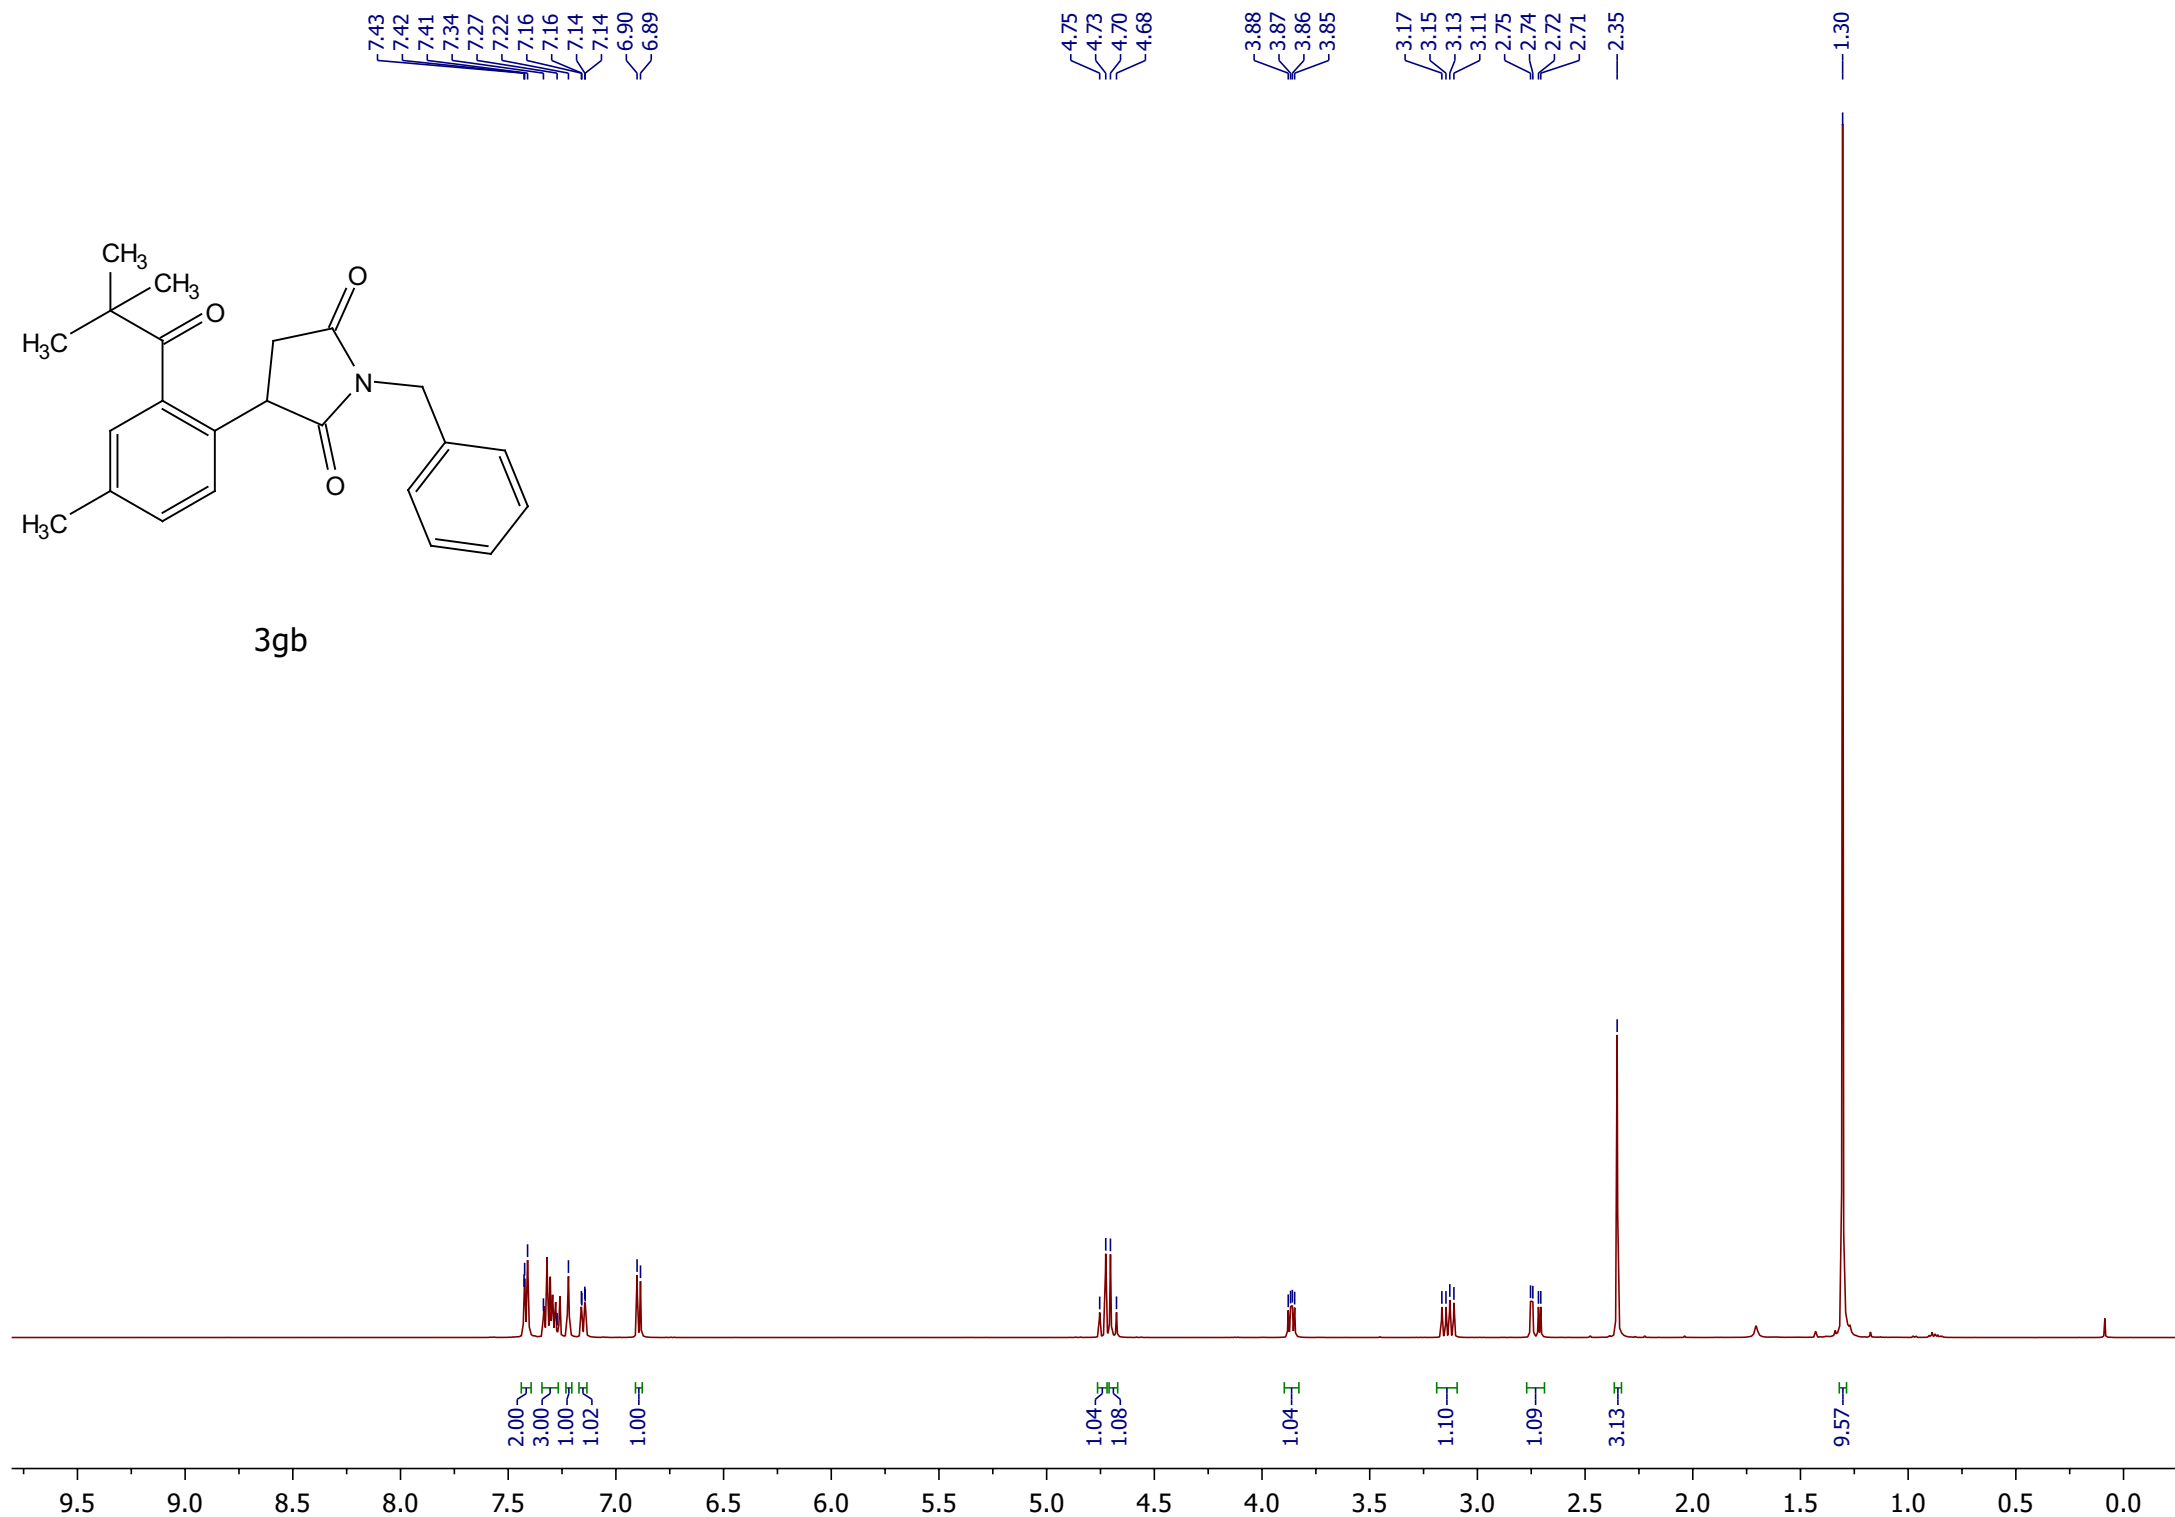

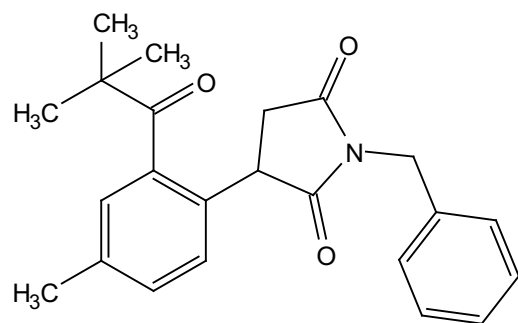

3gb

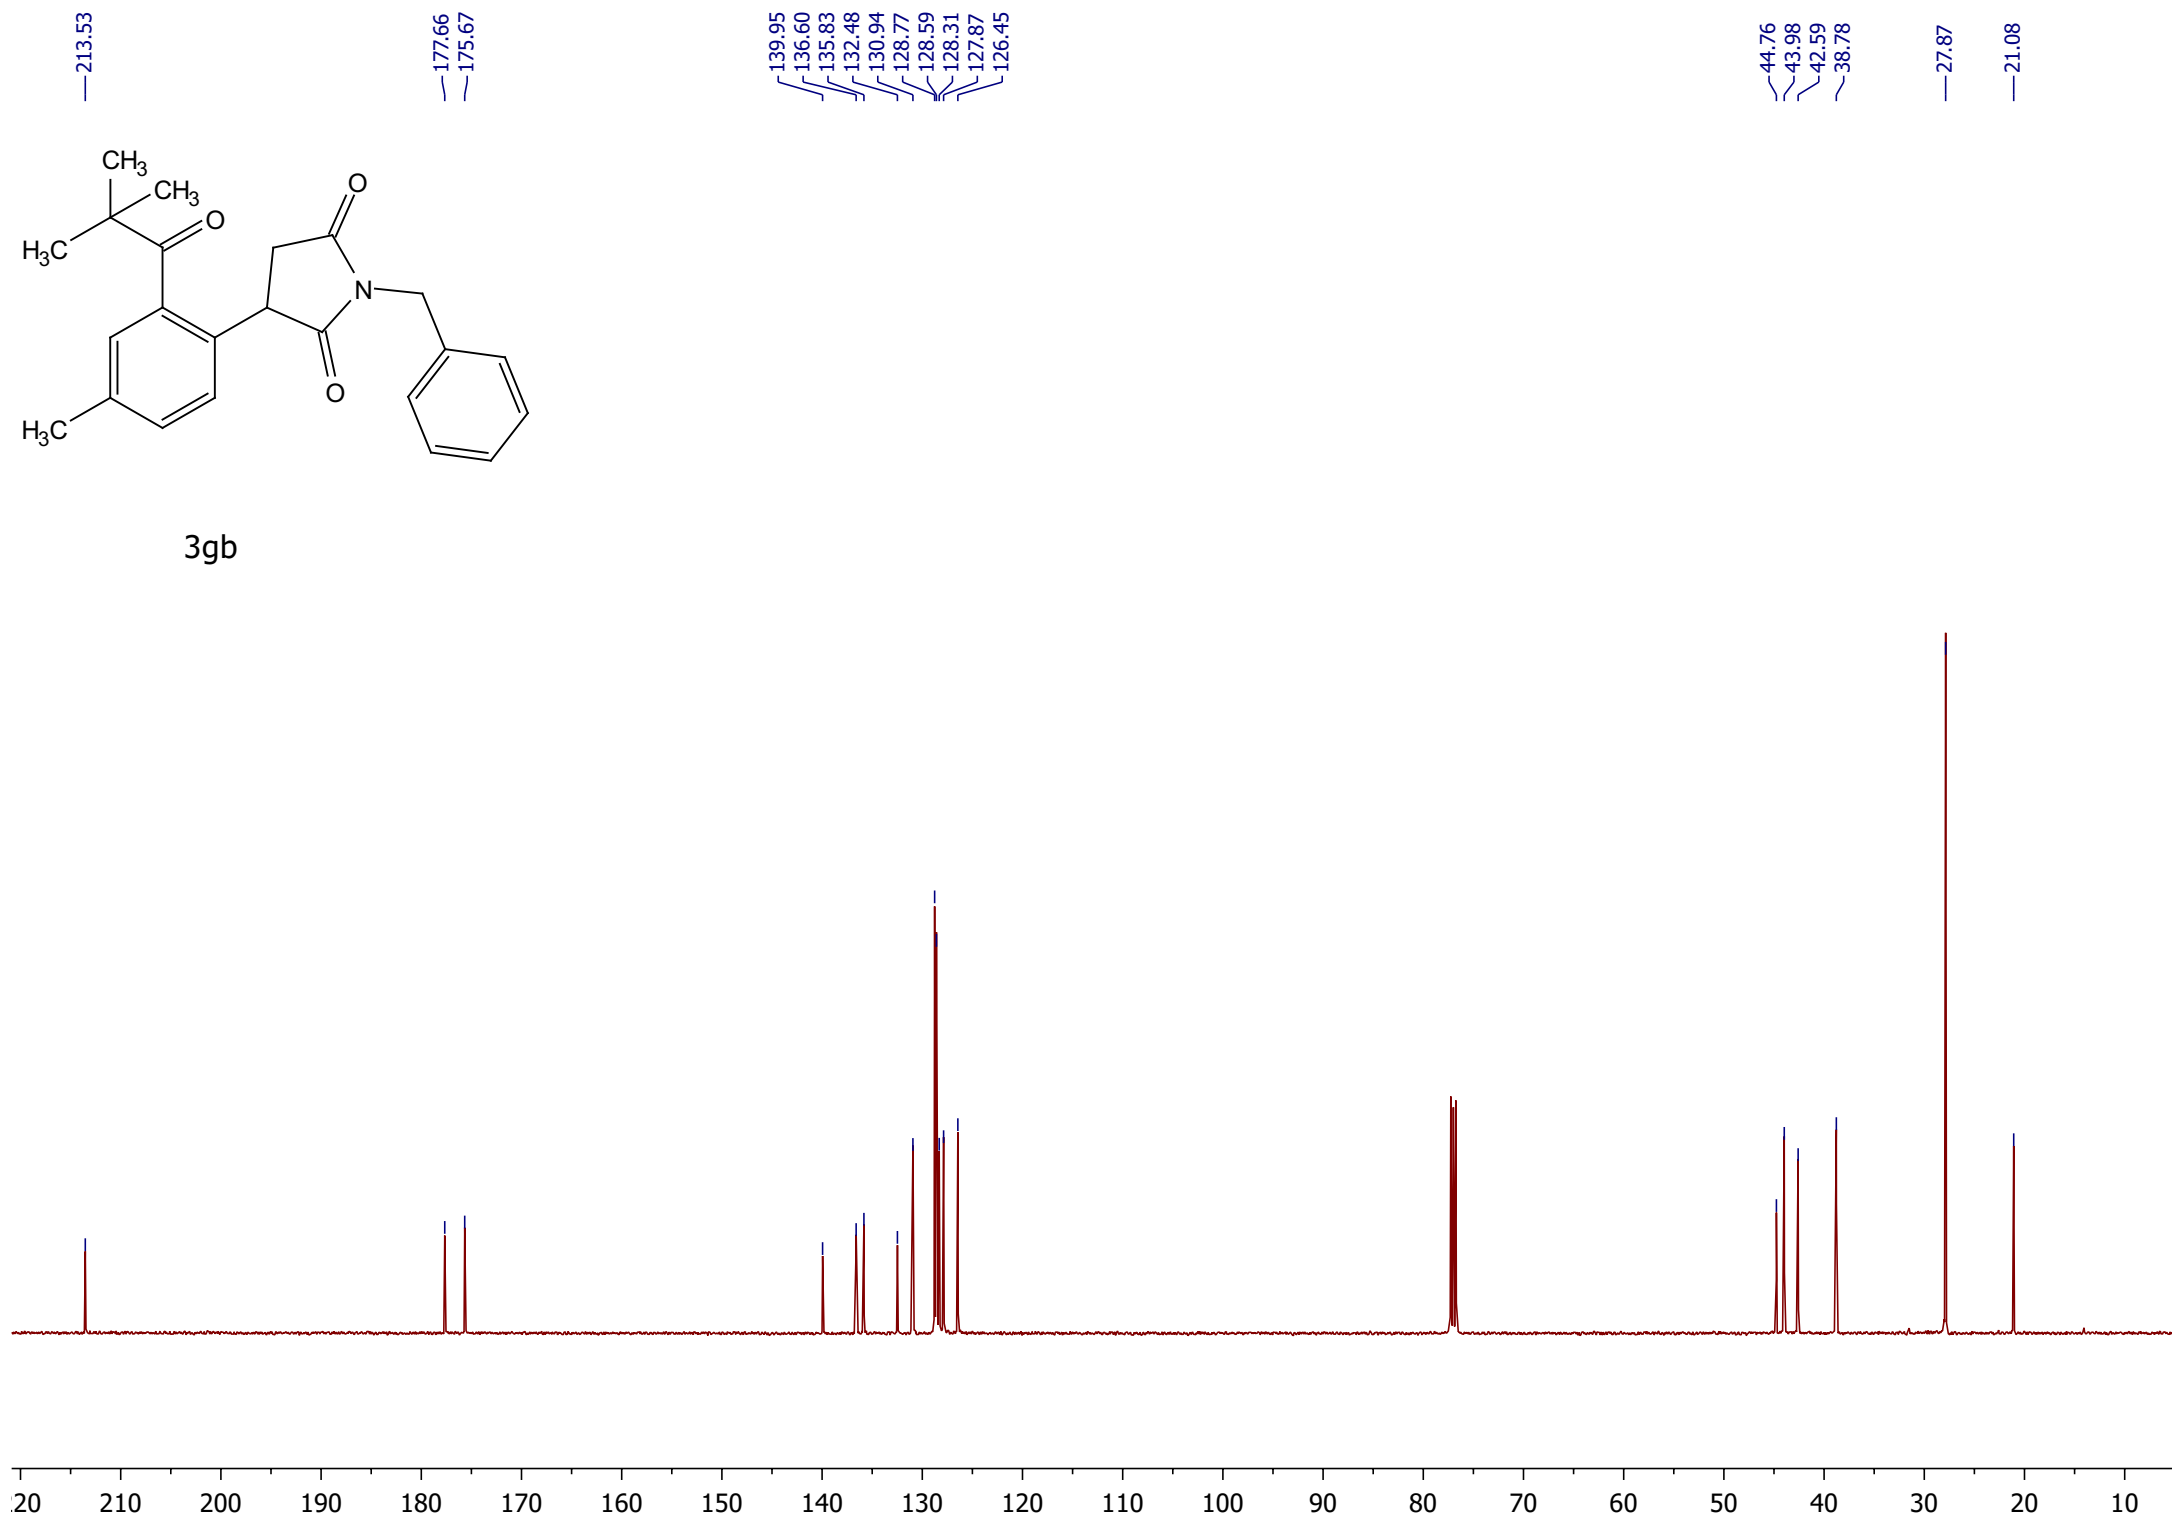

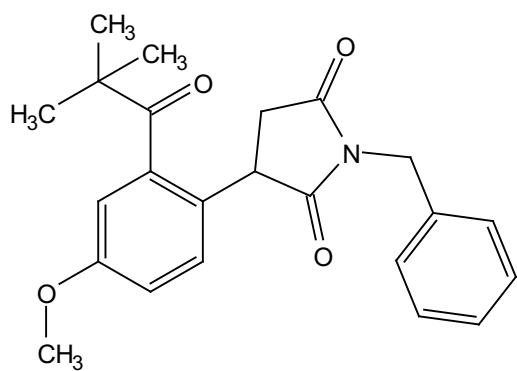

3hb

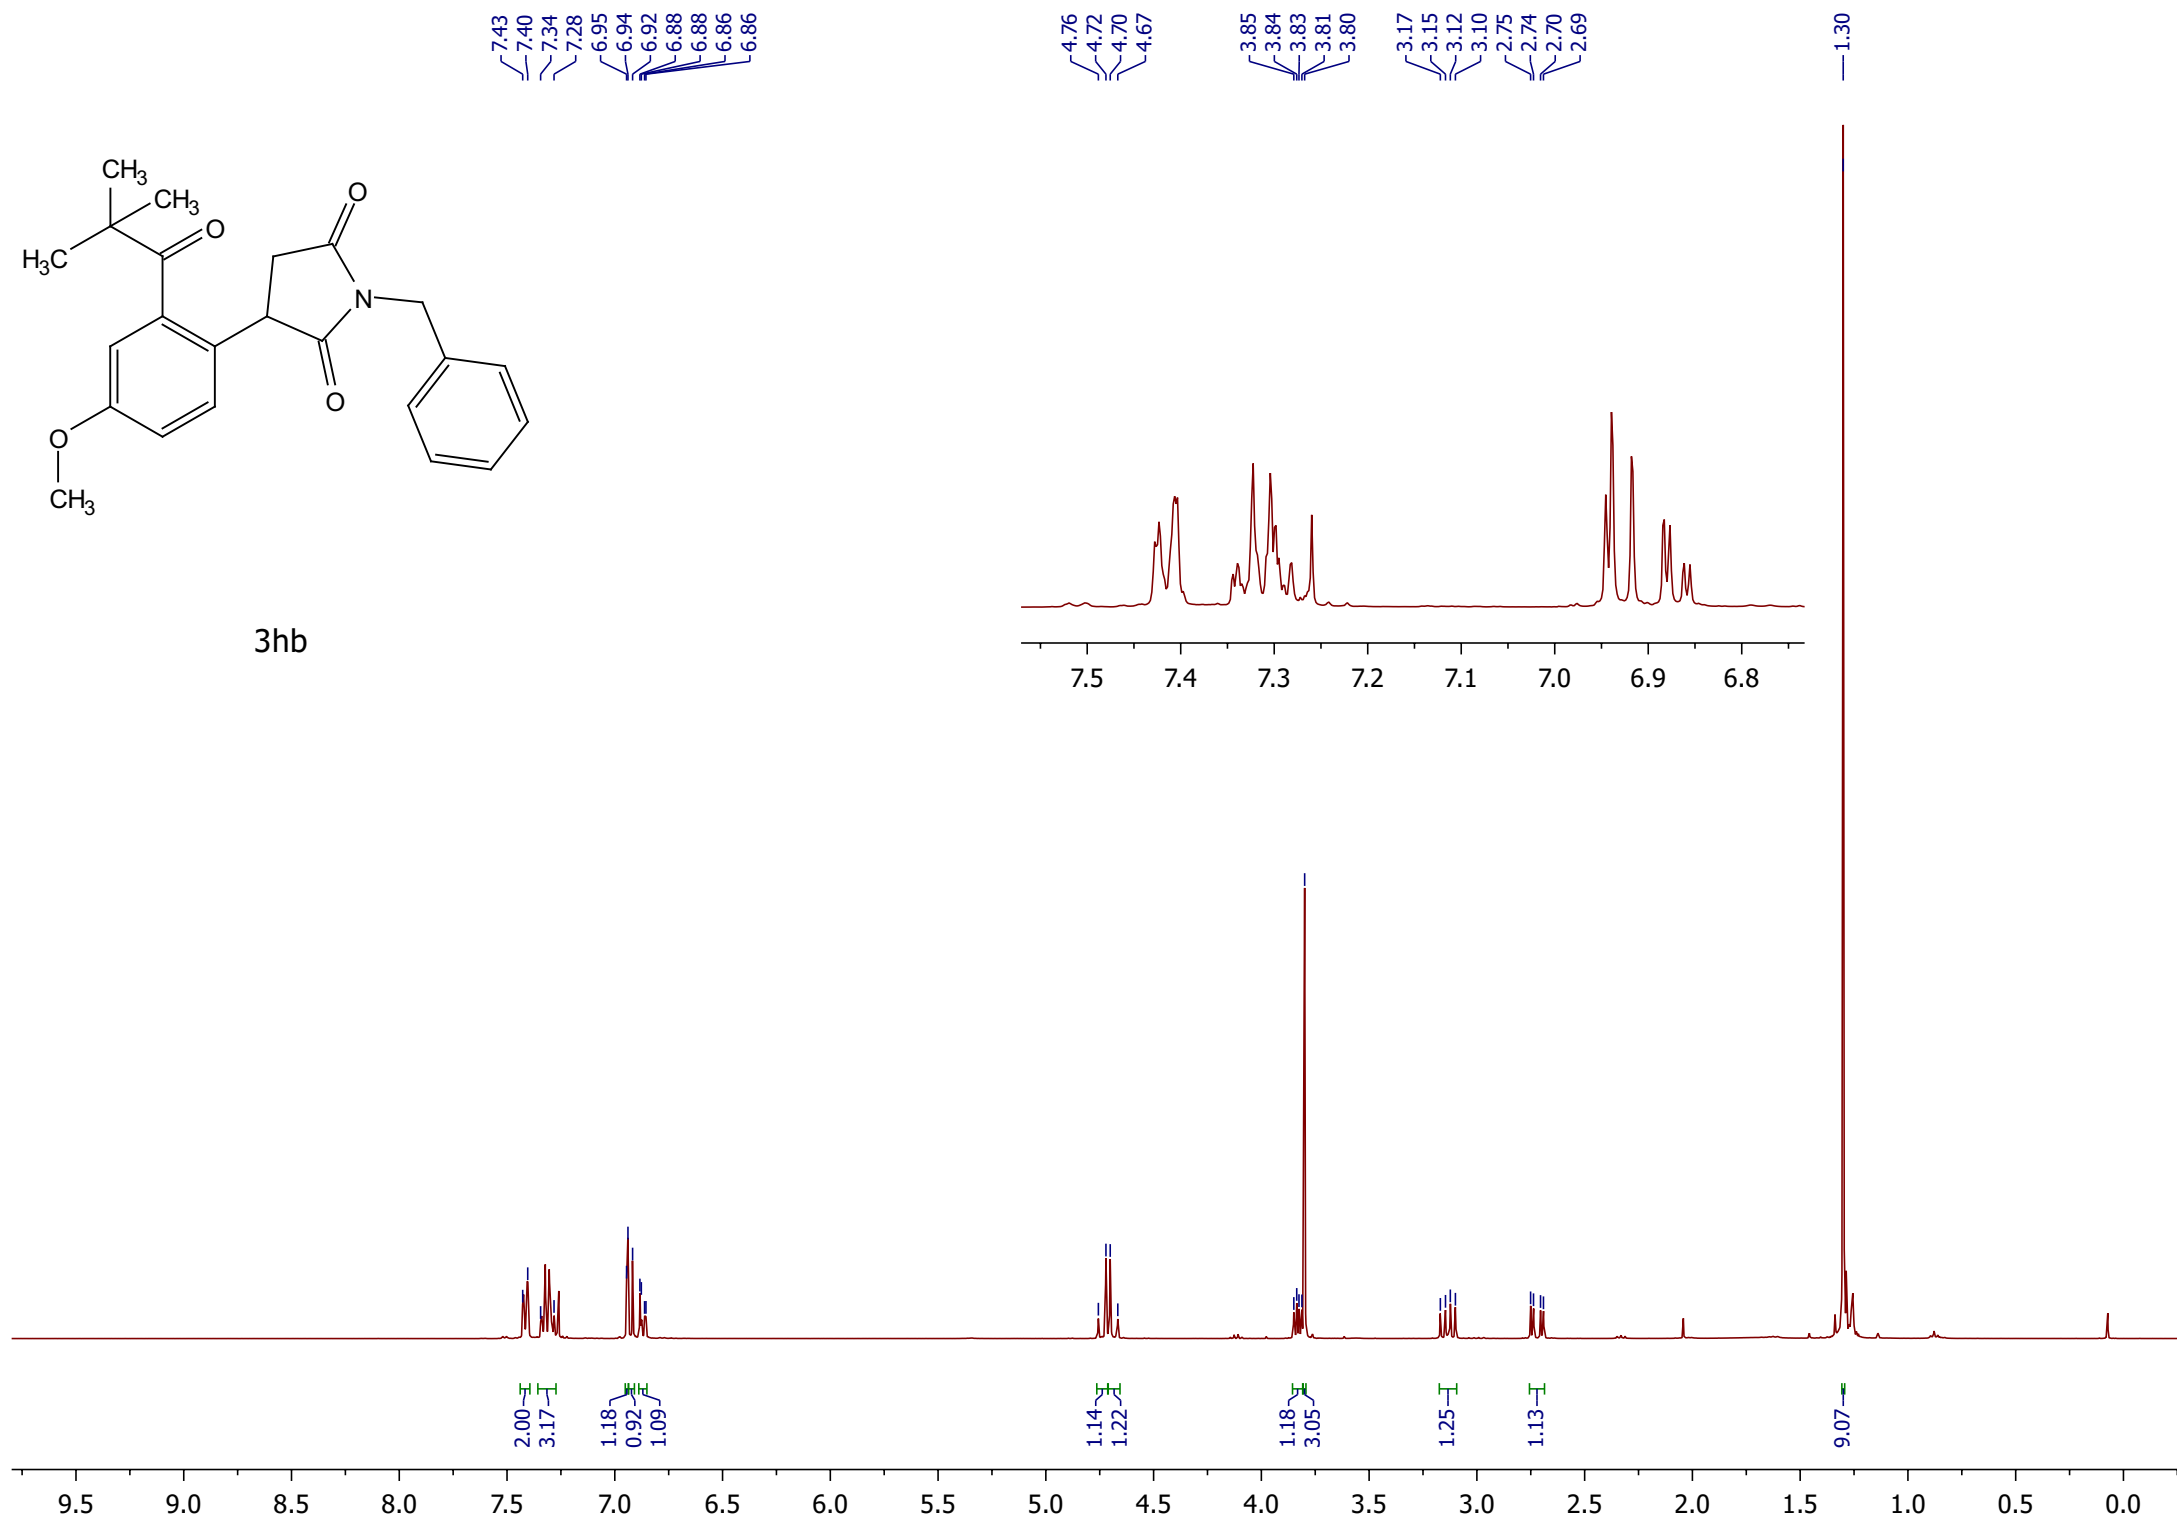

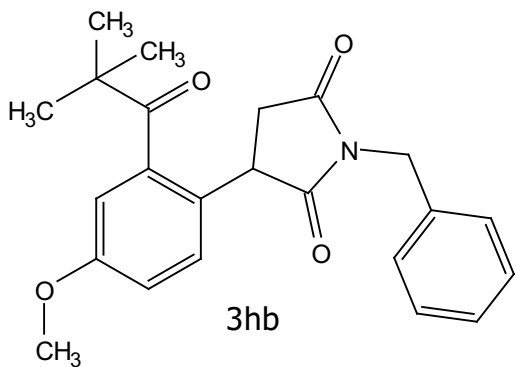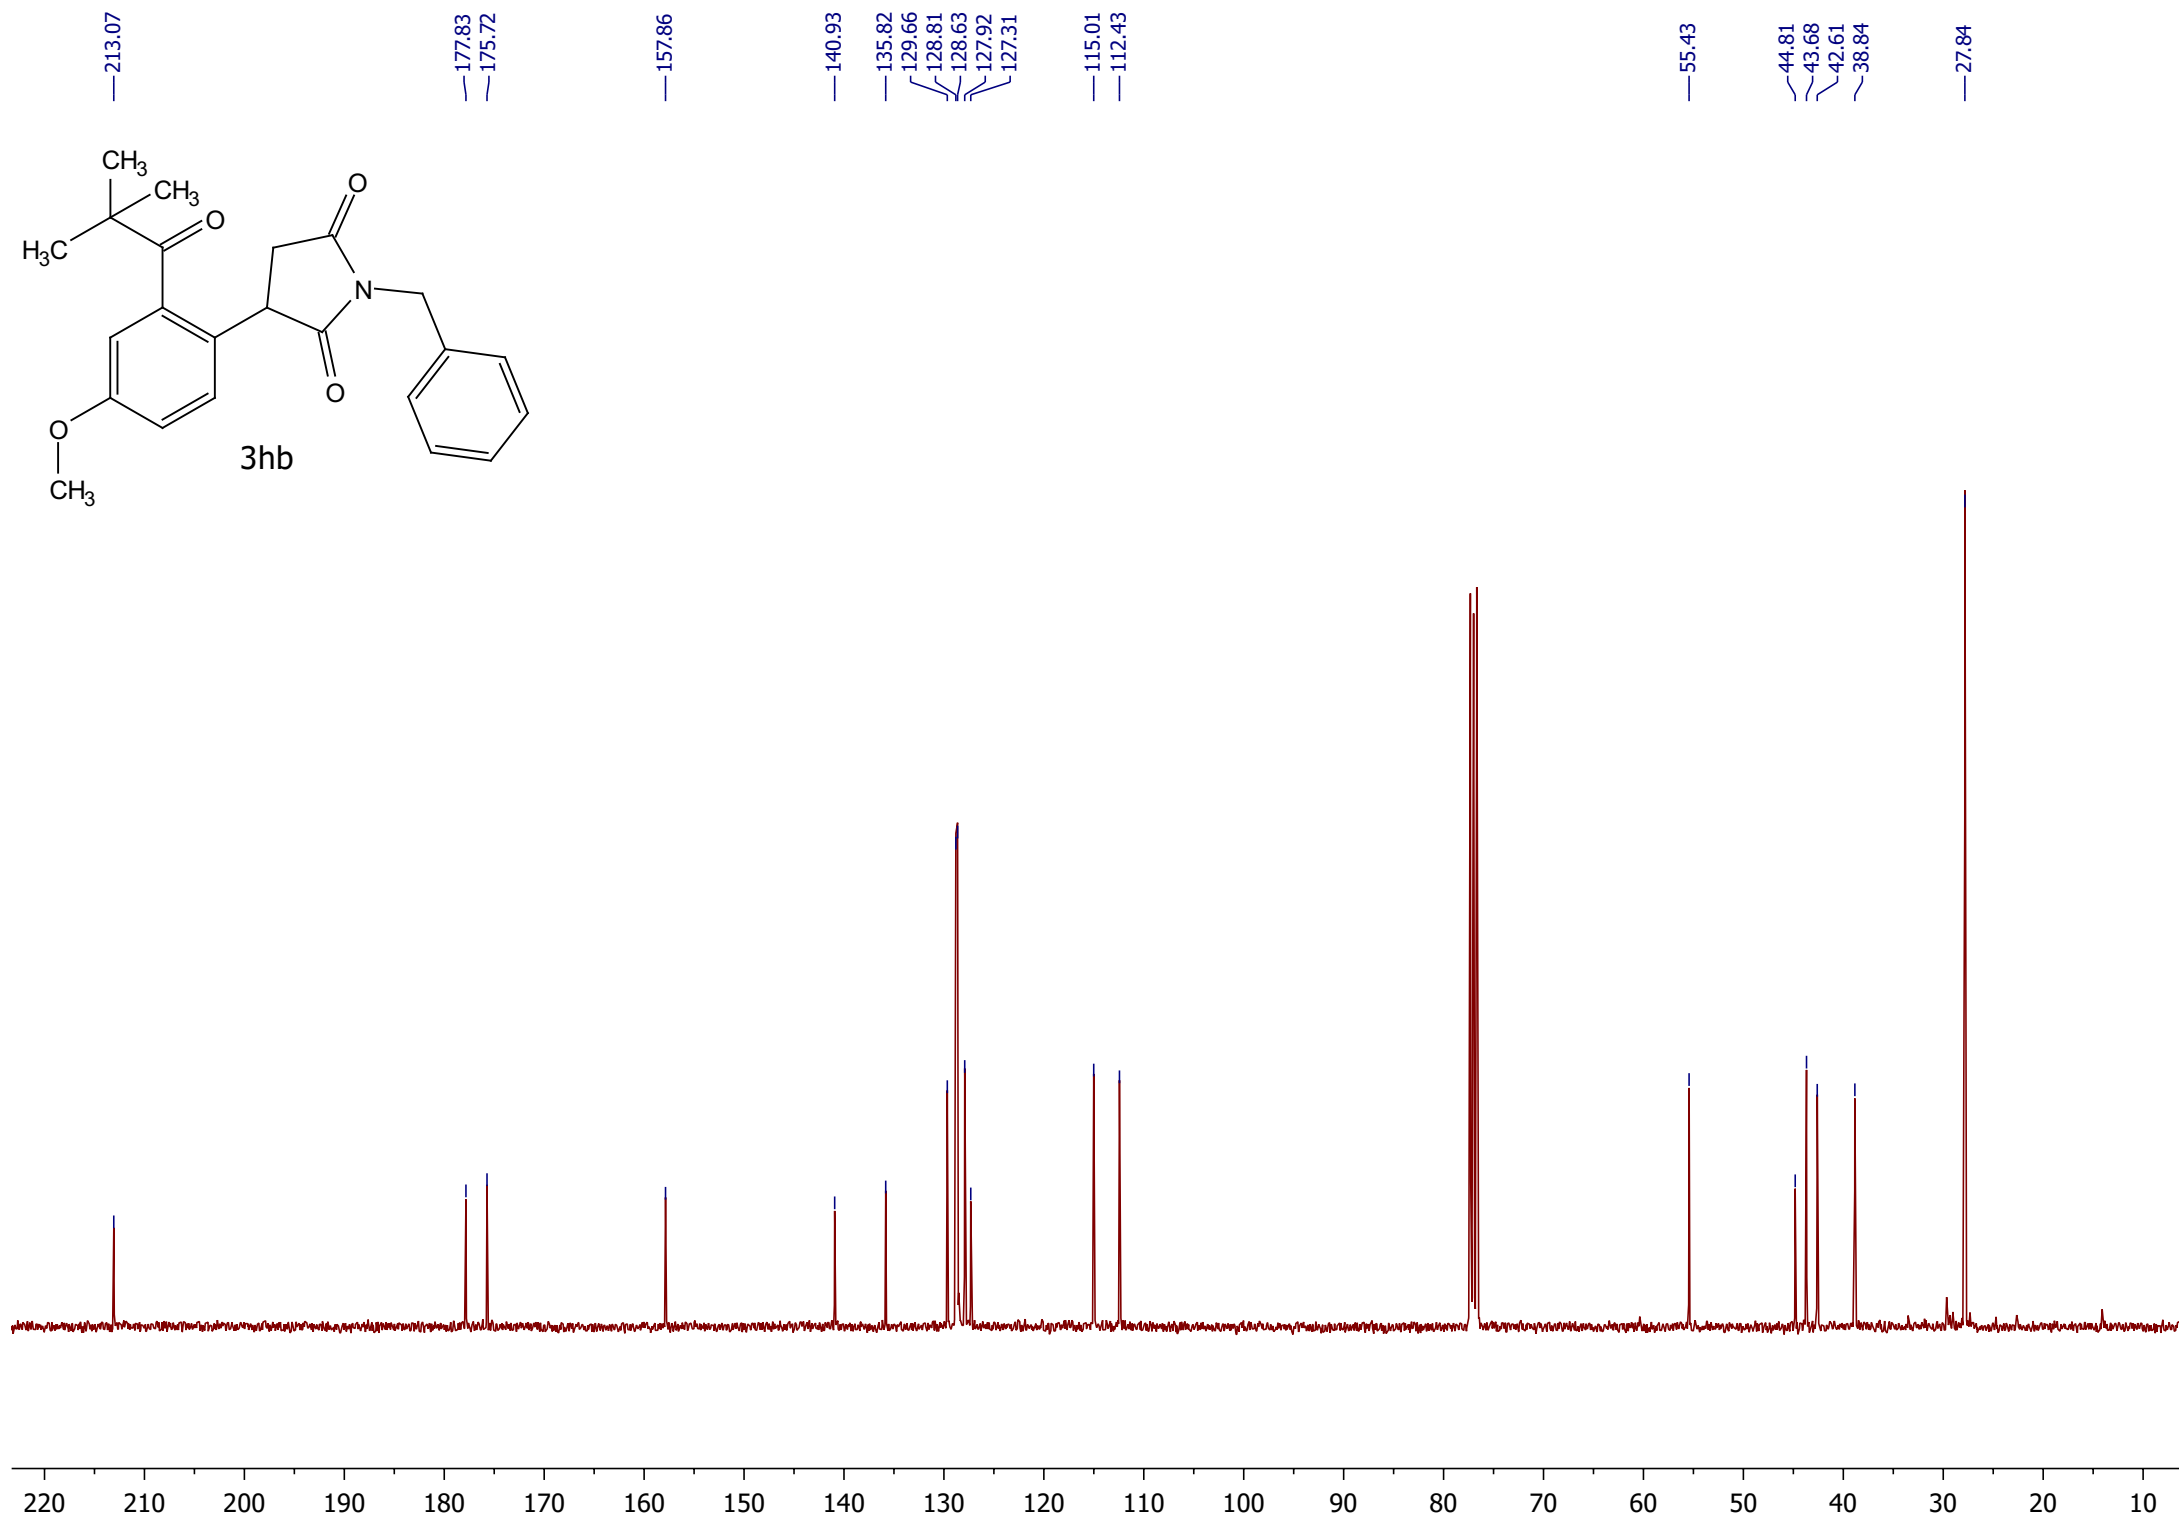

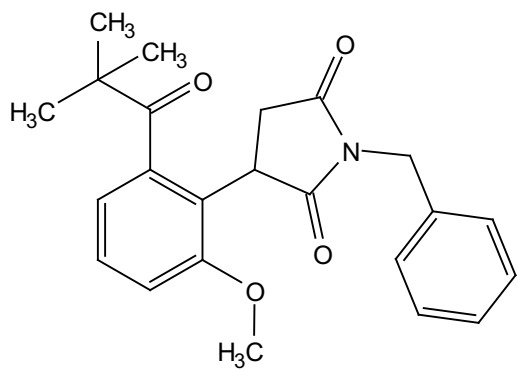

3hb'

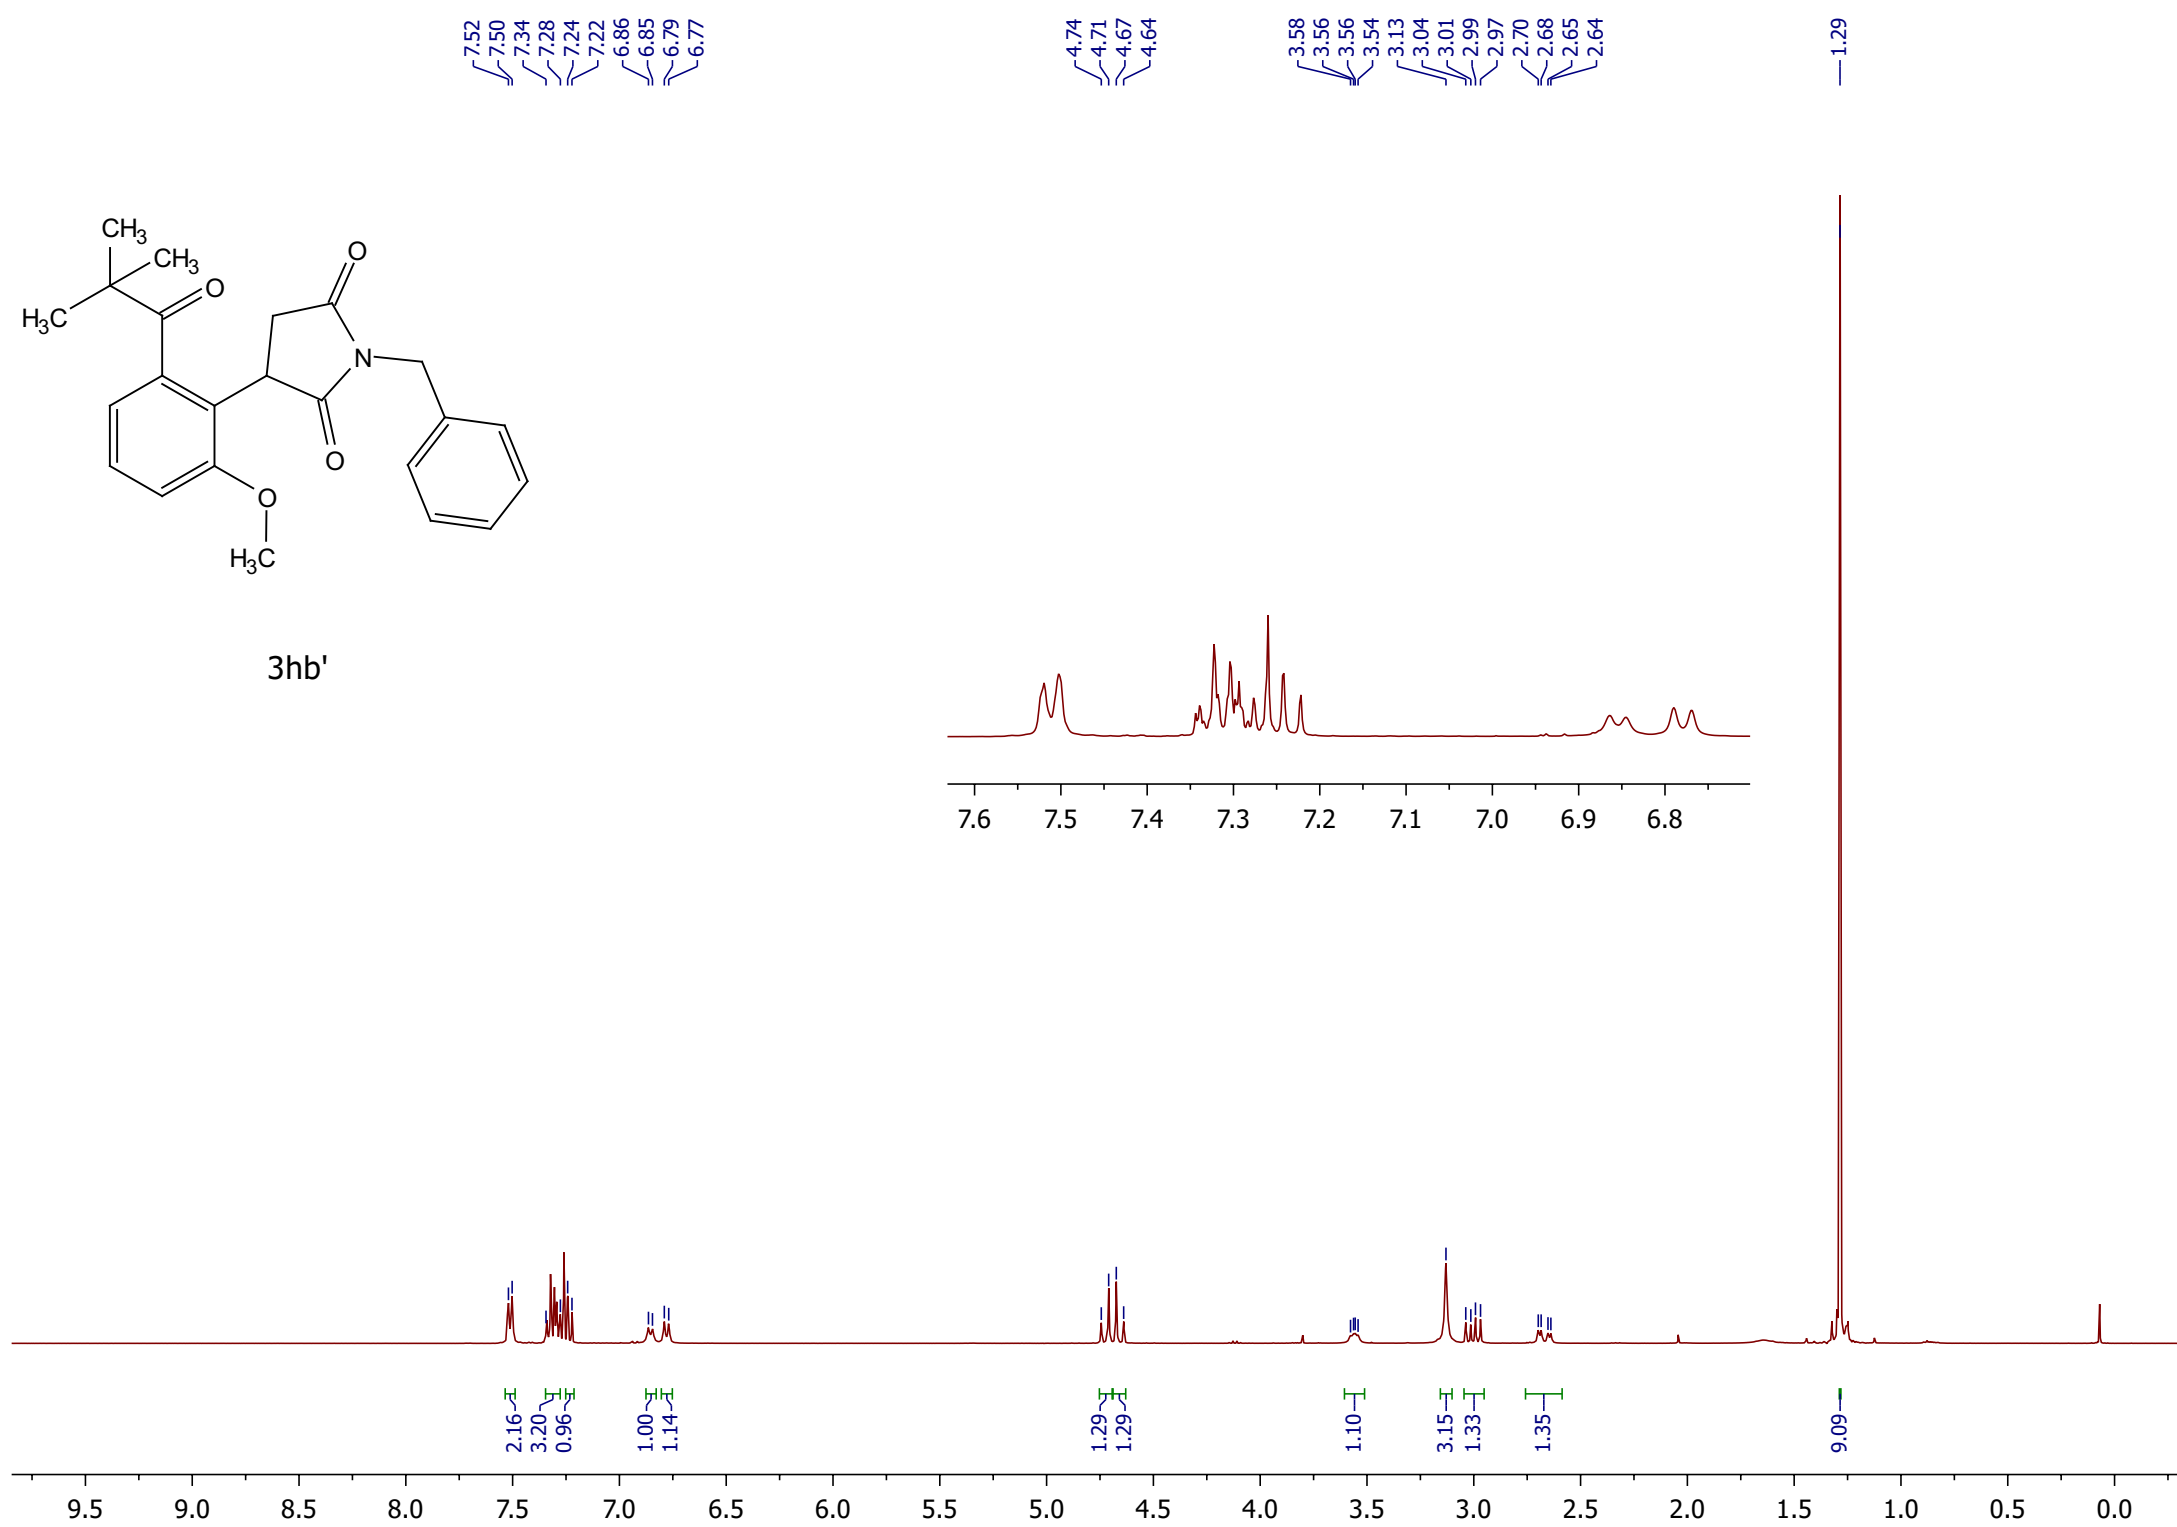

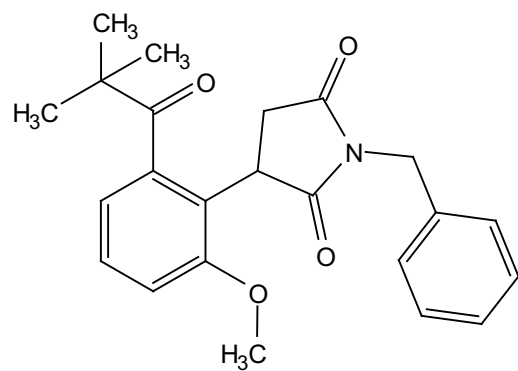

3hb'

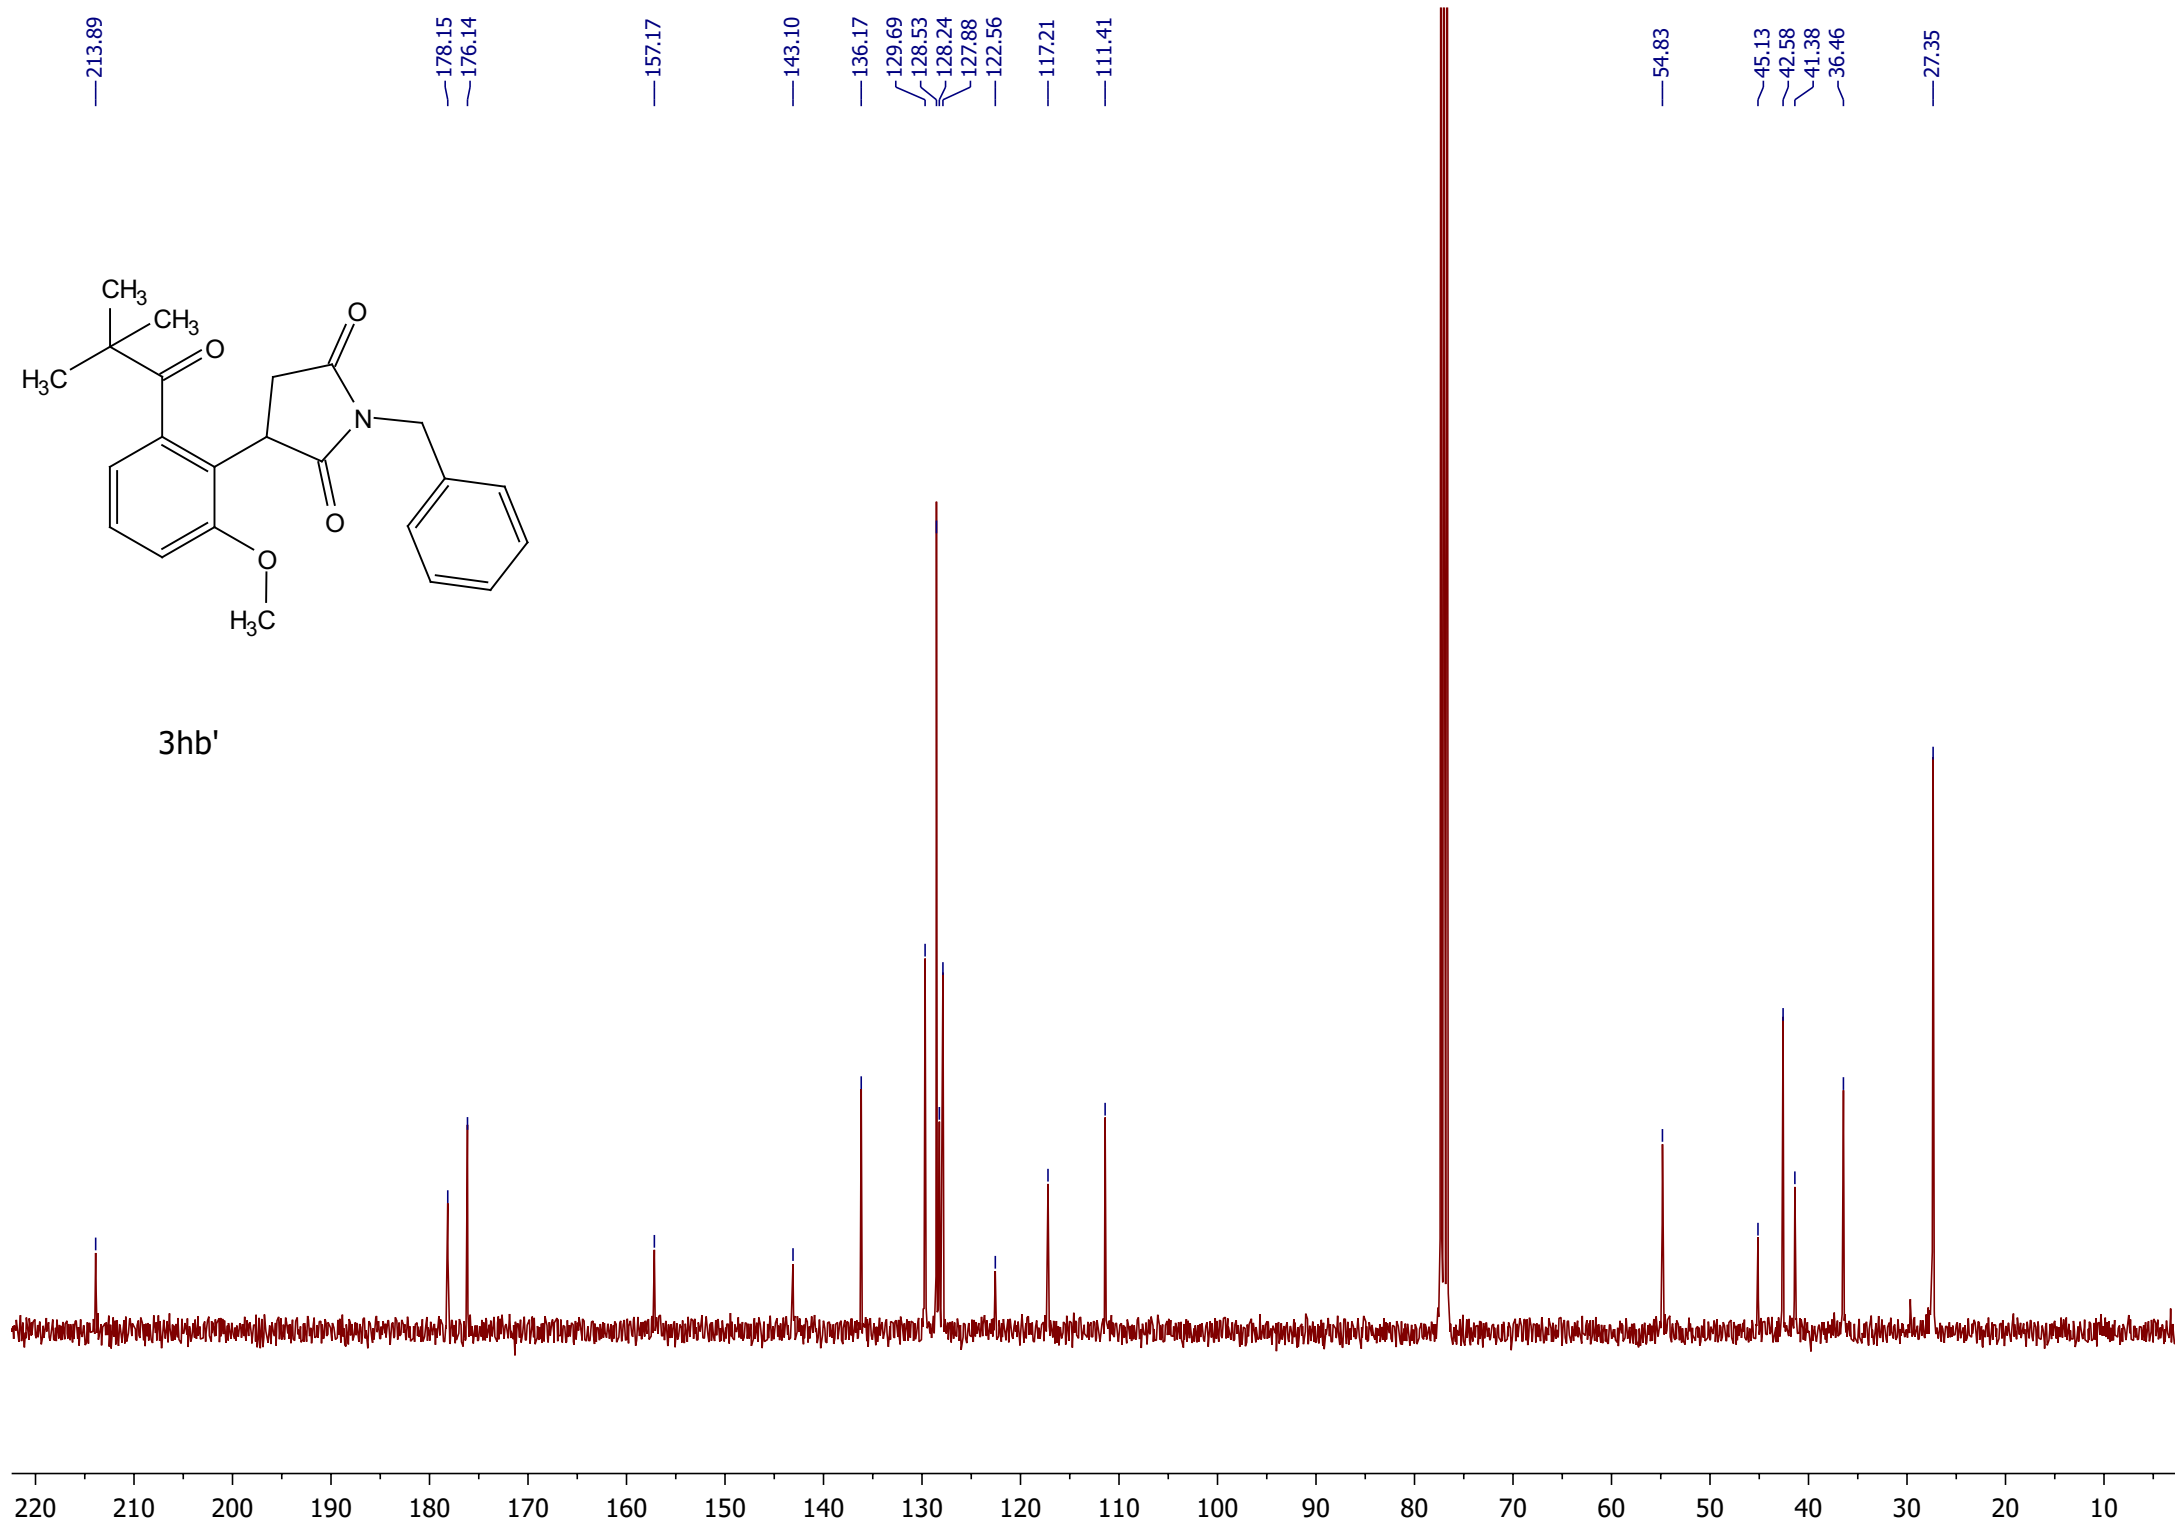

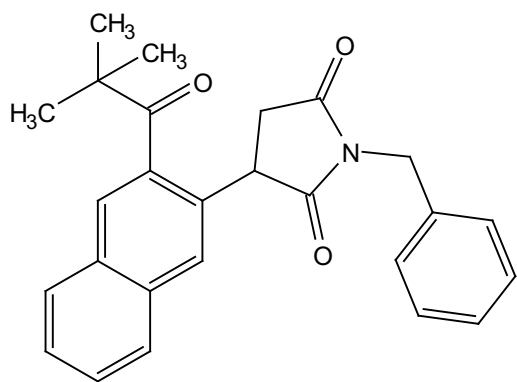

3ib

7.99  
7.85  
7.82  
7.67  
7.65  
7.55  
7.48  
7.38  
7.30

4.82  
4.79  
4.78  
4.74  
4.14  
4.13  
4.12  
4.10

3.26  
3.23  
3.21  
3.19  
2.92  
2.91  
2.88  
2.86

1.40

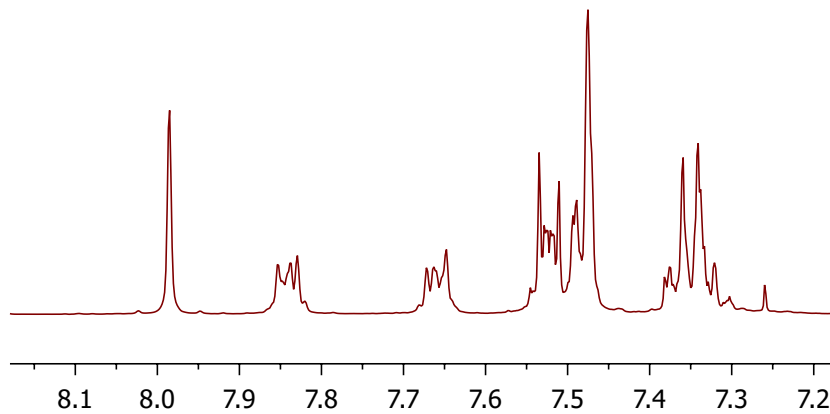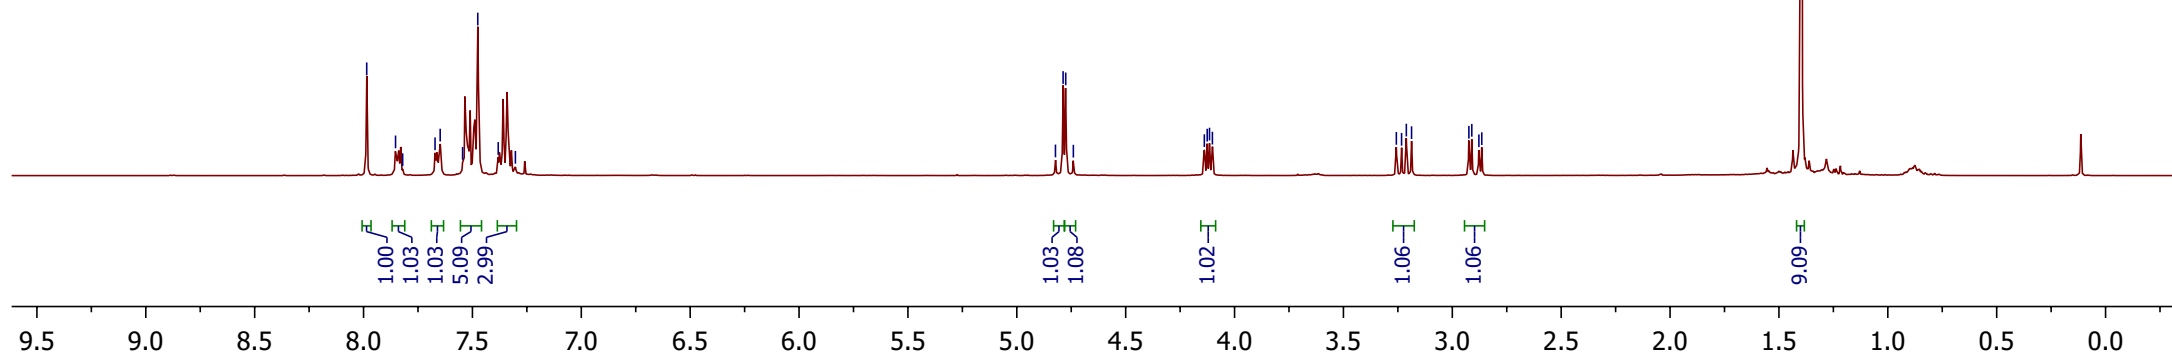

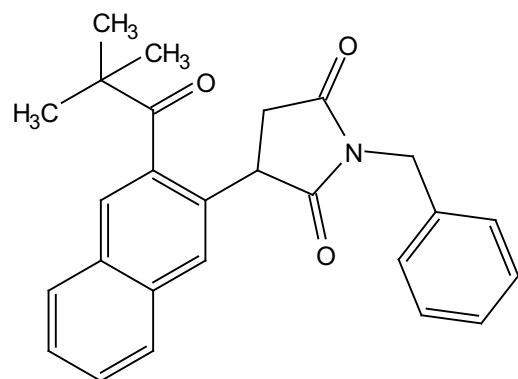

3ib

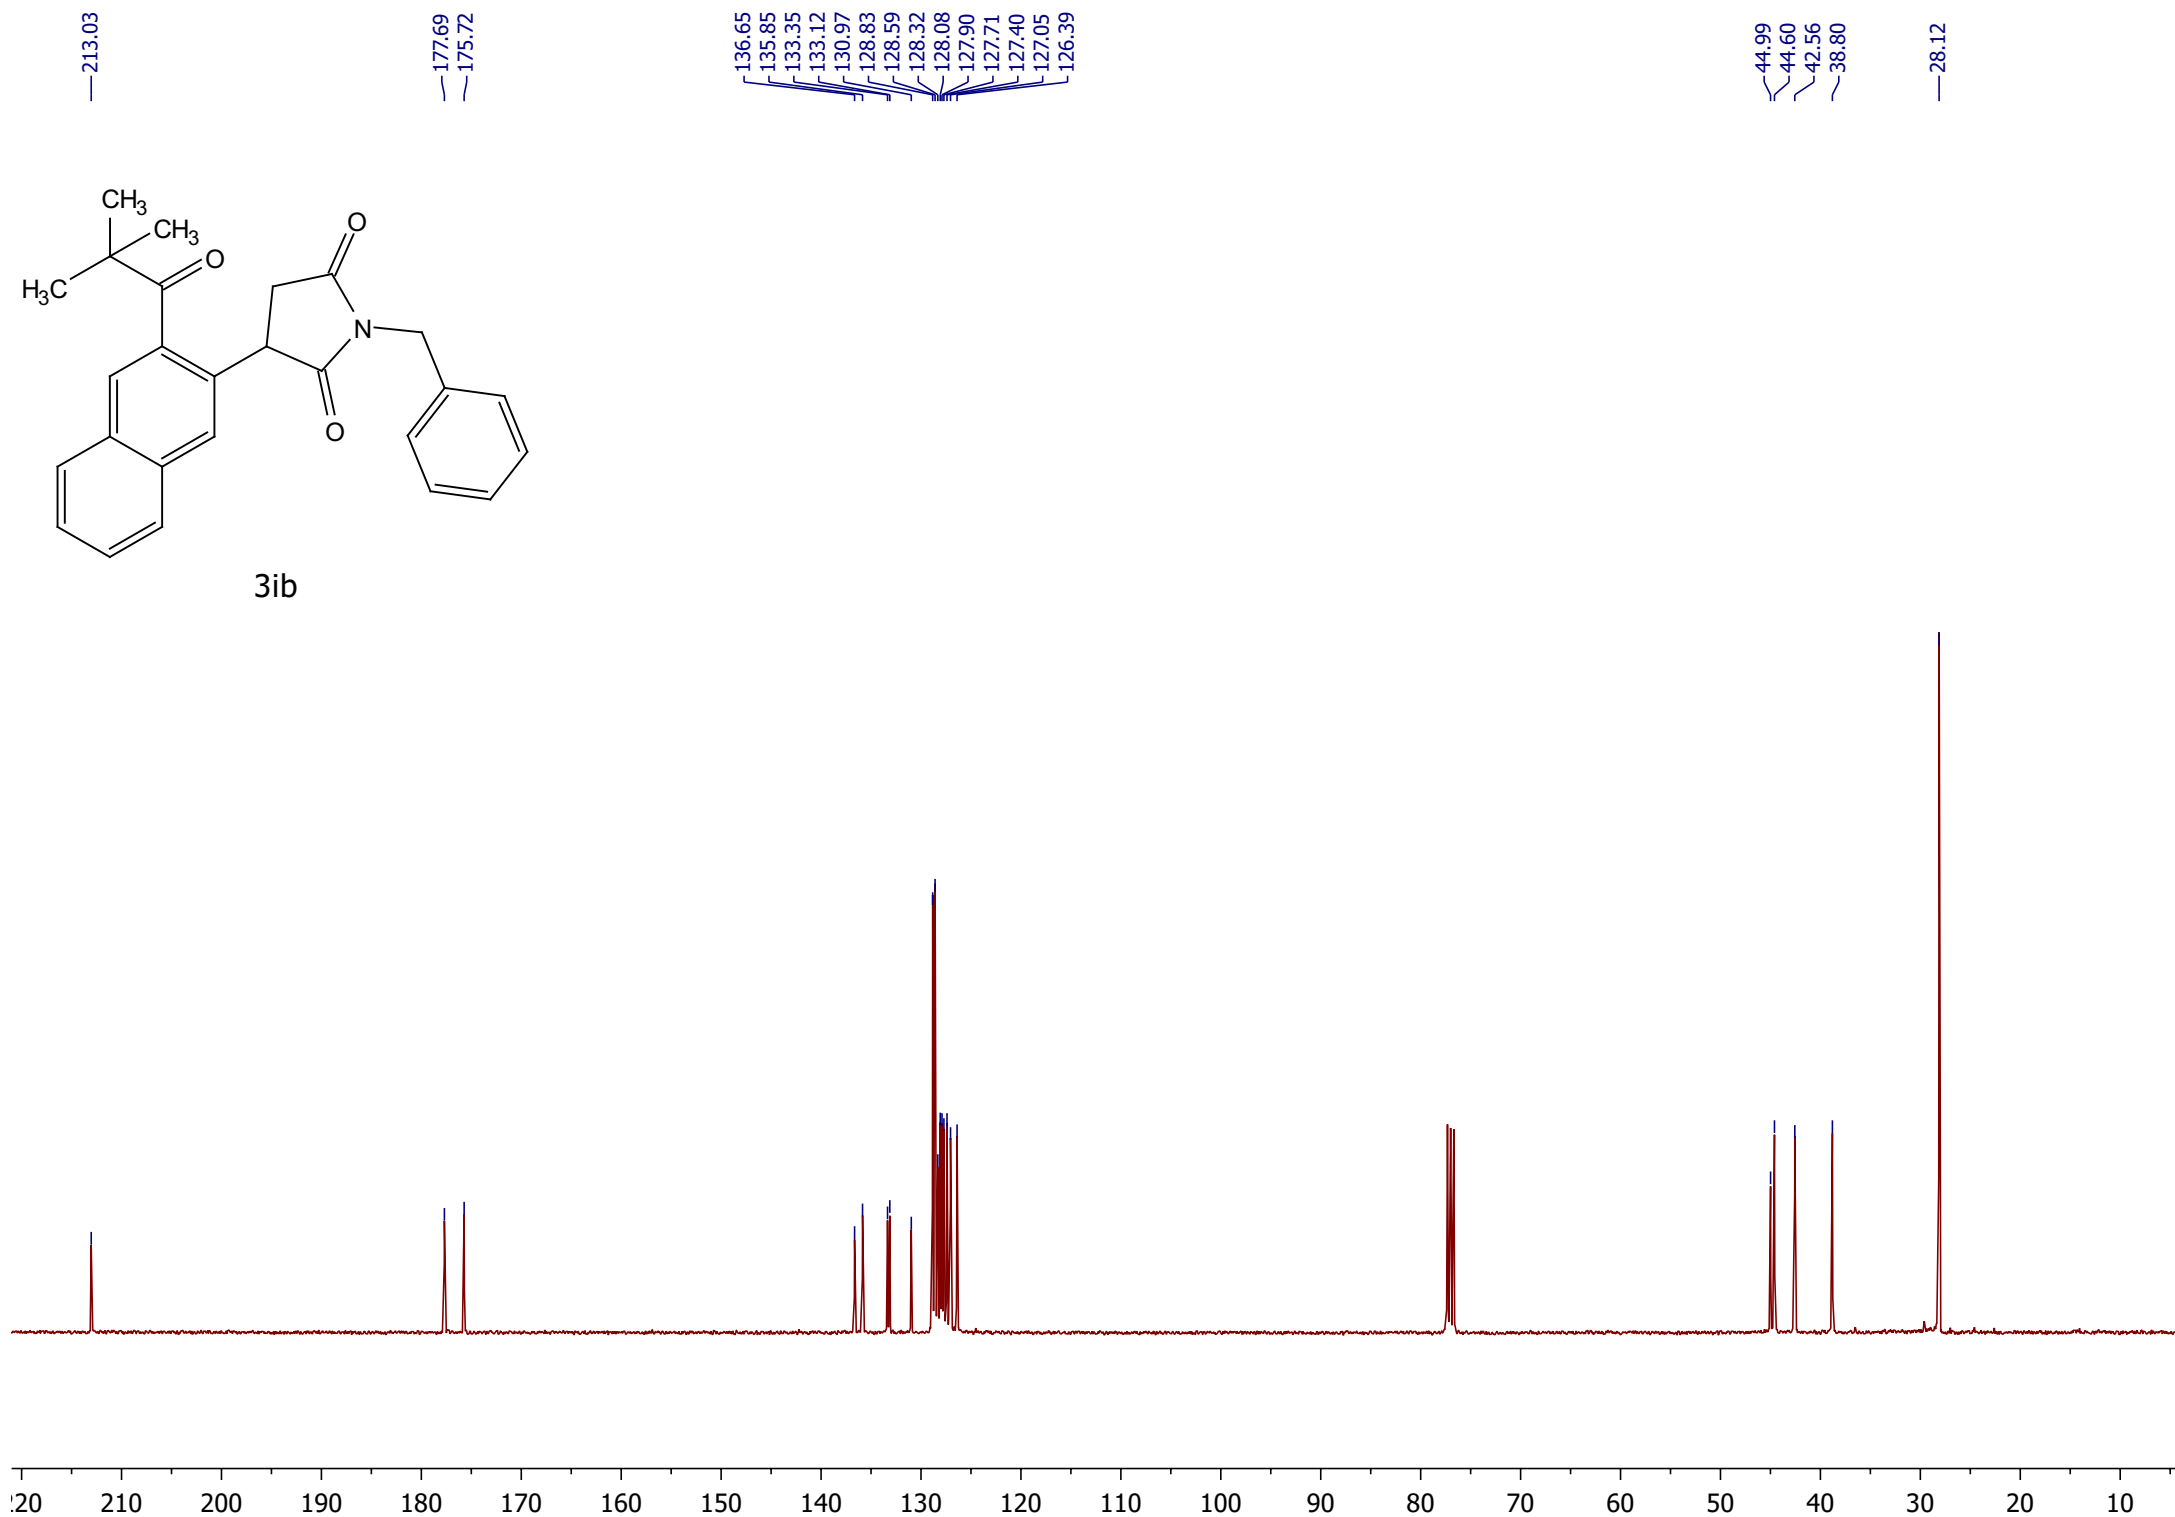

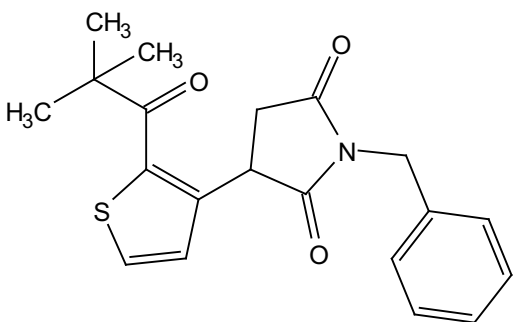

3jb

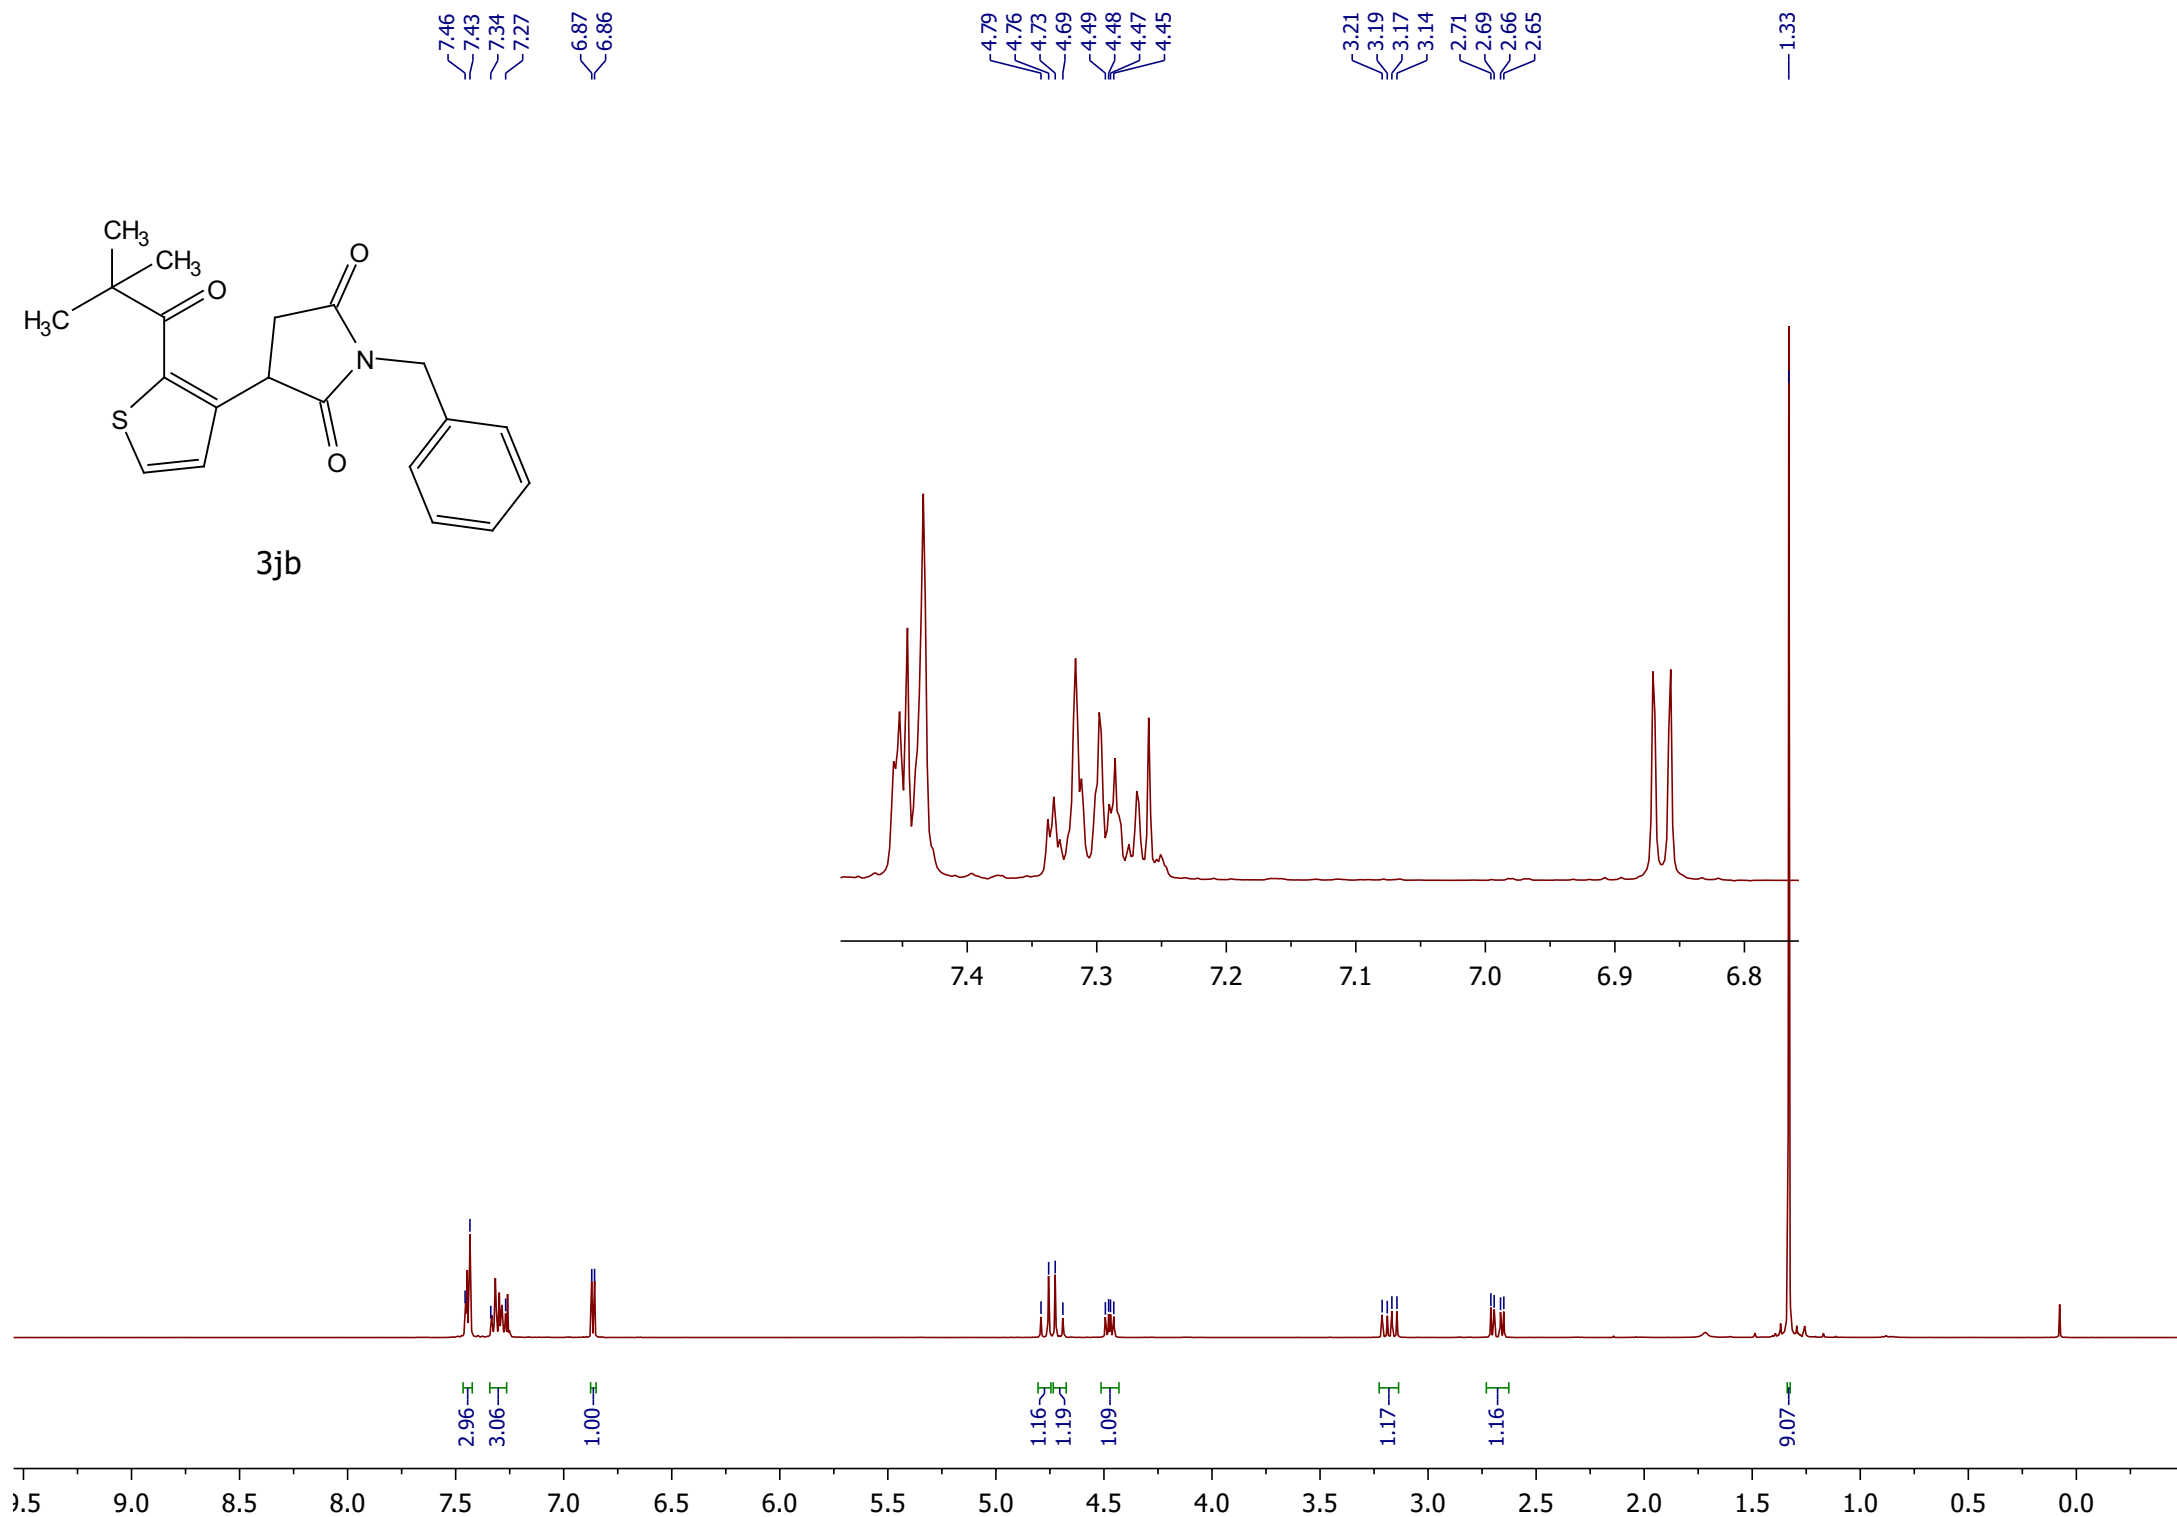

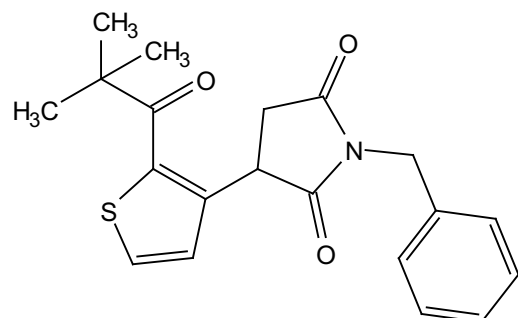

3jb

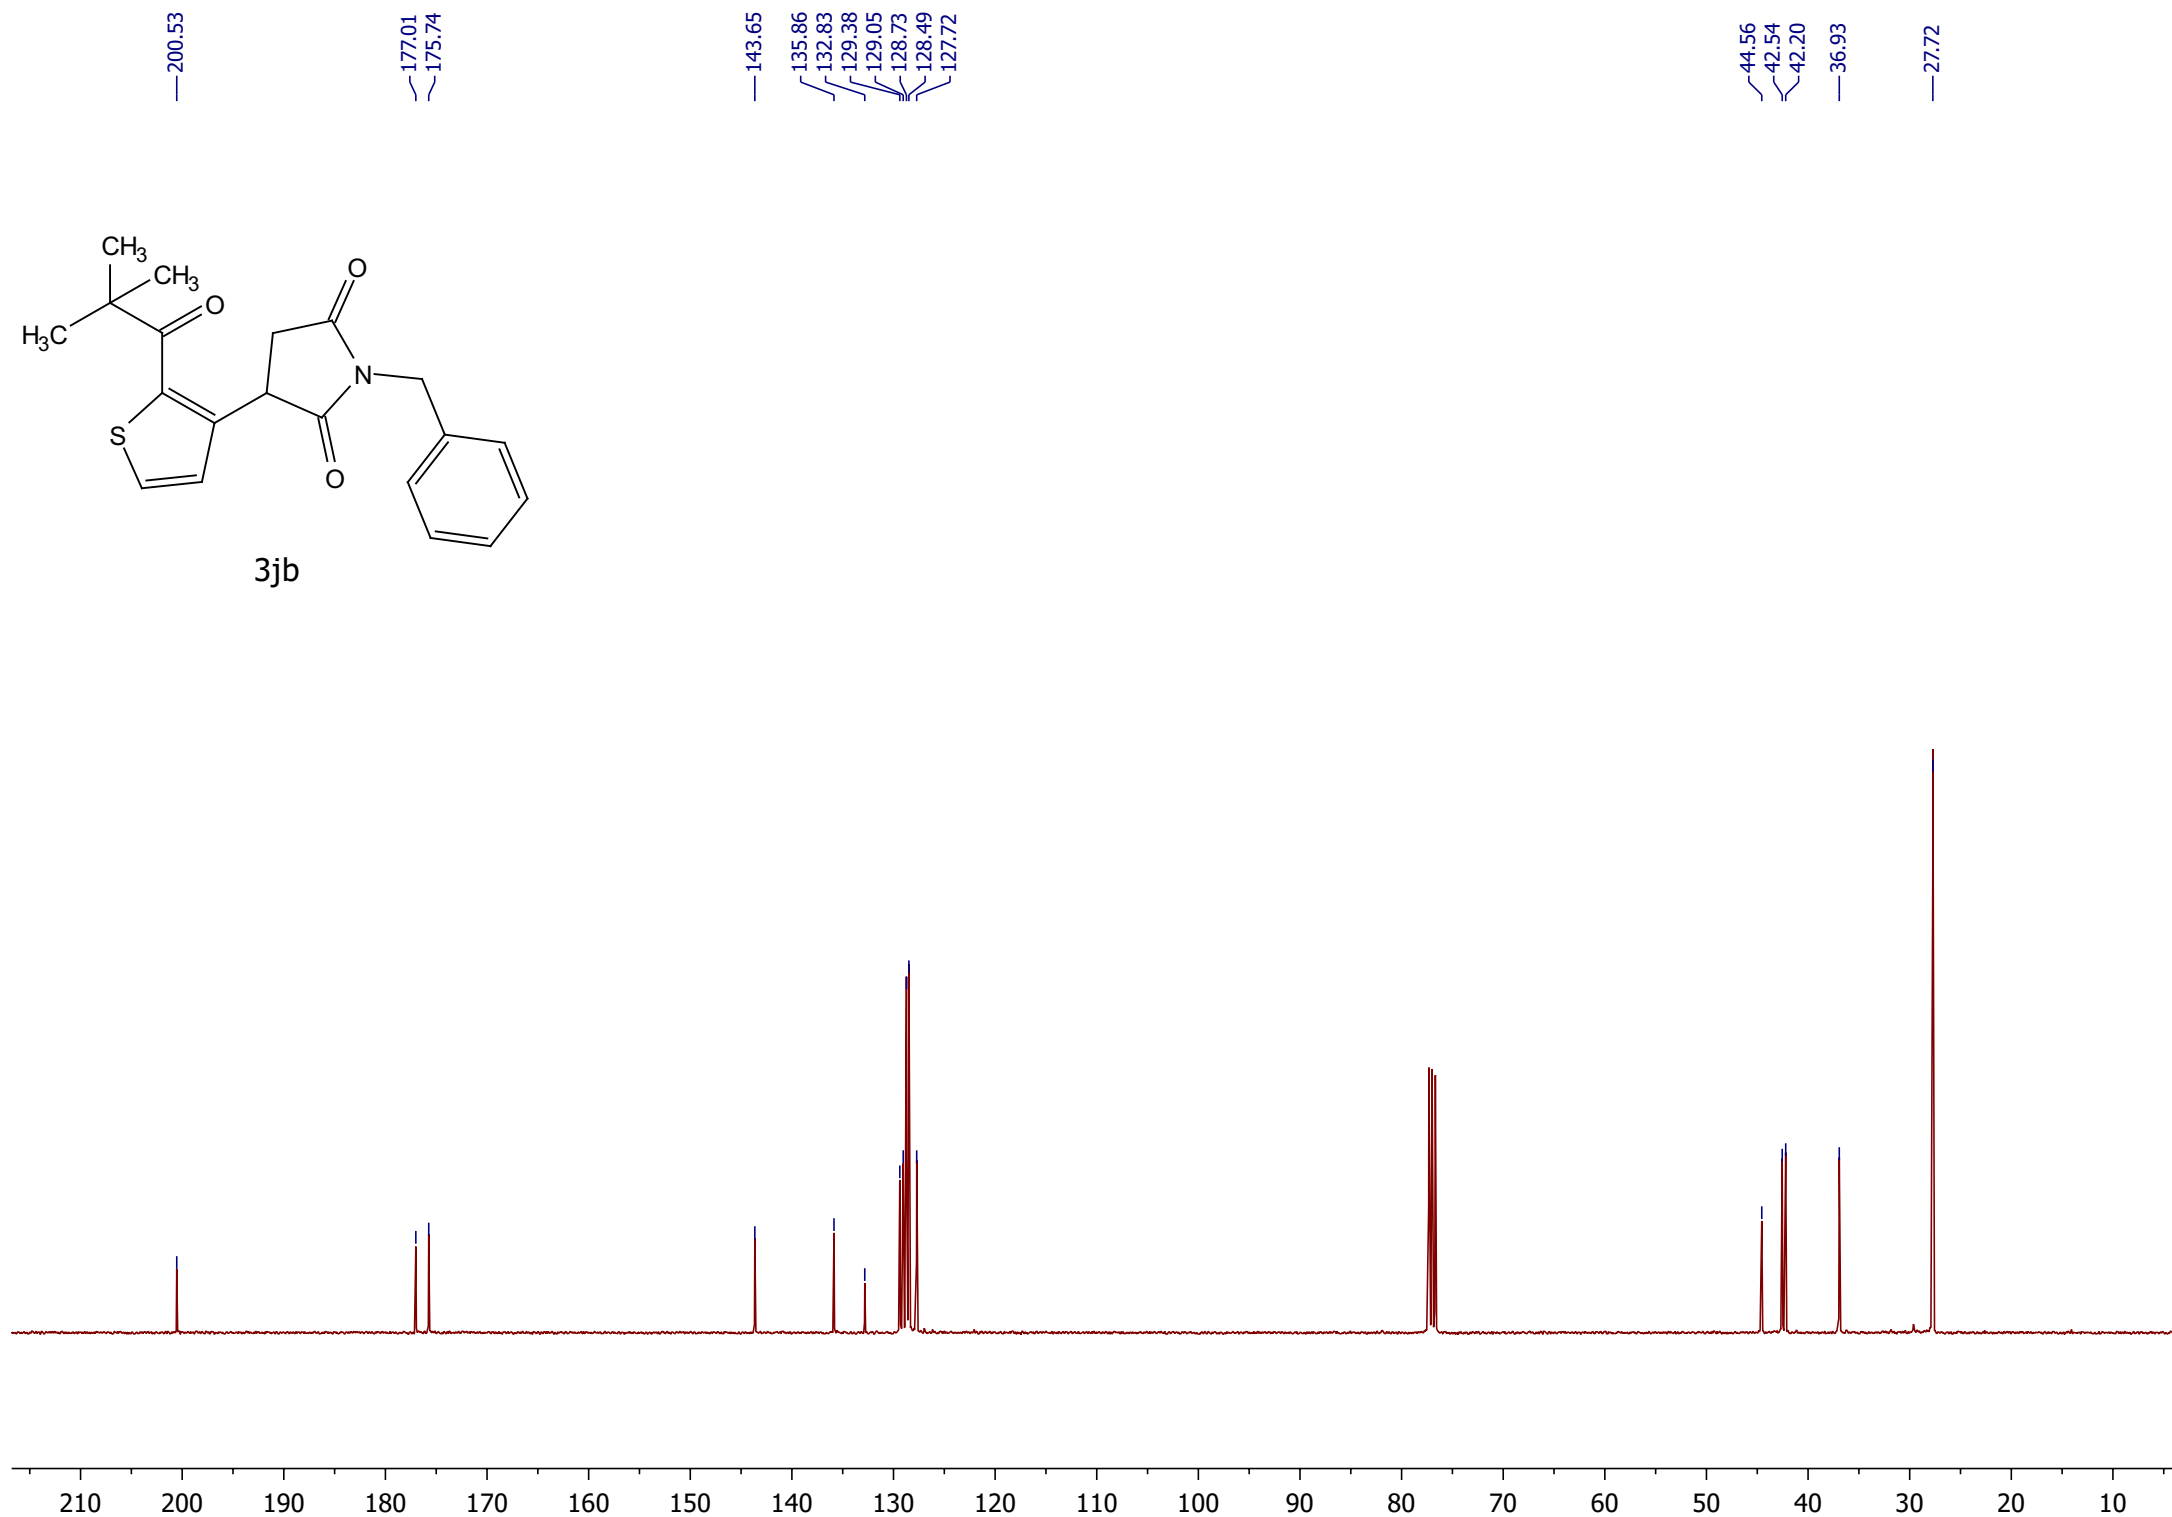

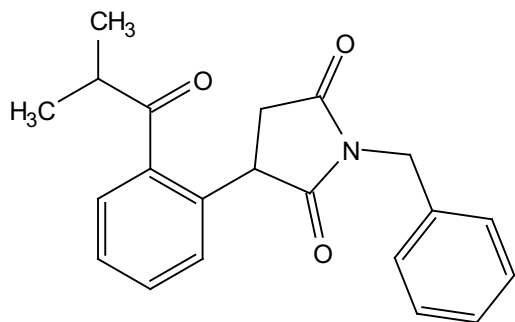

3kb

7.78  
7.77  
7.76  
7.47  
7.39  
7.34  
7.27  
7.16  
7.16  
7.14  
7.14

4.78  
4.76  
4.73  
4.70  
4.27  
4.26  
4.25  
4.24  
3.49  
3.48  
3.47  
3.45  
3.44  
3.43  
3.41  
3.22  
3.20  
3.18  
3.16  
2.81  
2.80  
2.78  
2.77

1.14  
1.13  
1.11

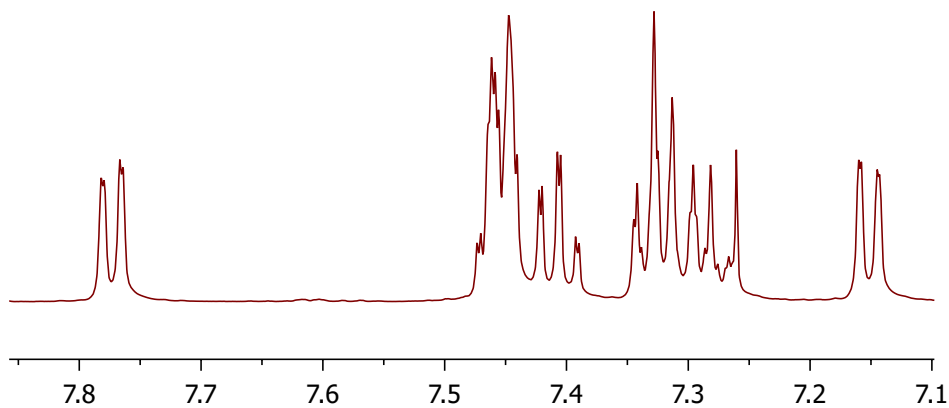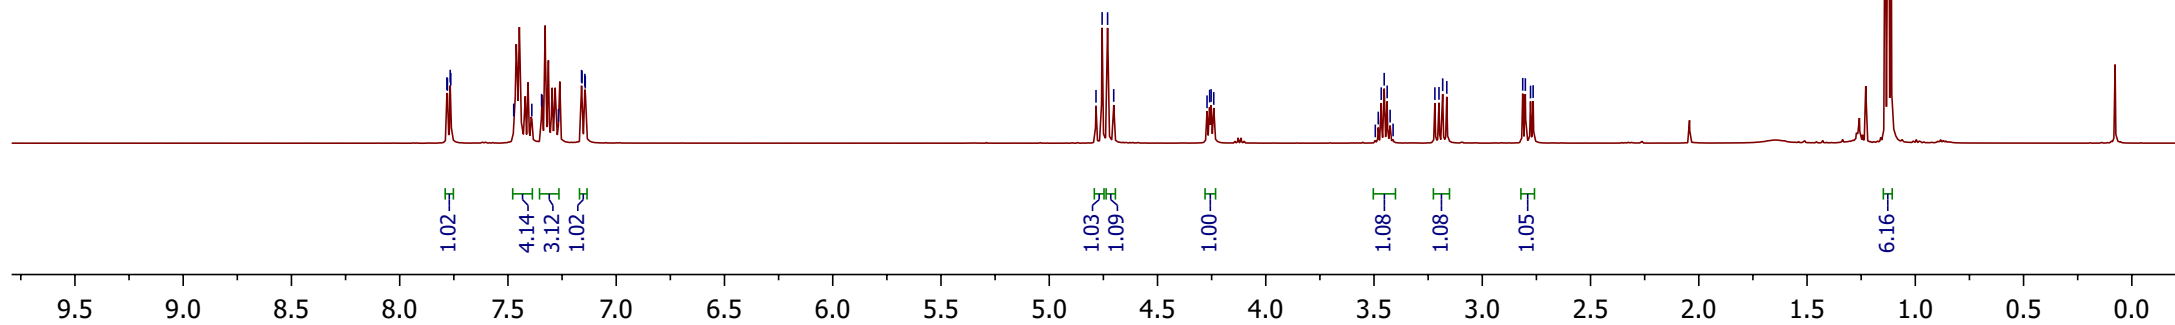

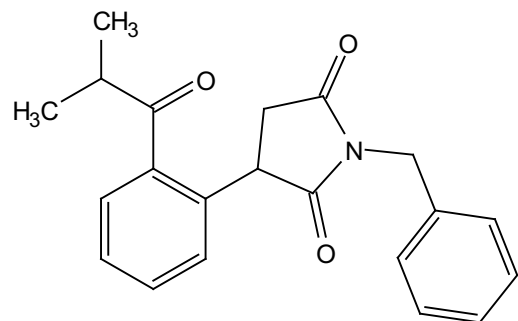

3kb

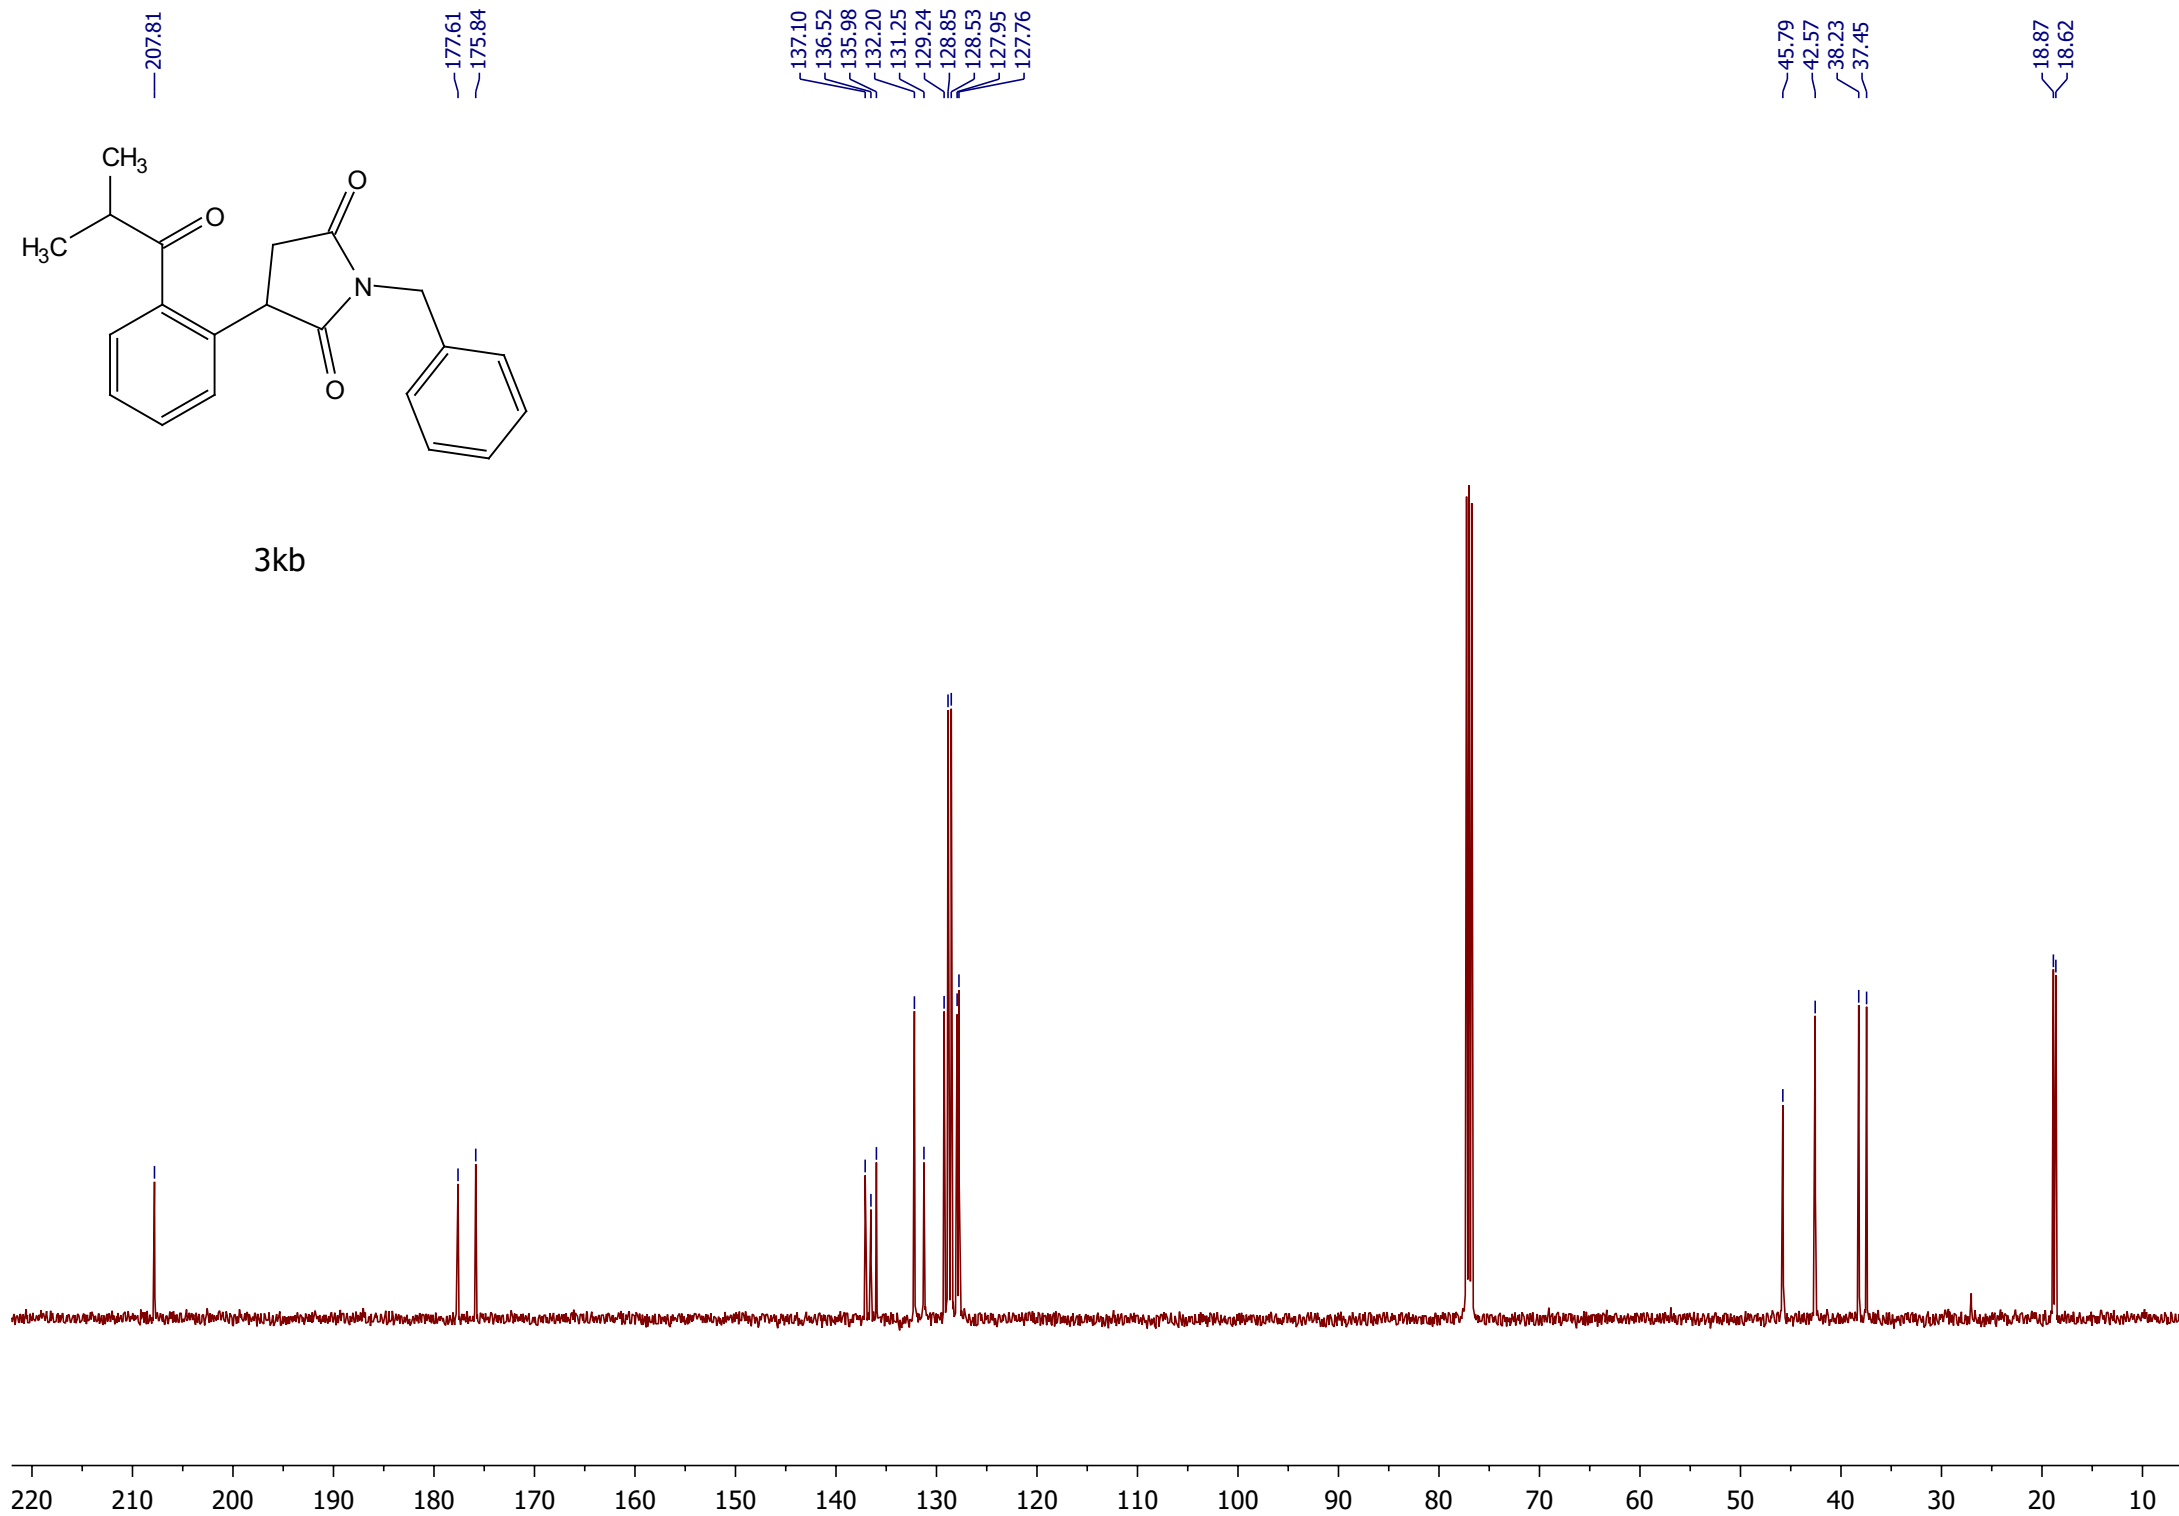

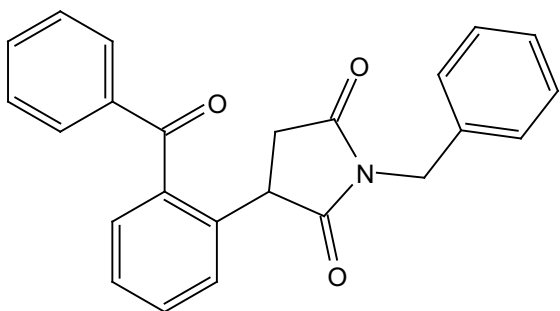

3b

7.79  
7.77  
7.62  
7.60  
7.58  
7.51  
7.42  
7.34  
7.31  
7.26  
7.22  
7.20

4.74  
4.71  
4.67  
4.63  
4.32  
4.31  
4.30  
4.29

3.26  
3.24  
3.22  
3.19  
2.93  
2.92  
2.89  
2.87

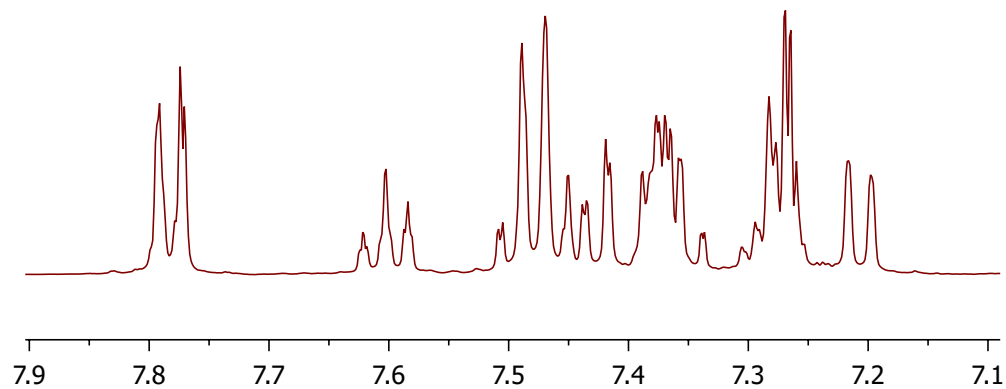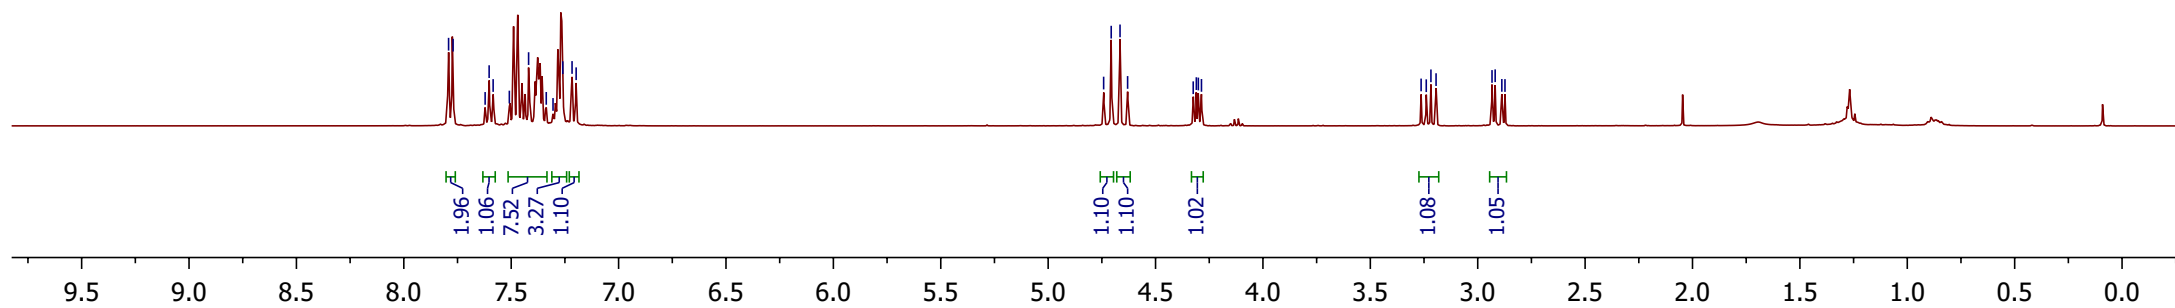

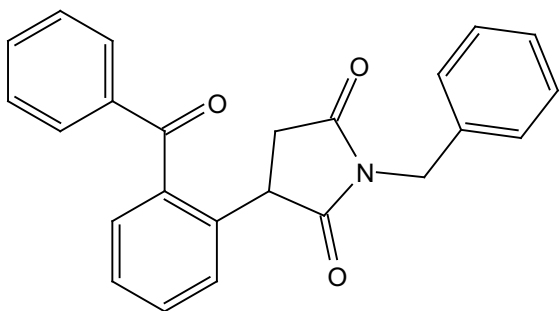

3lb

197.83

177.62  
175.62

137.63  
137.32  
137.29  
135.73  
133.21  
131.63  
130.68  
130.39  
129.64  
128.77  
128.51  
128.35  
127.79  
127.01

44.59  
42.57  
38.34

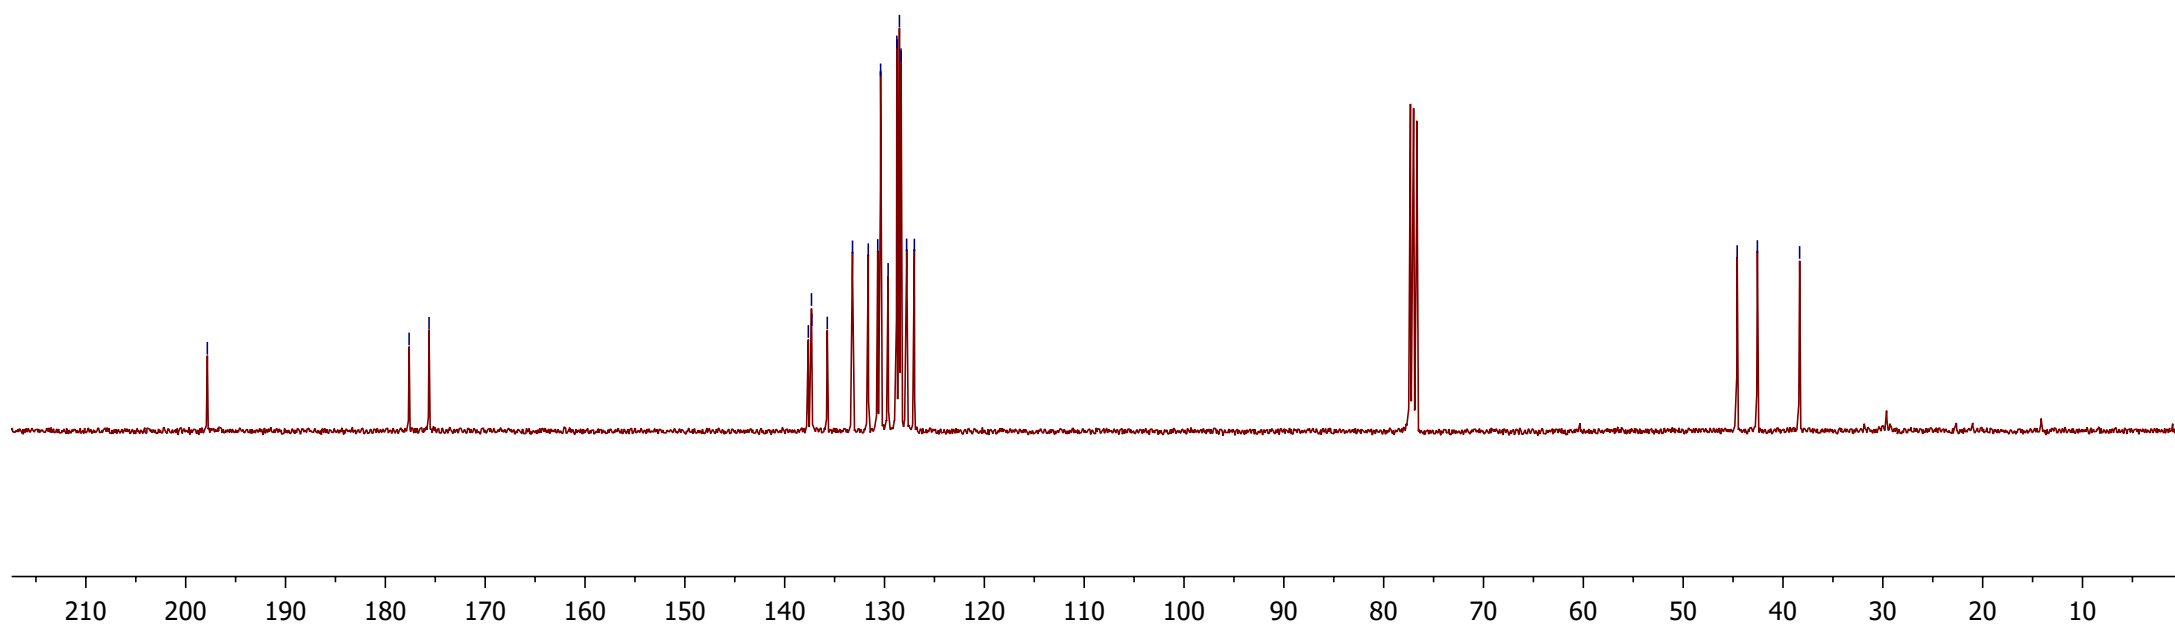

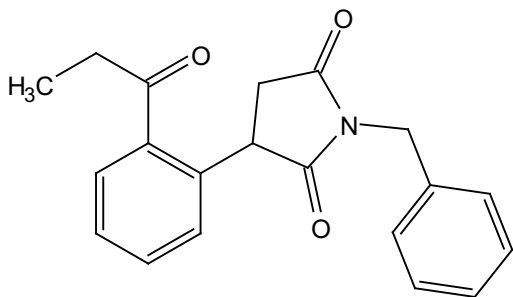

3mb

7.8  
7.8  
7.7  
7.7  
7.4  
7.4  
7.3  
7.3  
7.3  
7.2  
7.1  
7.1  
7.1  
7.1

4.8  
4.7  
4.7  
4.6  
4.3  
4.3  
4.3  
4.3

3.2  
3.2  
3.1  
3.1  
2.9  
2.9  
2.9  
2.9  
2.8  
2.8  
2.7  
2.7

1.1  
1.0

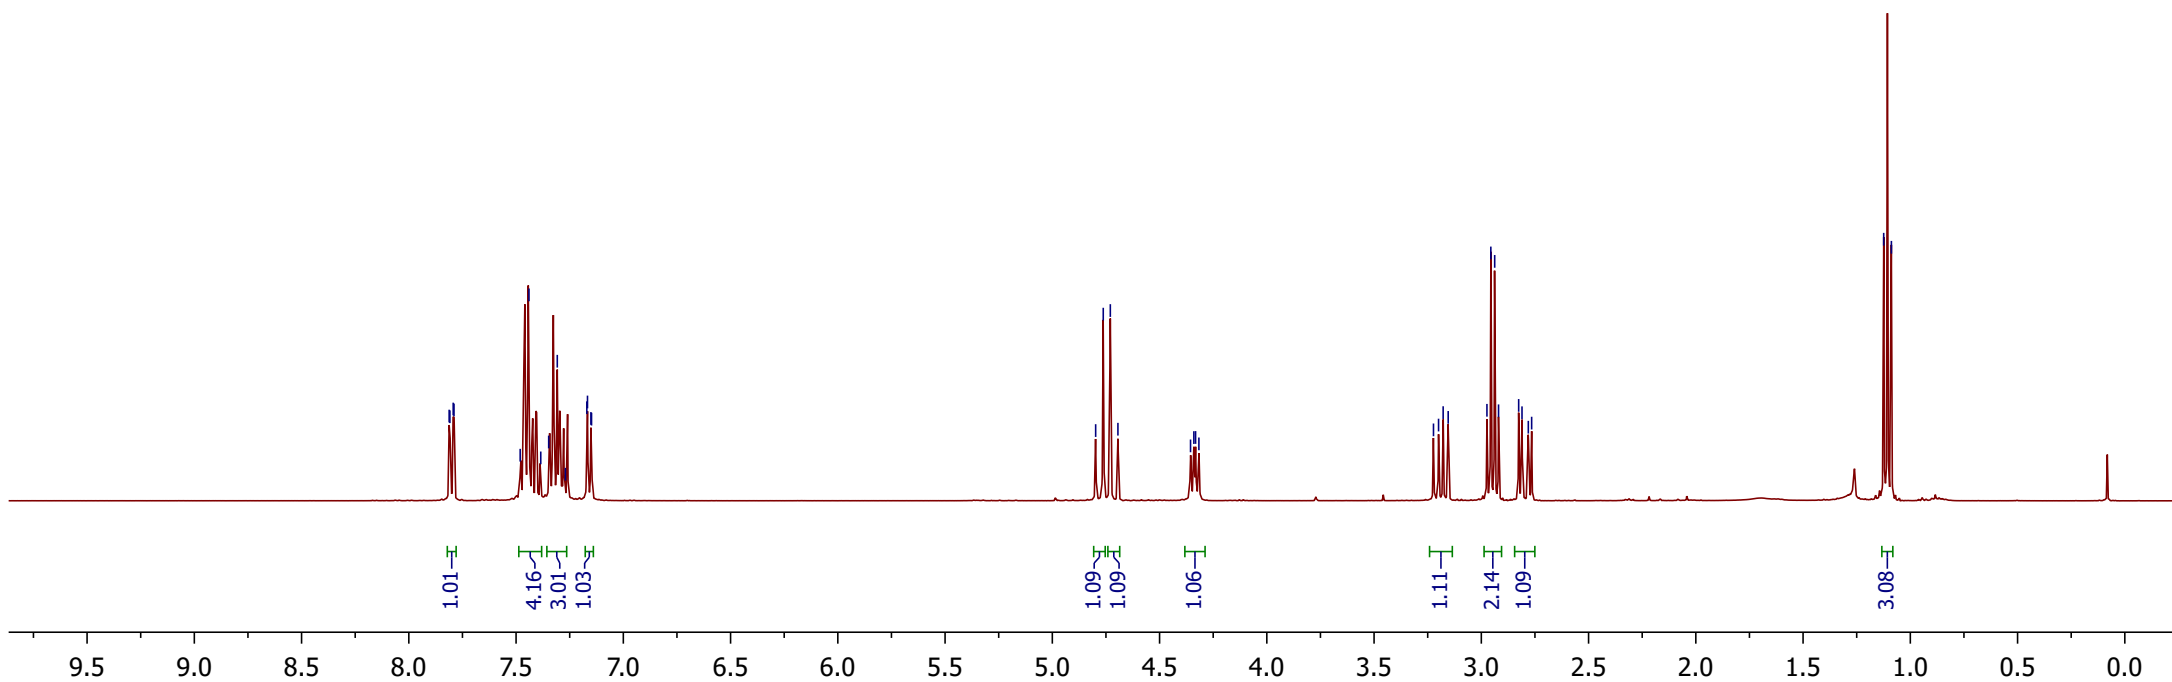

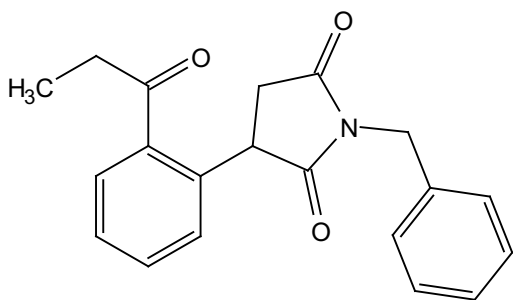

3mb

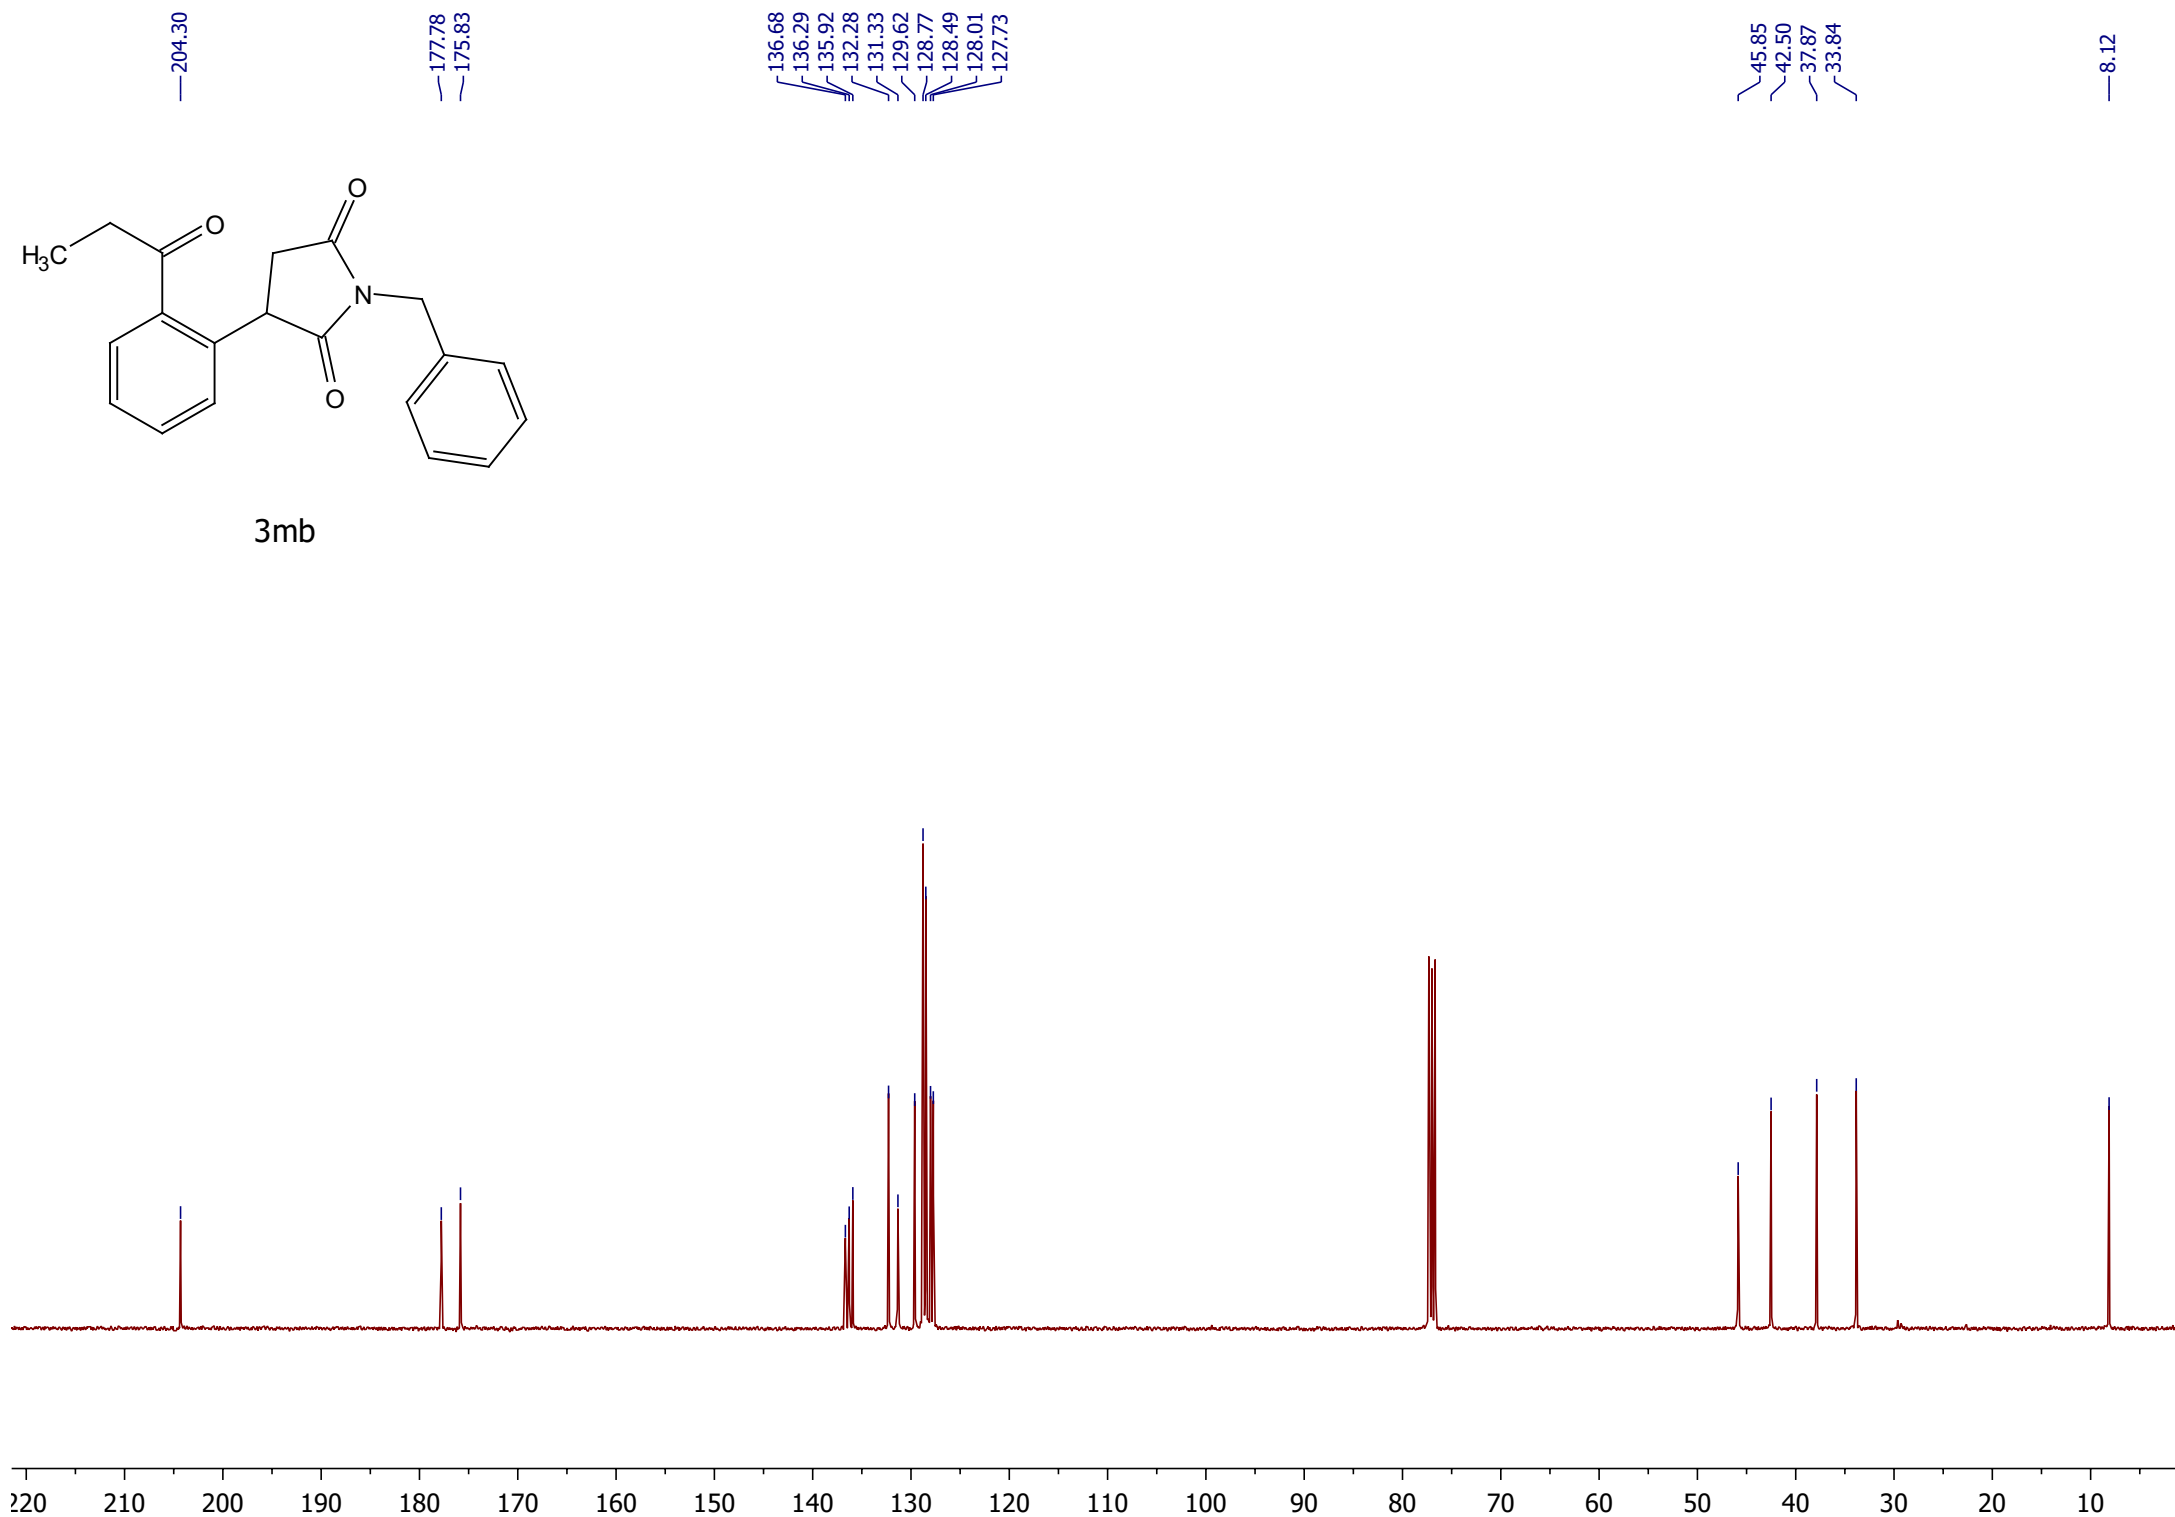

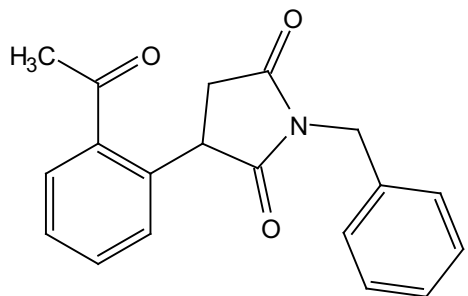

3nb

7.86  
7.86  
7.84  
7.84  
7.51  
7.45  
7.41  
7.35  
7.31  
7.28  
7.18  
7.16  
7.16

4.81  
4.77  
4.74  
4.71  
4.41  
4.39  
4.38  
4.37

3.22  
3.20  
3.17  
3.15  
2.78  
2.76  
2.73  
2.72  
2.57

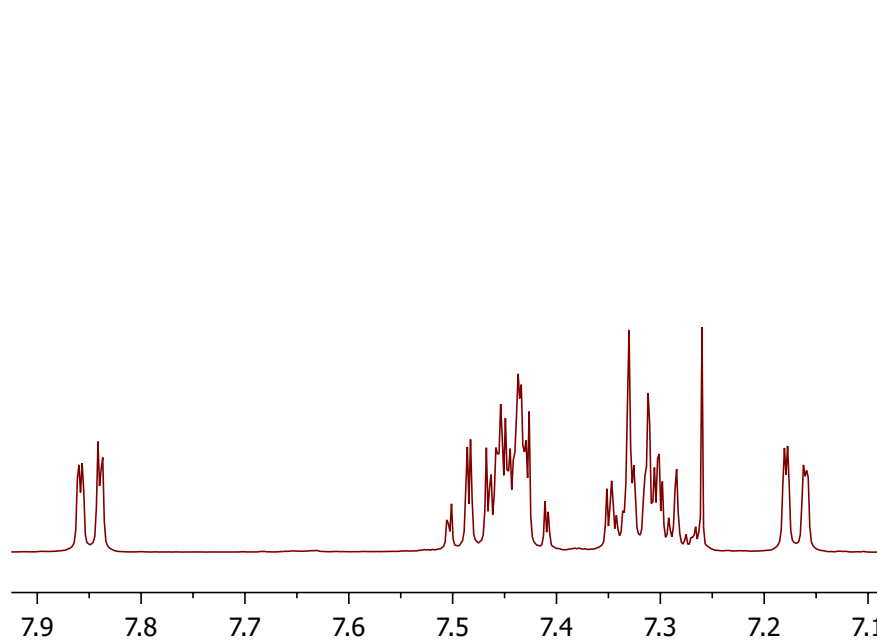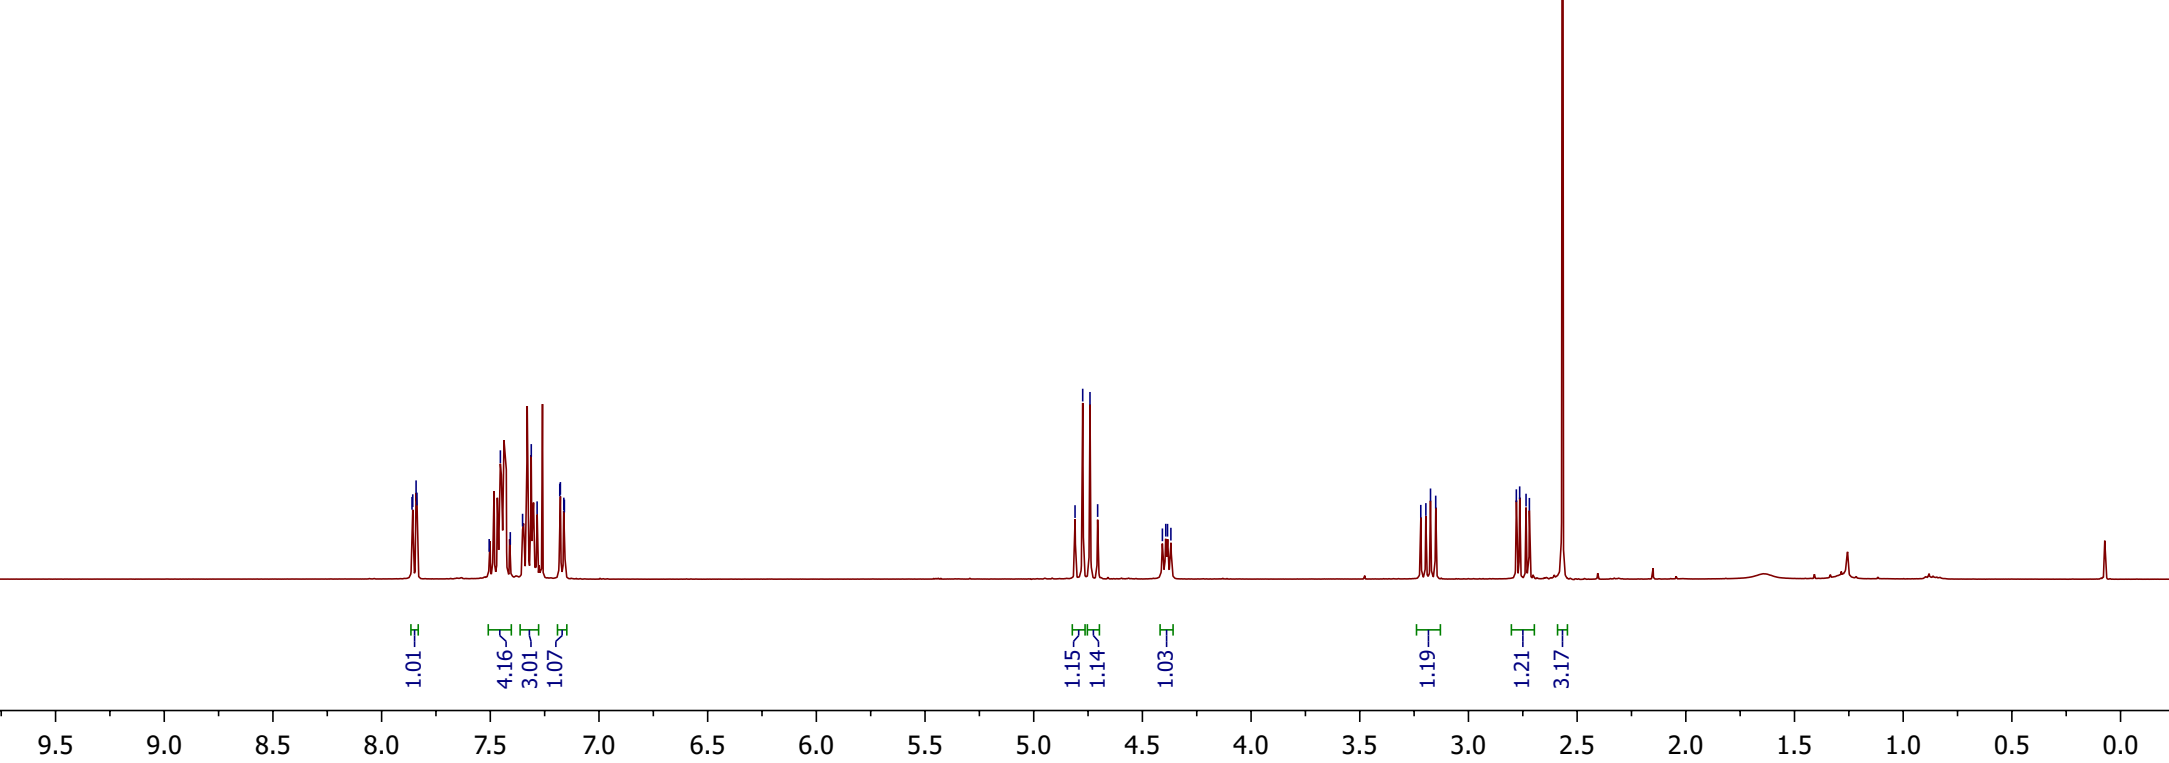

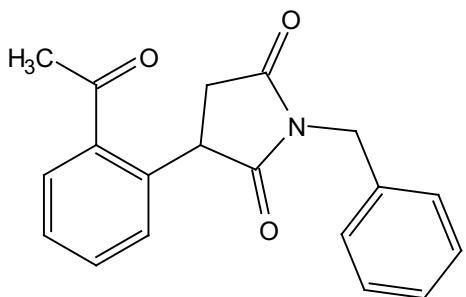

3nb

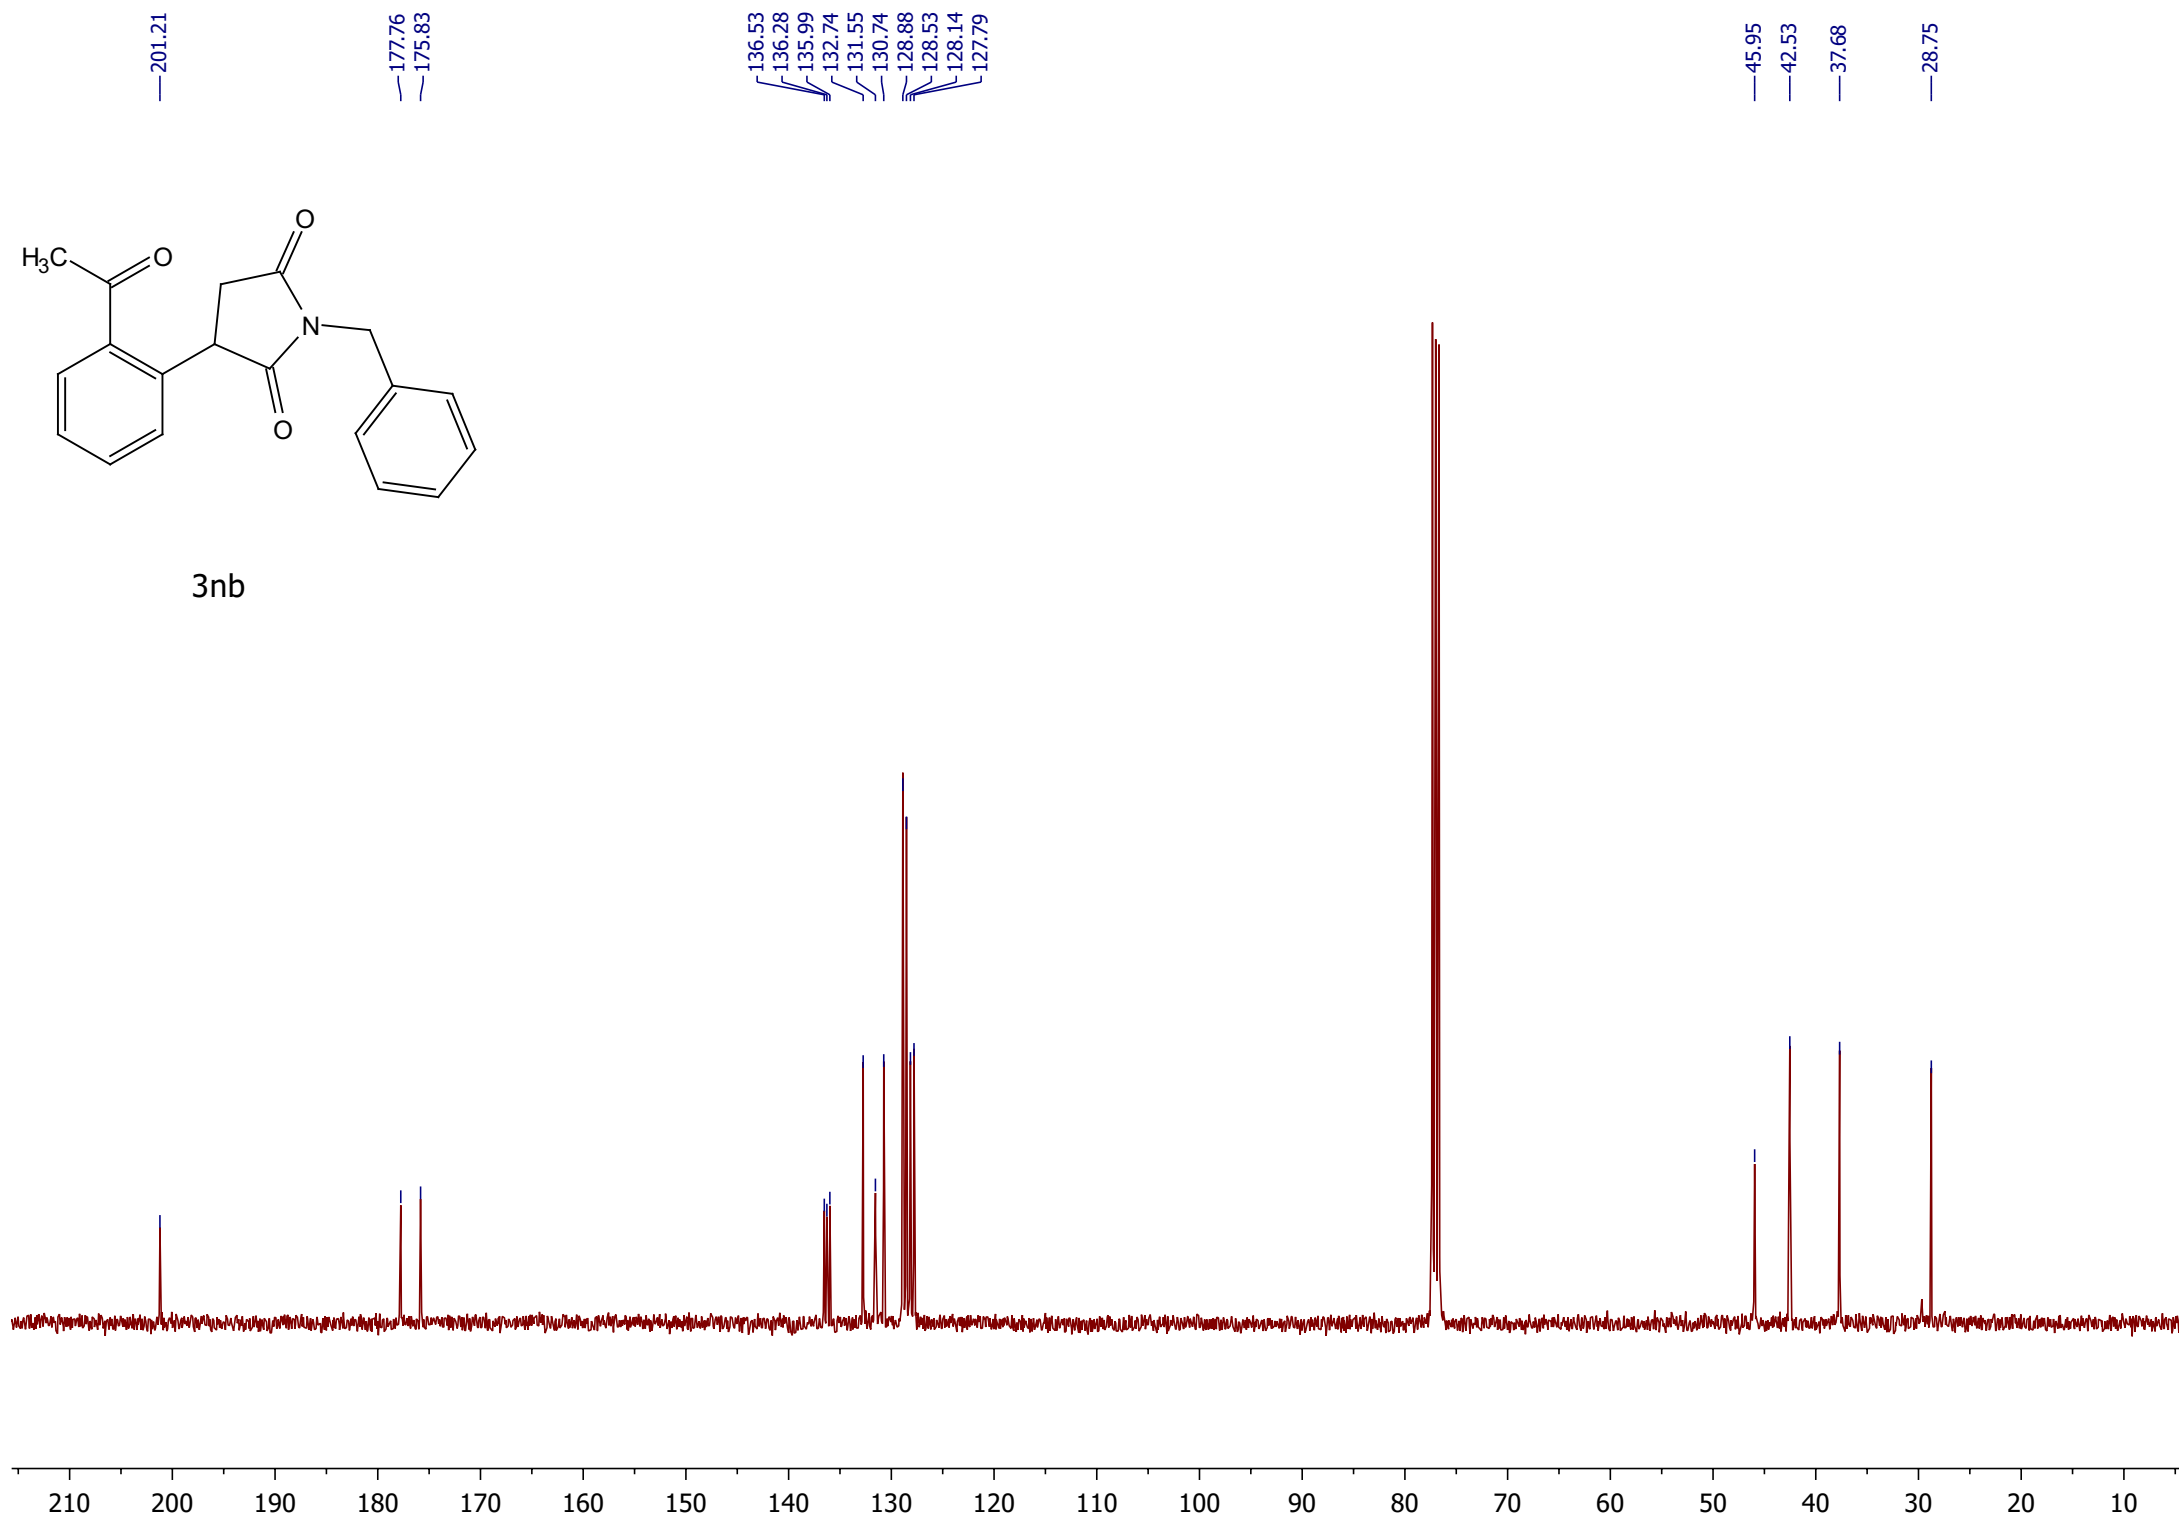

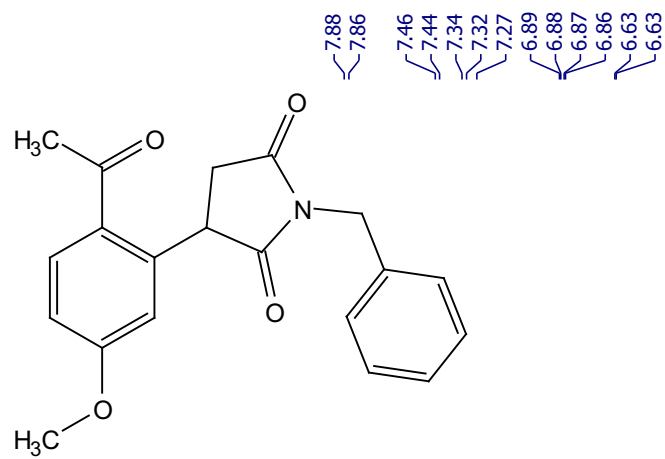

3ob

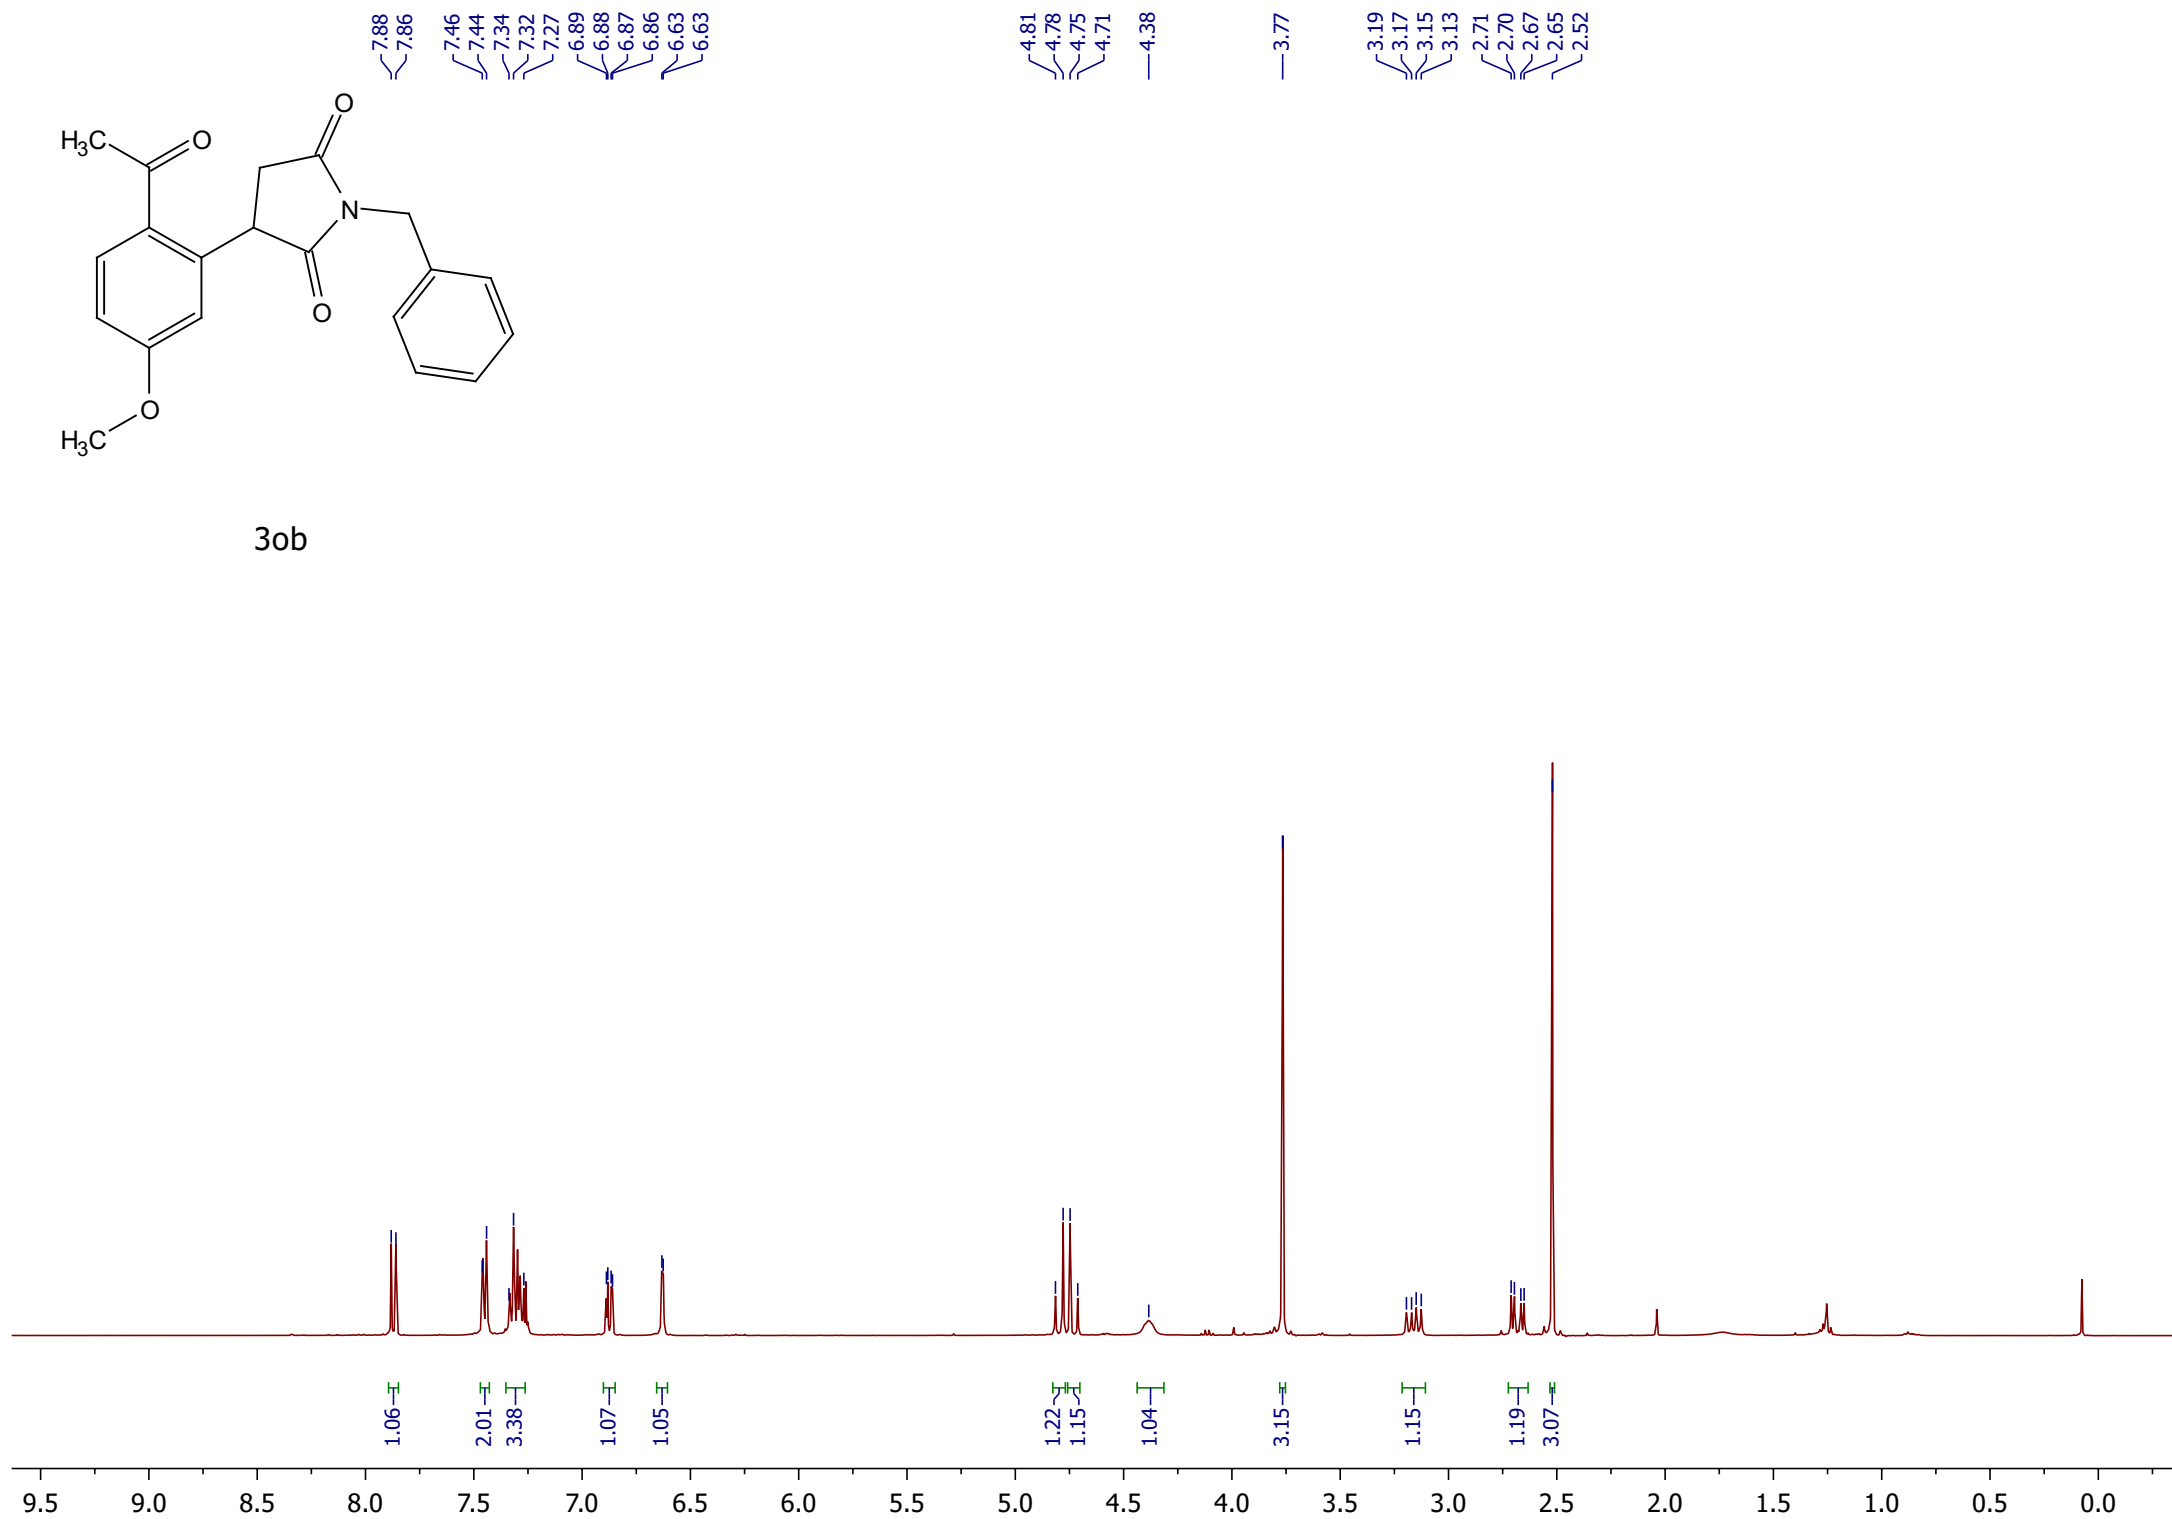

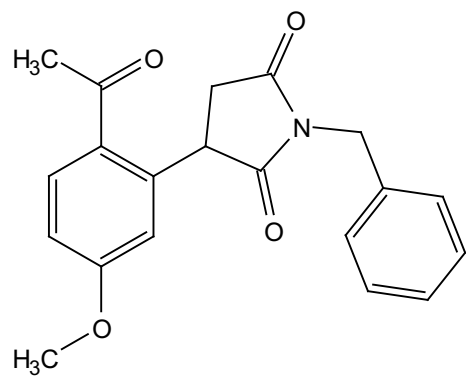

3b

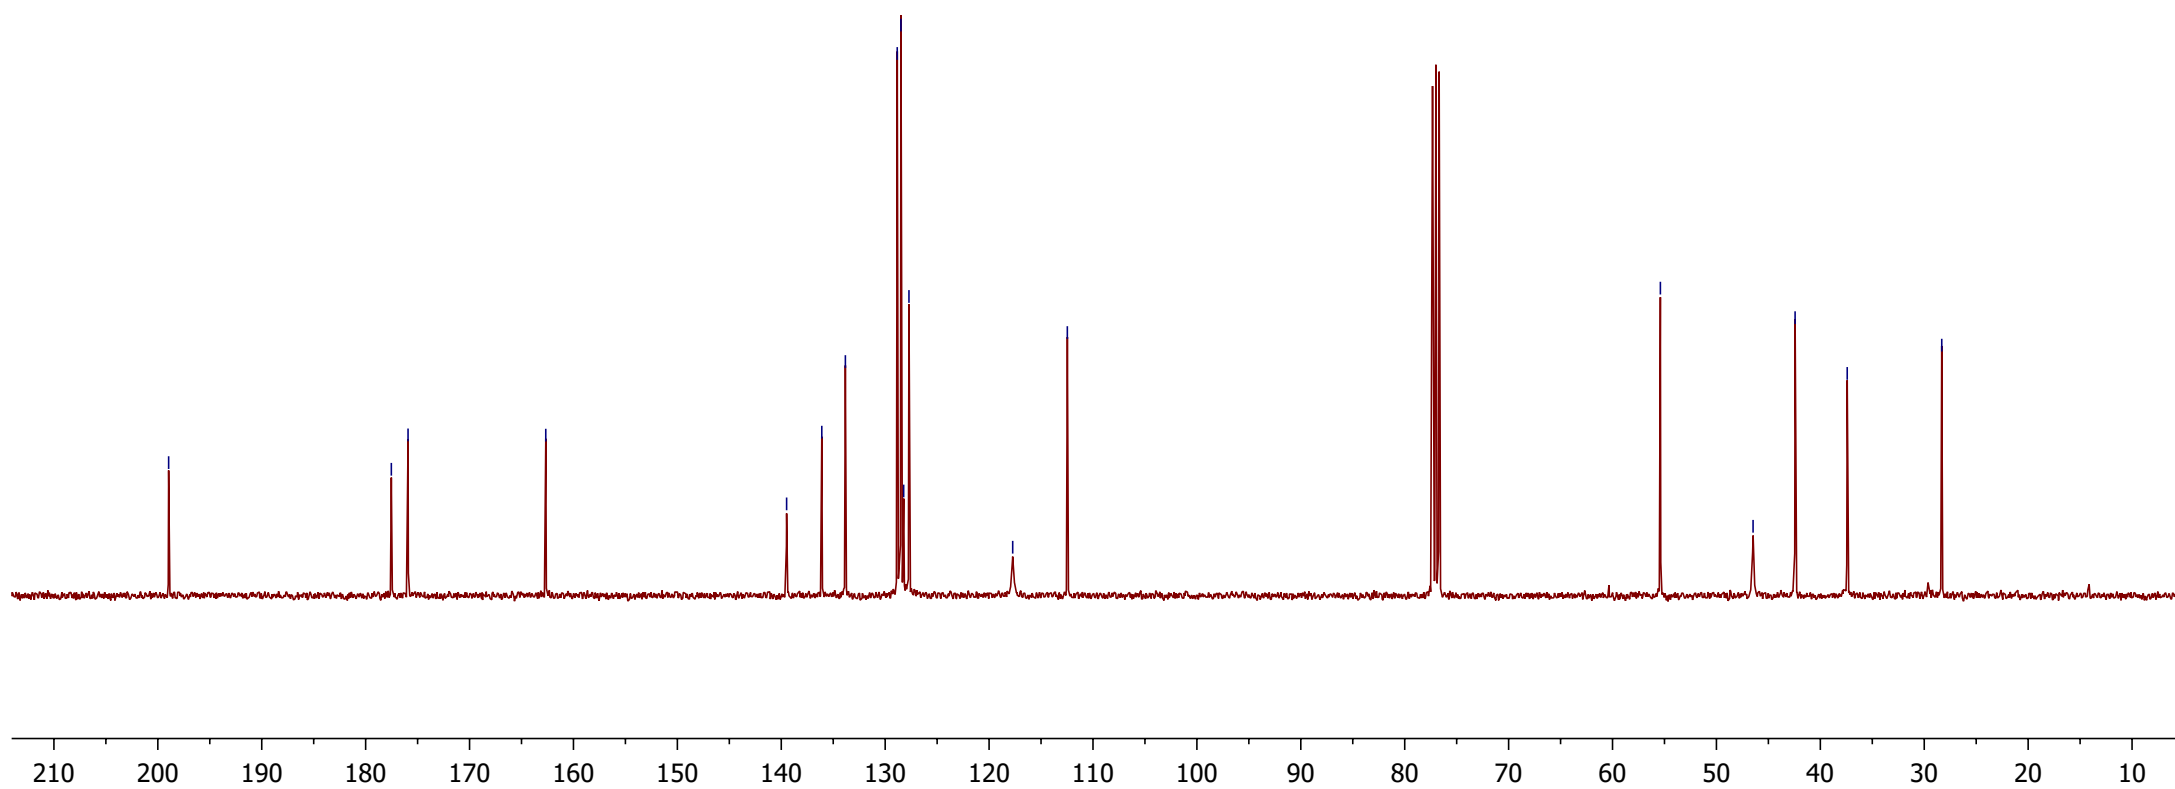

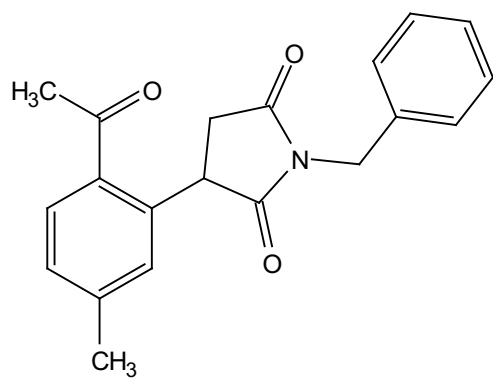

3pb

7.77, 7.75, 7.46, 7.44, 7.34, 7.32, 7.27, 7.22, 7.21, 7.20, 7.20, 6.92, 4.81, 4.78, 4.75, 4.72, 4.38, 4.37, 4.36, 4.35, 3.18, 3.17, 3.15, 3.13, 2.72, 2.71, 2.68, 2.67, 2.53, 2.33

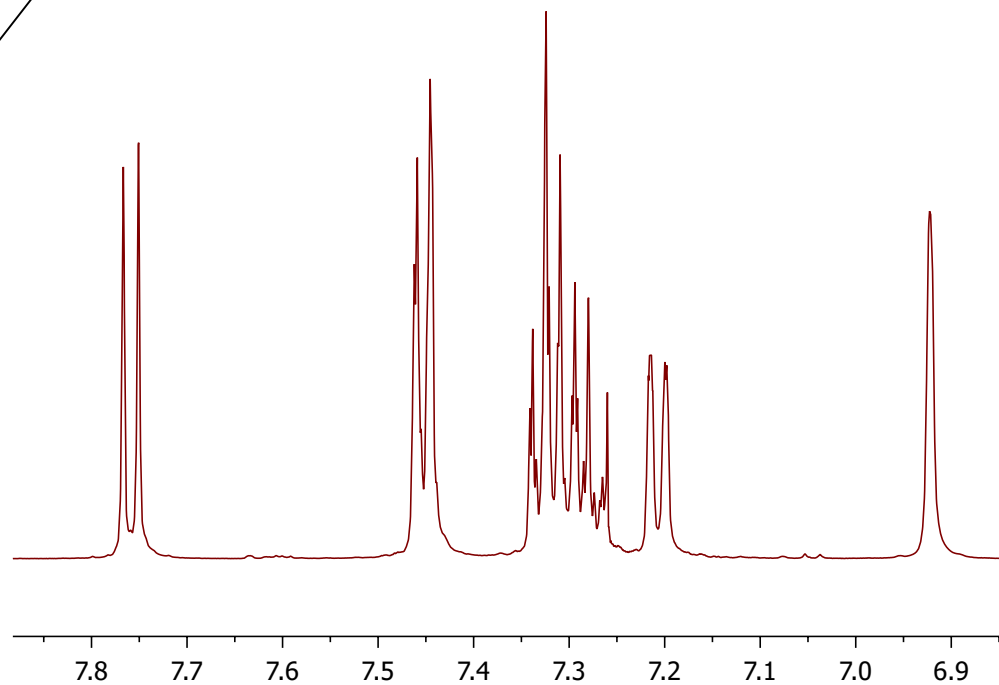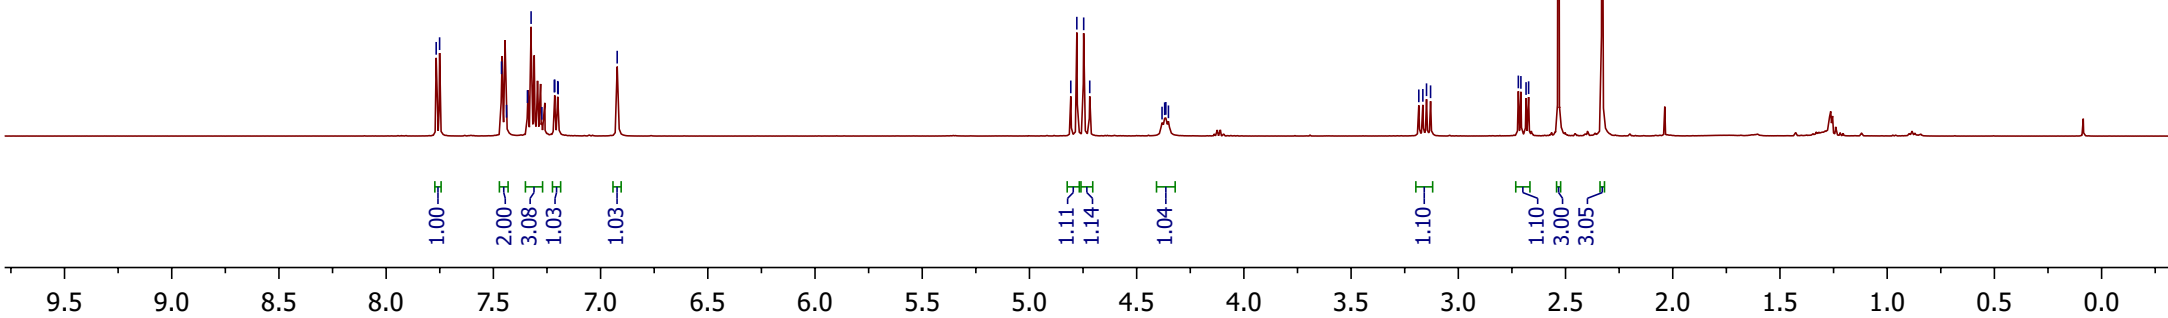

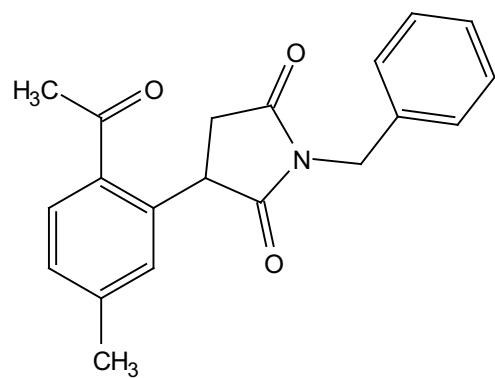

3pb

200.44  
177.81  
175.92  
143.58  
136.85  
136.06  
133.27  
132.32  
131.18  
128.83  
128.62  
128.45  
127.71

45.93  
42.43  
37.62  
28.51  
21.30

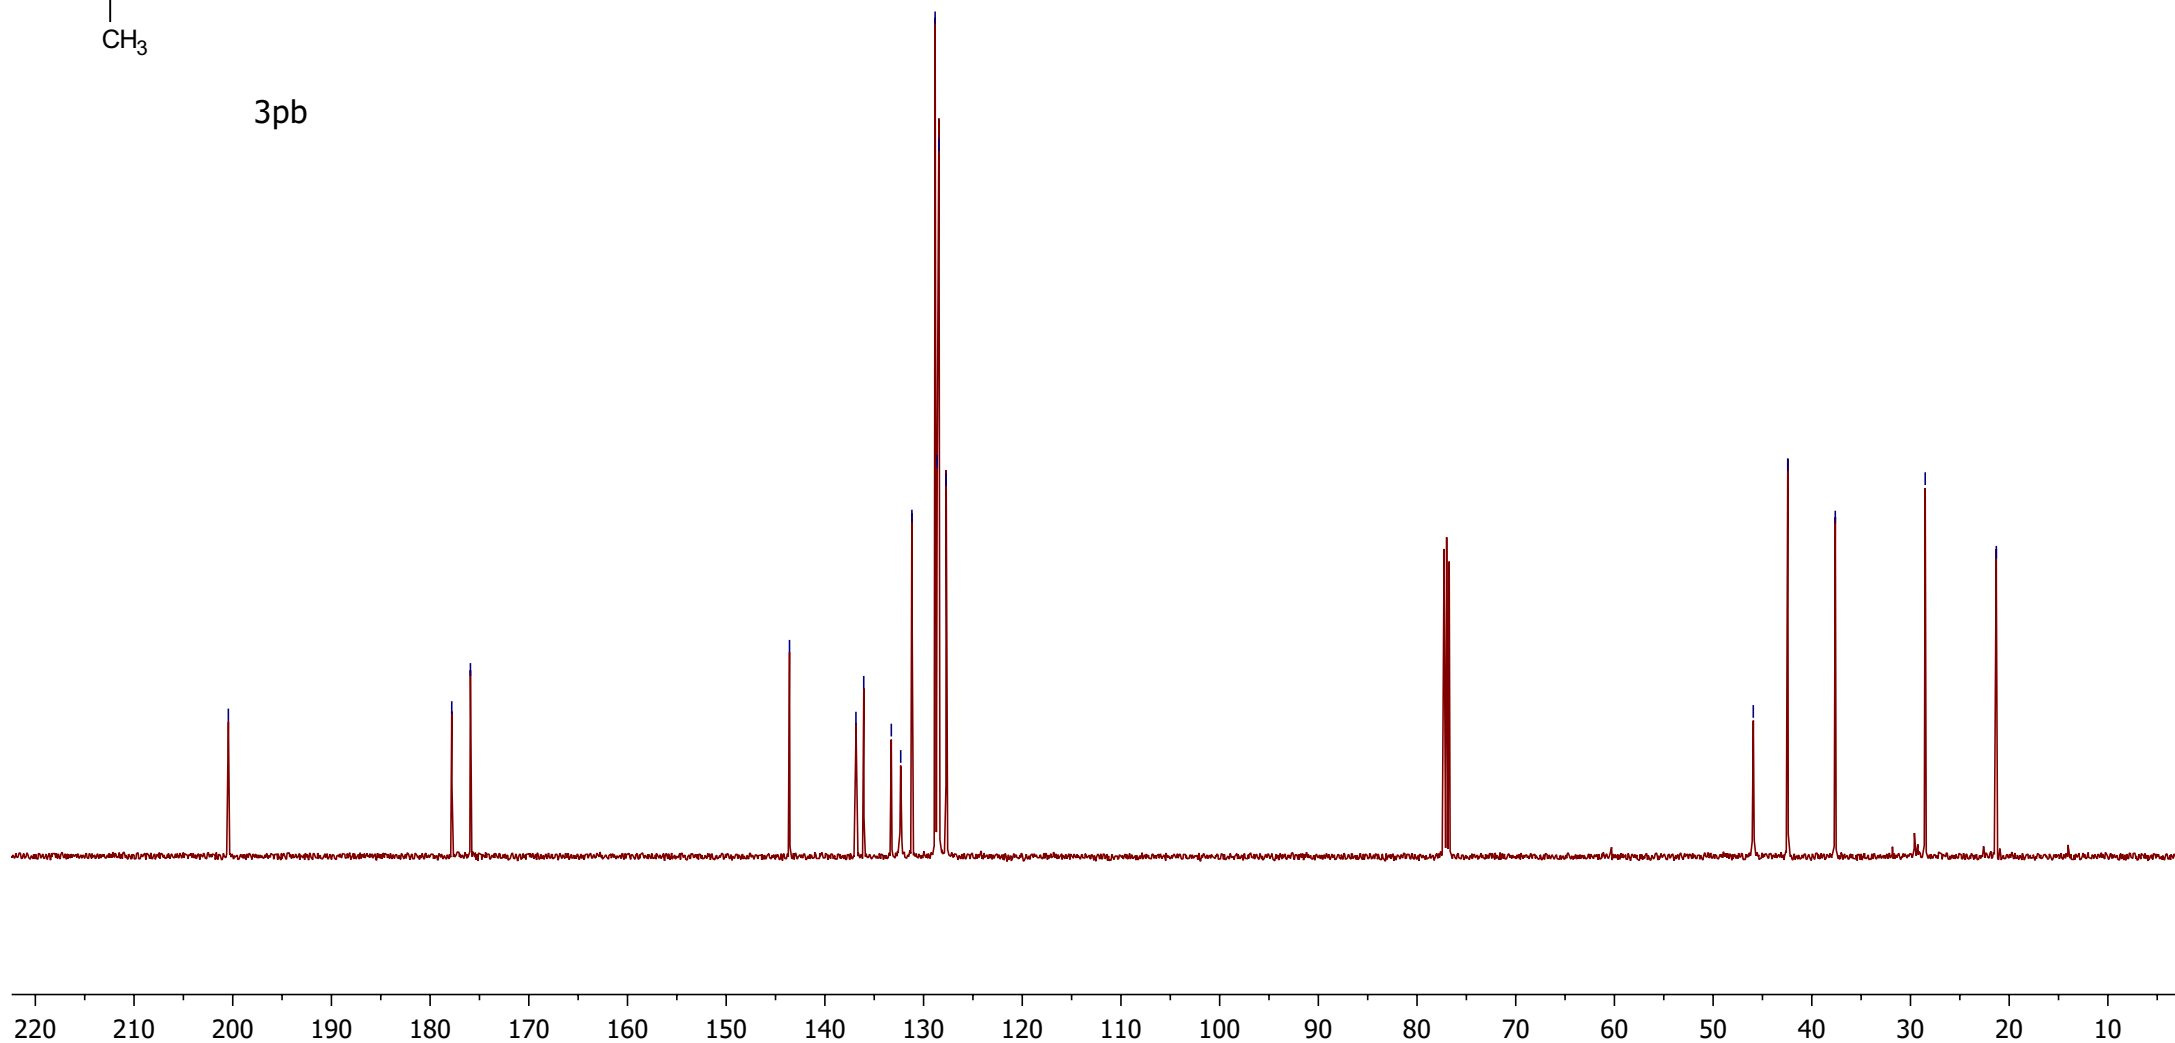

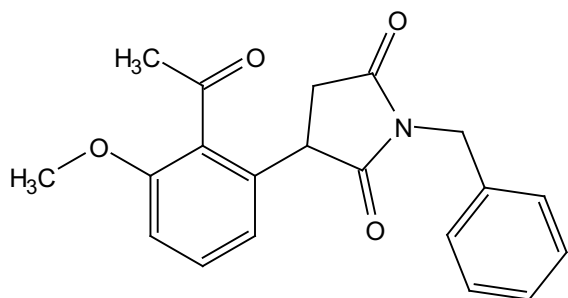

3qb

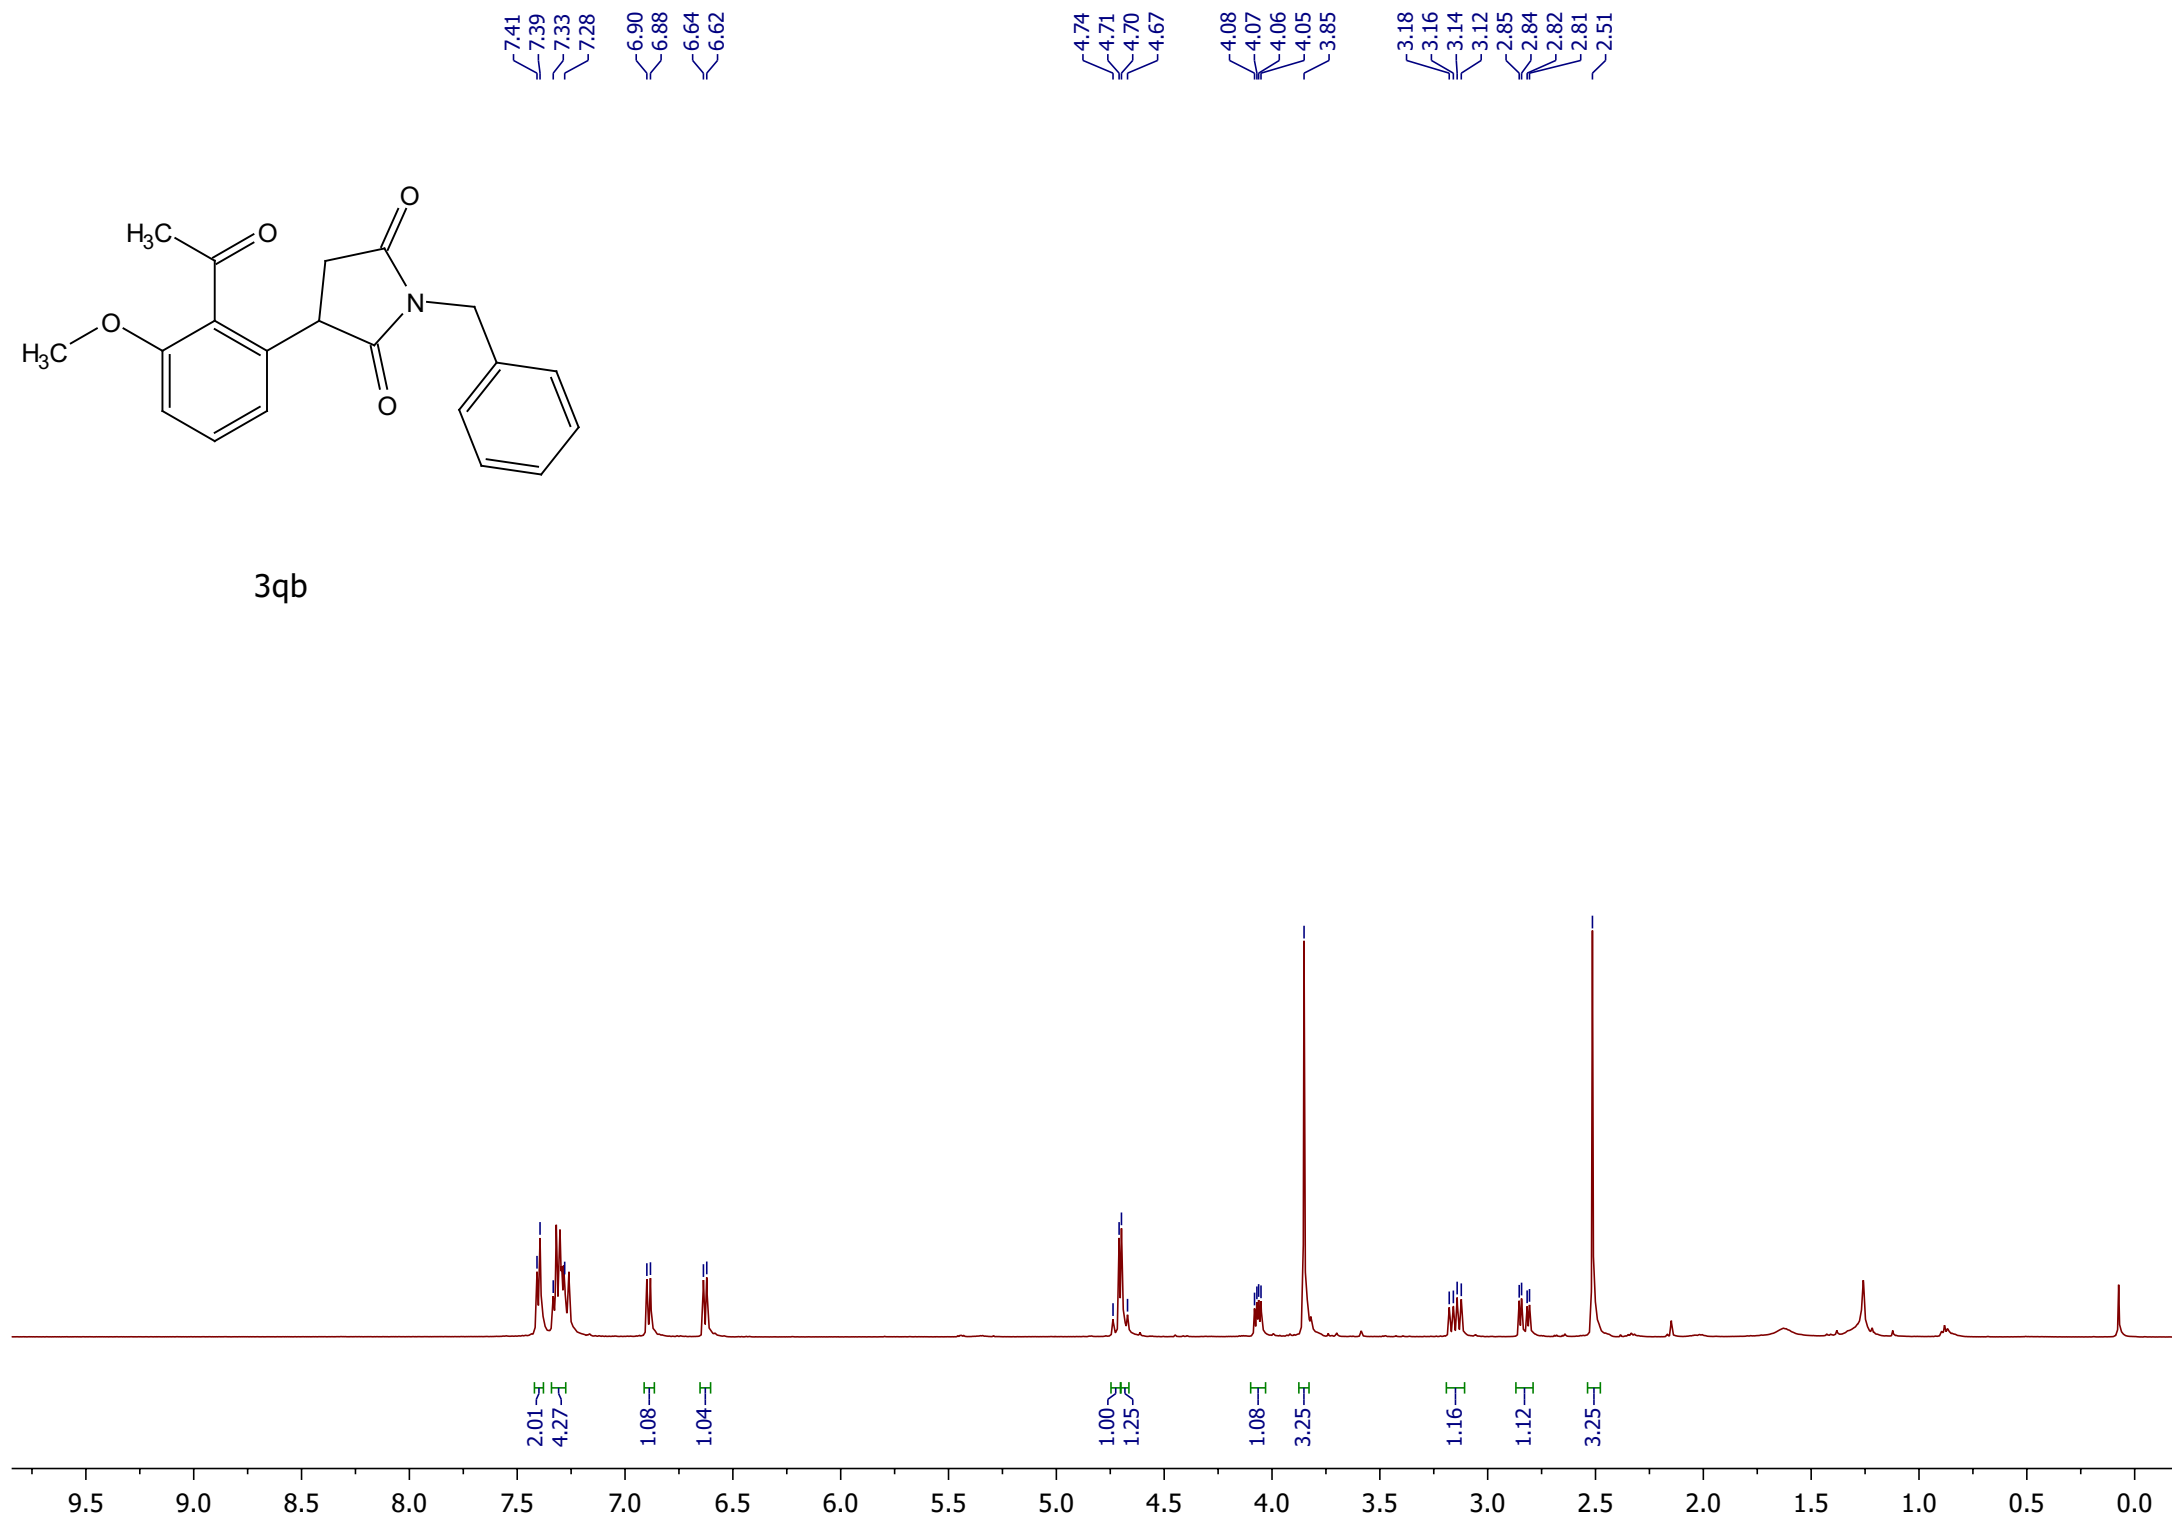



3qb

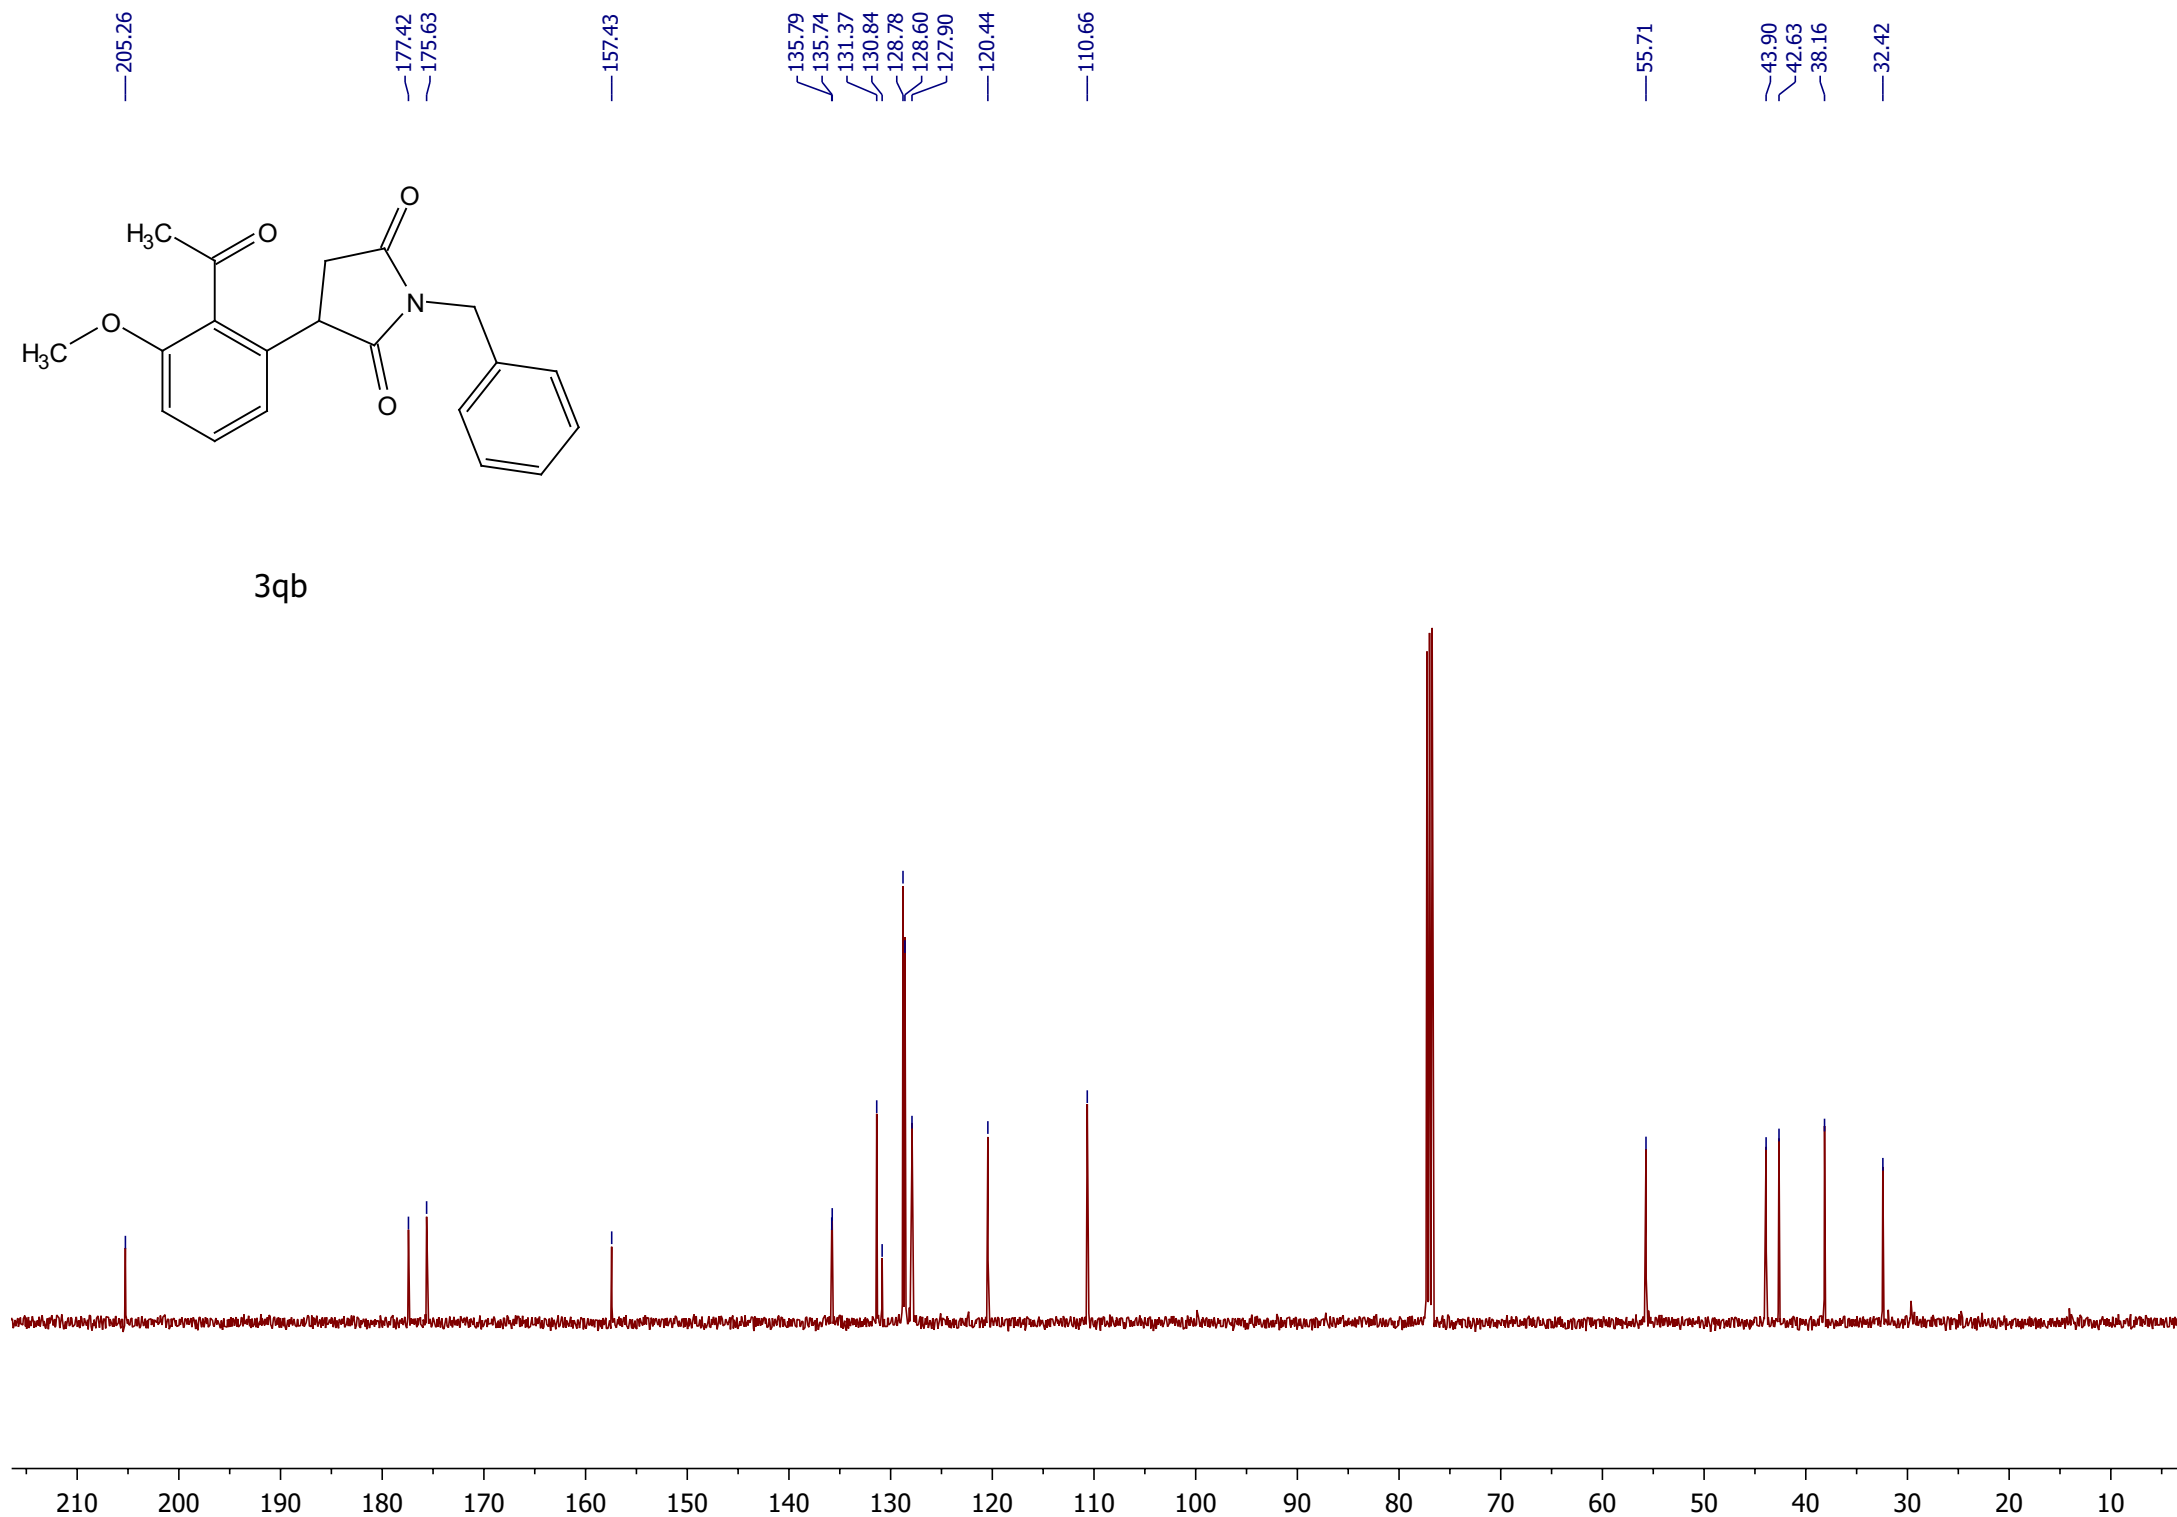

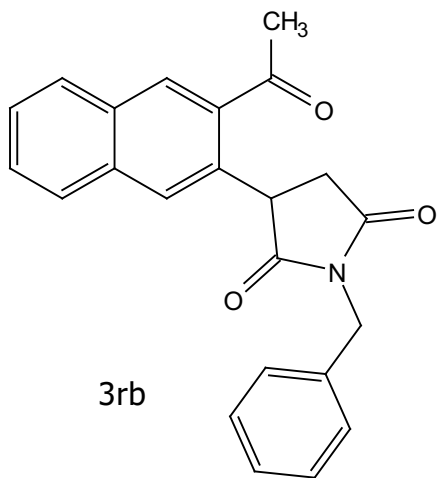

3rb

8.40  
7.93  
7.91  
7.75  
7.73  
7.63  
7.59  
7.54  
7.50  
7.48  
7.37  
7.29

4.85  
4.82  
4.79  
4.76  
4.54  
4.52  
4.52  
4.50

3.24  
3.22  
3.20  
3.17  
2.87  
2.85  
2.82  
2.81  
2.69

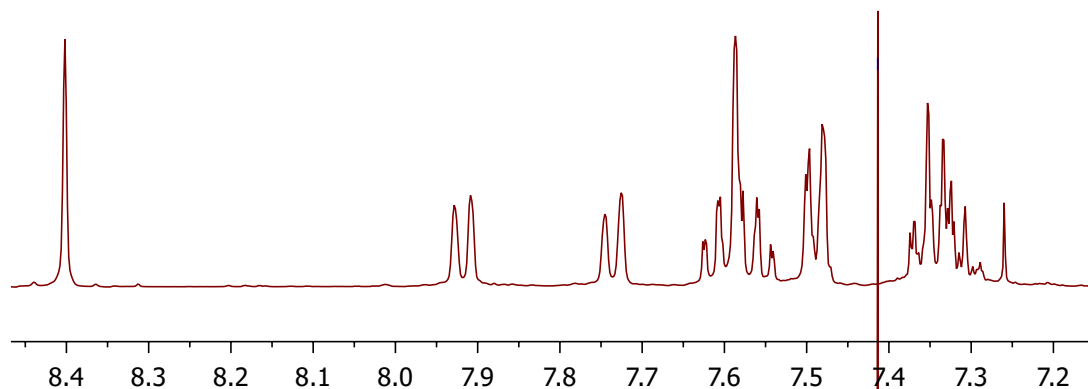

1.00  
1.04  
1.01  
3.14  
1.93  
3.13

1.09  
1.05  
1.05

1.09  
1.09  
3.02

9.5 9.0 8.5 8.0 7.5 7.0 6.5 6.0 5.5 5.0 4.5 4.0 3.5 3.0 2.5 2.0 1.5 1.0 0.5 0.0

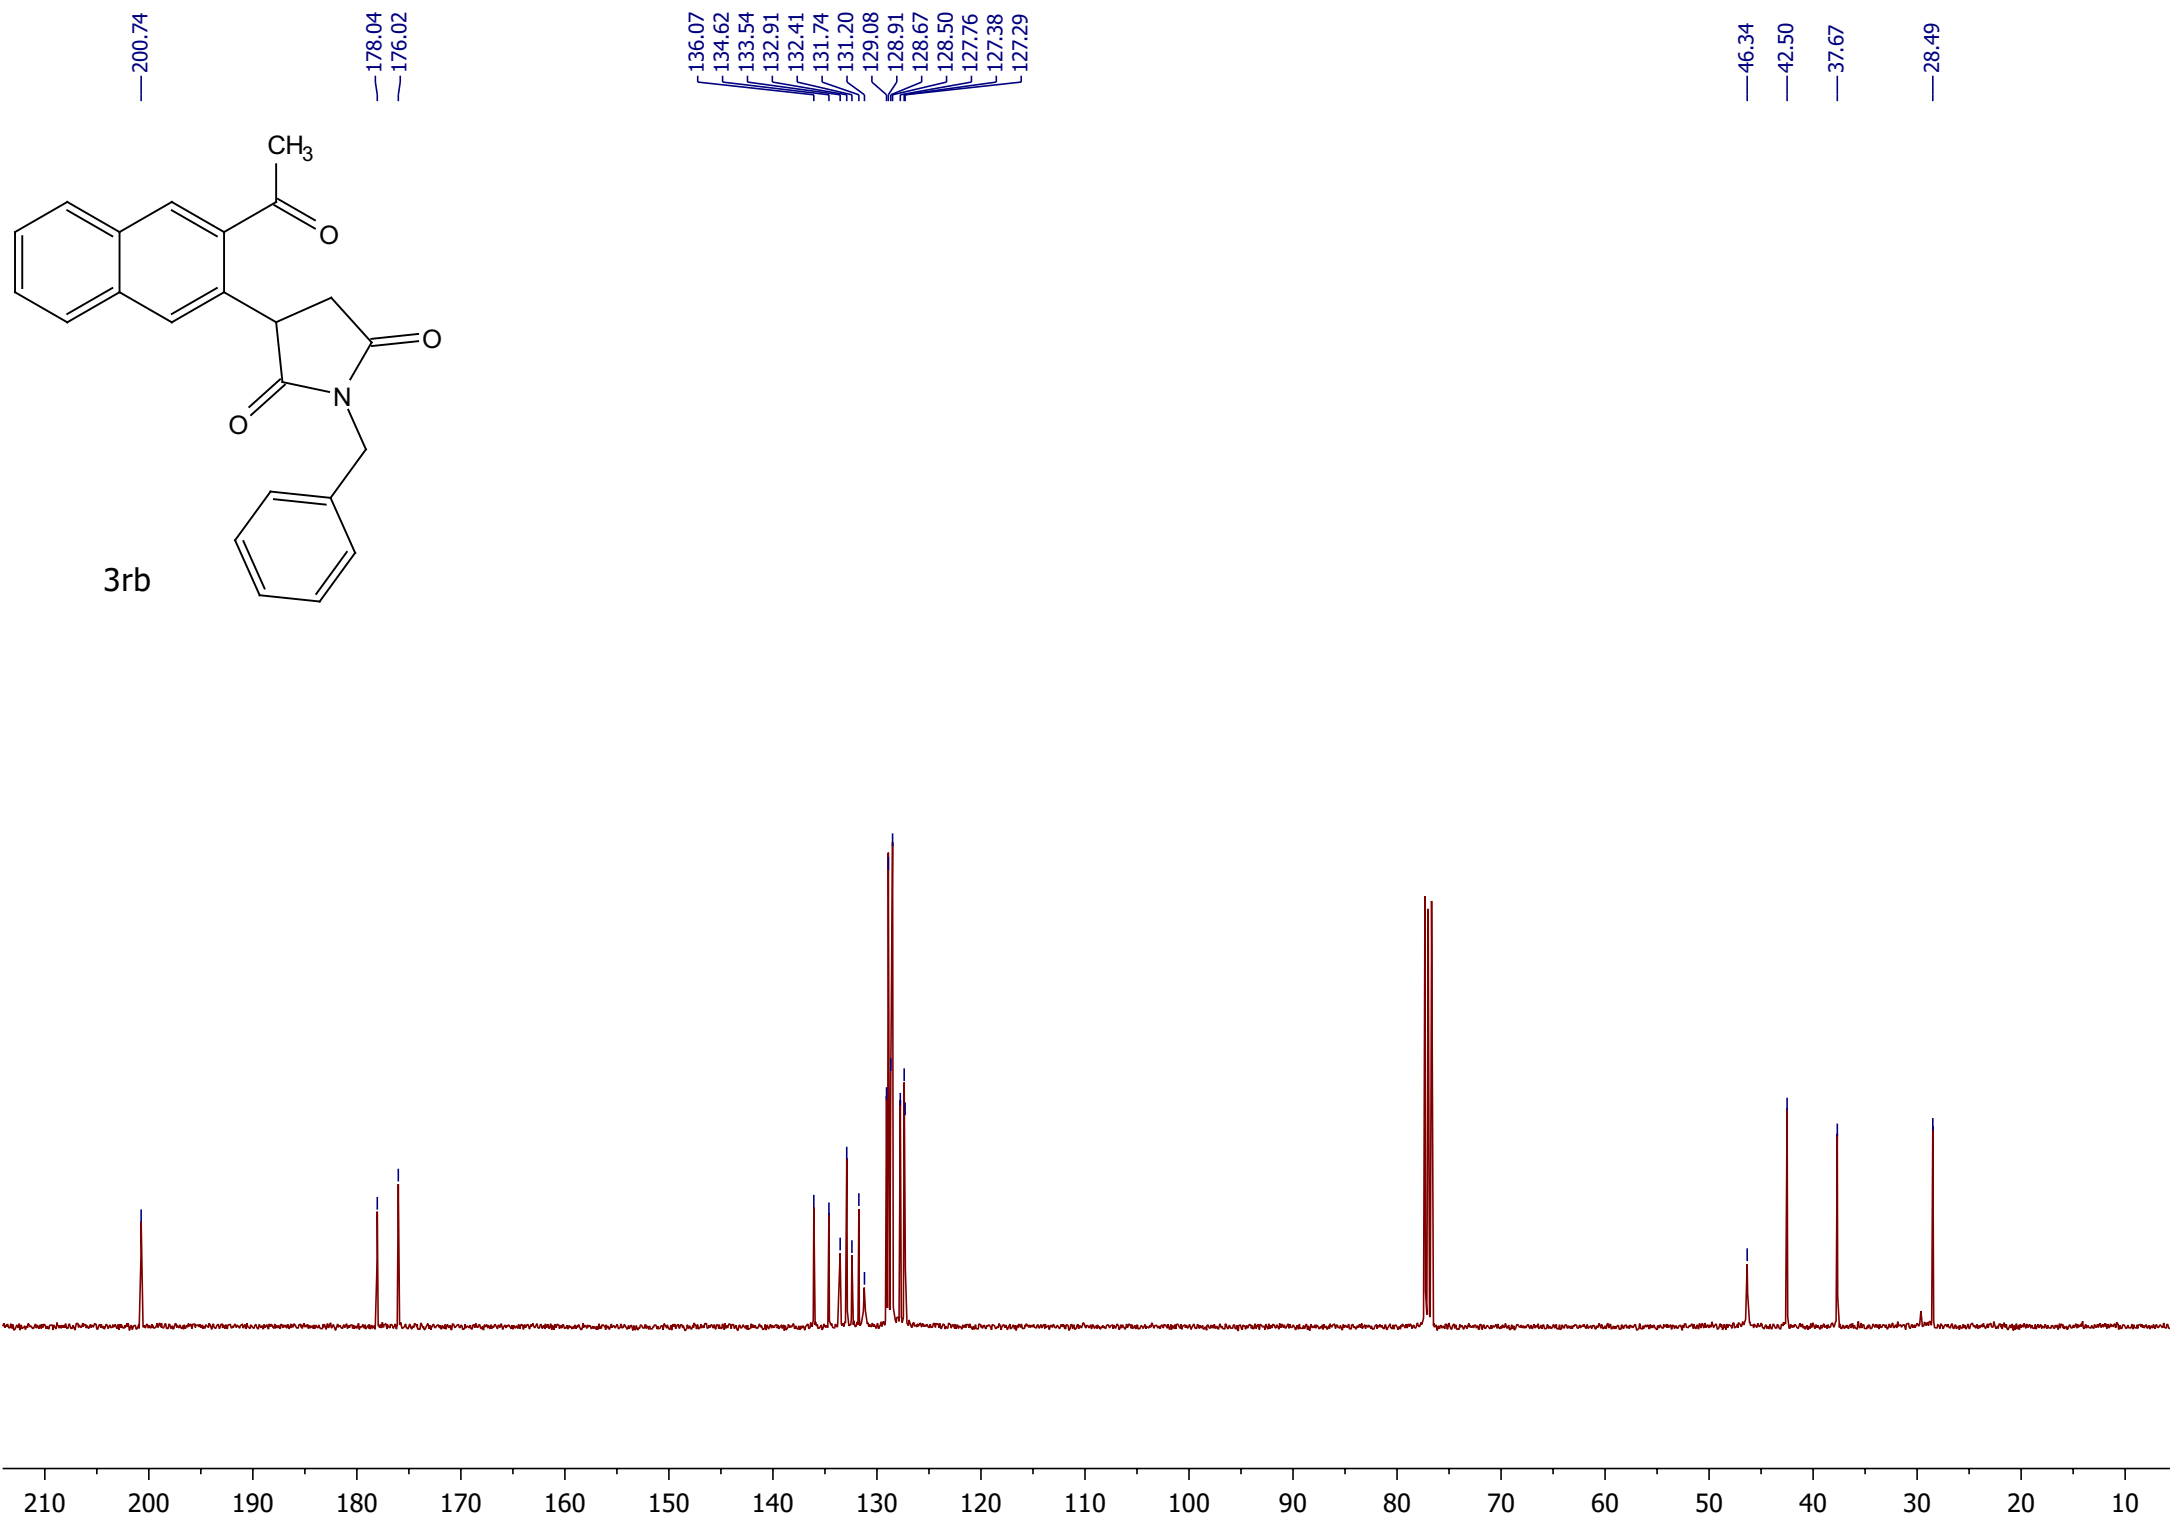

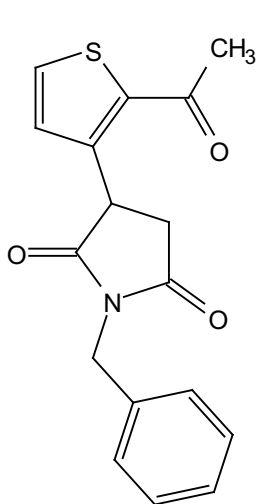

3sb

7.49 7.48 7.44 7.41 7.34 7.30 7.27 6.93 6.92 4.81 4.77 4.73 4.70 4.69 4.68 4.67 4.65 3.22 3.19 3.17 3.15 2.65 2.63 2.60 2.59 2.52

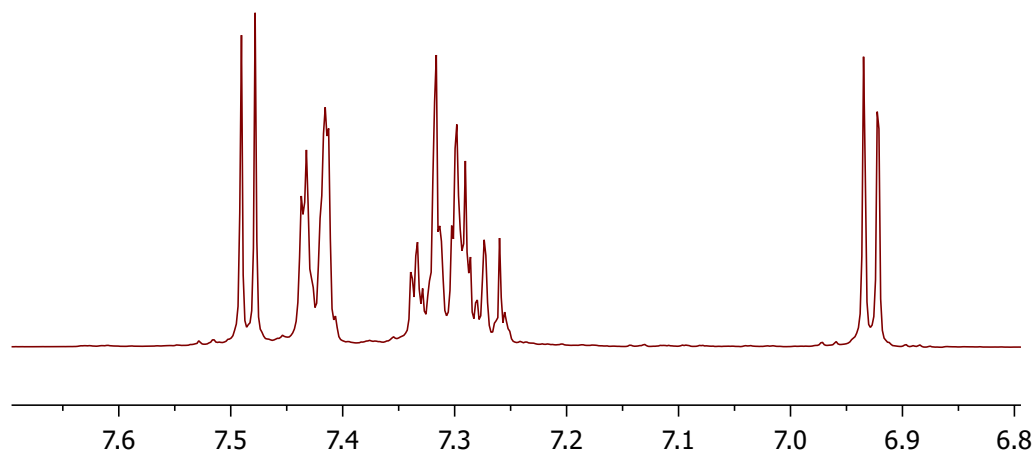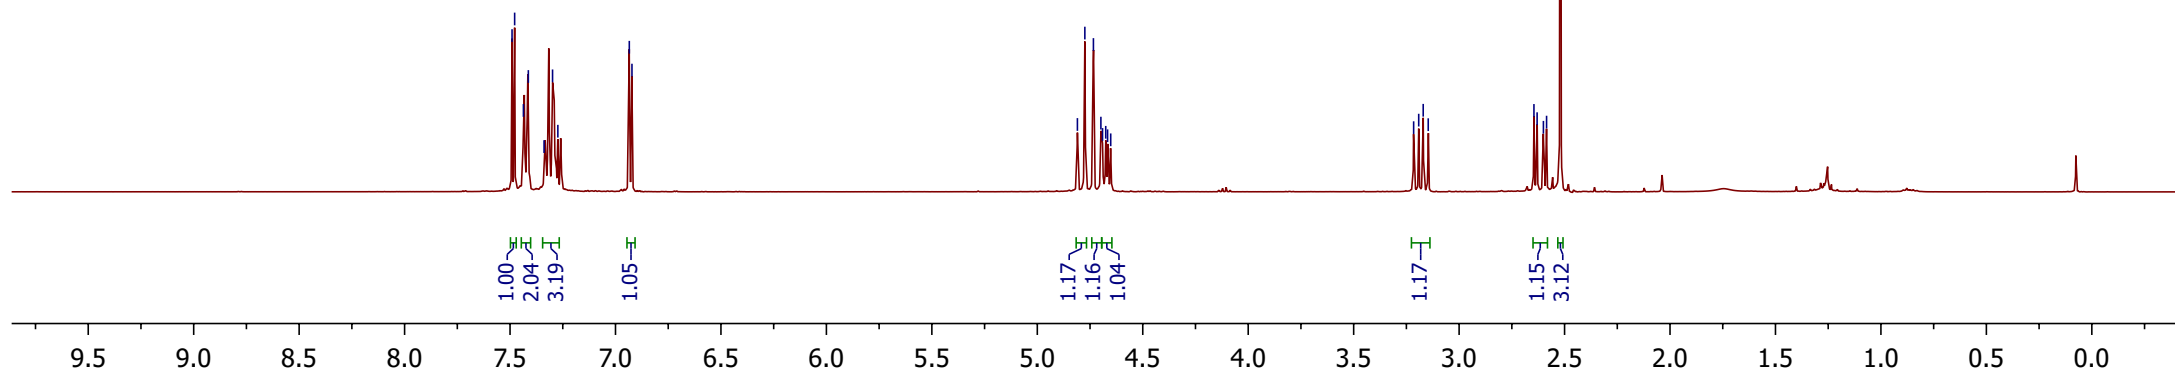

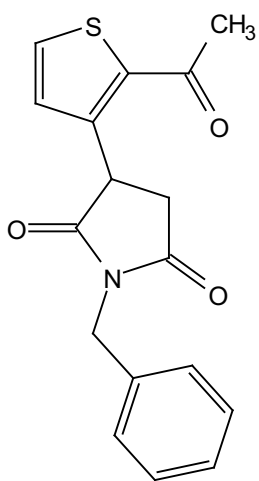

3sb

190.70  
176.70  
175.58  
142.42  
136.25  
135.85  
130.81  
130.66  
128.76  
128.52  
127.79

42.53  
41.53  
36.43  
29.15

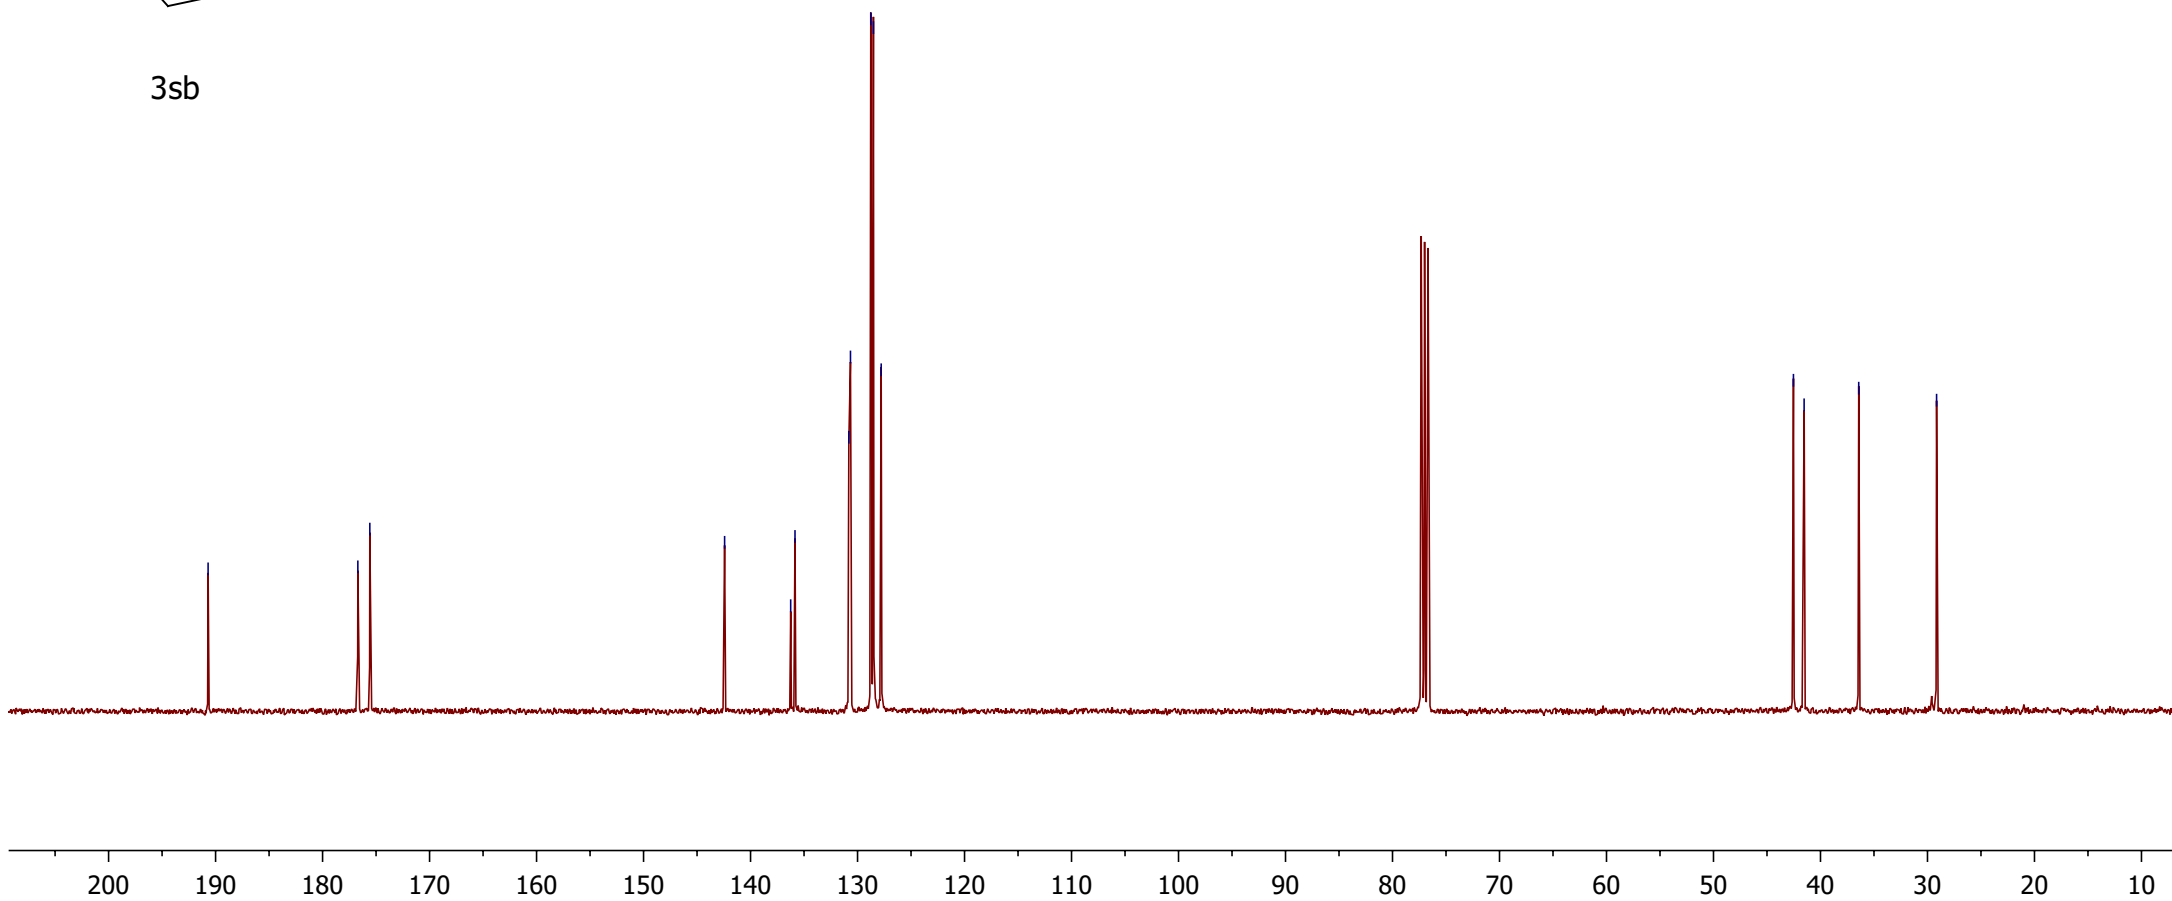

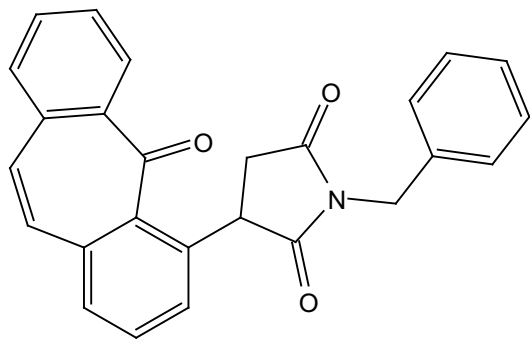

3tb

7.58  
7.50  
7.48  
7.43  
7.40  
7.30  
7.24  
7.19  
7.05  
7.01  
6.98

4.90  
4.86  
4.83  
4.79  
4.33  
4.31  
4.31  
4.29

3.35  
3.33  
3.31  
3.29  
3.06  
3.04  
3.01  
3.00

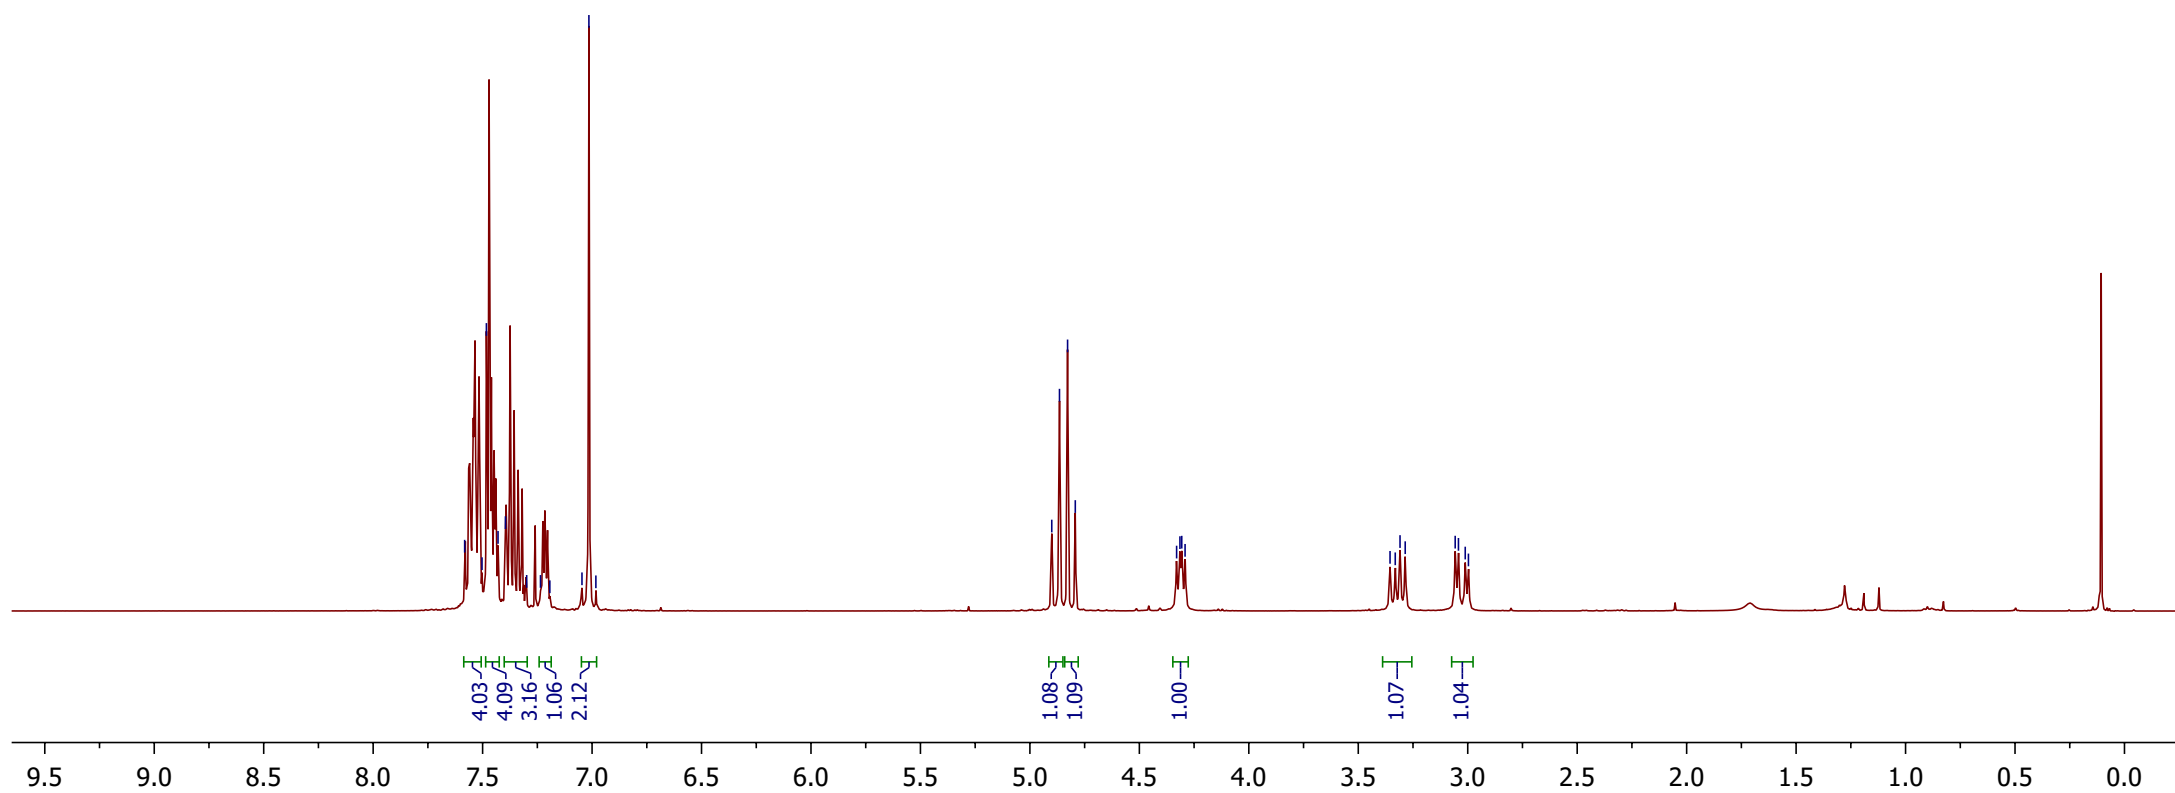

— 196.90

— 177.49  
— 175.84

140.36  
136.97  
136.73  
135.97  
135.25  
133.40  
131.38  
131.33  
130.82  
130.76  
130.20  
129.17  
128.88  
128.58  
127.88

46.06  
42.66  
38.78

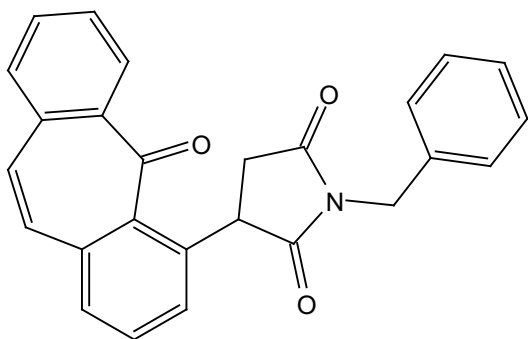

3tb

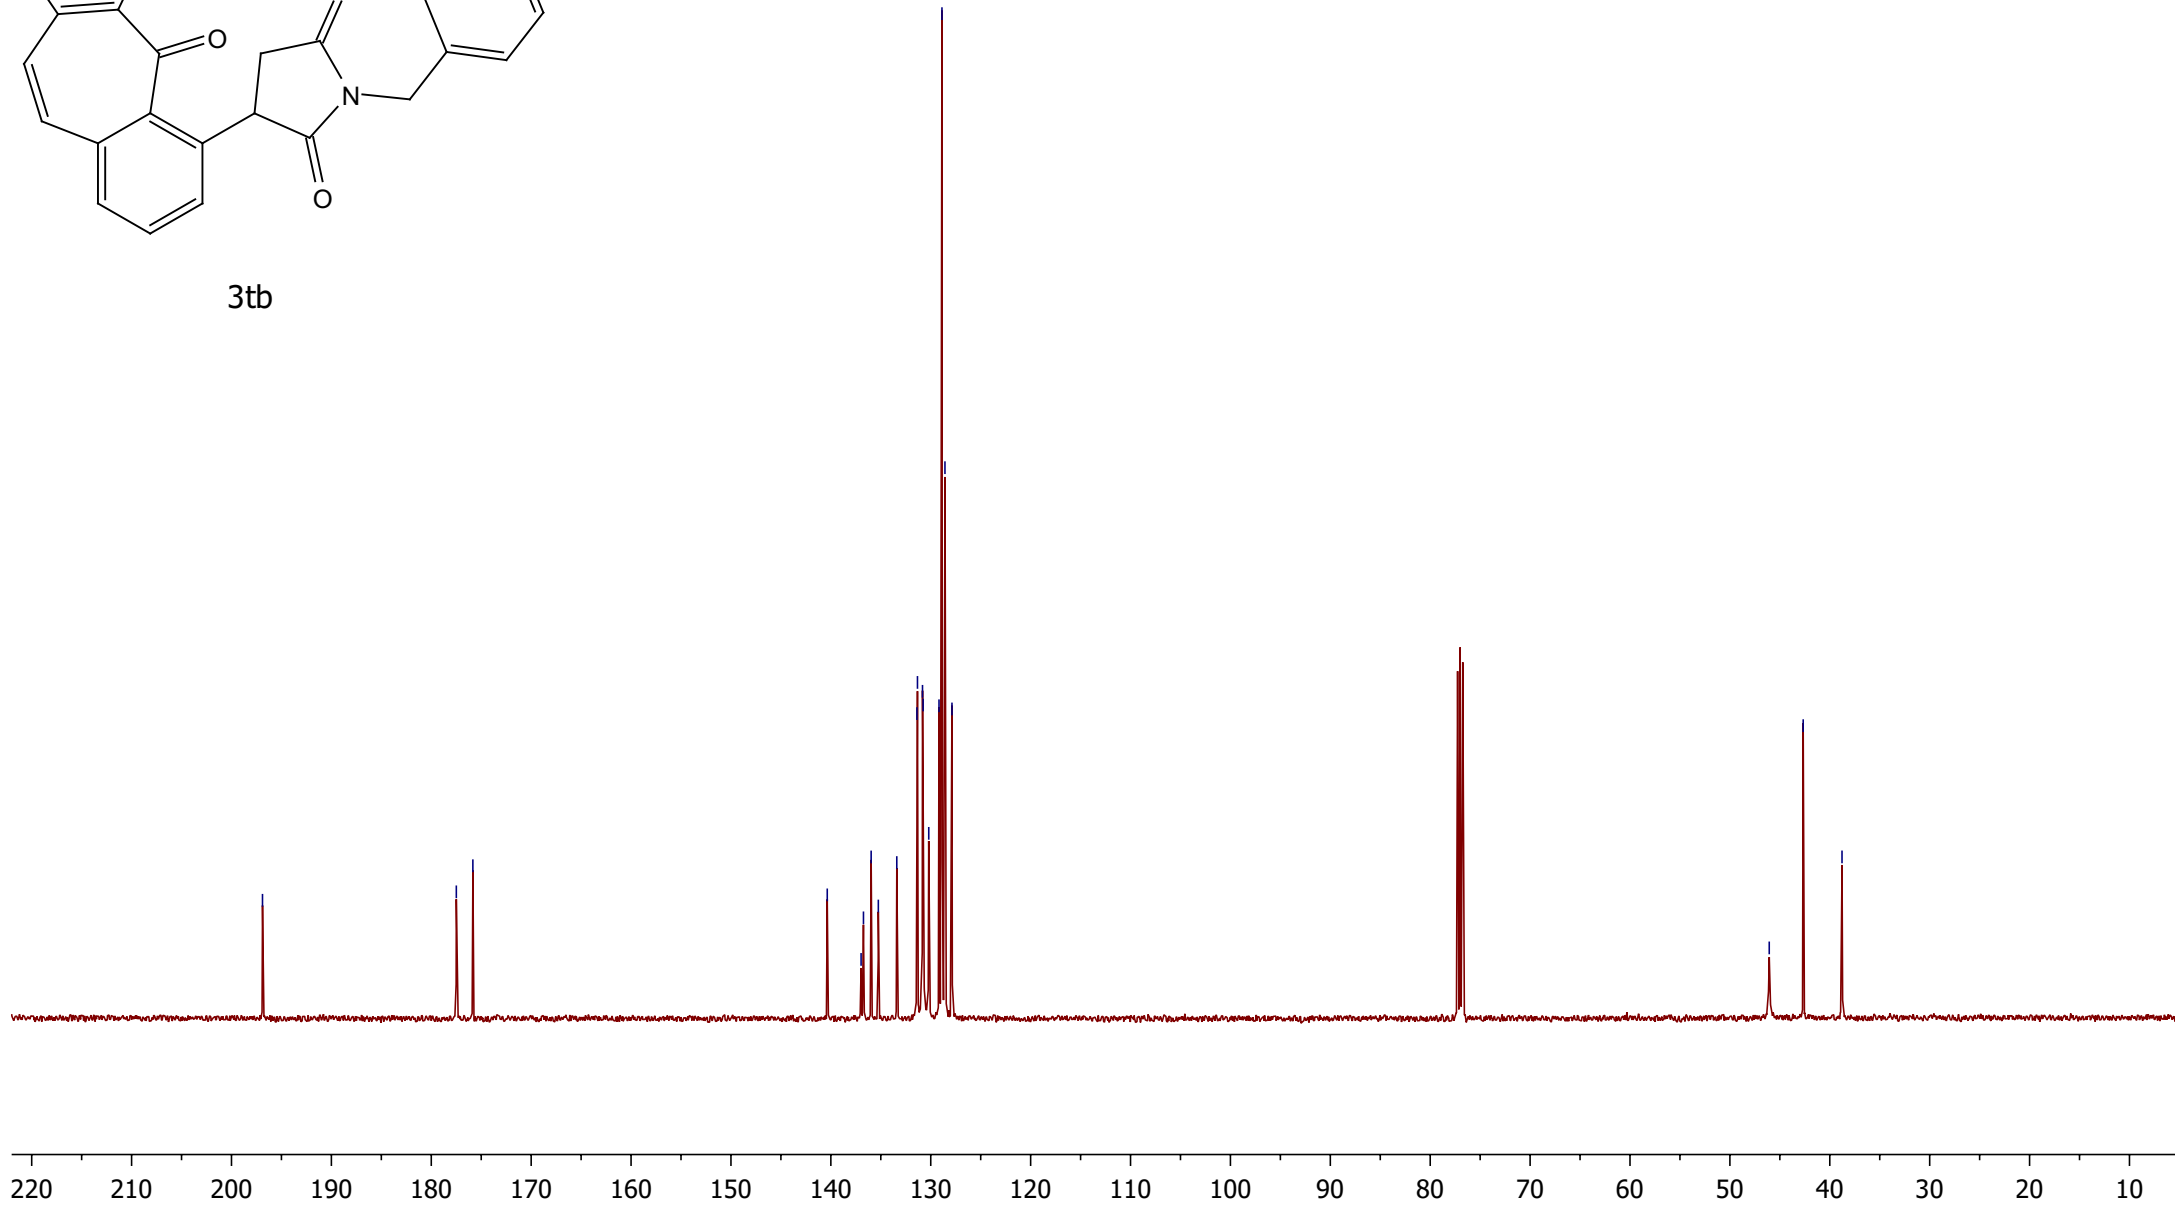

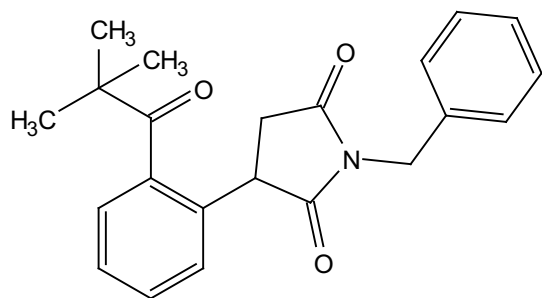

3ab

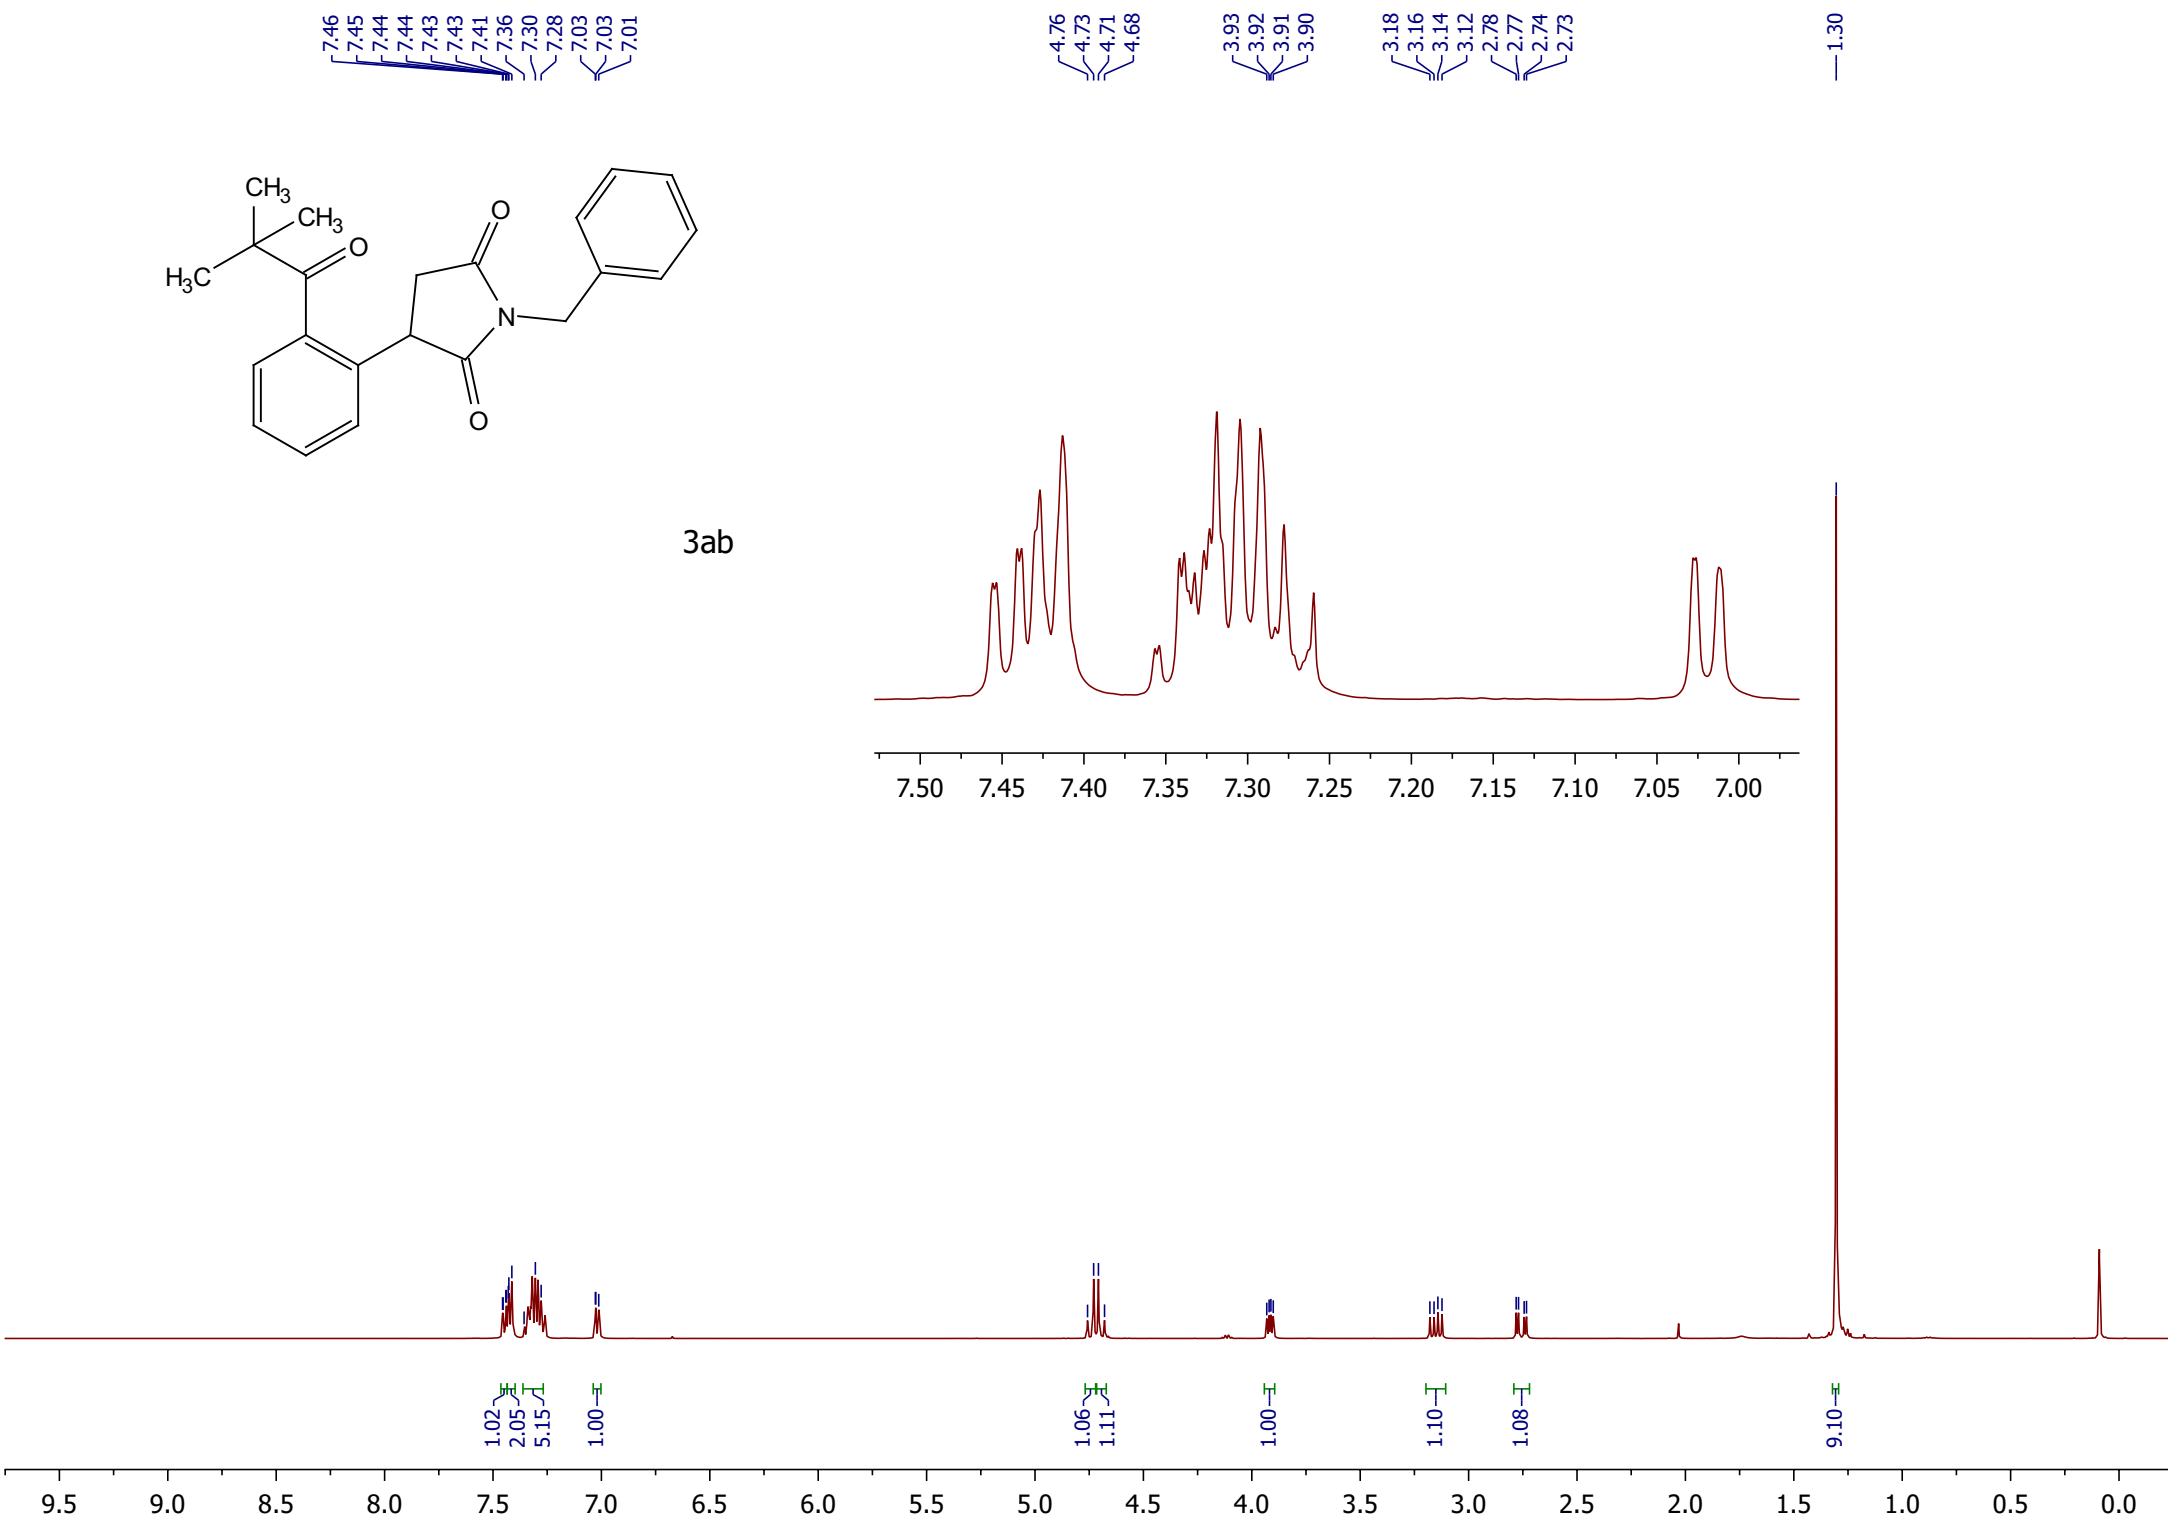

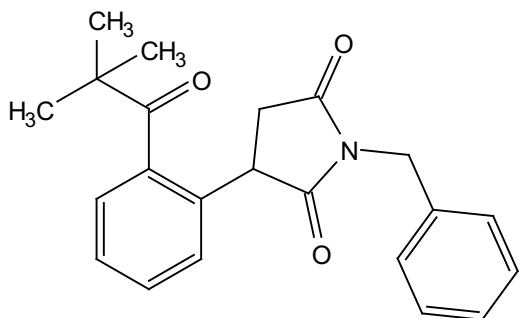

3ab

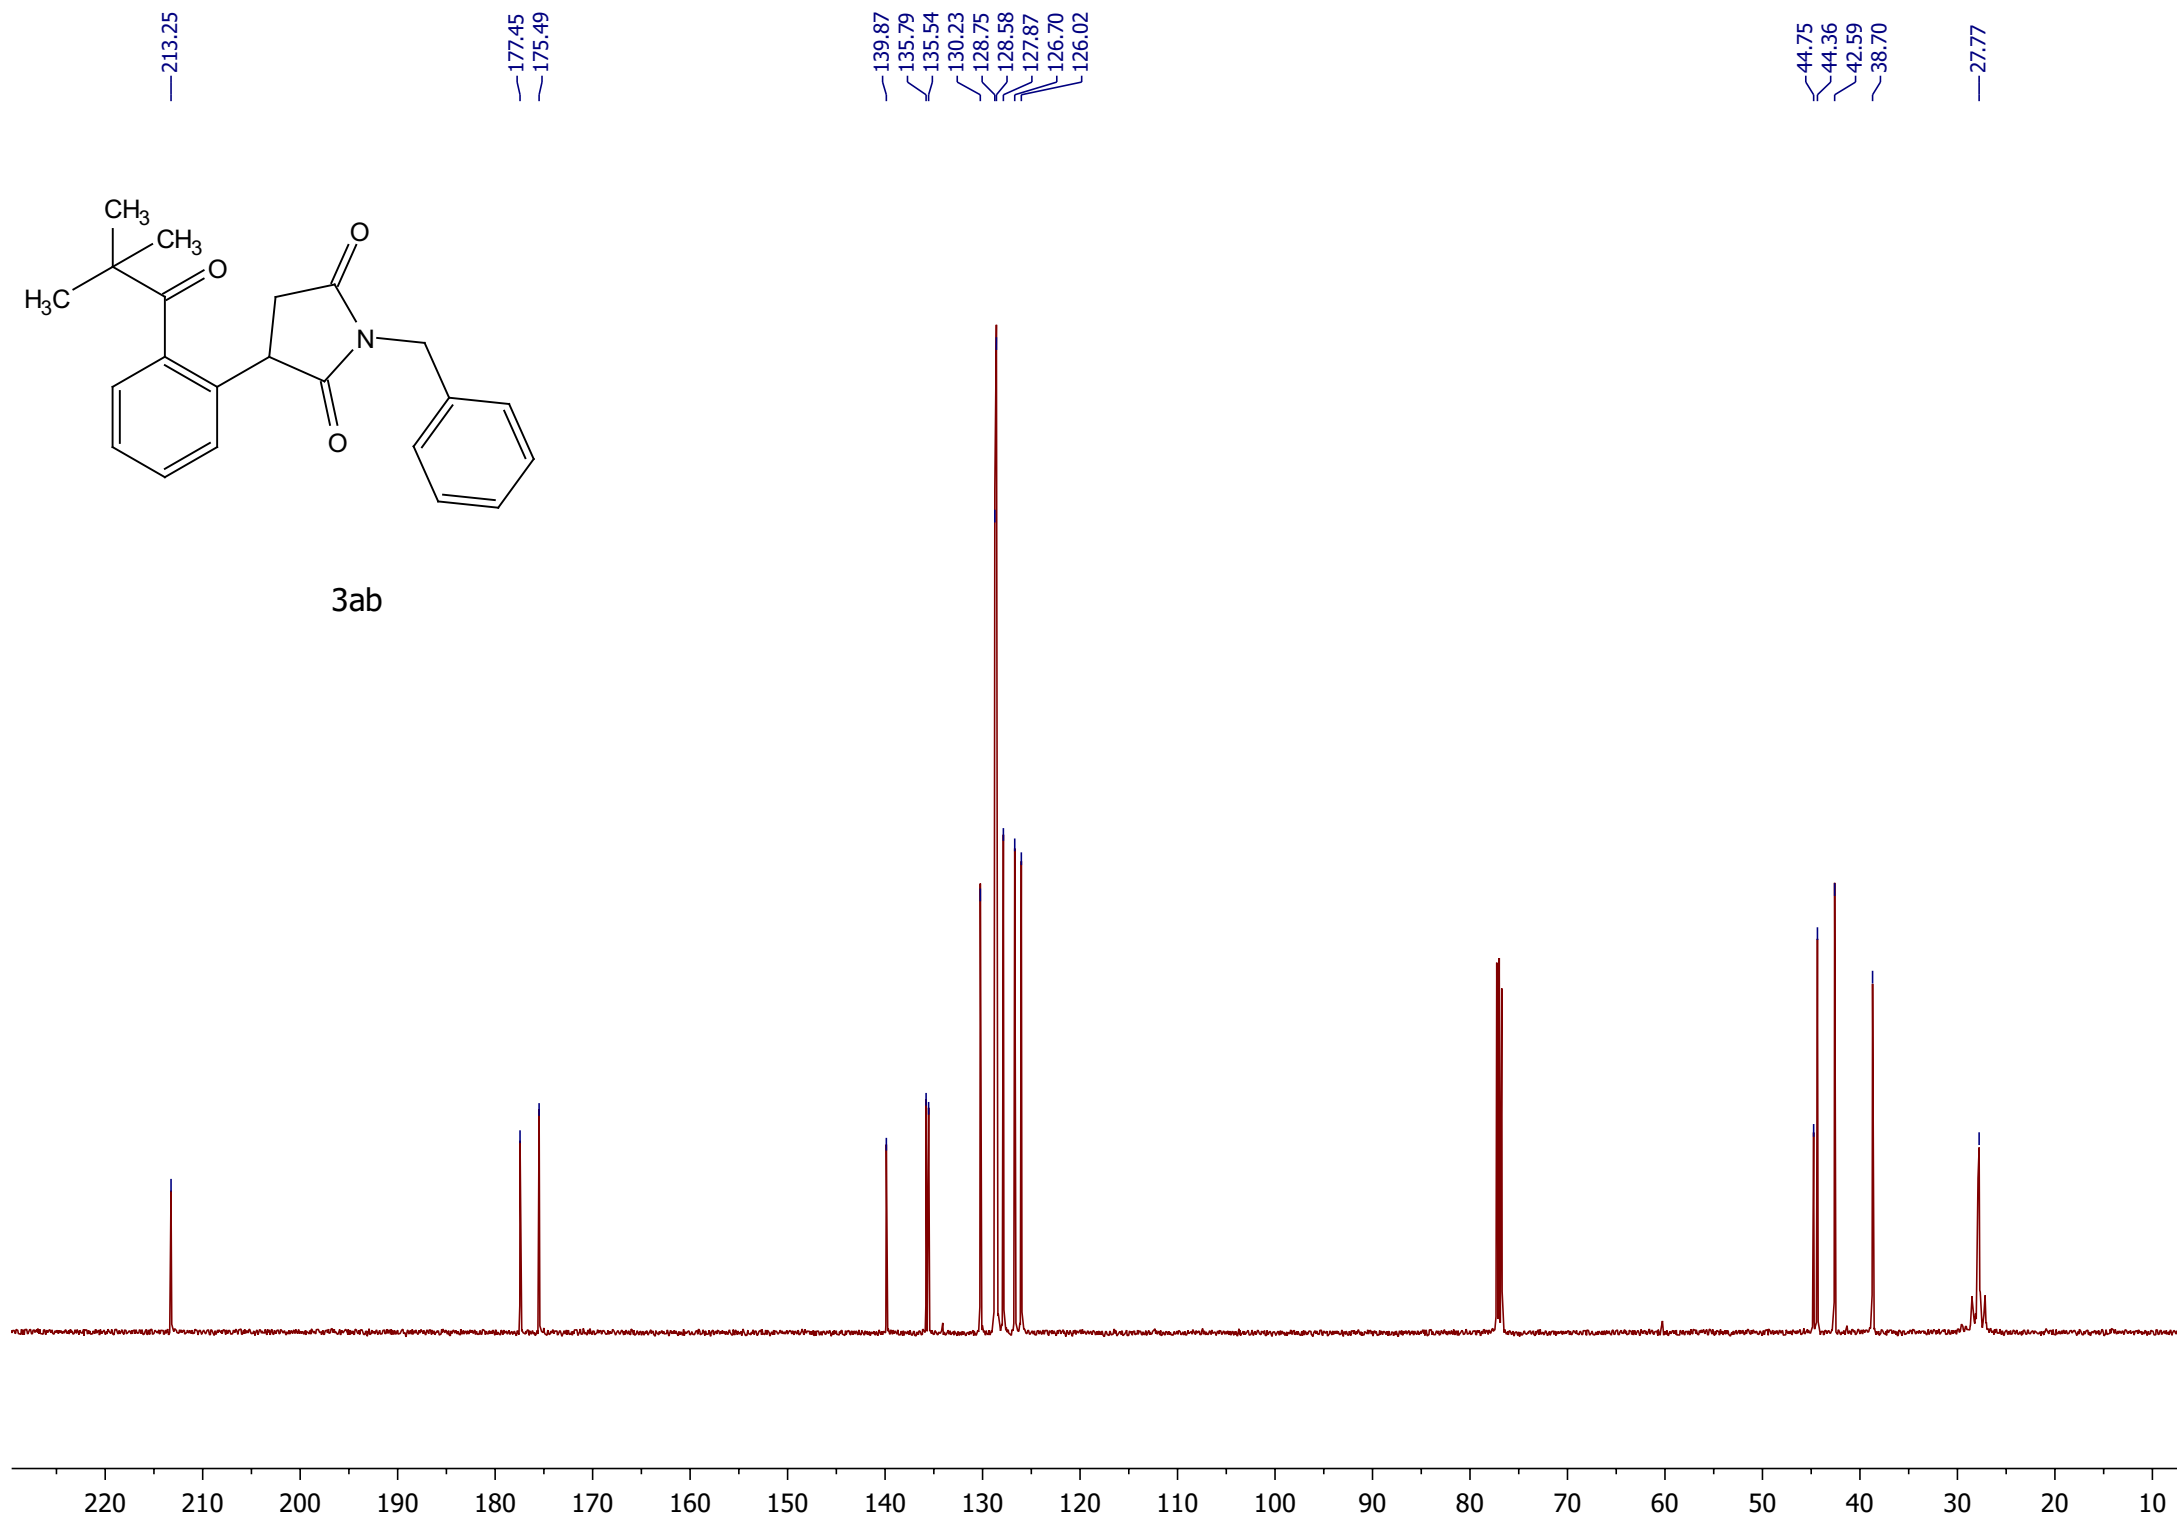

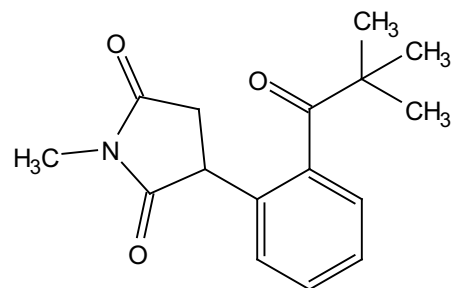

3ac

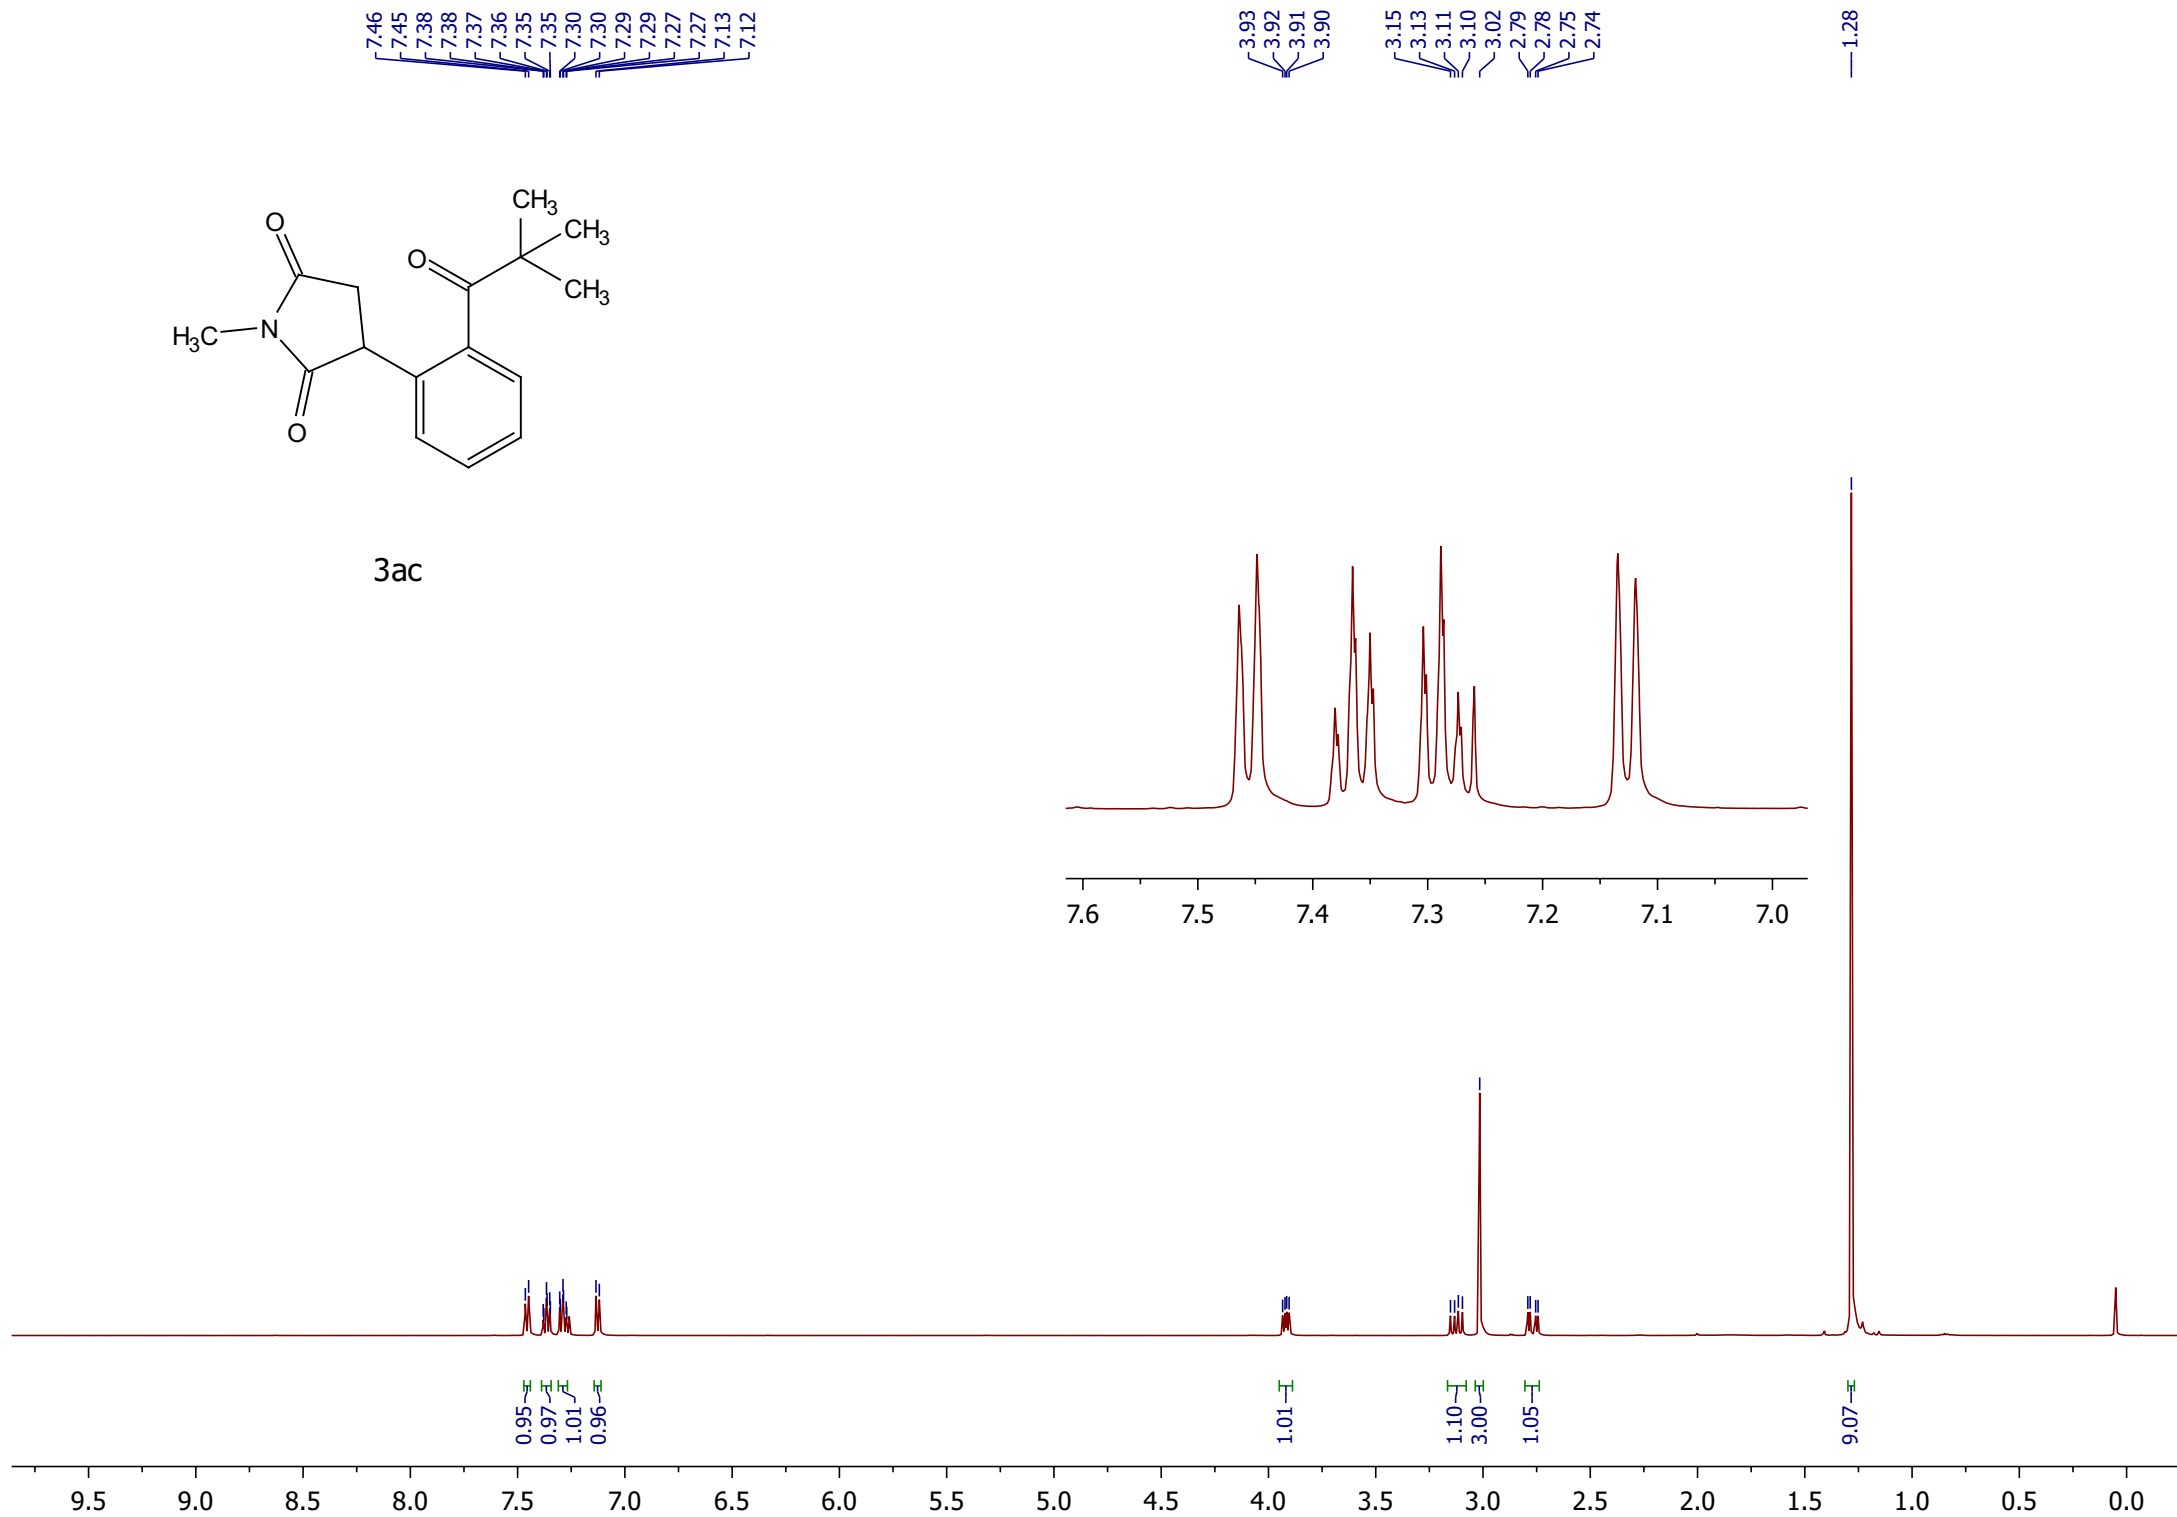

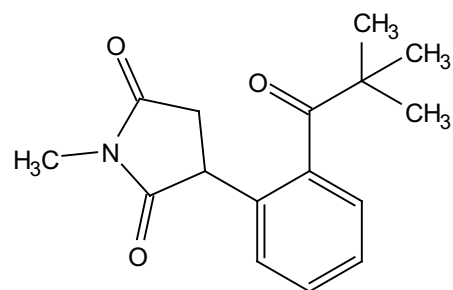

3ac

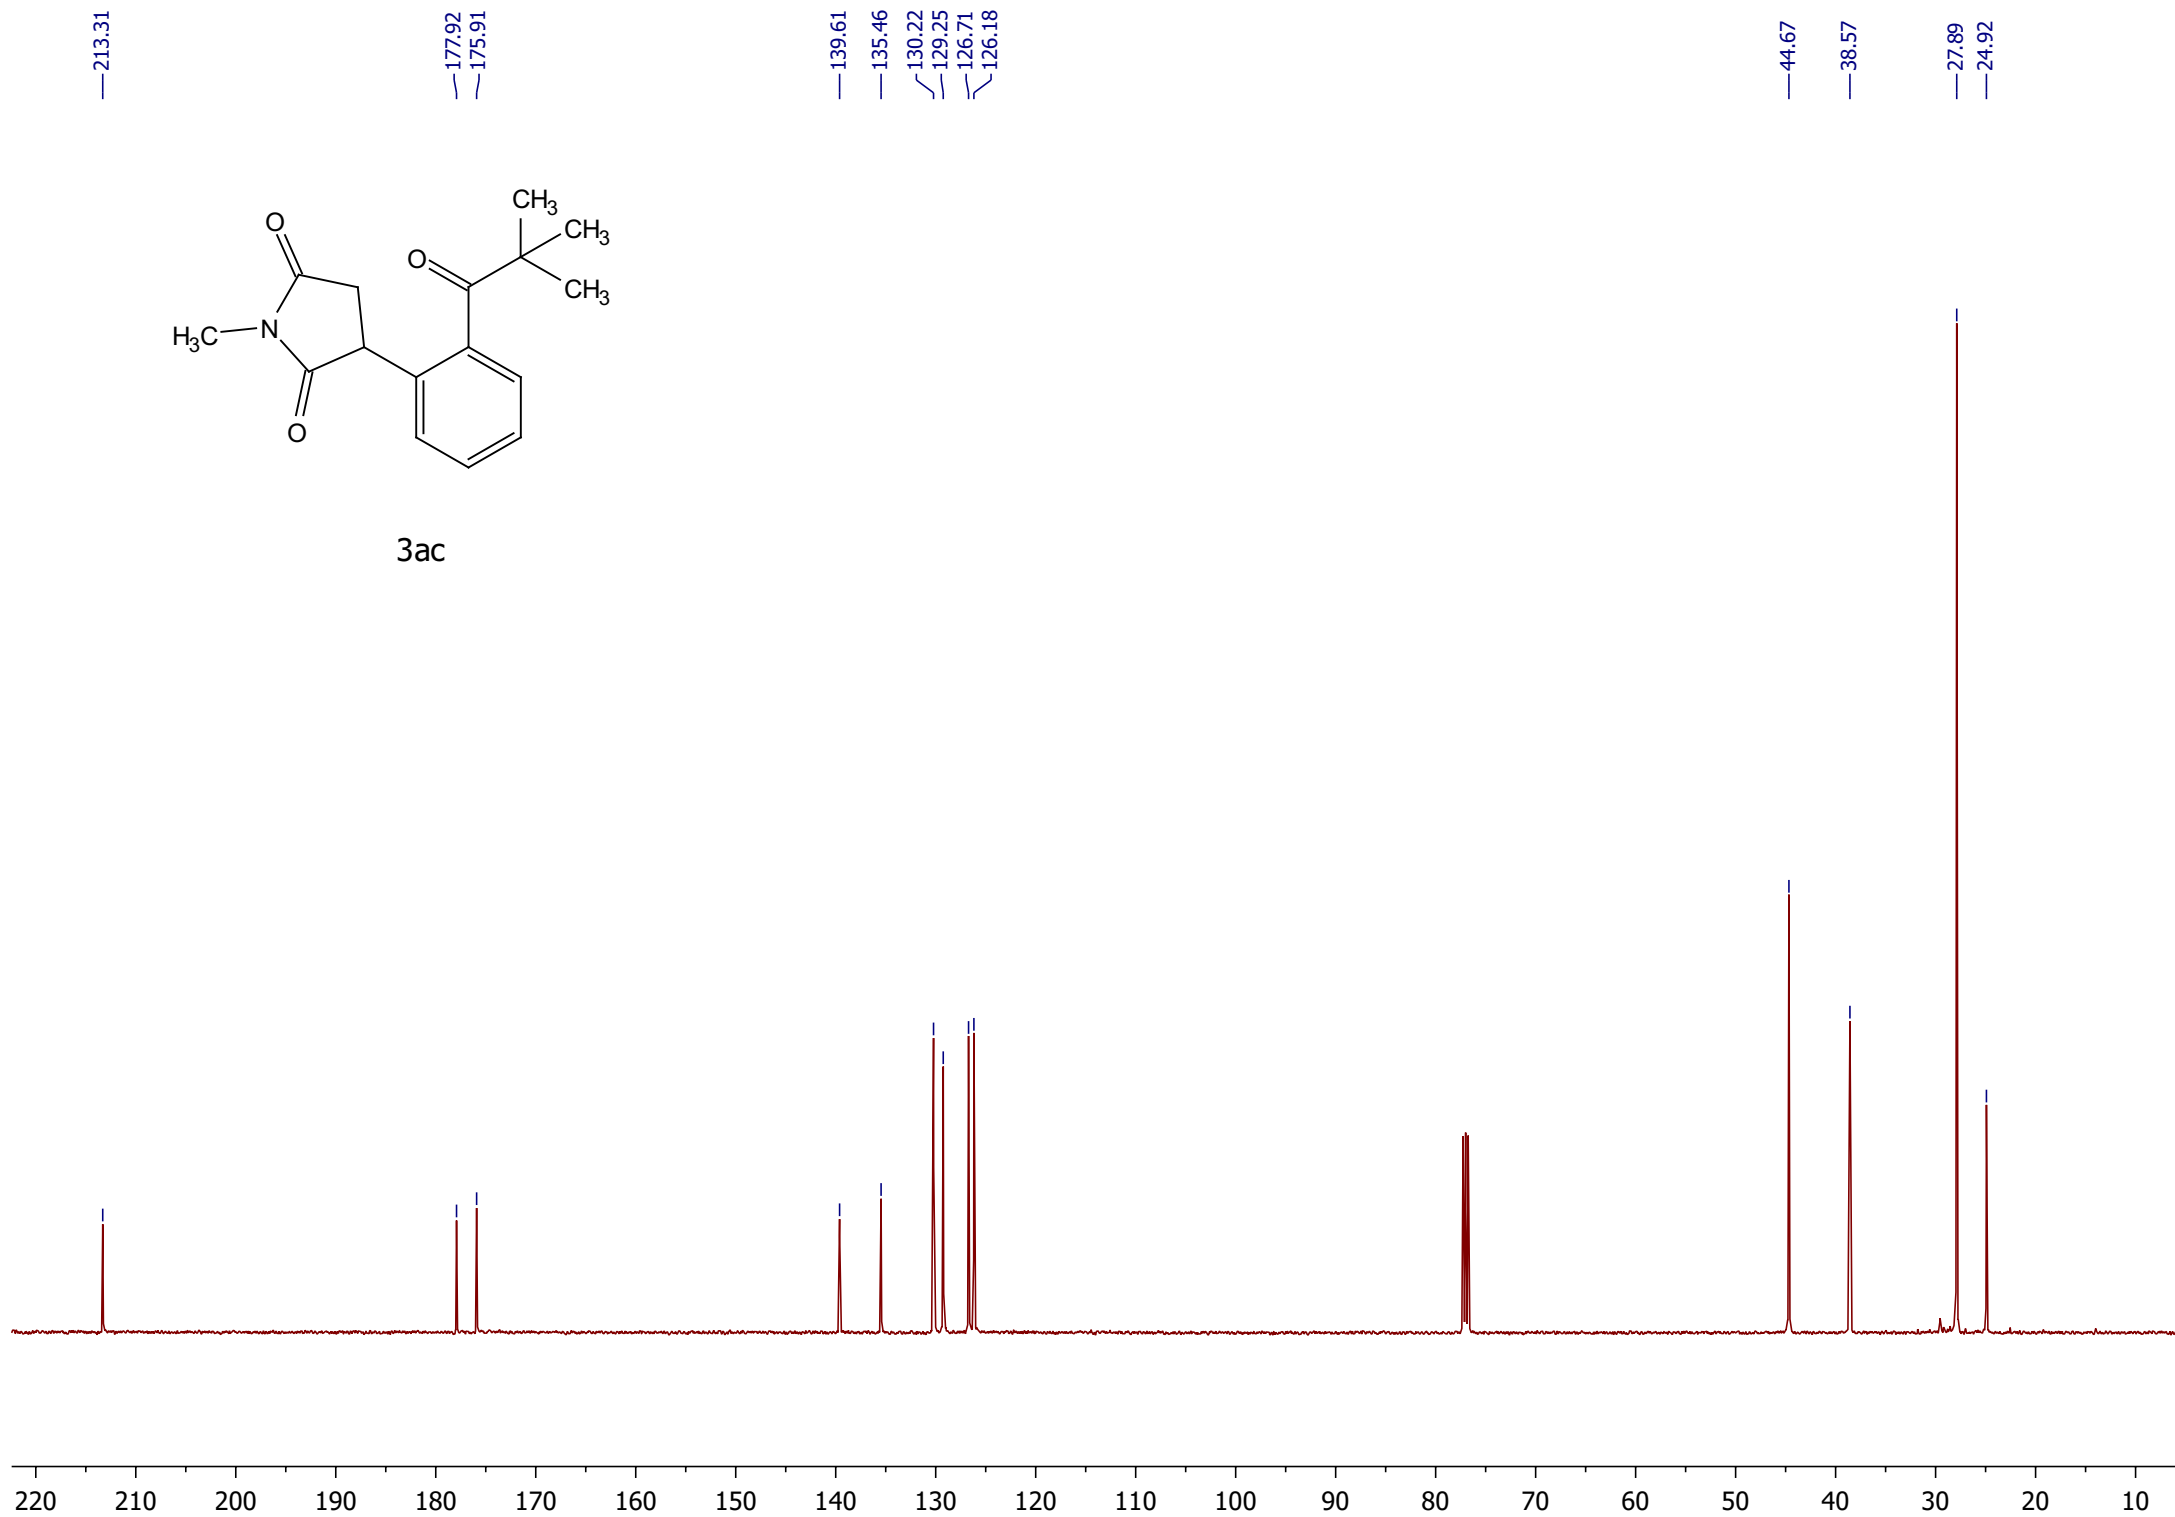

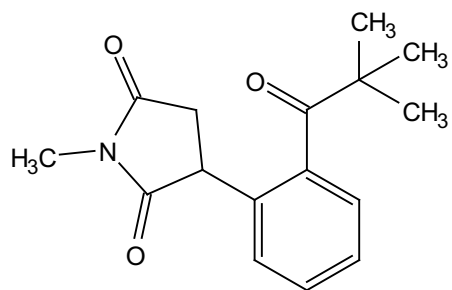

3ac

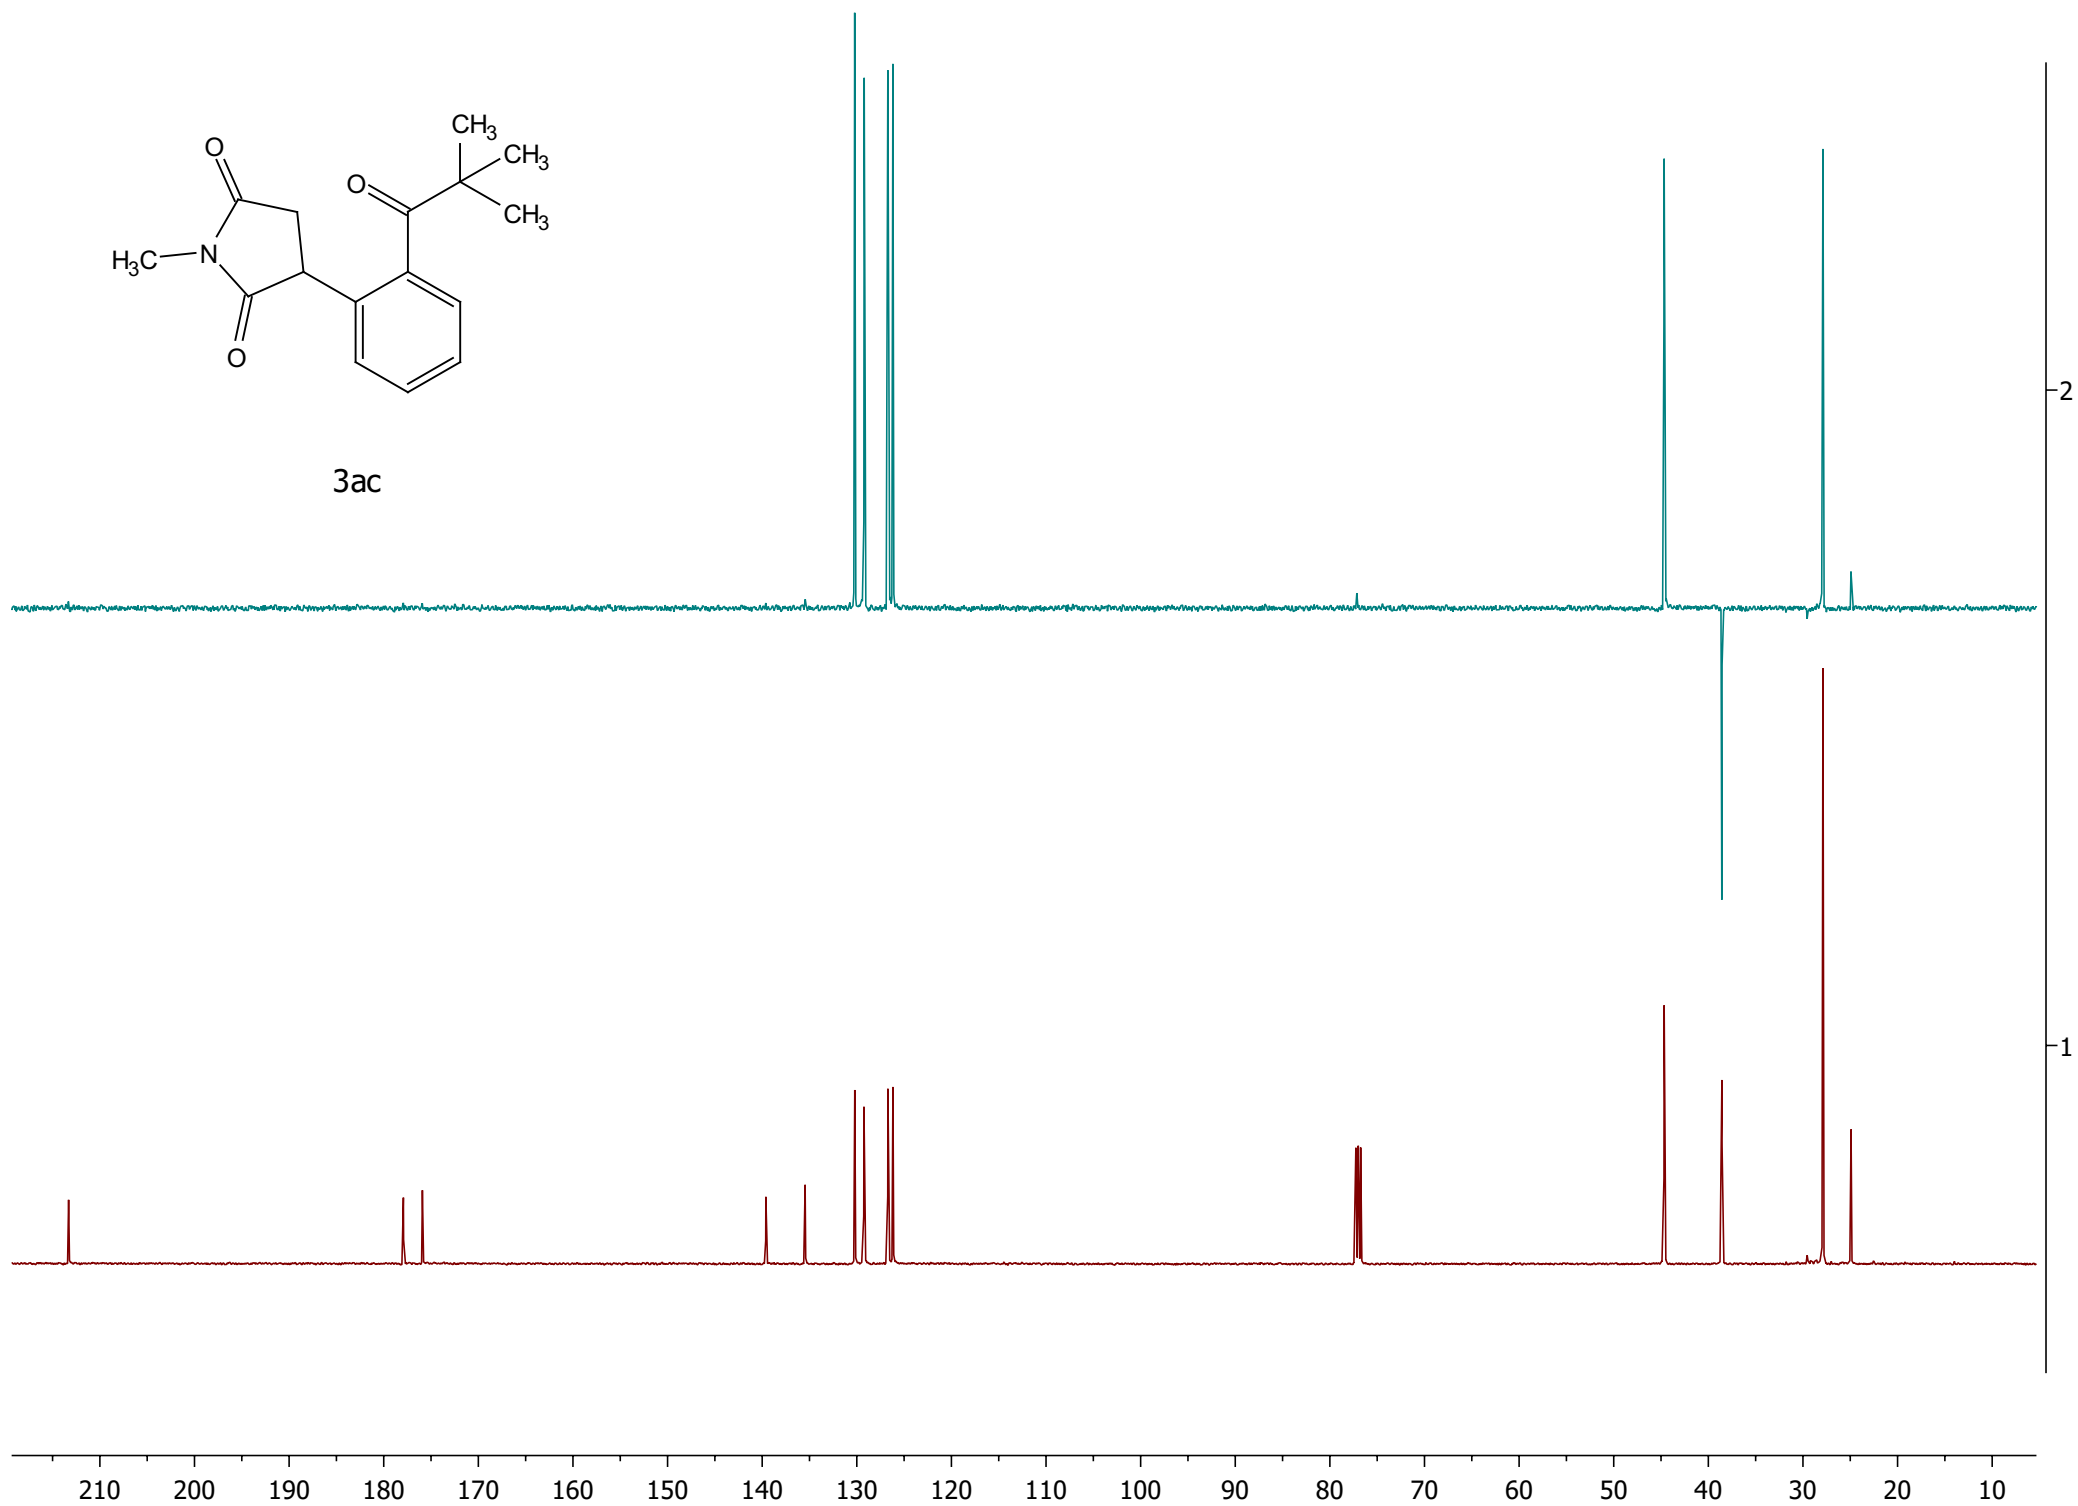

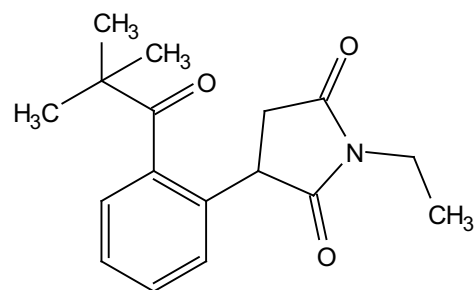

3ad

7.47  
7.47  
7.45  
7.45  
7.40  
7.40  
7.39  
7.38  
7.37  
7.37  
7.32  
7.32  
7.30  
7.30  
7.29  
7.29  
7.12  
7.10

3.92  
3.90  
3.90  
3.89  
3.66  
3.56  
3.15  
3.13  
3.12  
3.10  
2.76  
2.75  
2.73  
2.72

1.31  
1.24  
1.22  
1.21

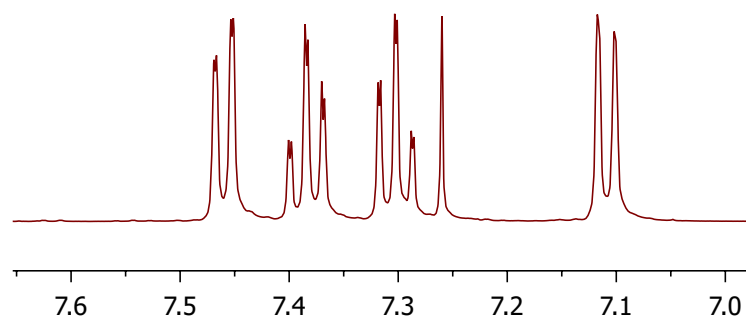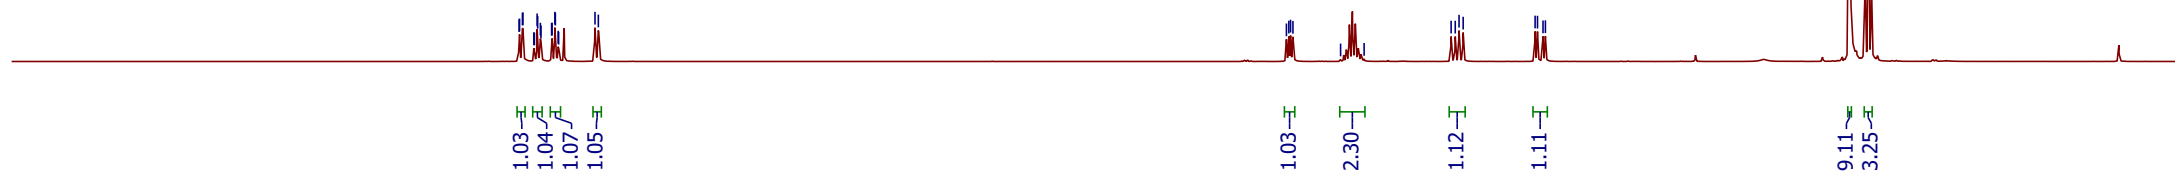

9.5 9.0 8.5 8.0 7.5 7.0 6.5 6.0 5.5 5.0 4.5 4.0 3.5 3.0 2.5 2.0 1.5 1.0 0.5 0.0

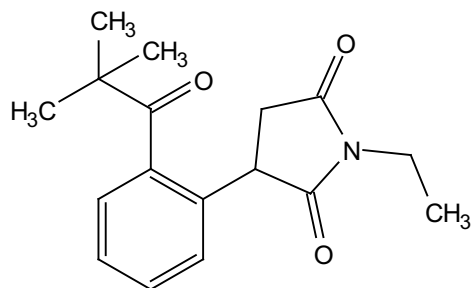

3ad

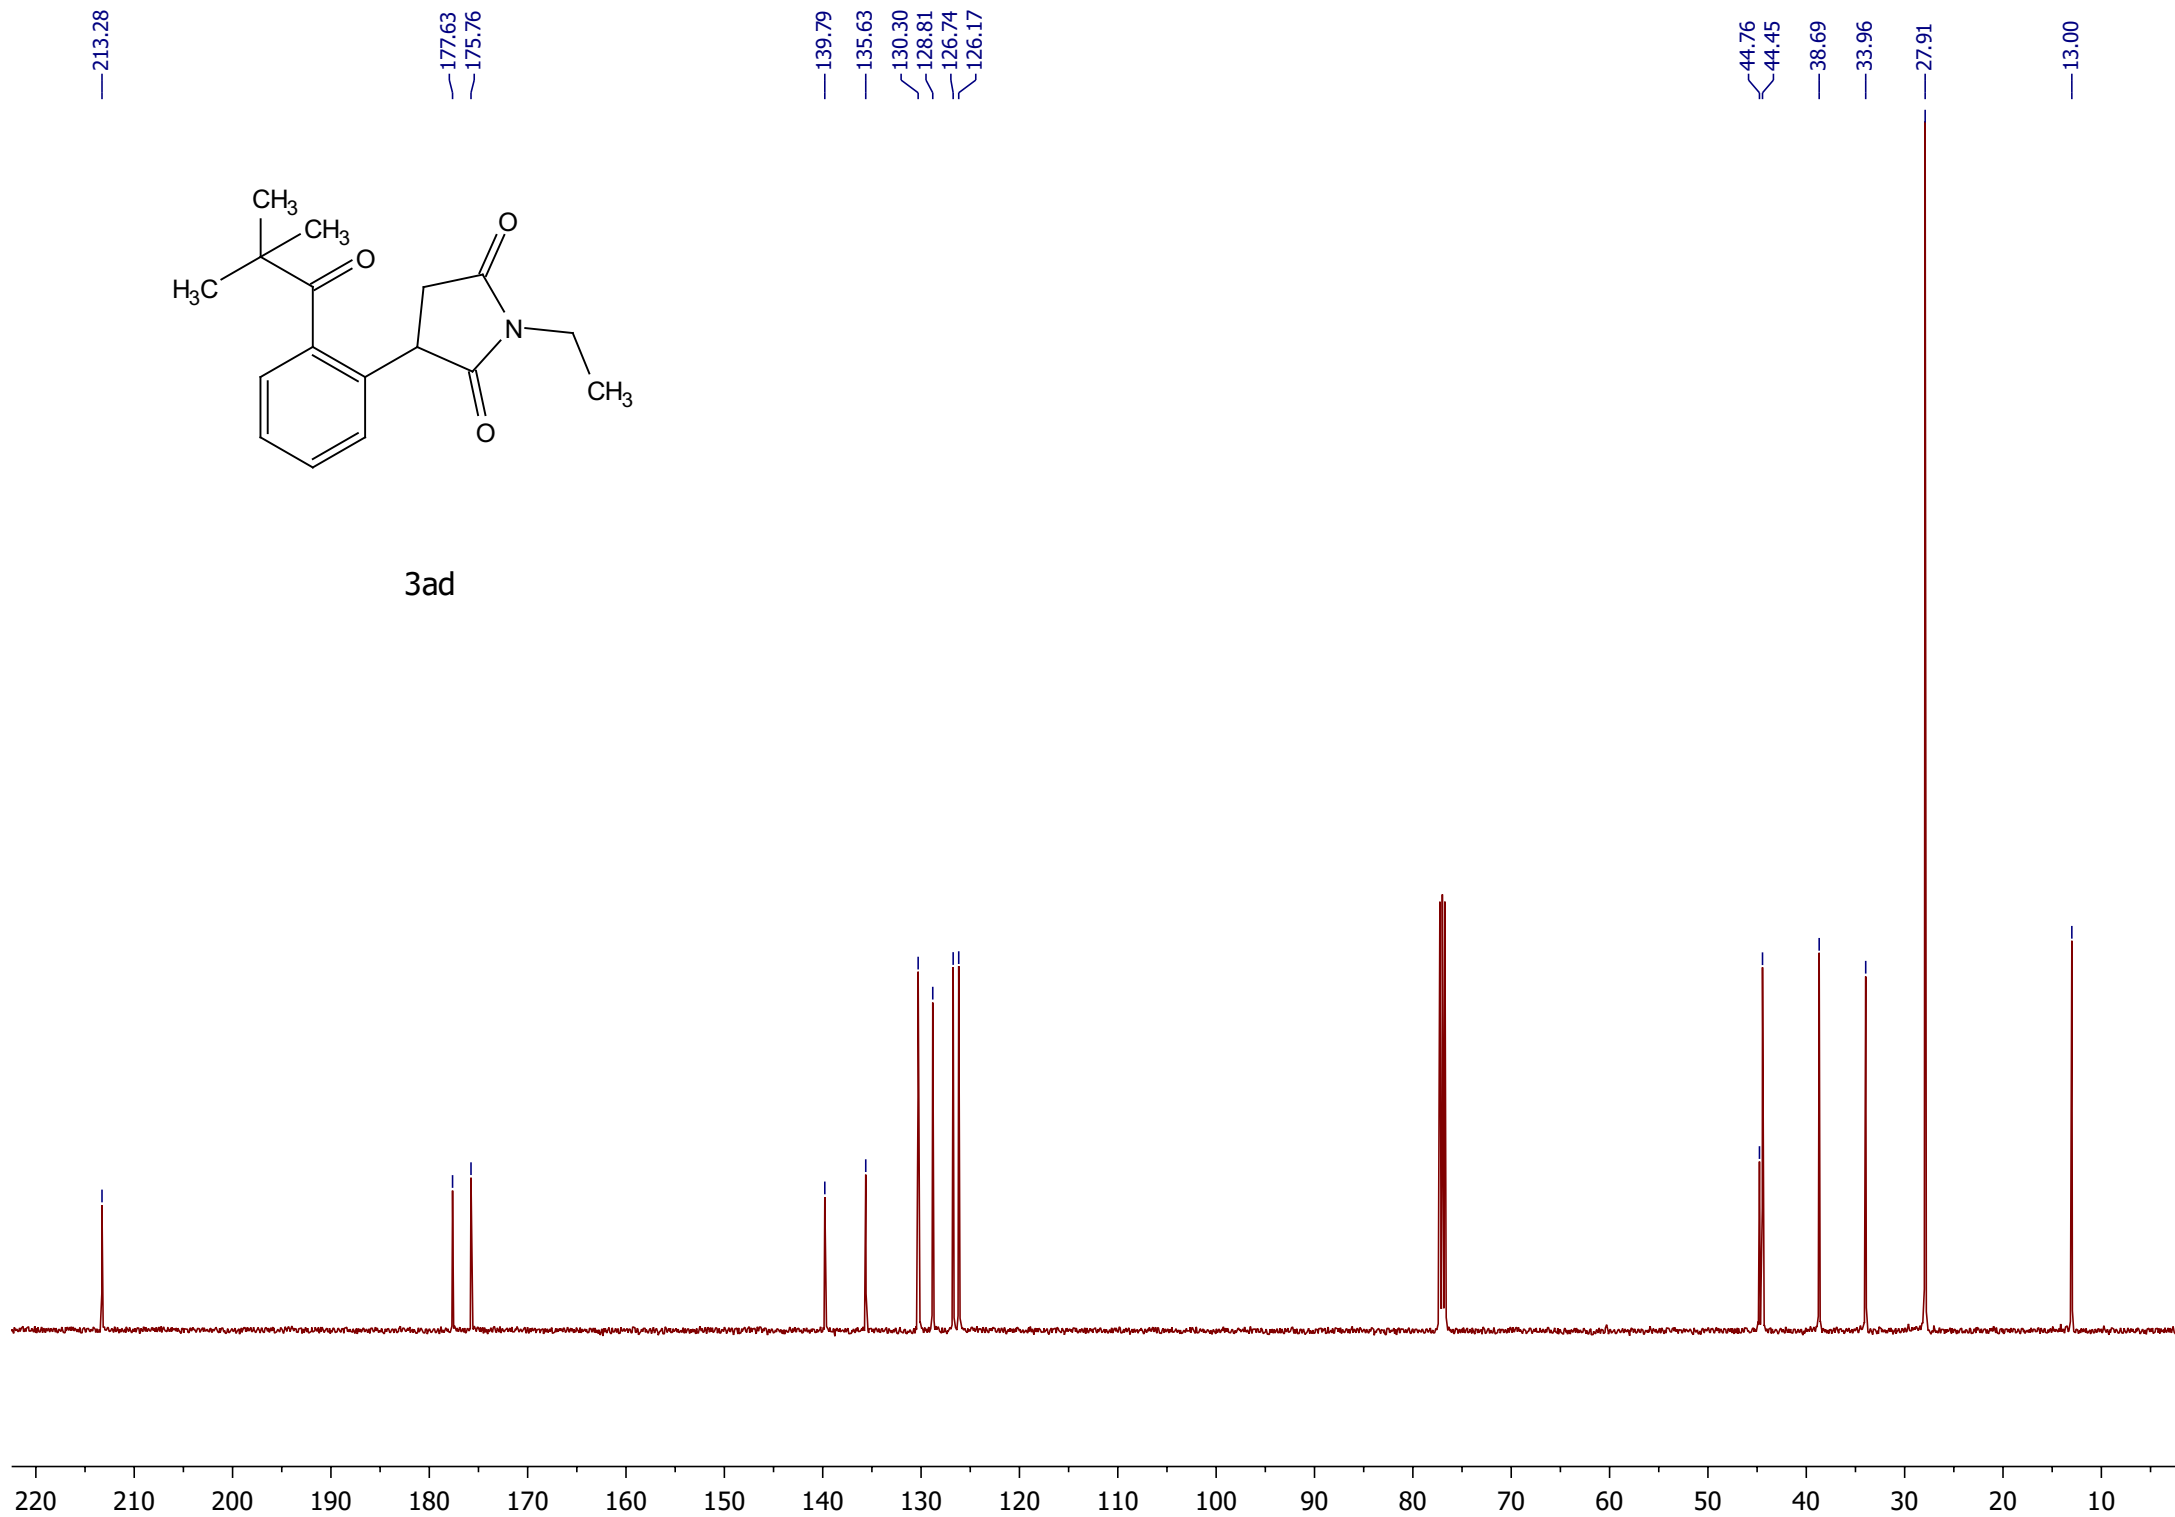

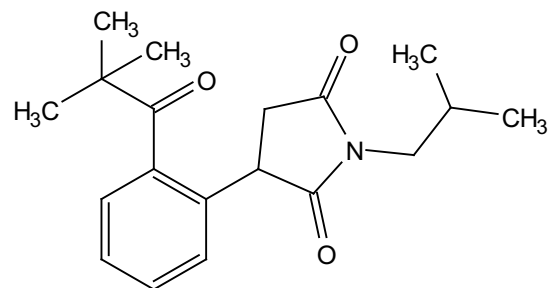

3ae

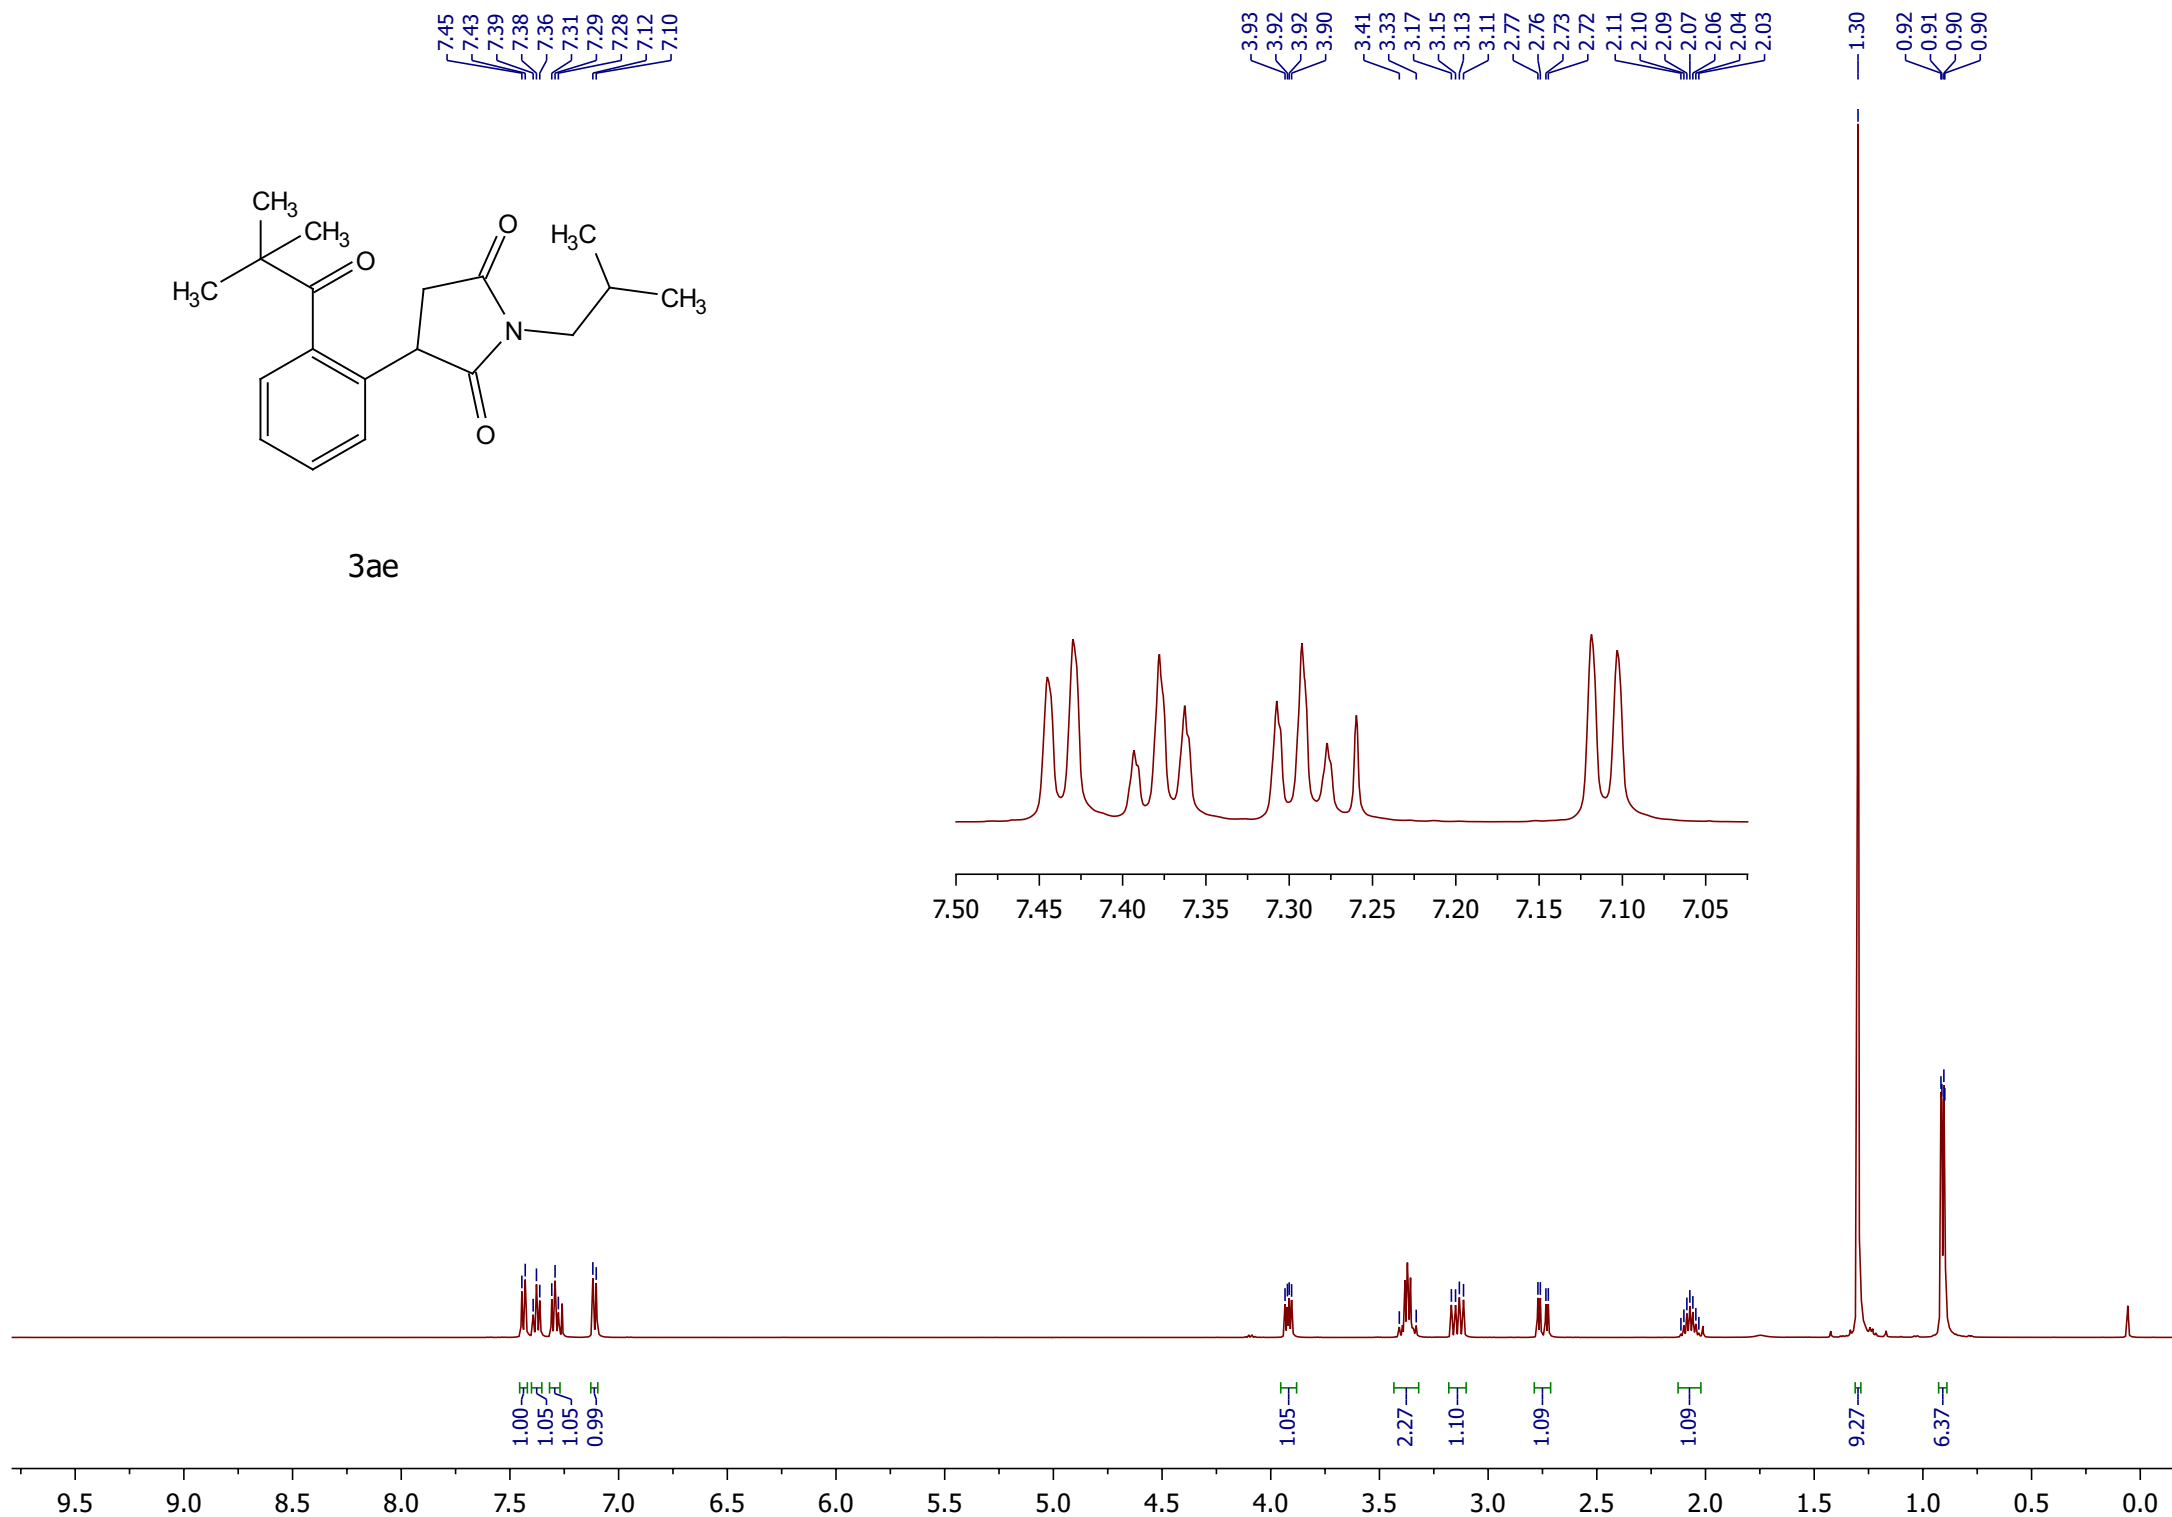

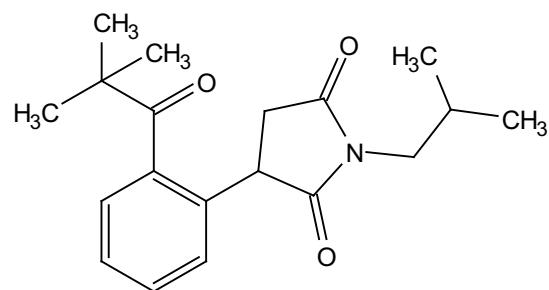

3ae

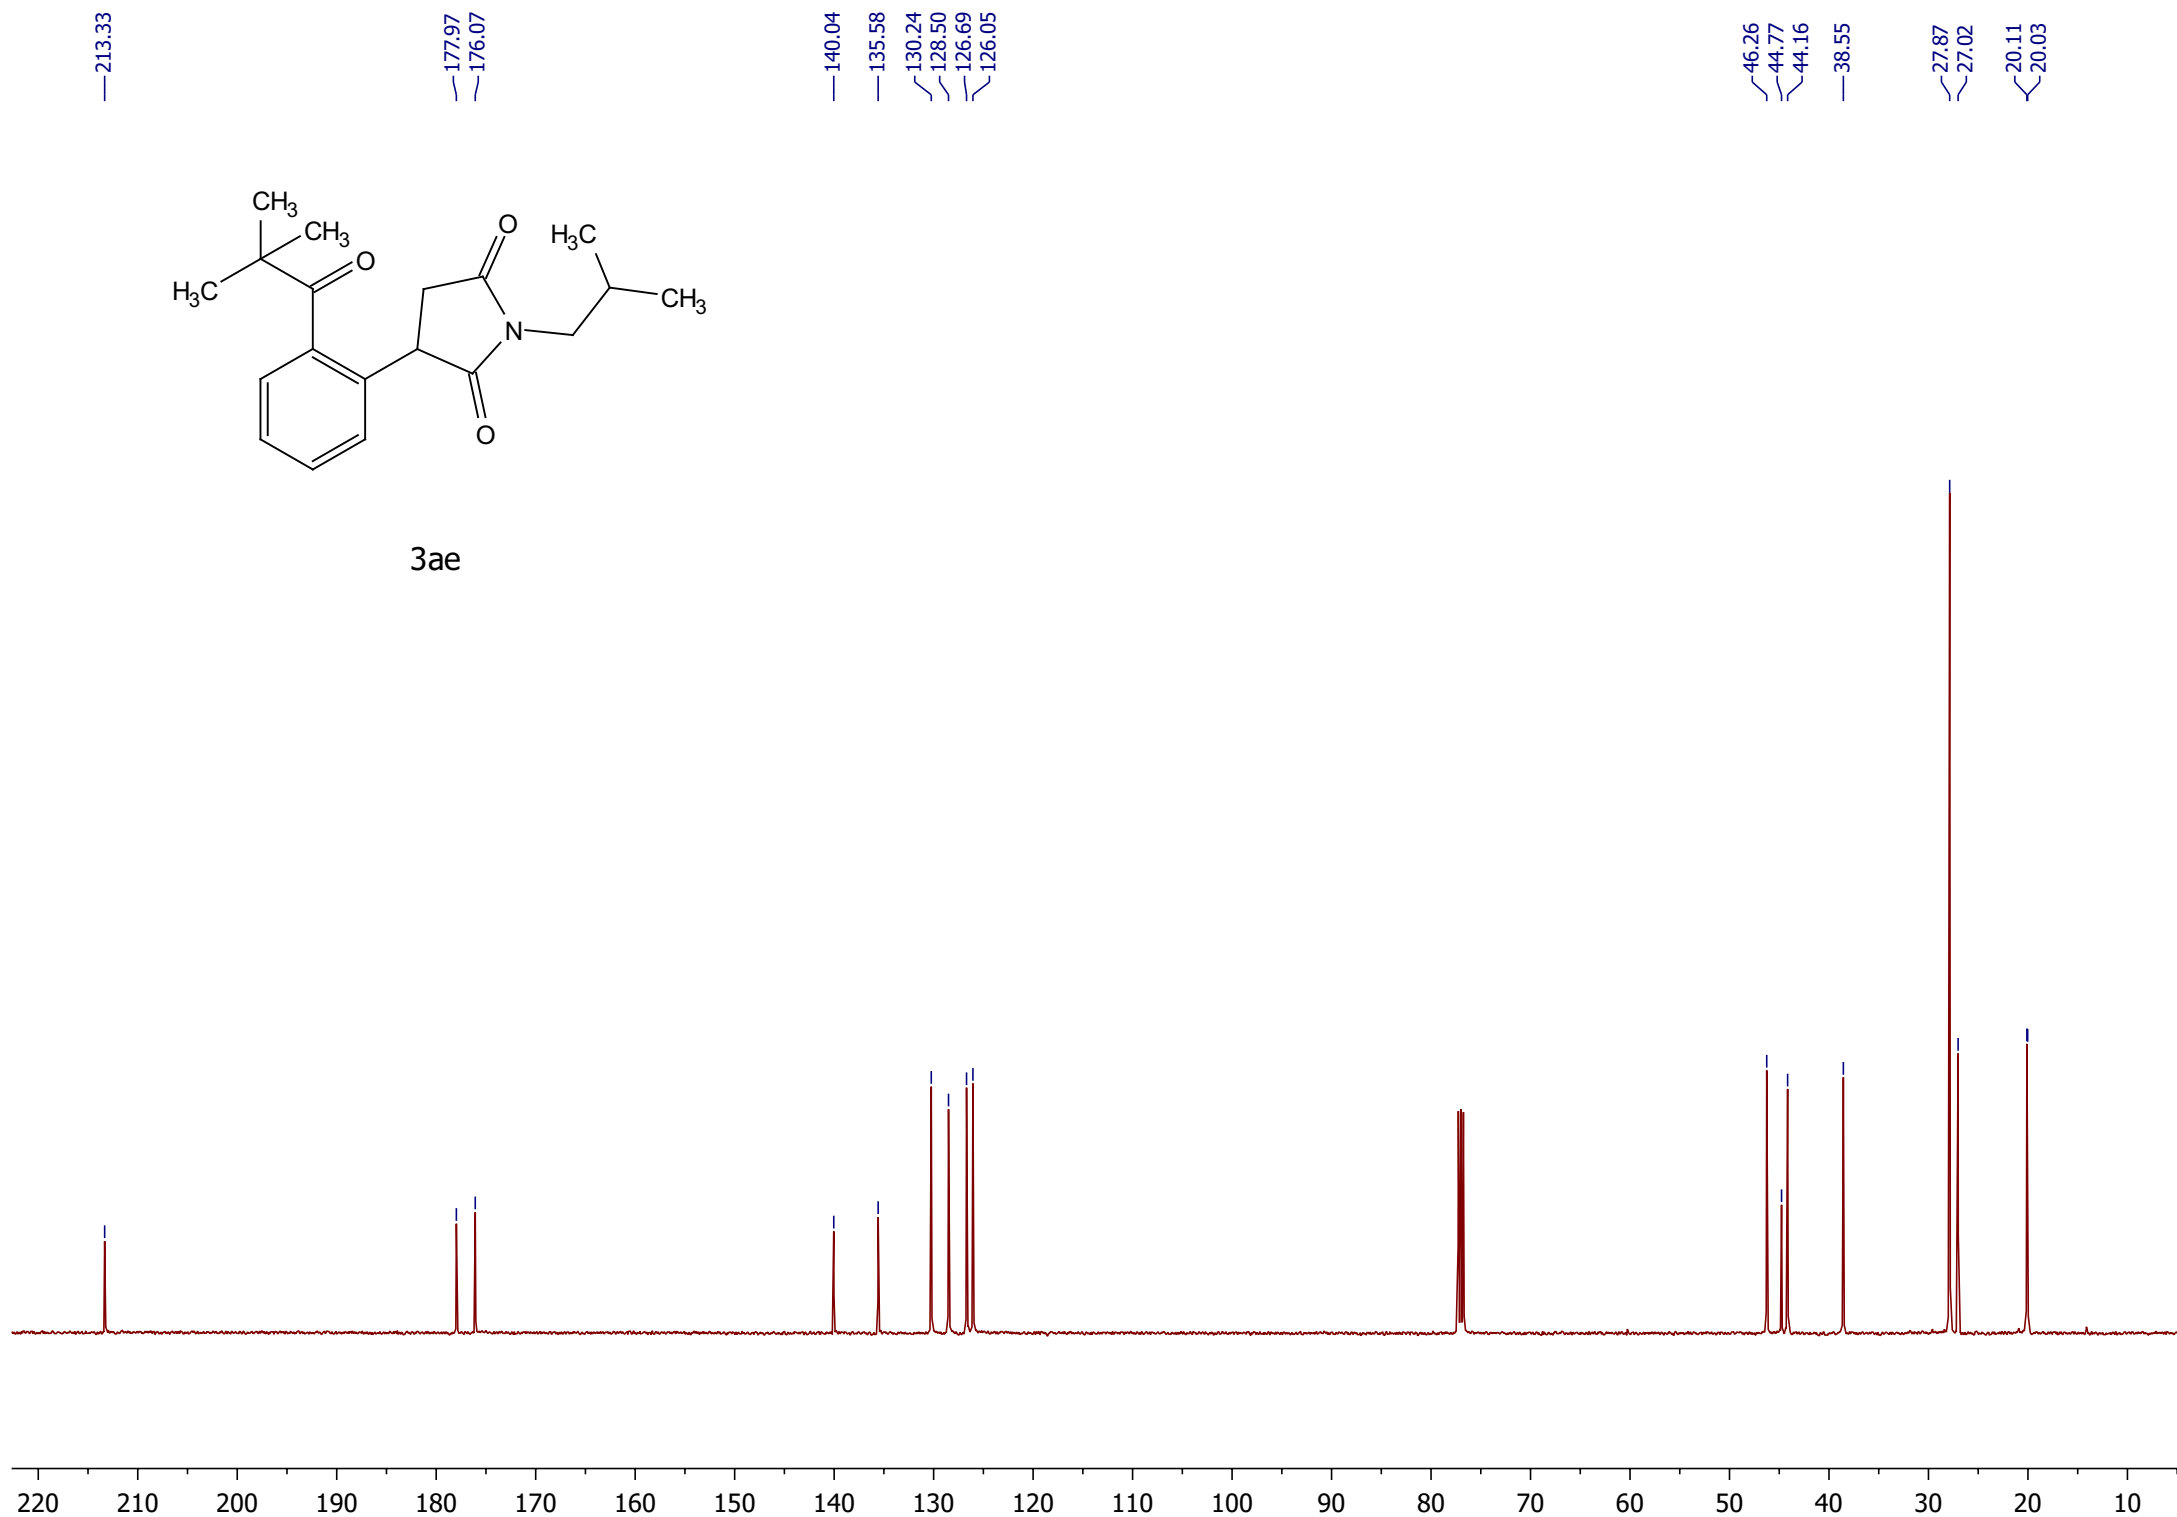

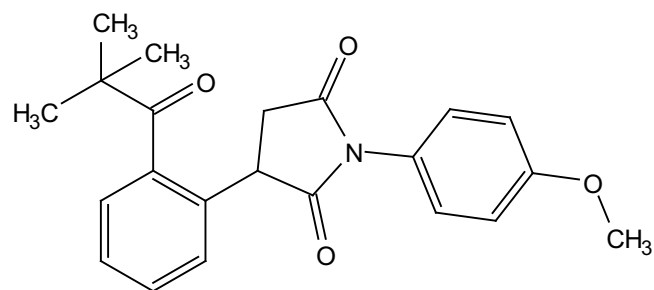

3af

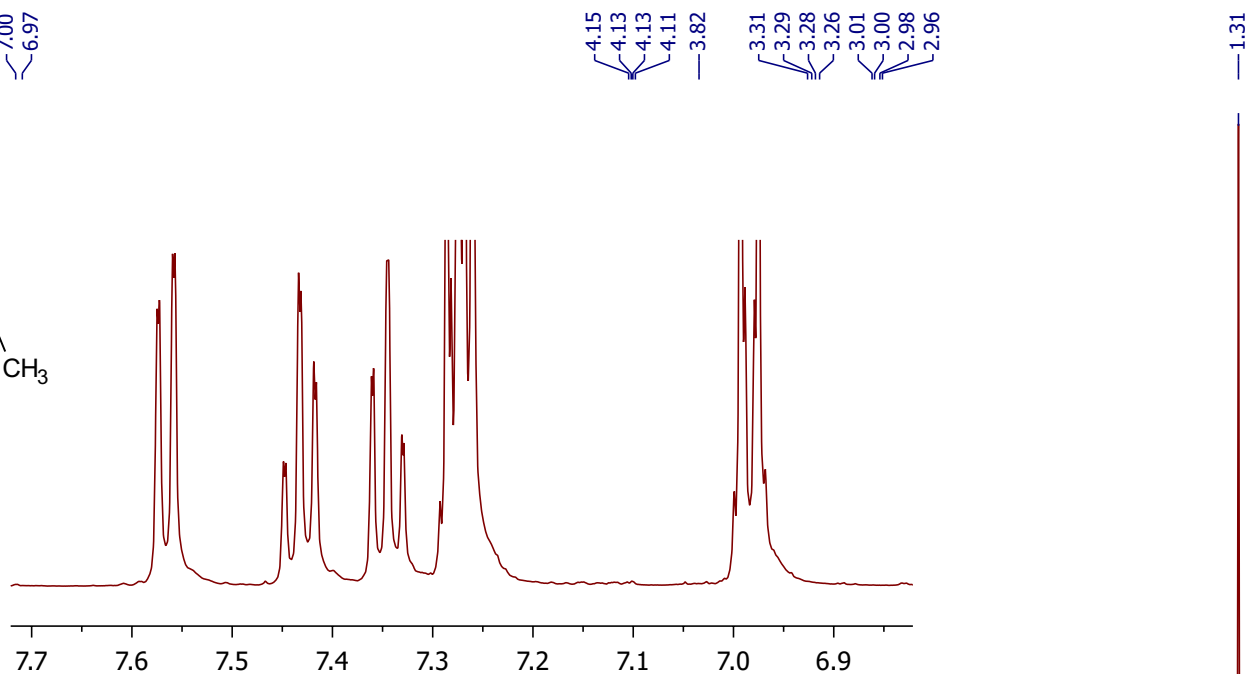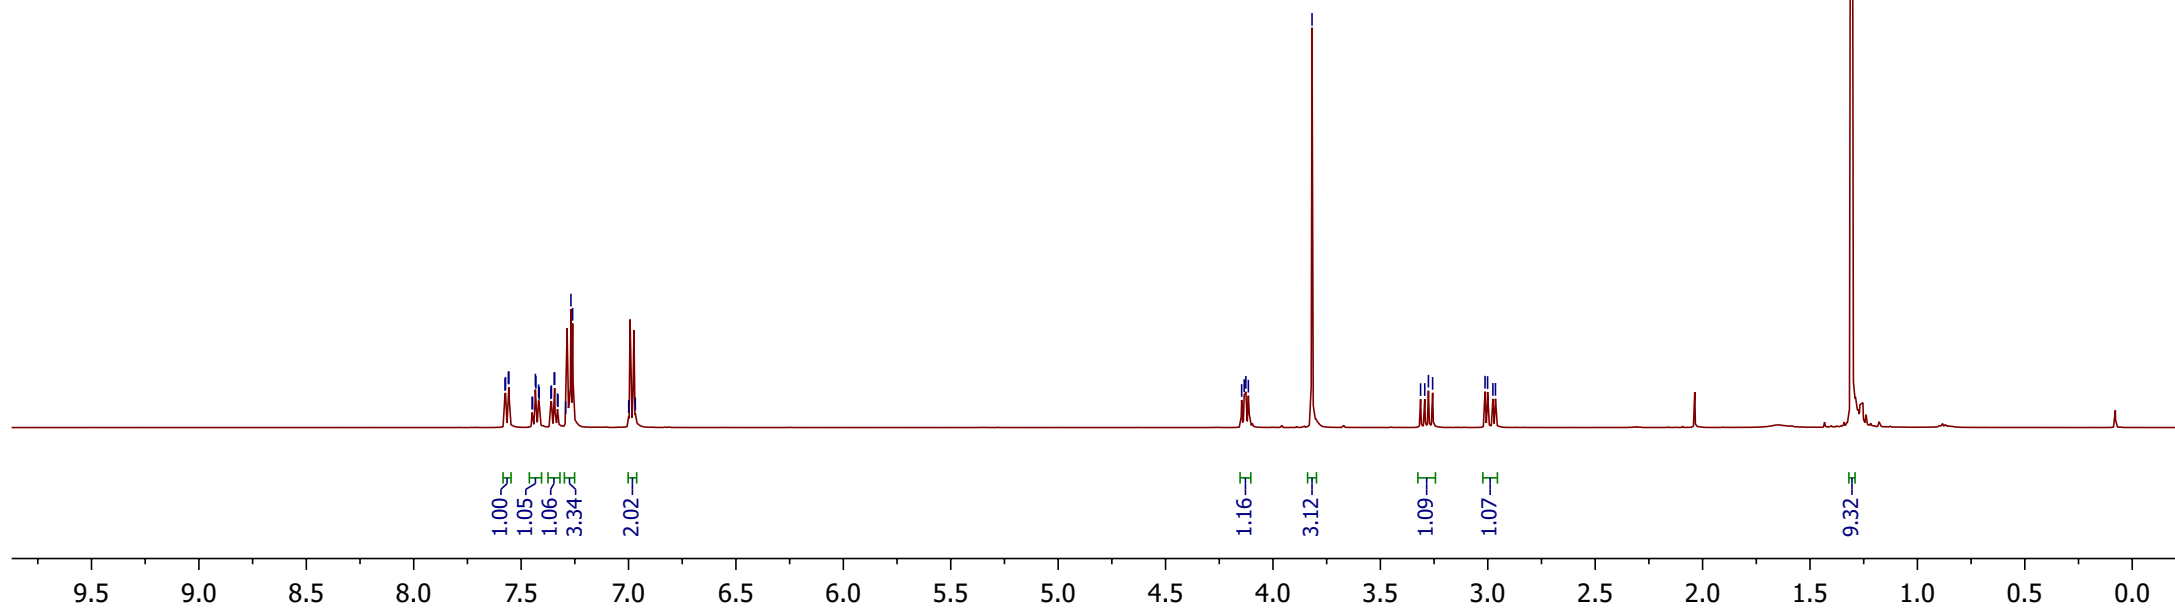

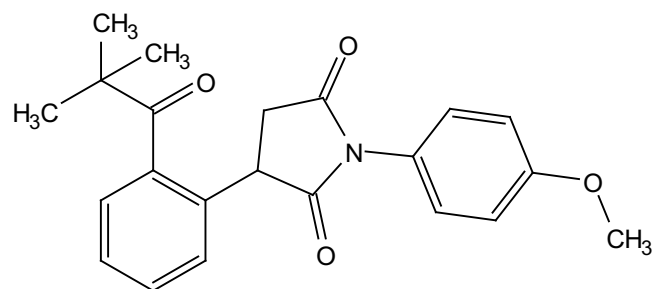

3af

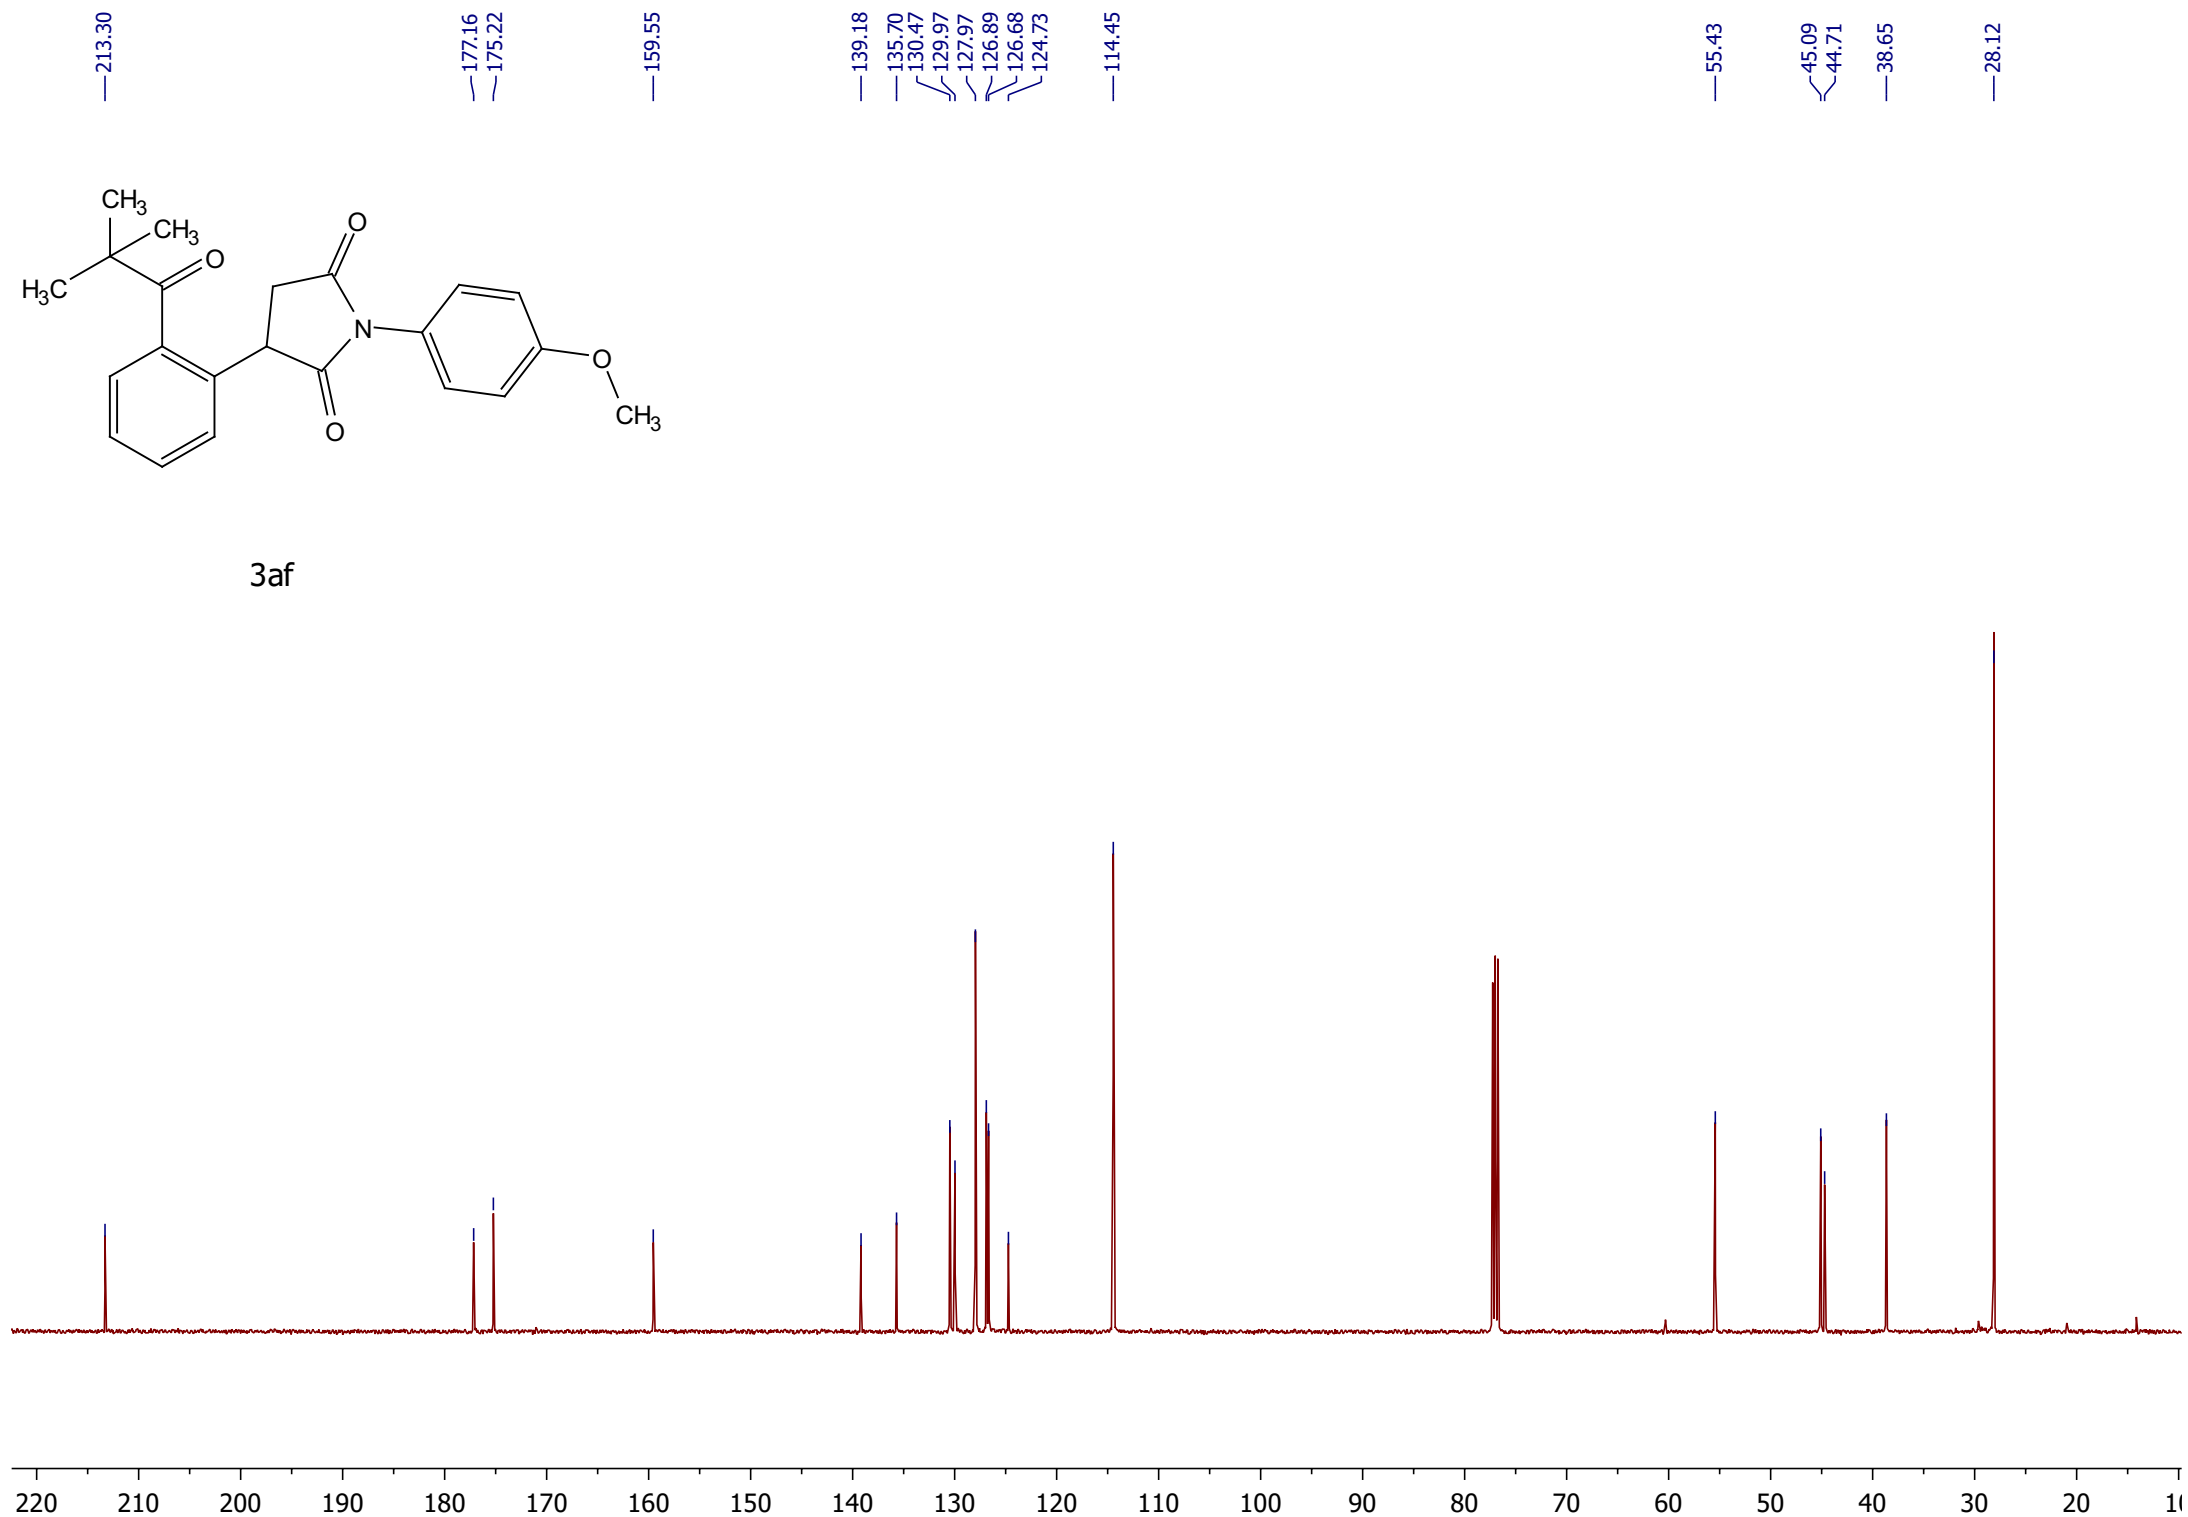

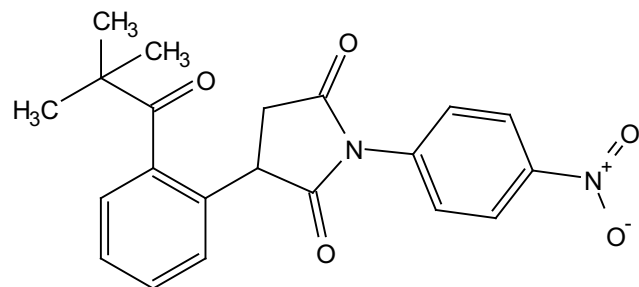

3ag

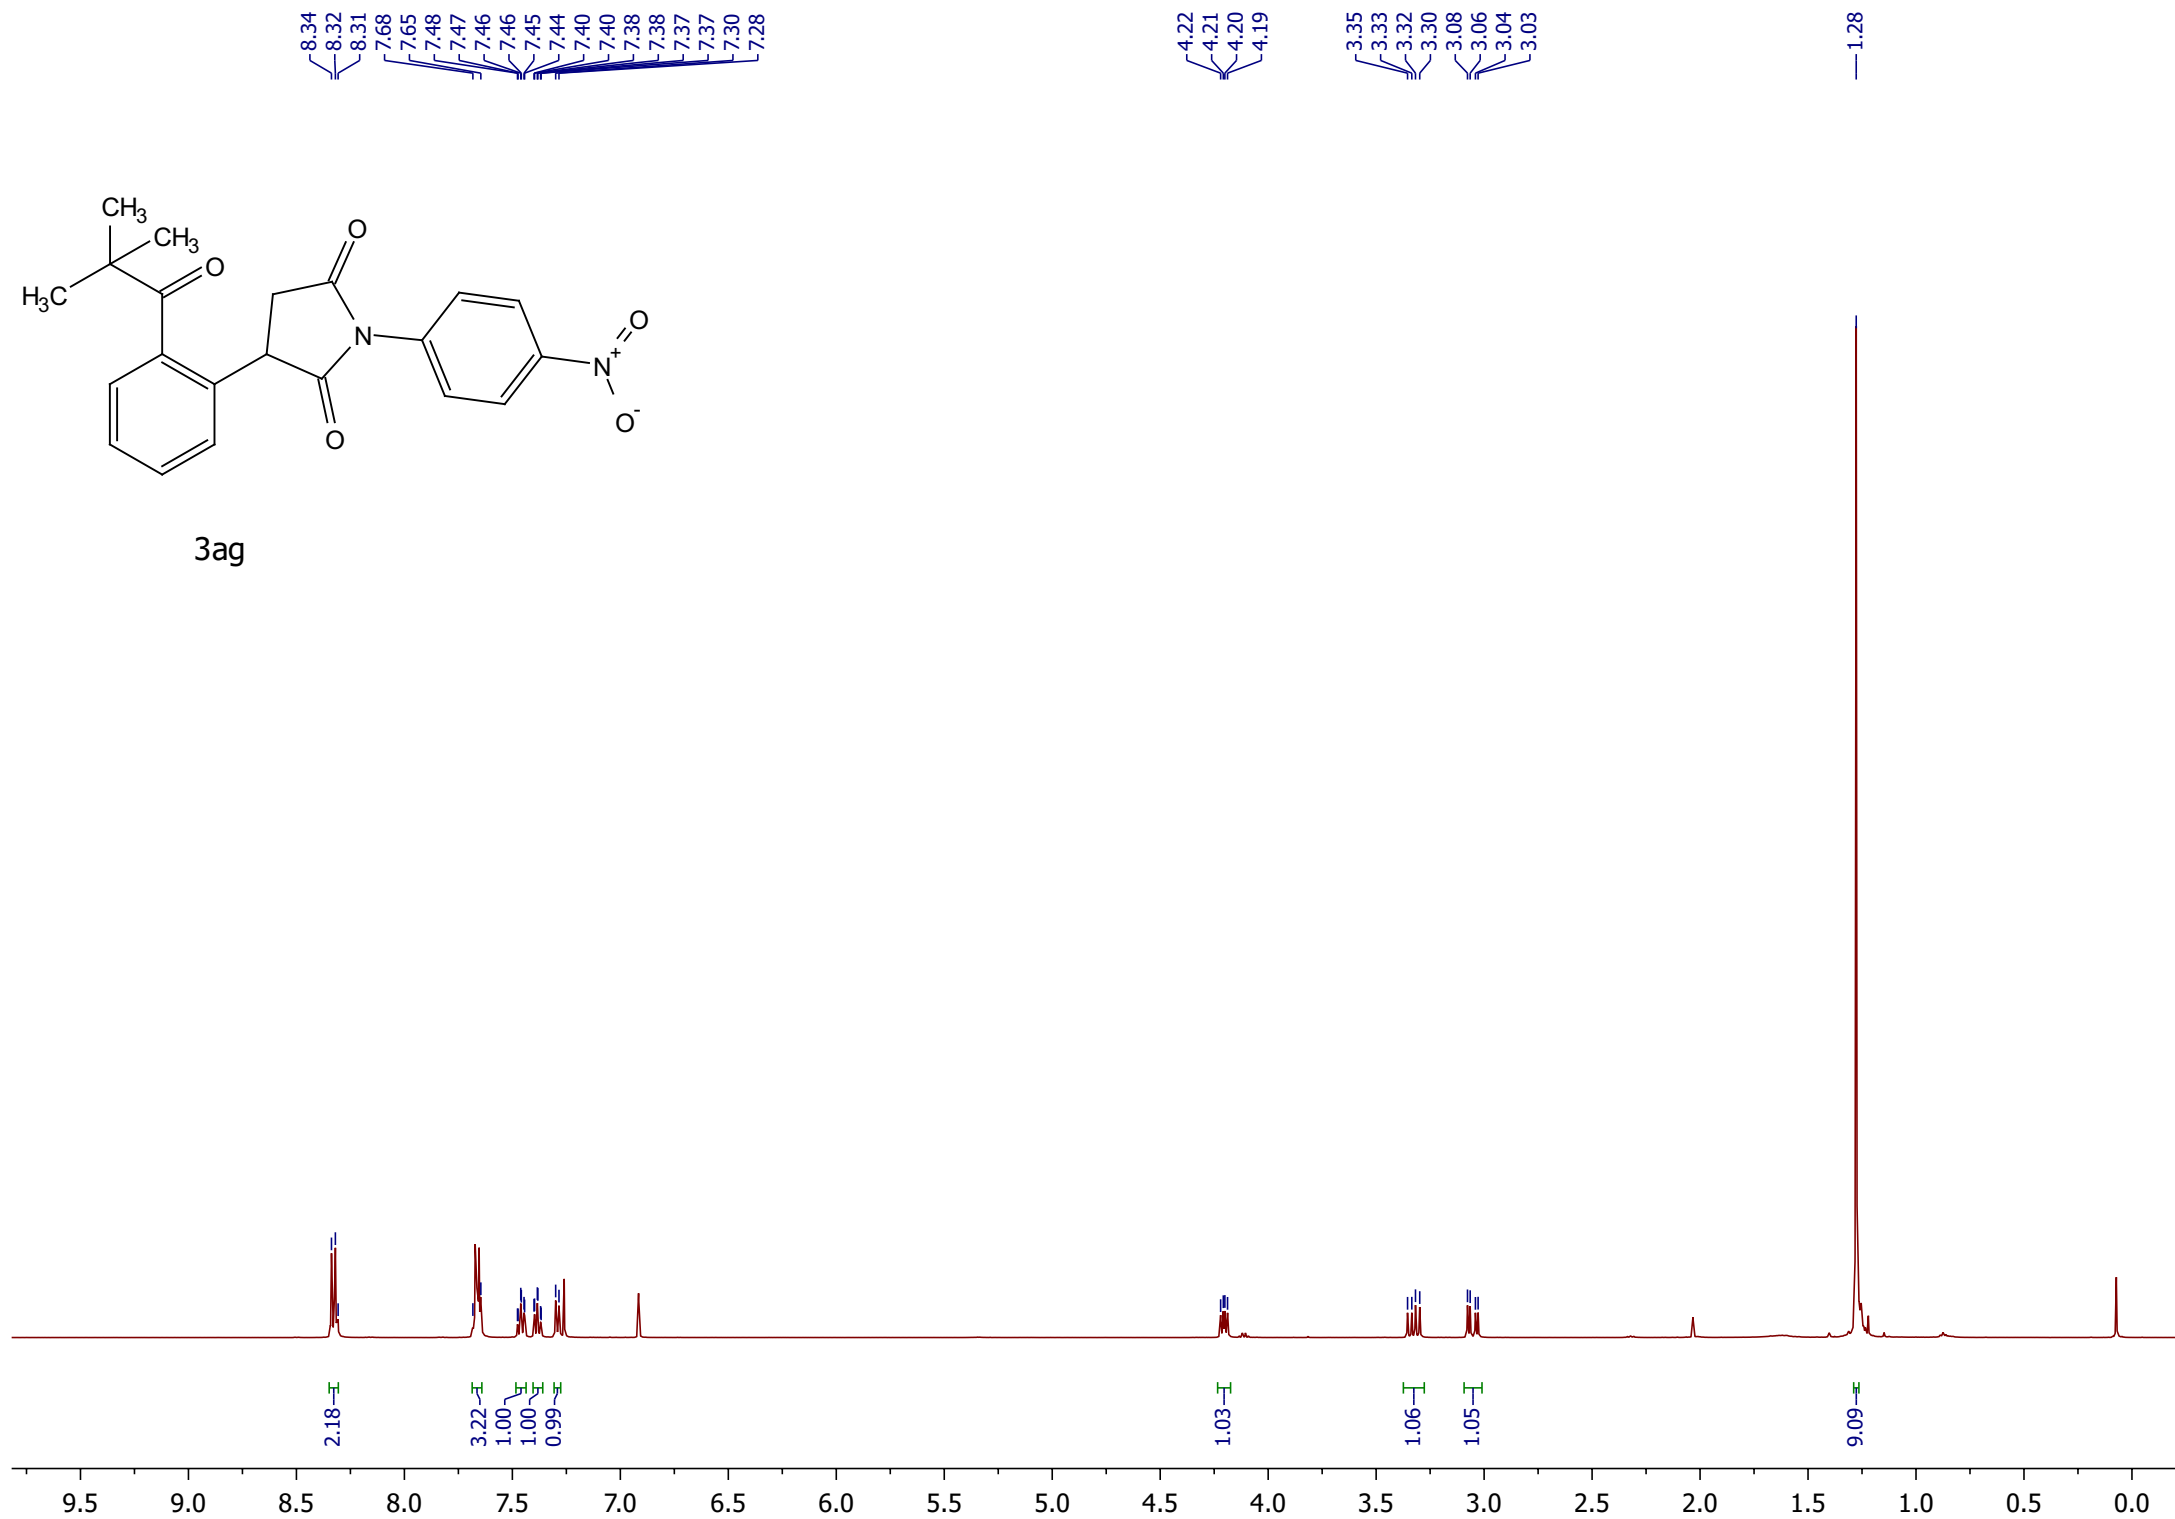

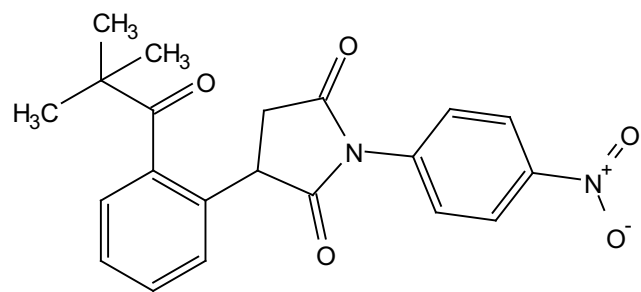

3ag

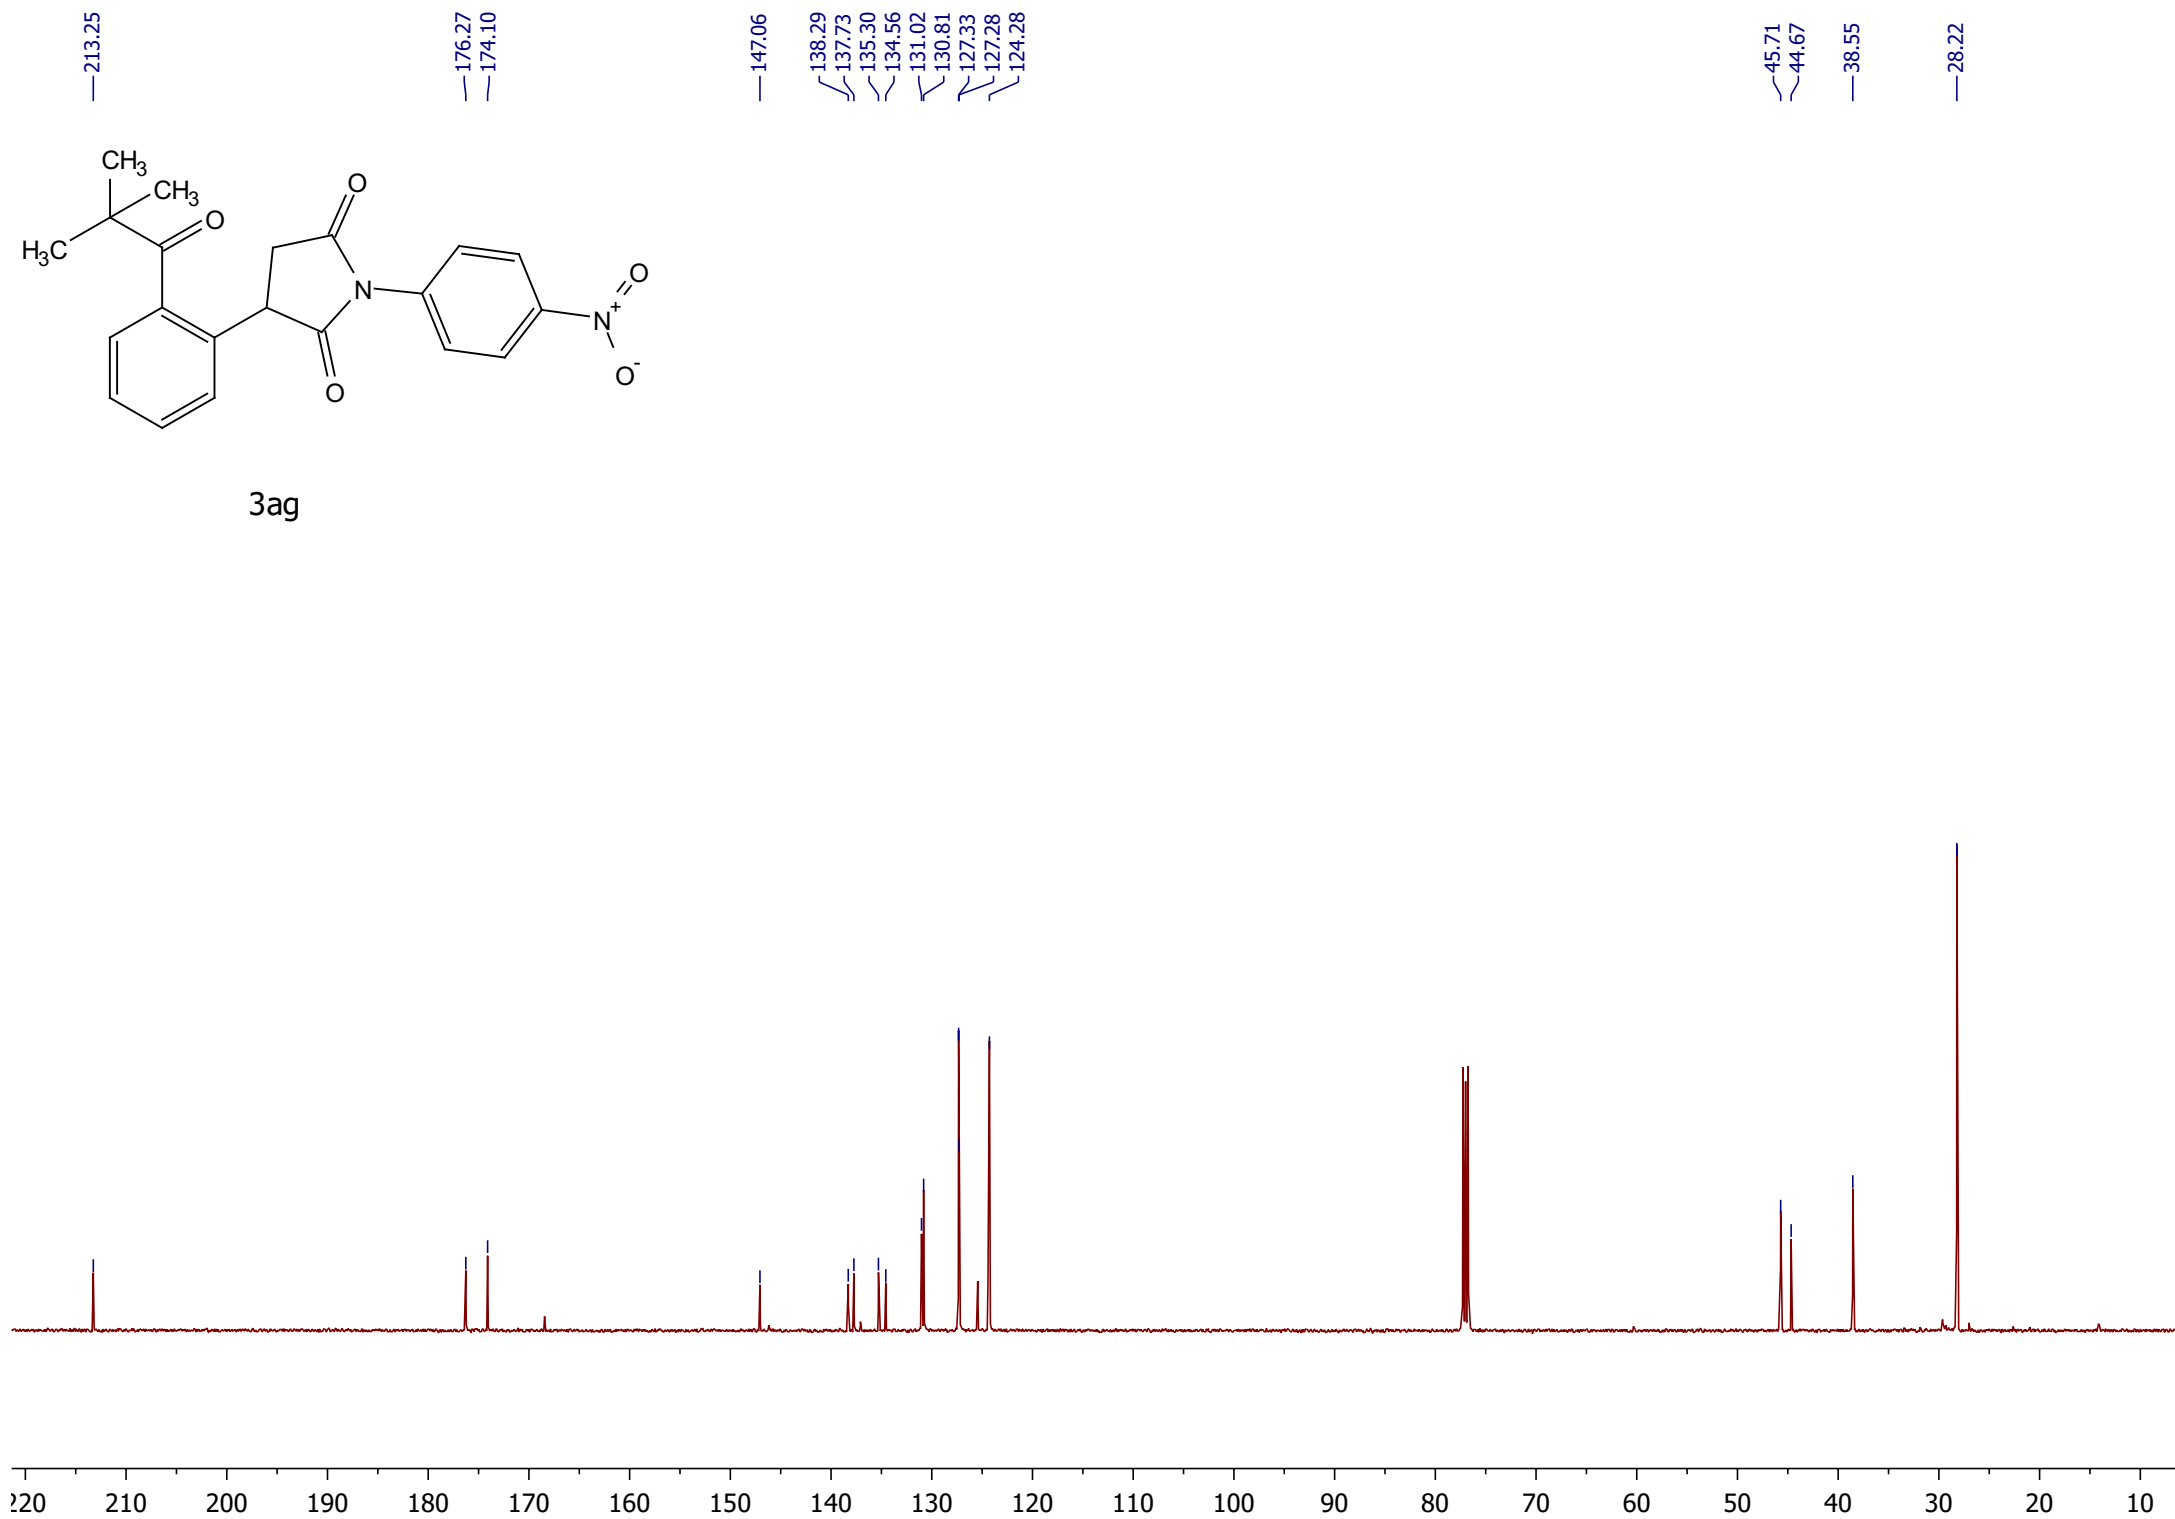

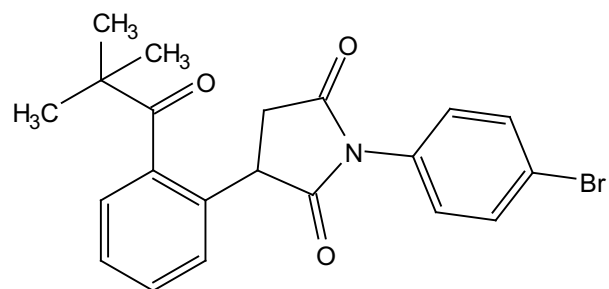

3ah

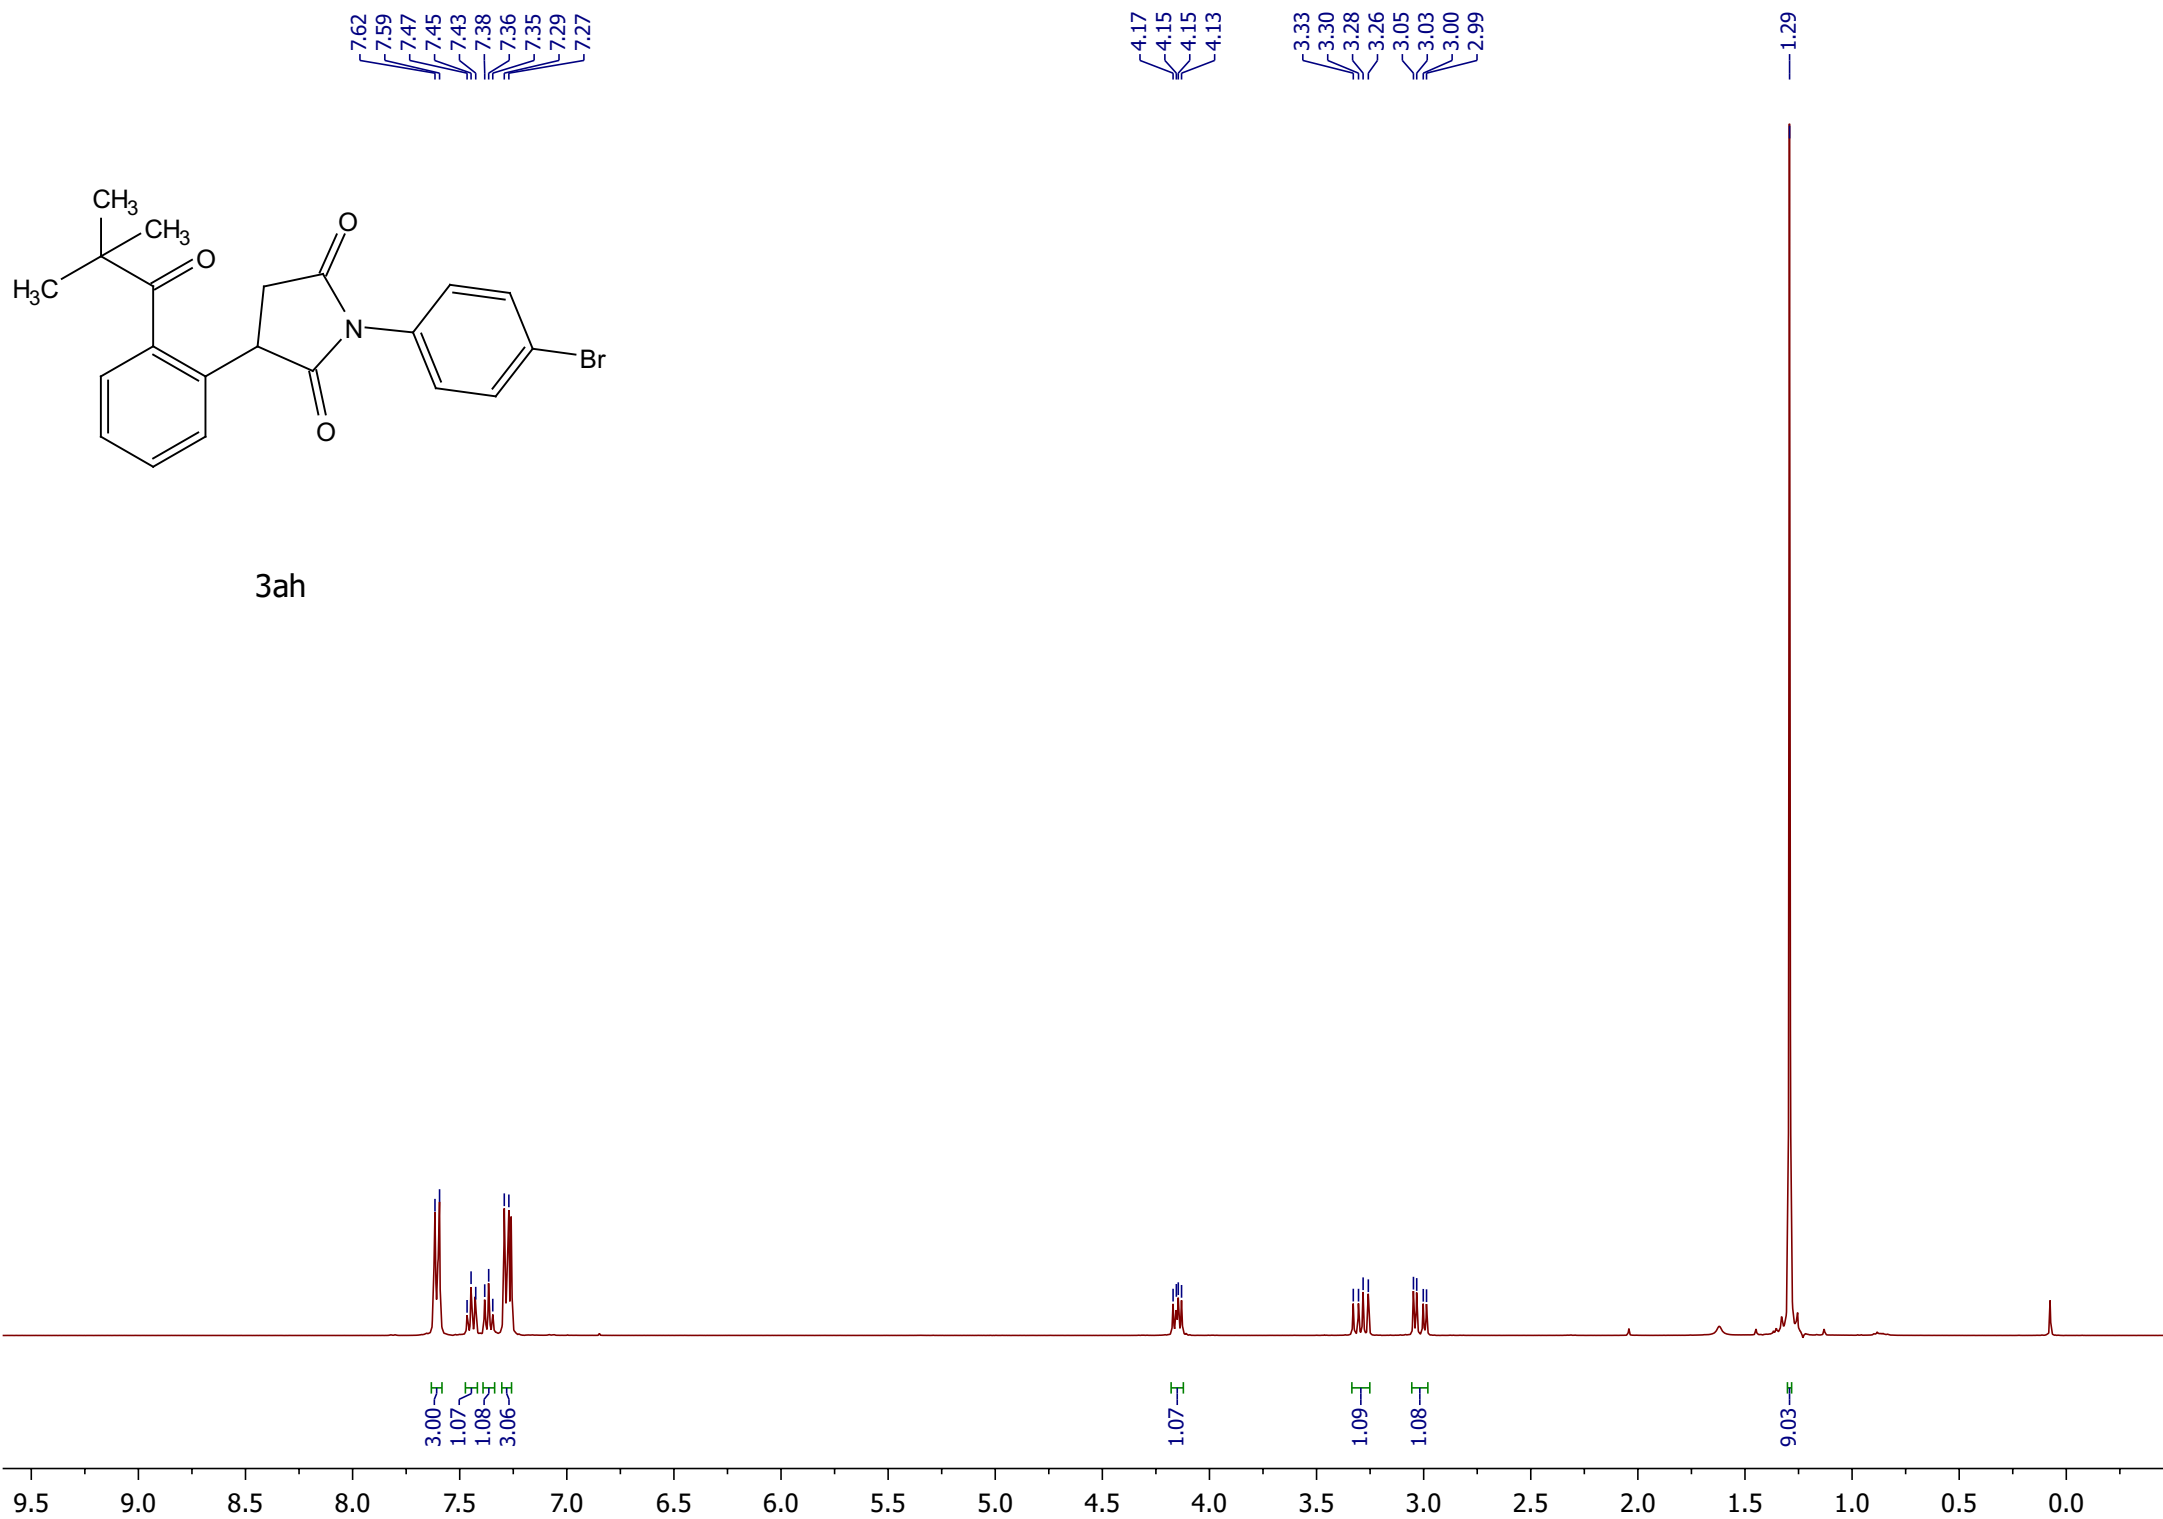

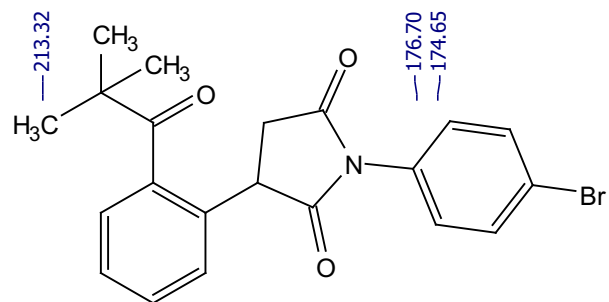

3ah

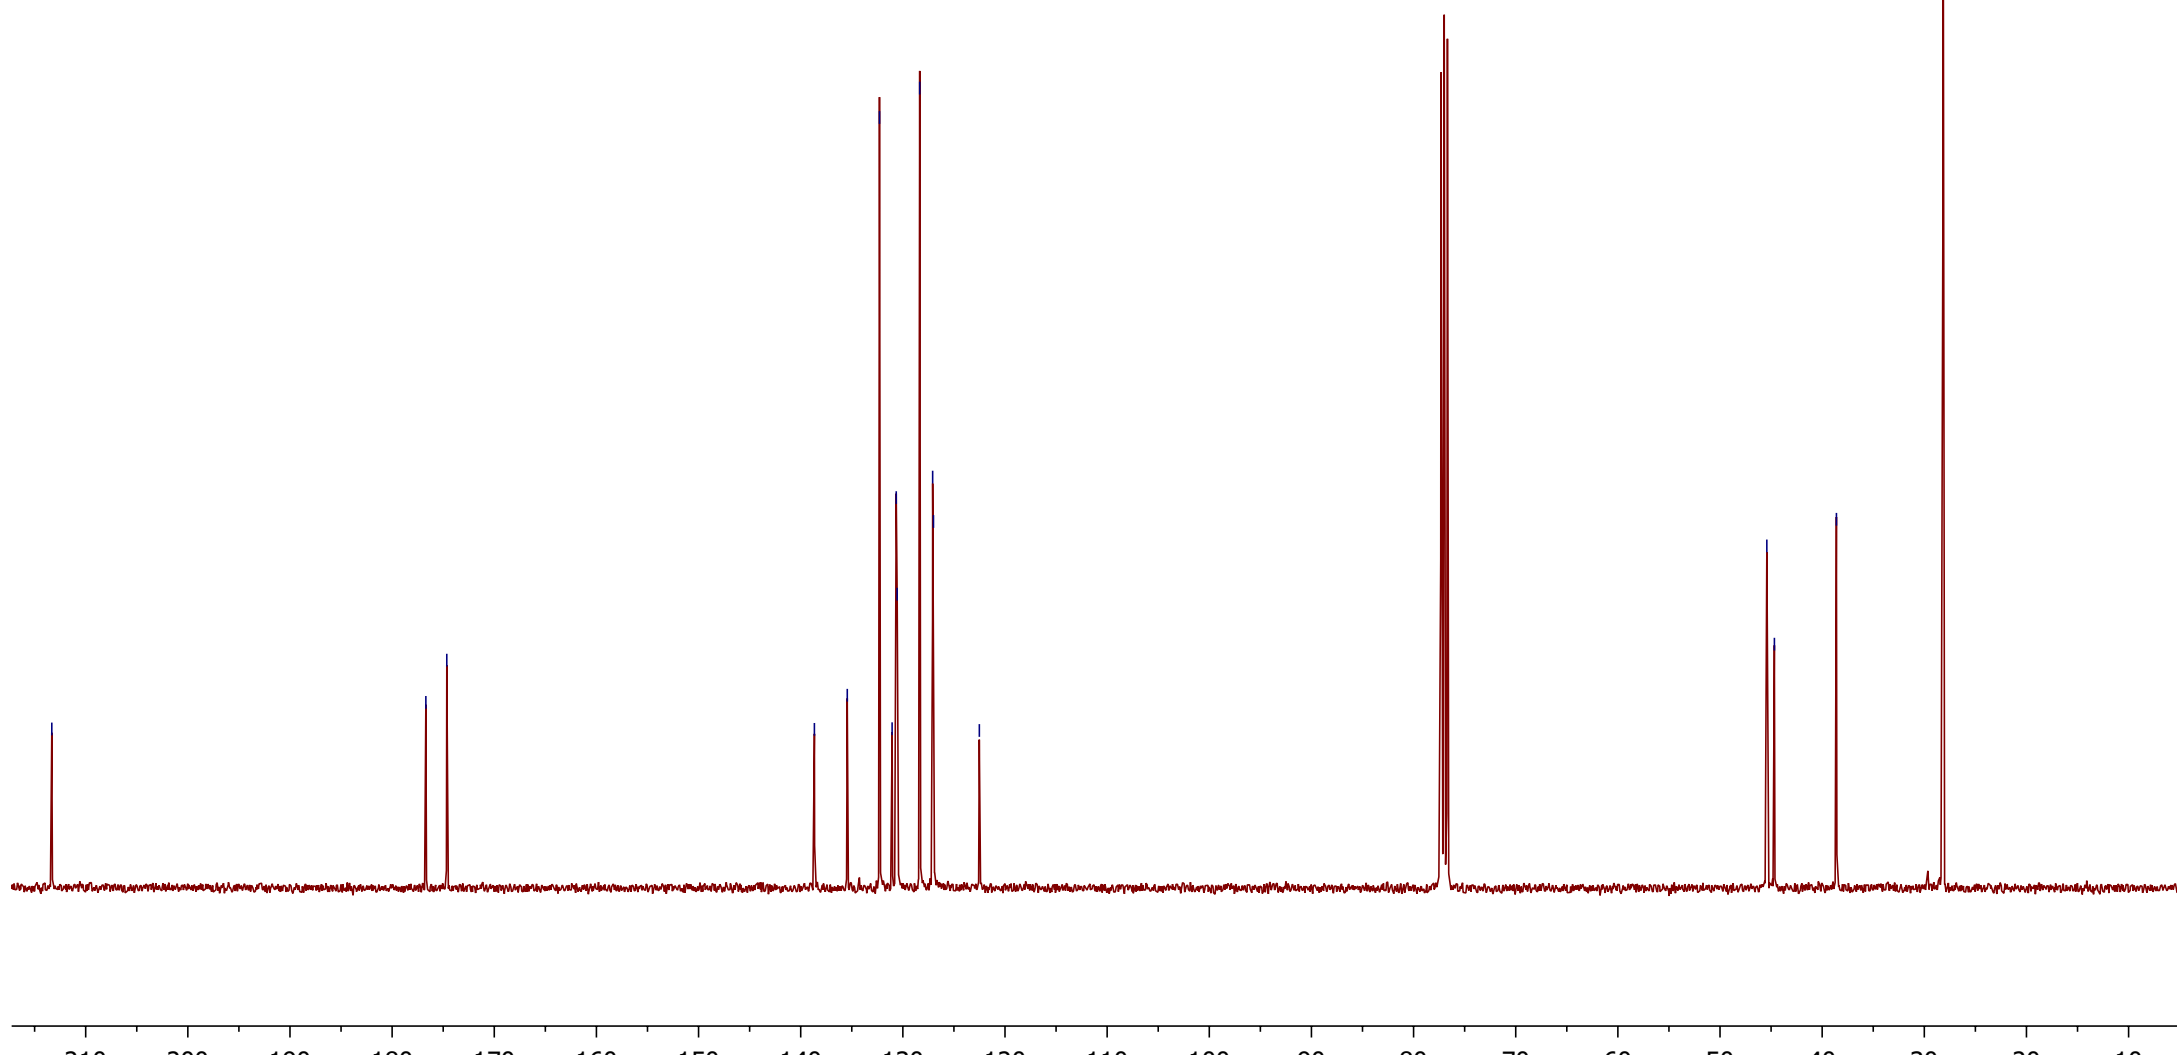

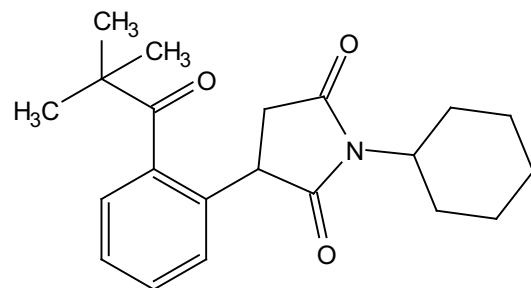

3ai

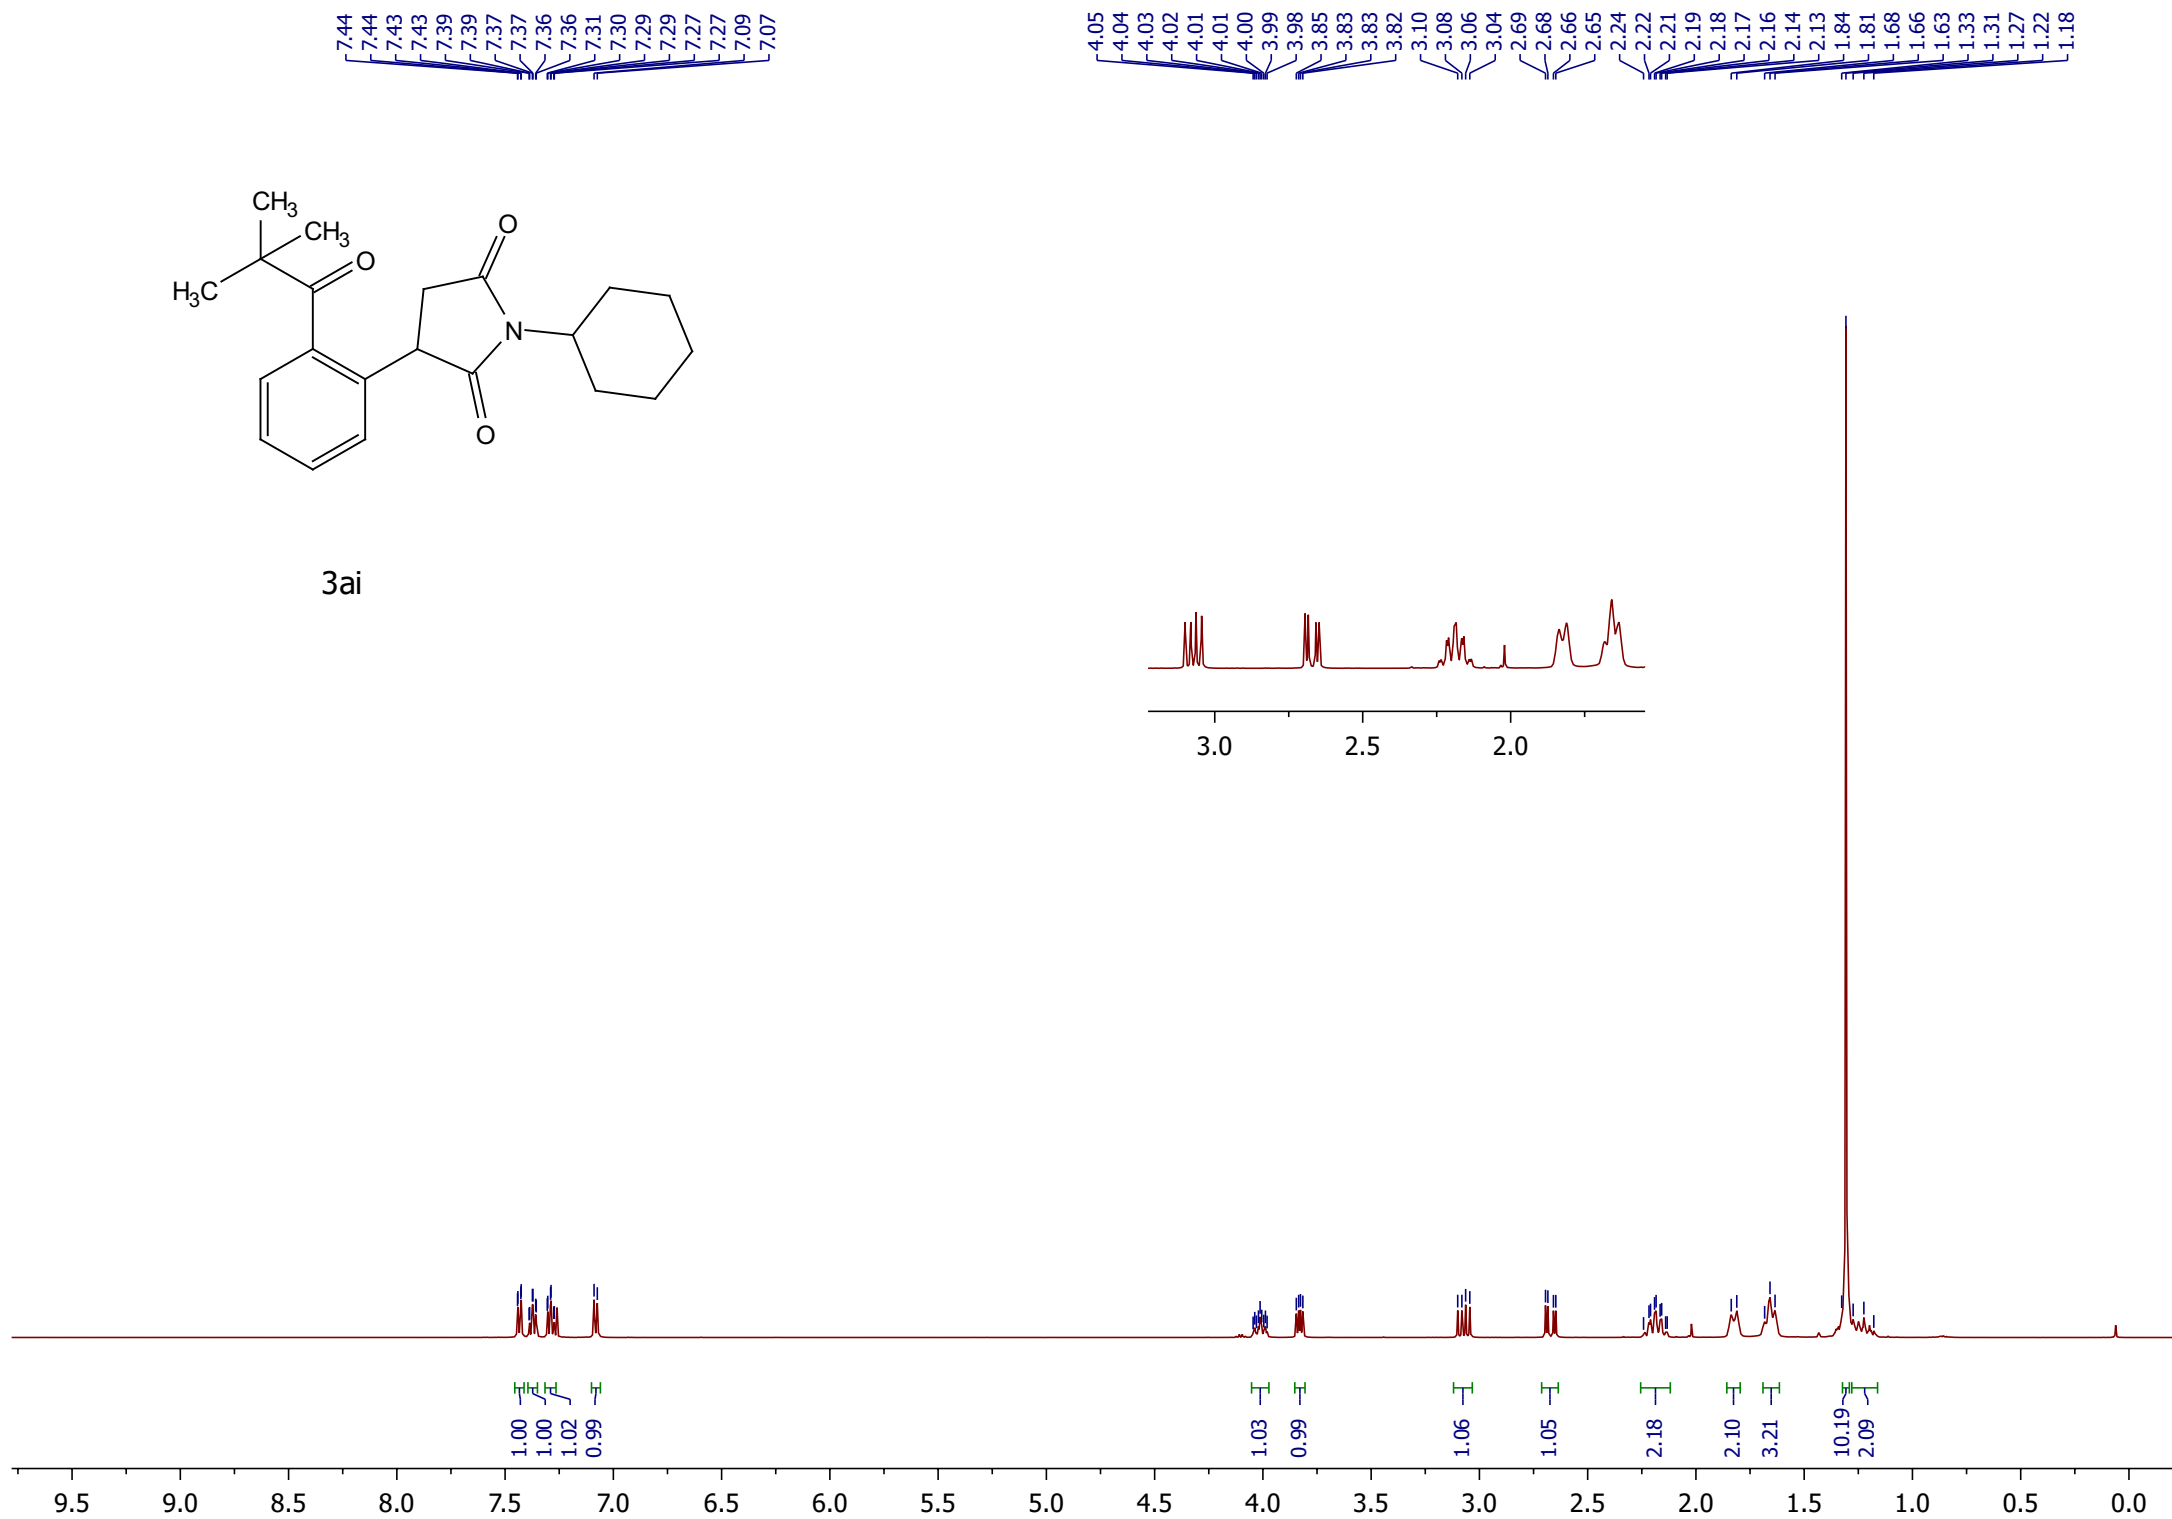

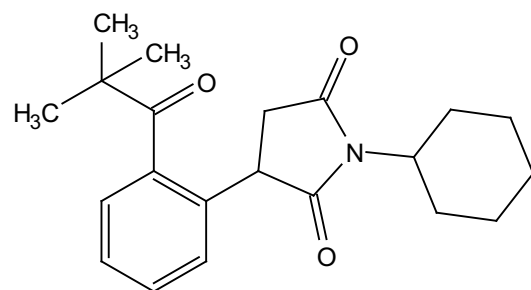

3ai

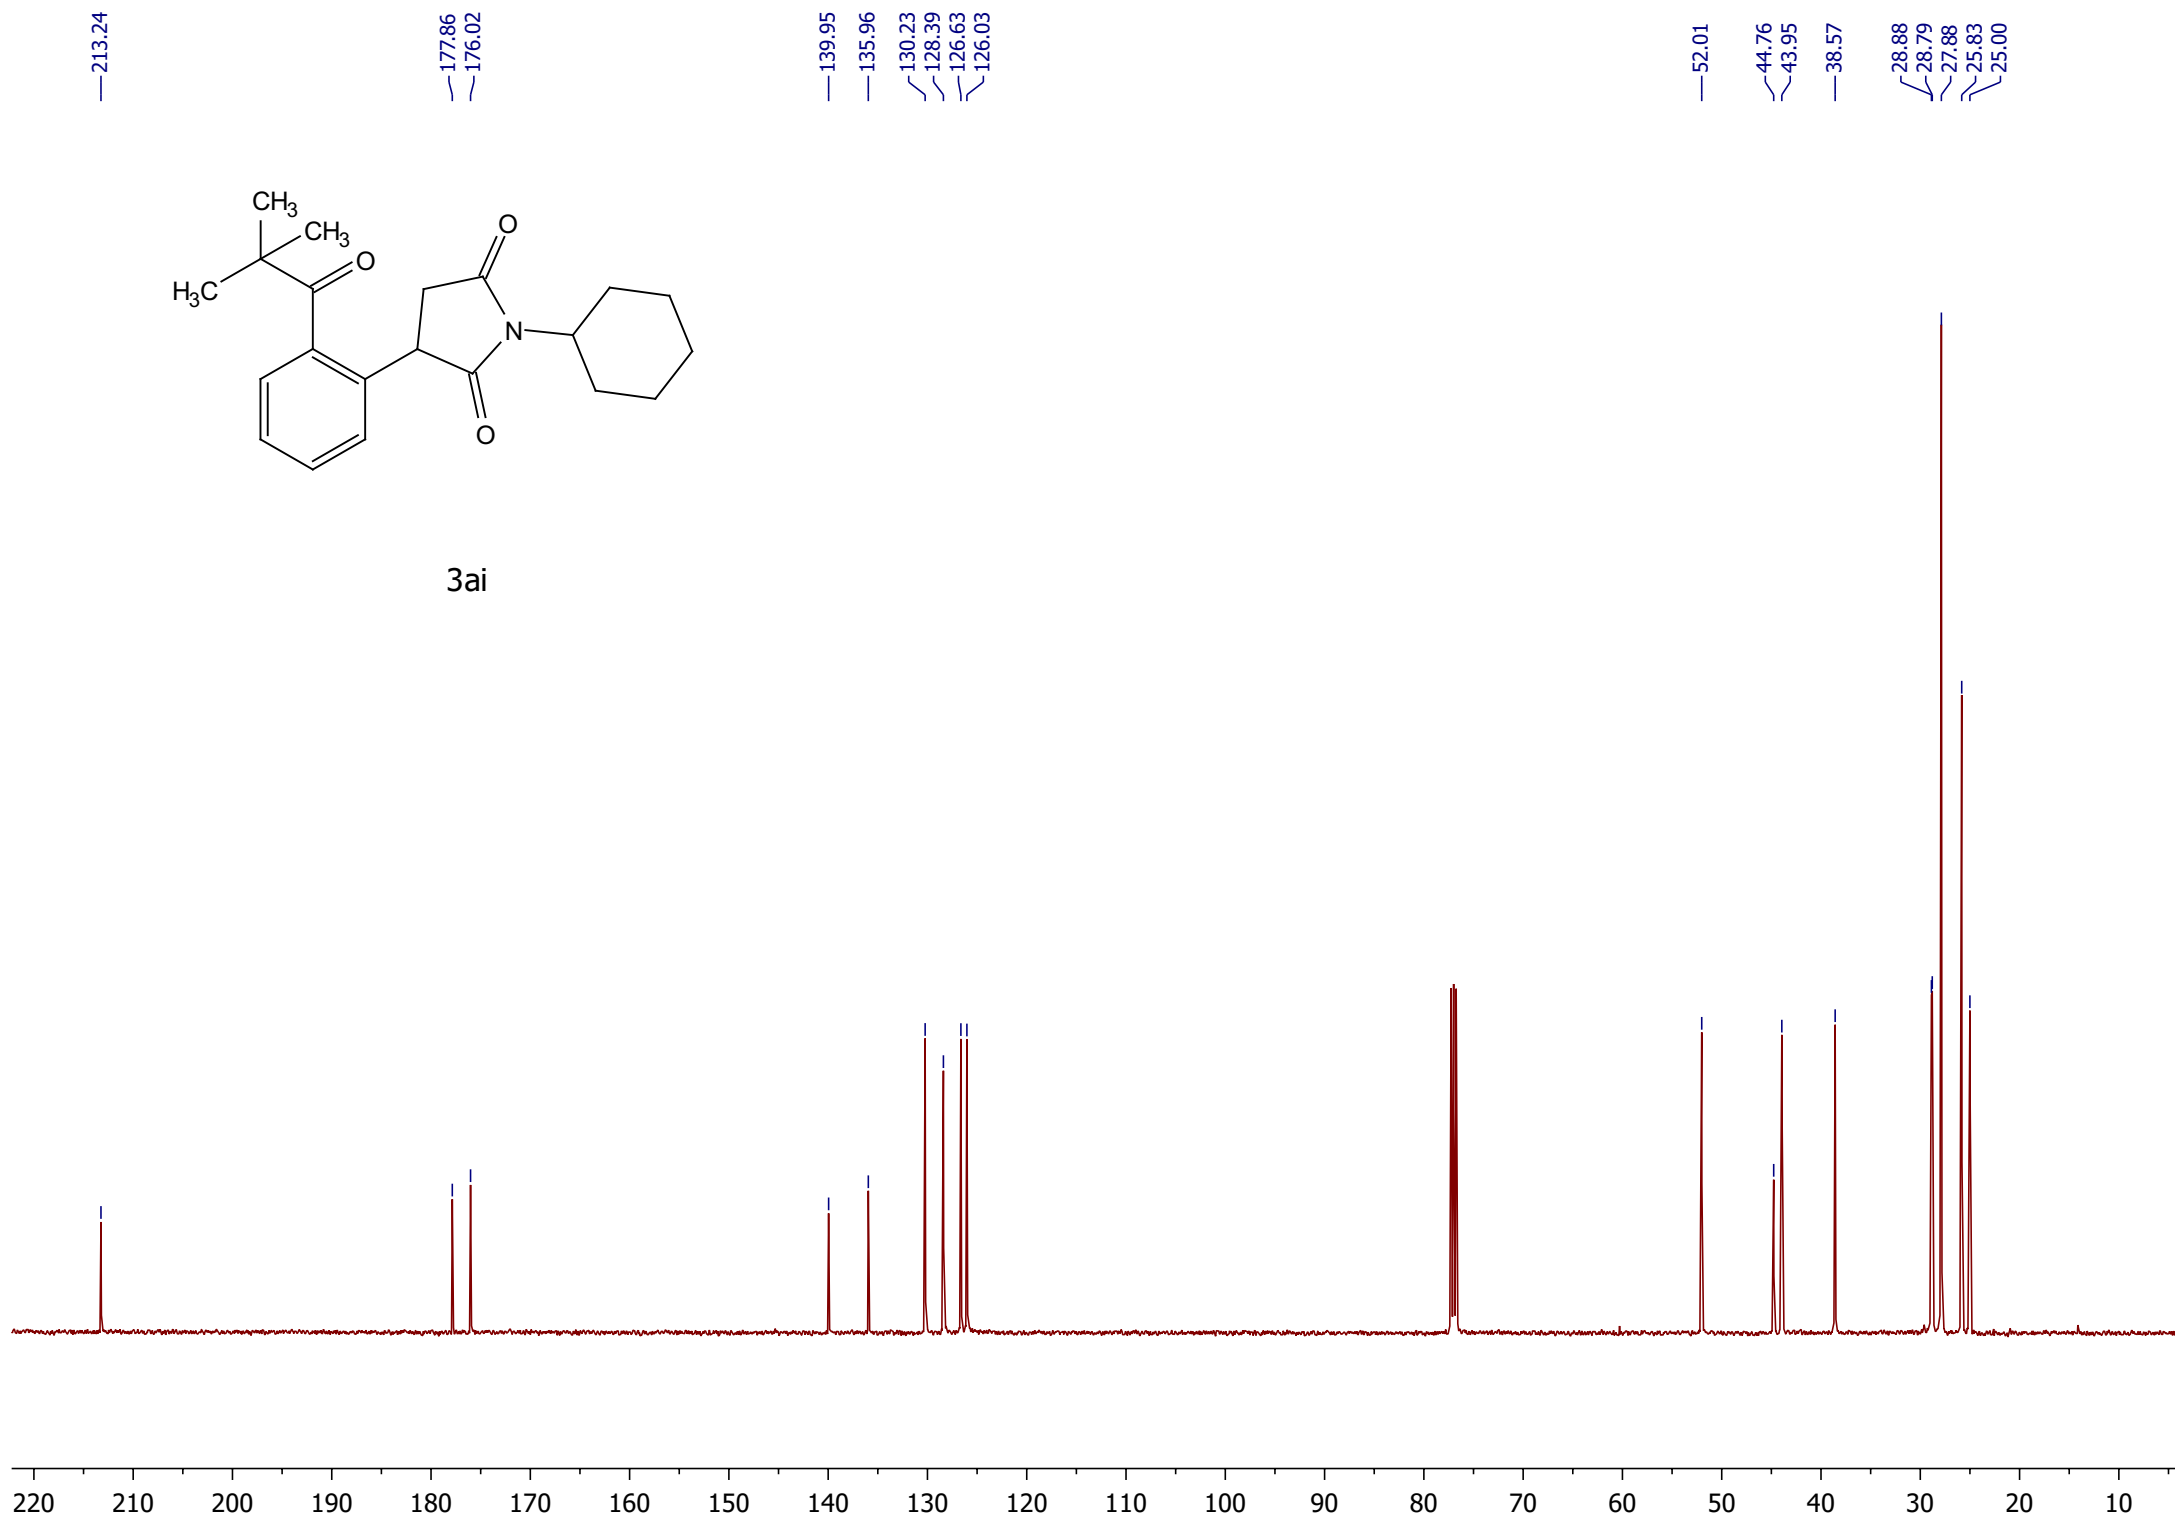

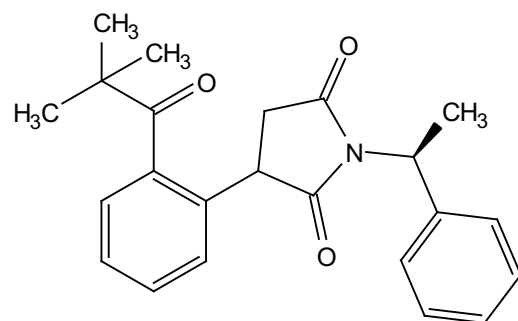

3aj

7.50  
7.49  
7.45  
7.43  
7.38  
7.34  
7.33  
7.30  
7.28  
7.03  
7.01  
6.97  
6.95

5.52  
5.51  
5.49  
5.48  
5.46  
5.45

3.86  
3.85  
3.84  
3.83  
3.82  
3.81  
3.14  
3.12  
3.10  
3.09  
3.08  
3.06  
3.04

2.73  
2.70  
2.69  
2.68  
2.66  
2.65

1.90  
1.89  
1.88  
1.86

1.31  
1.31

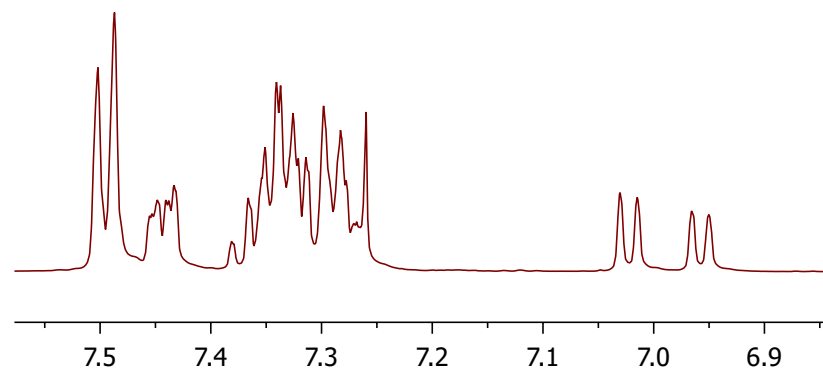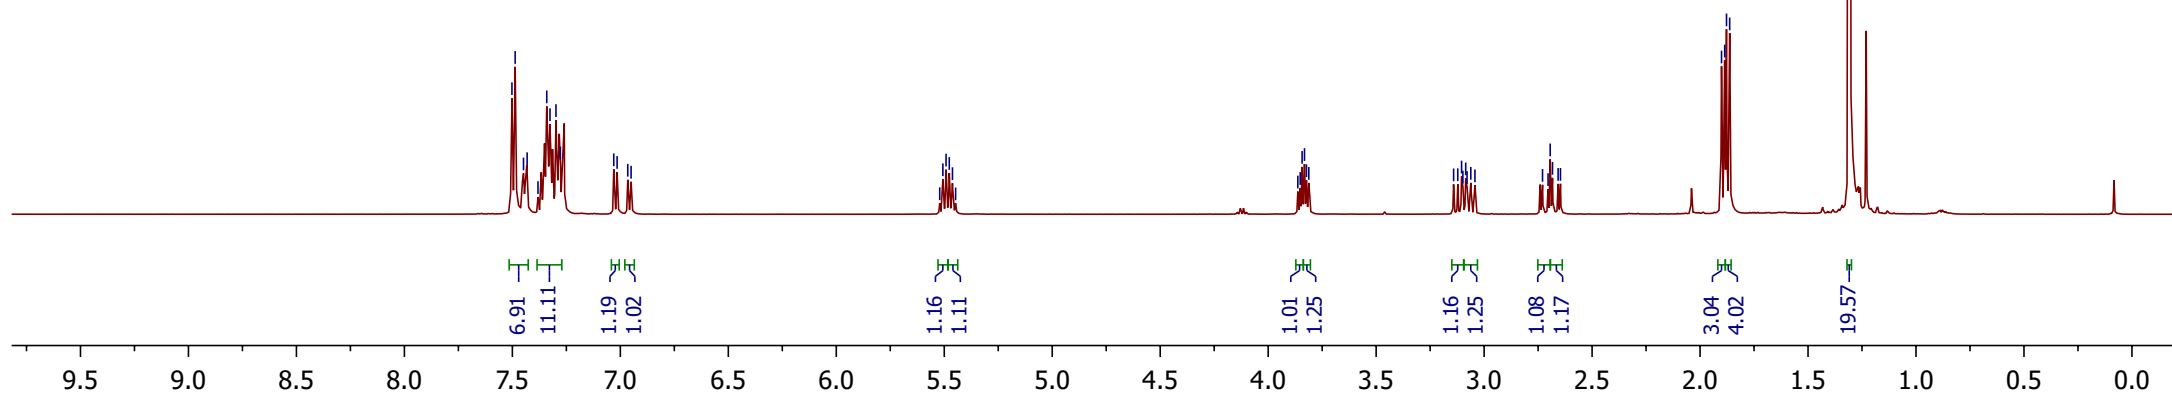

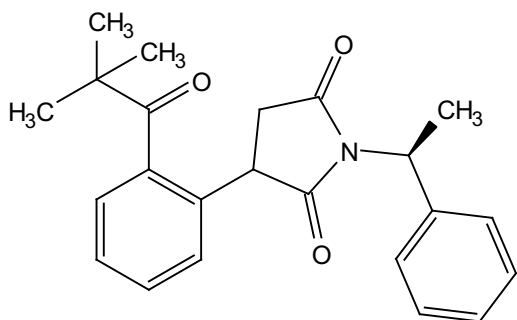

3aj

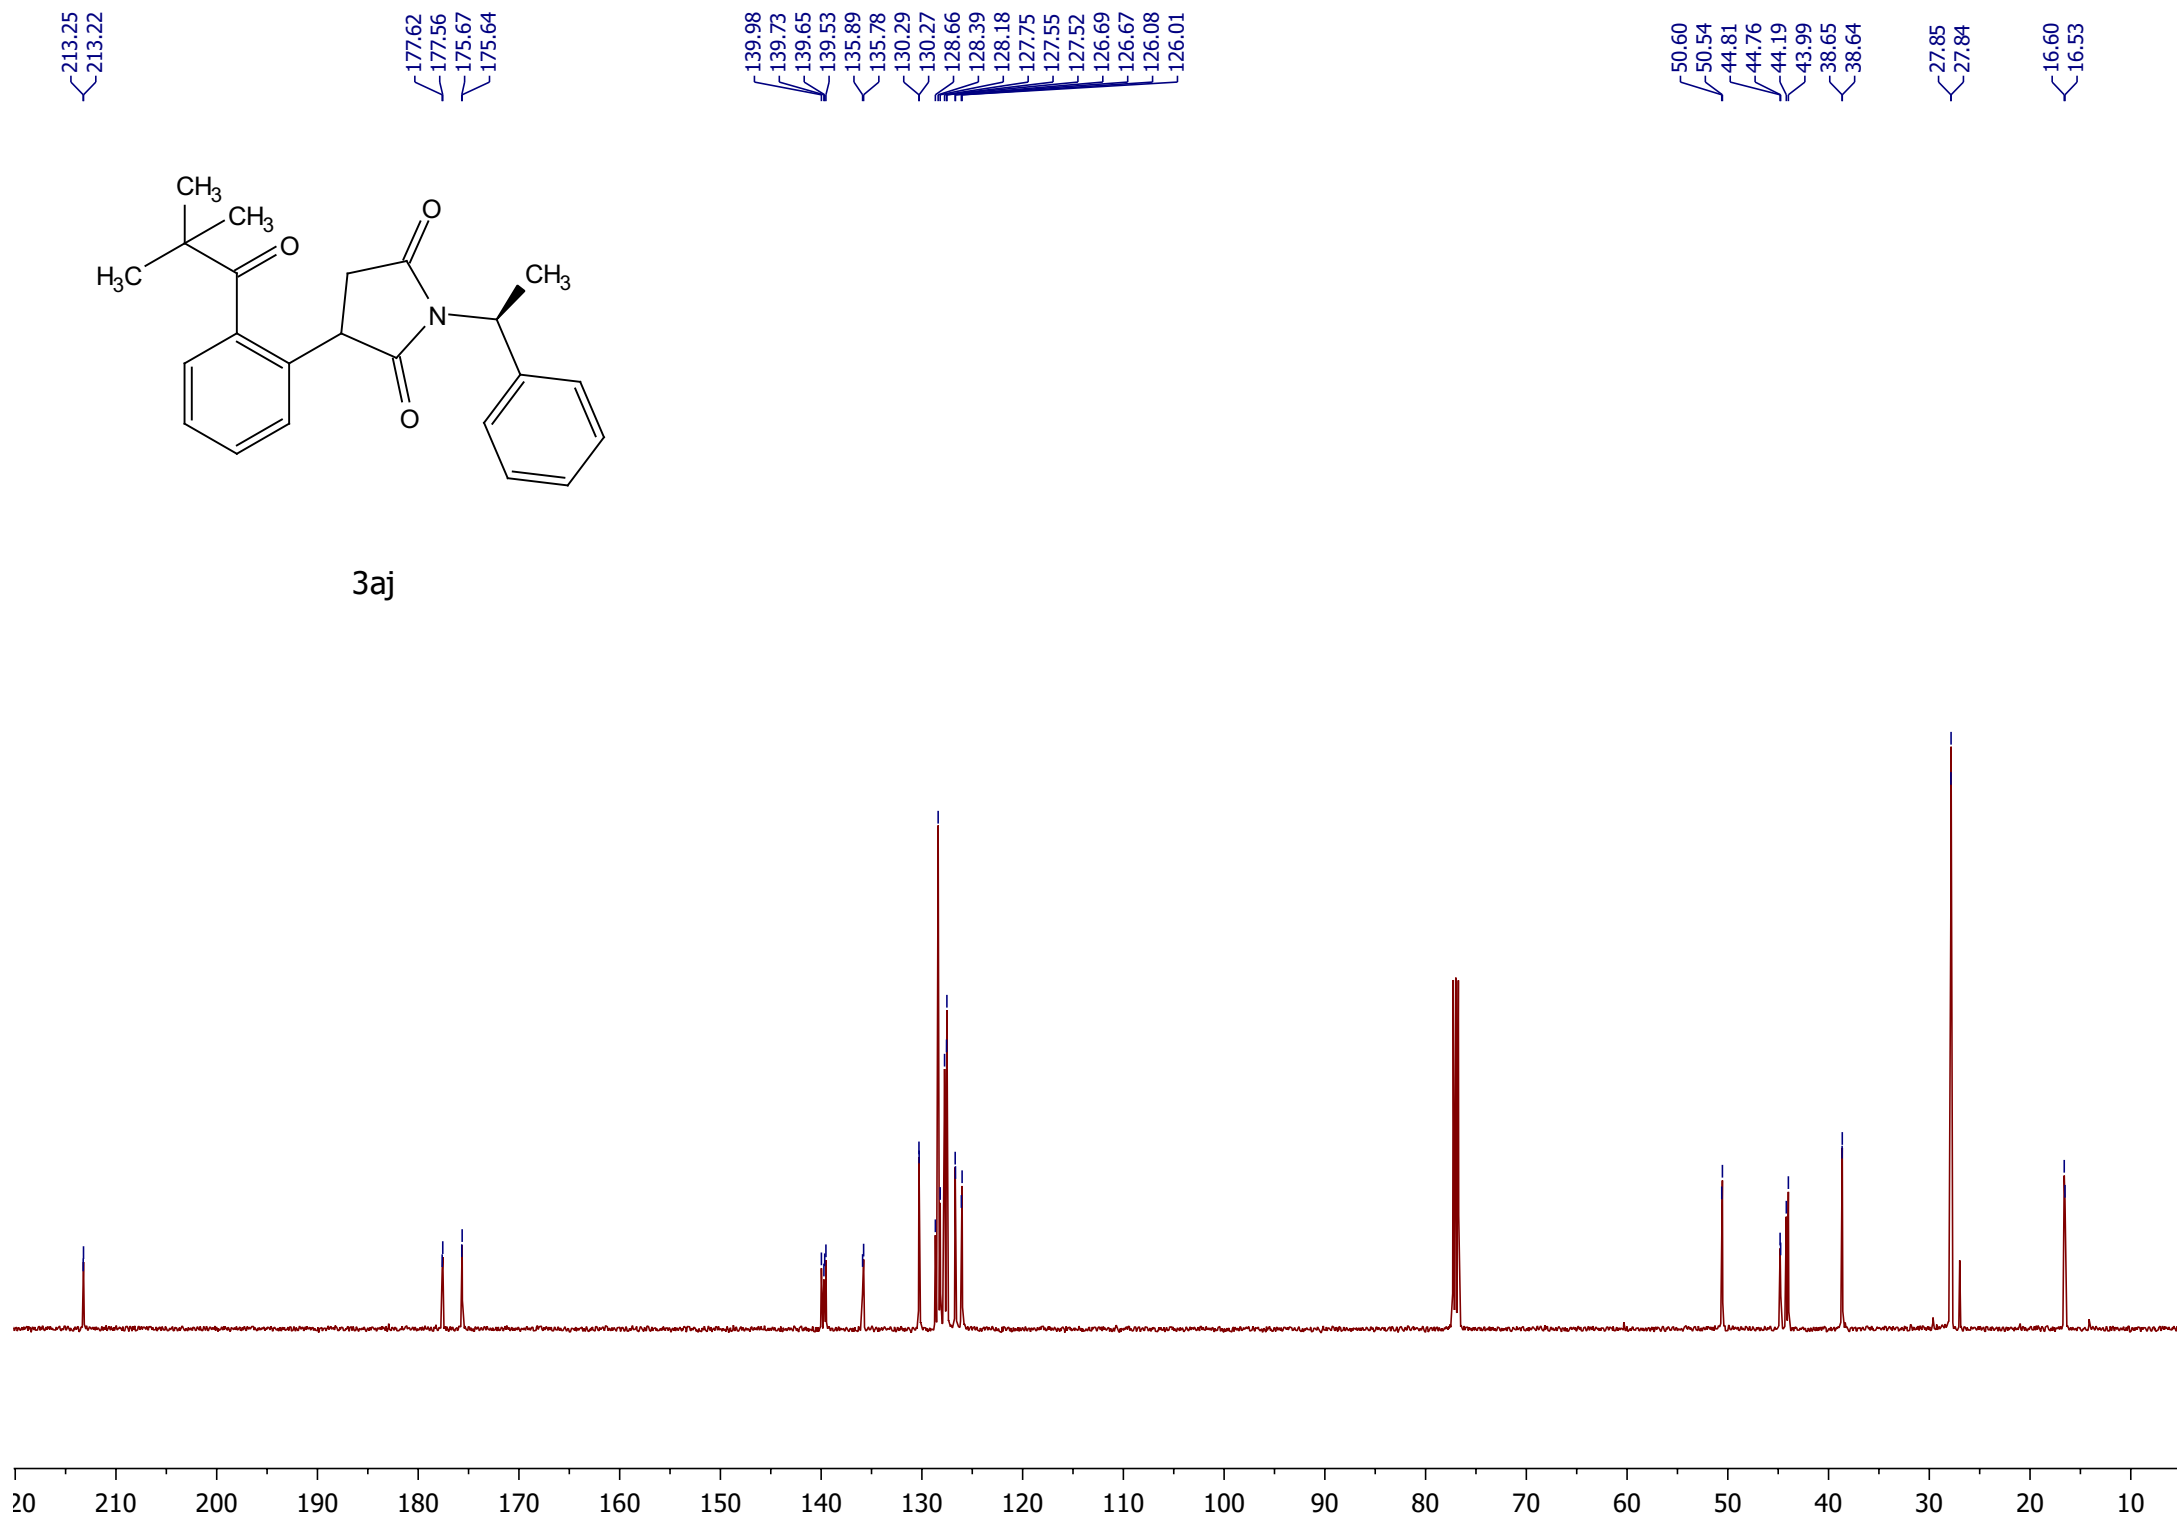

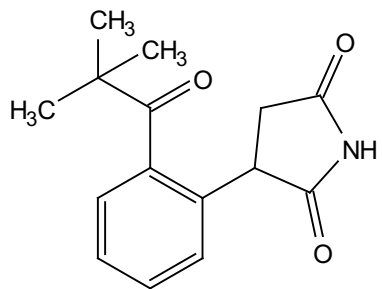

3ak

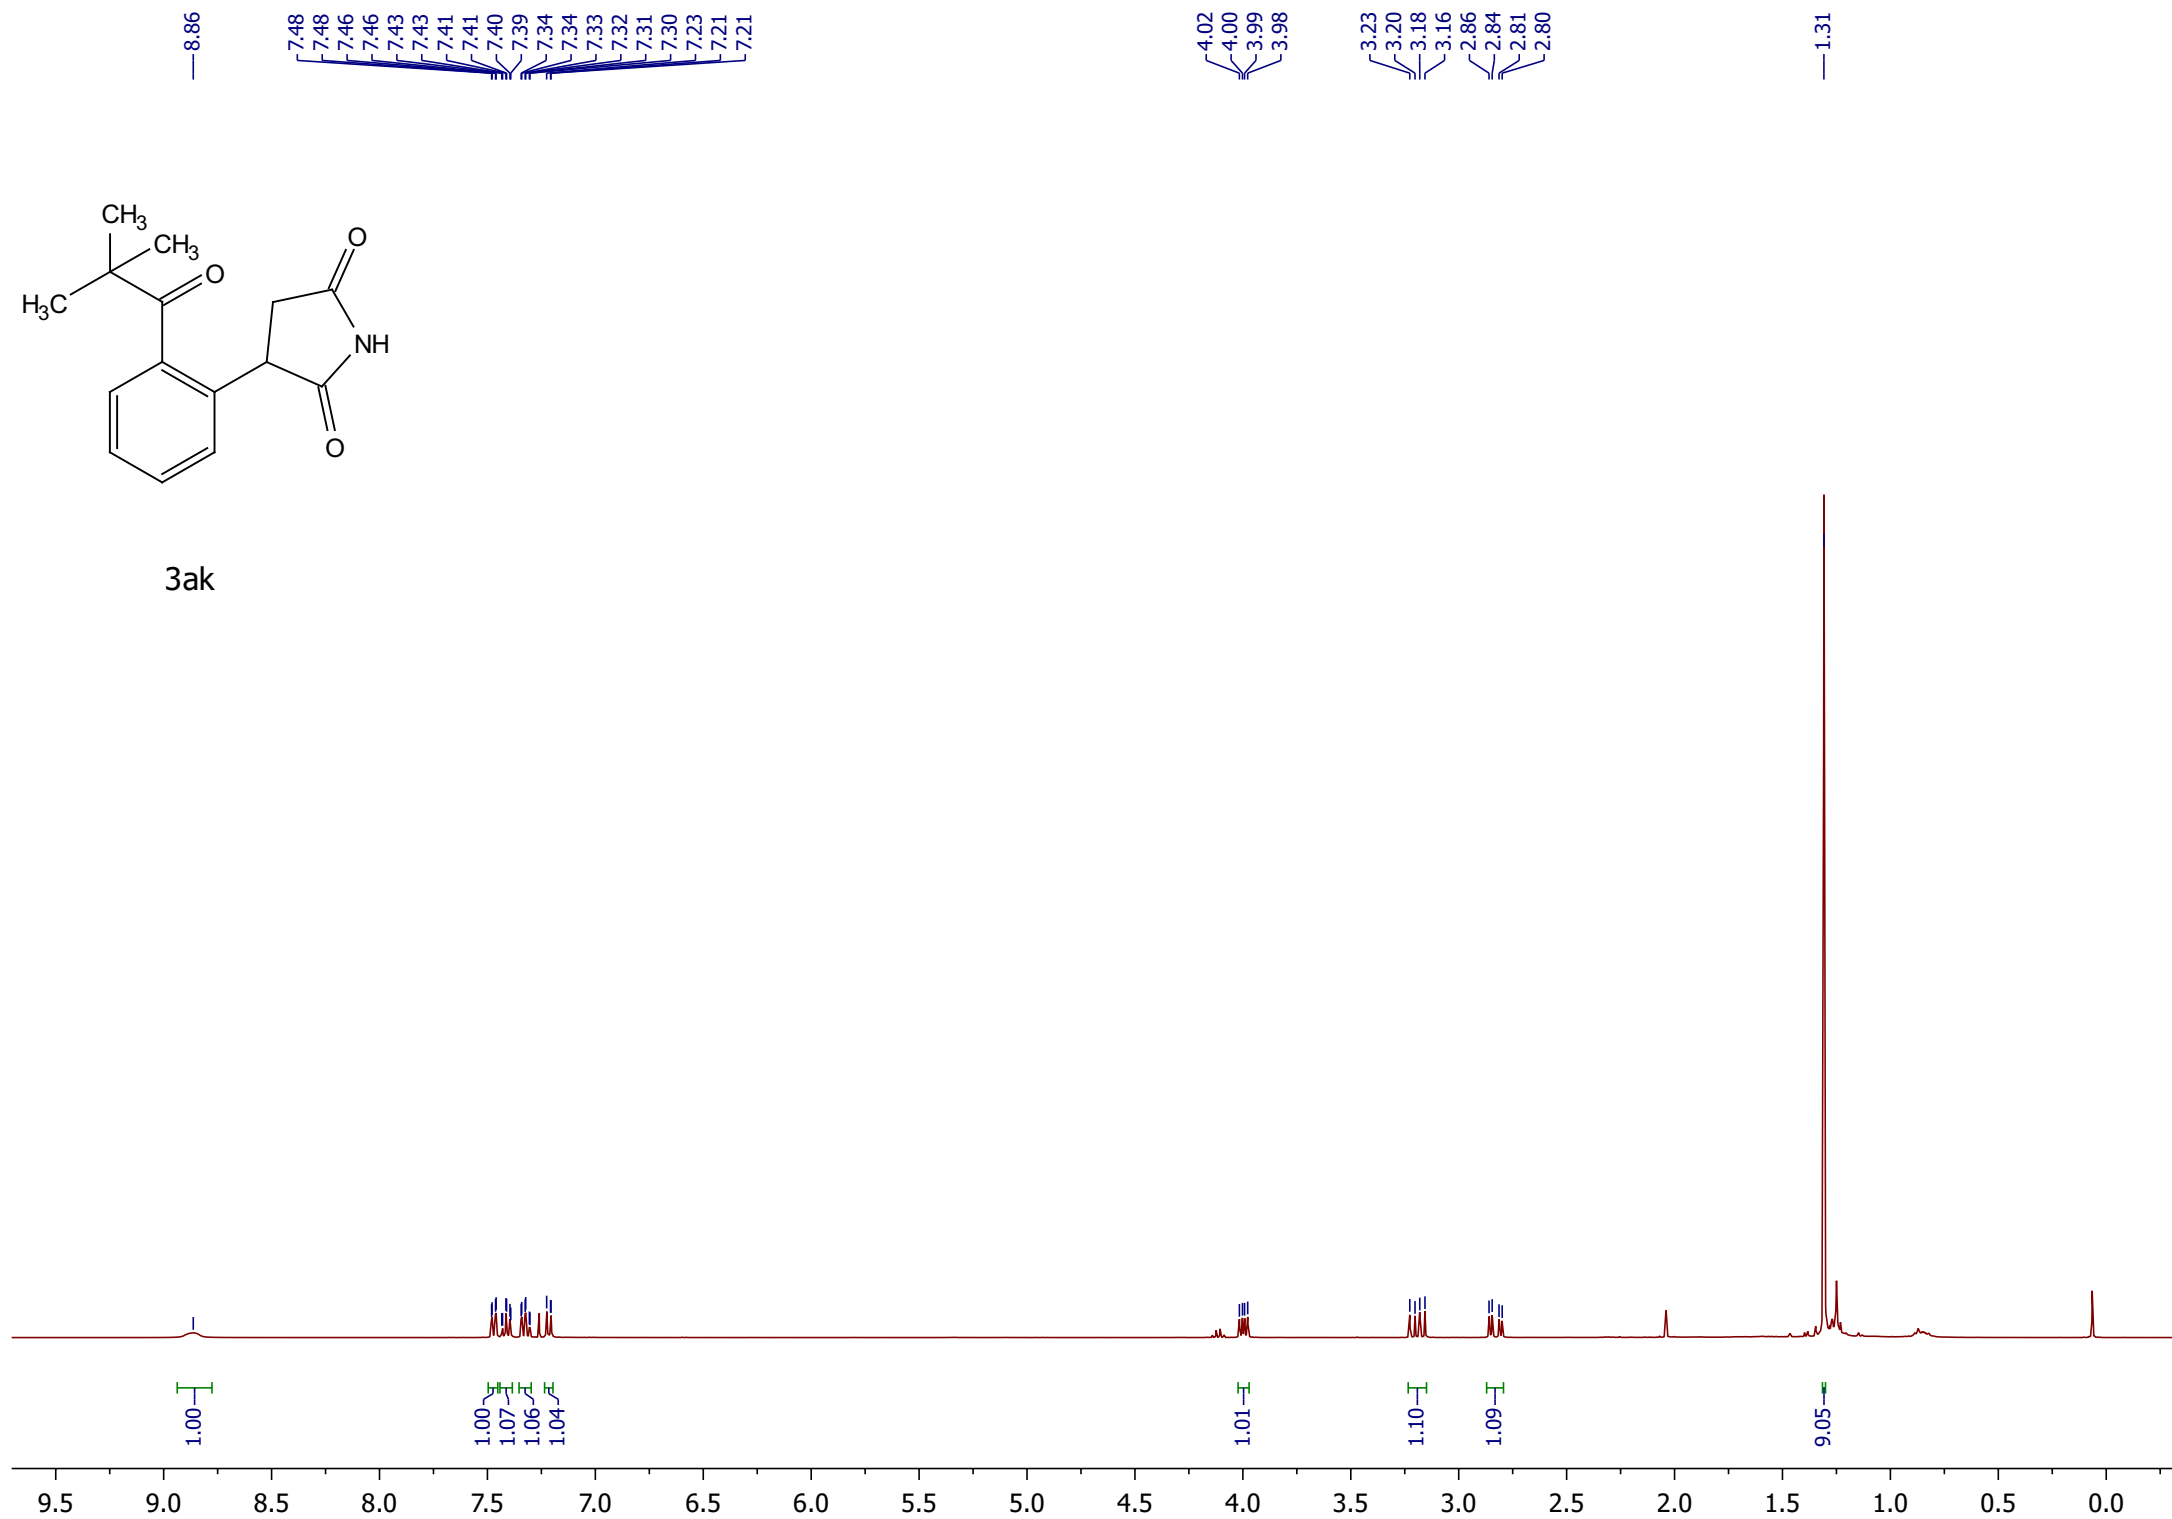

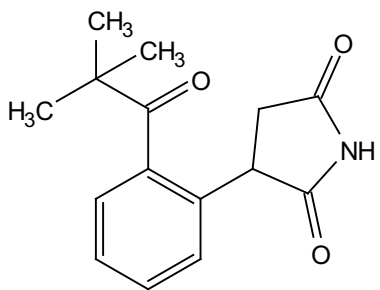

3ak

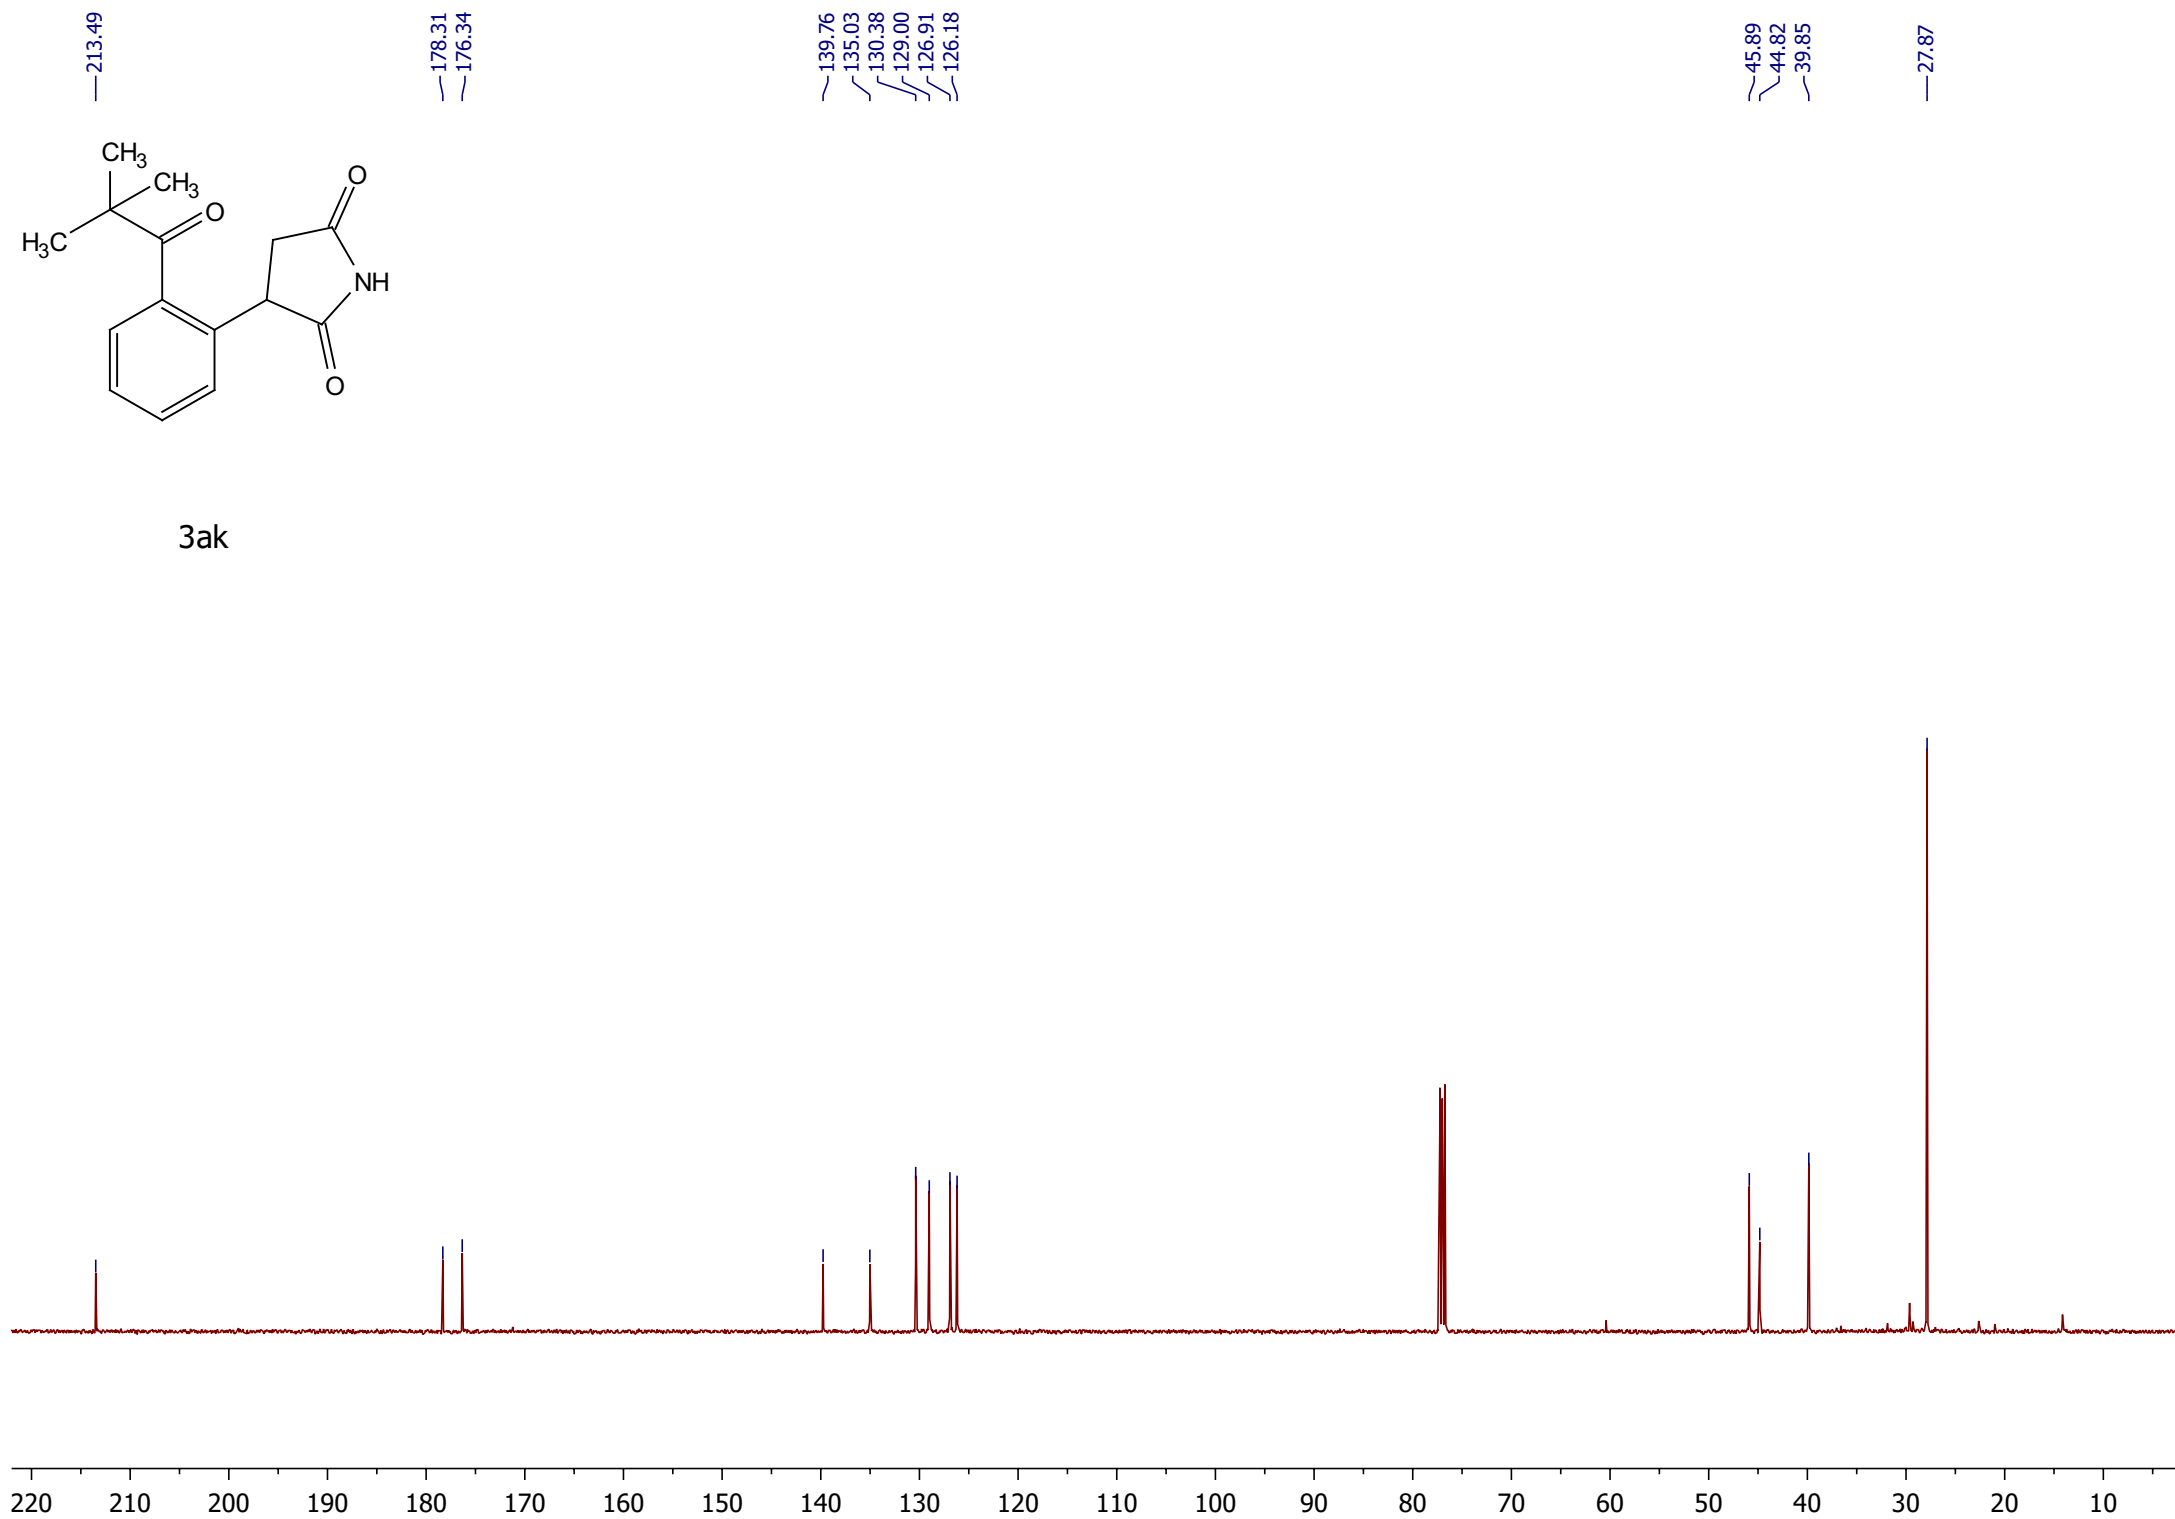

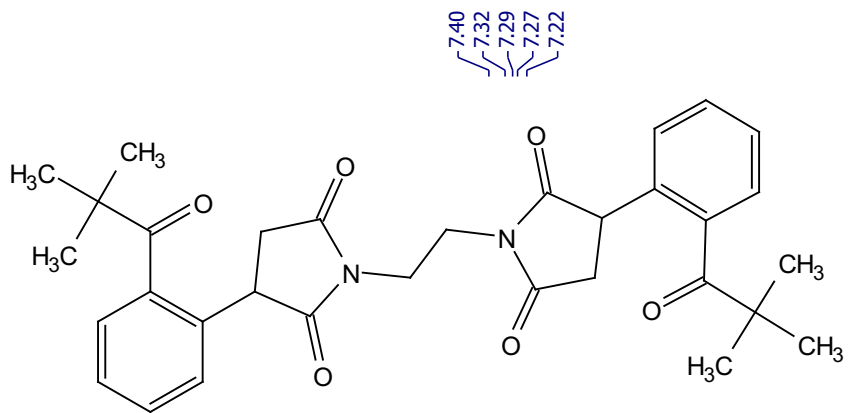

3aI

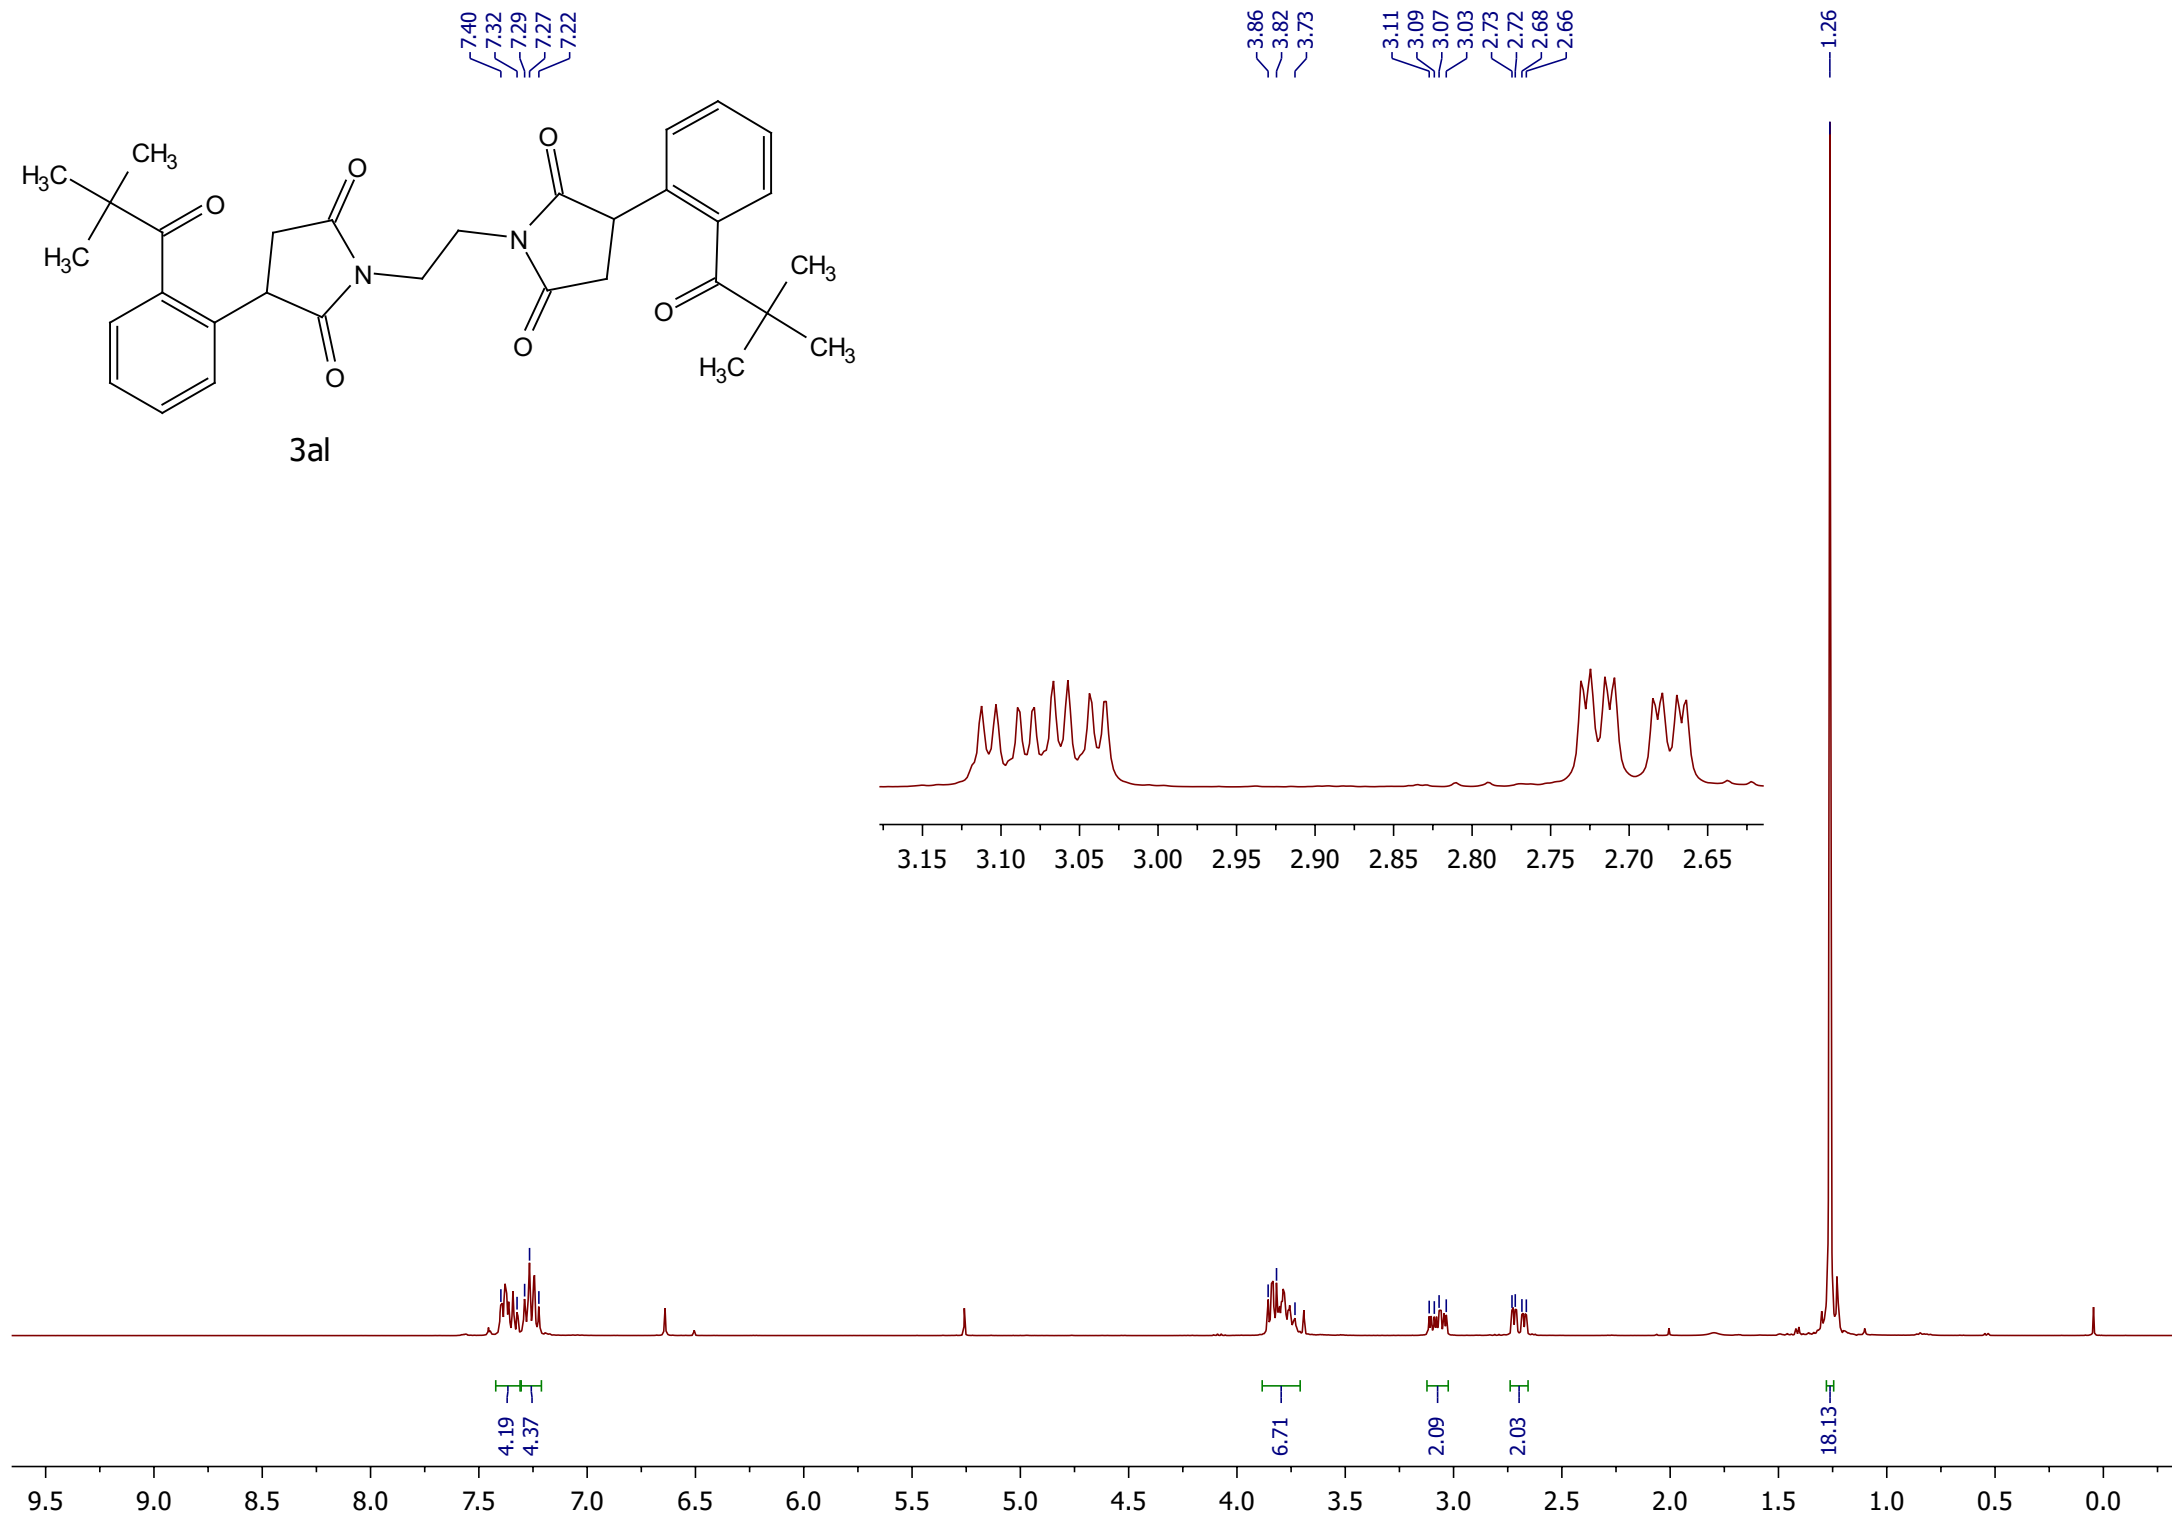

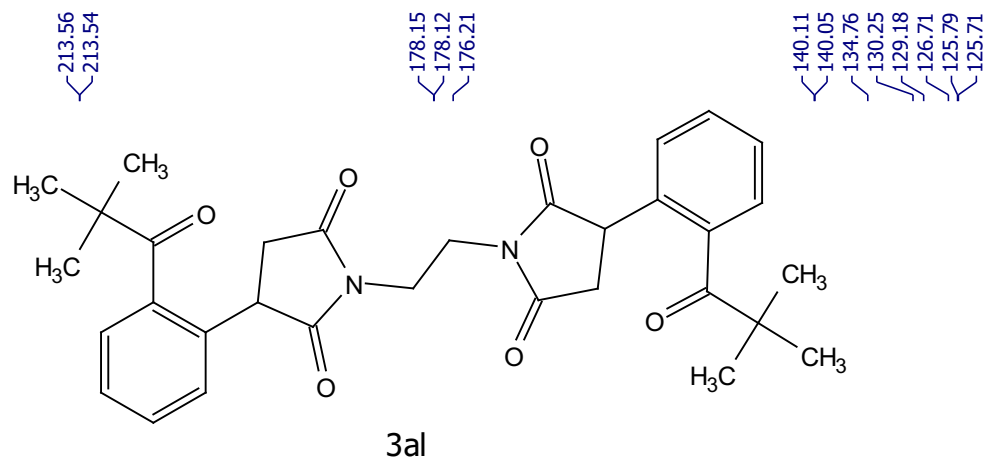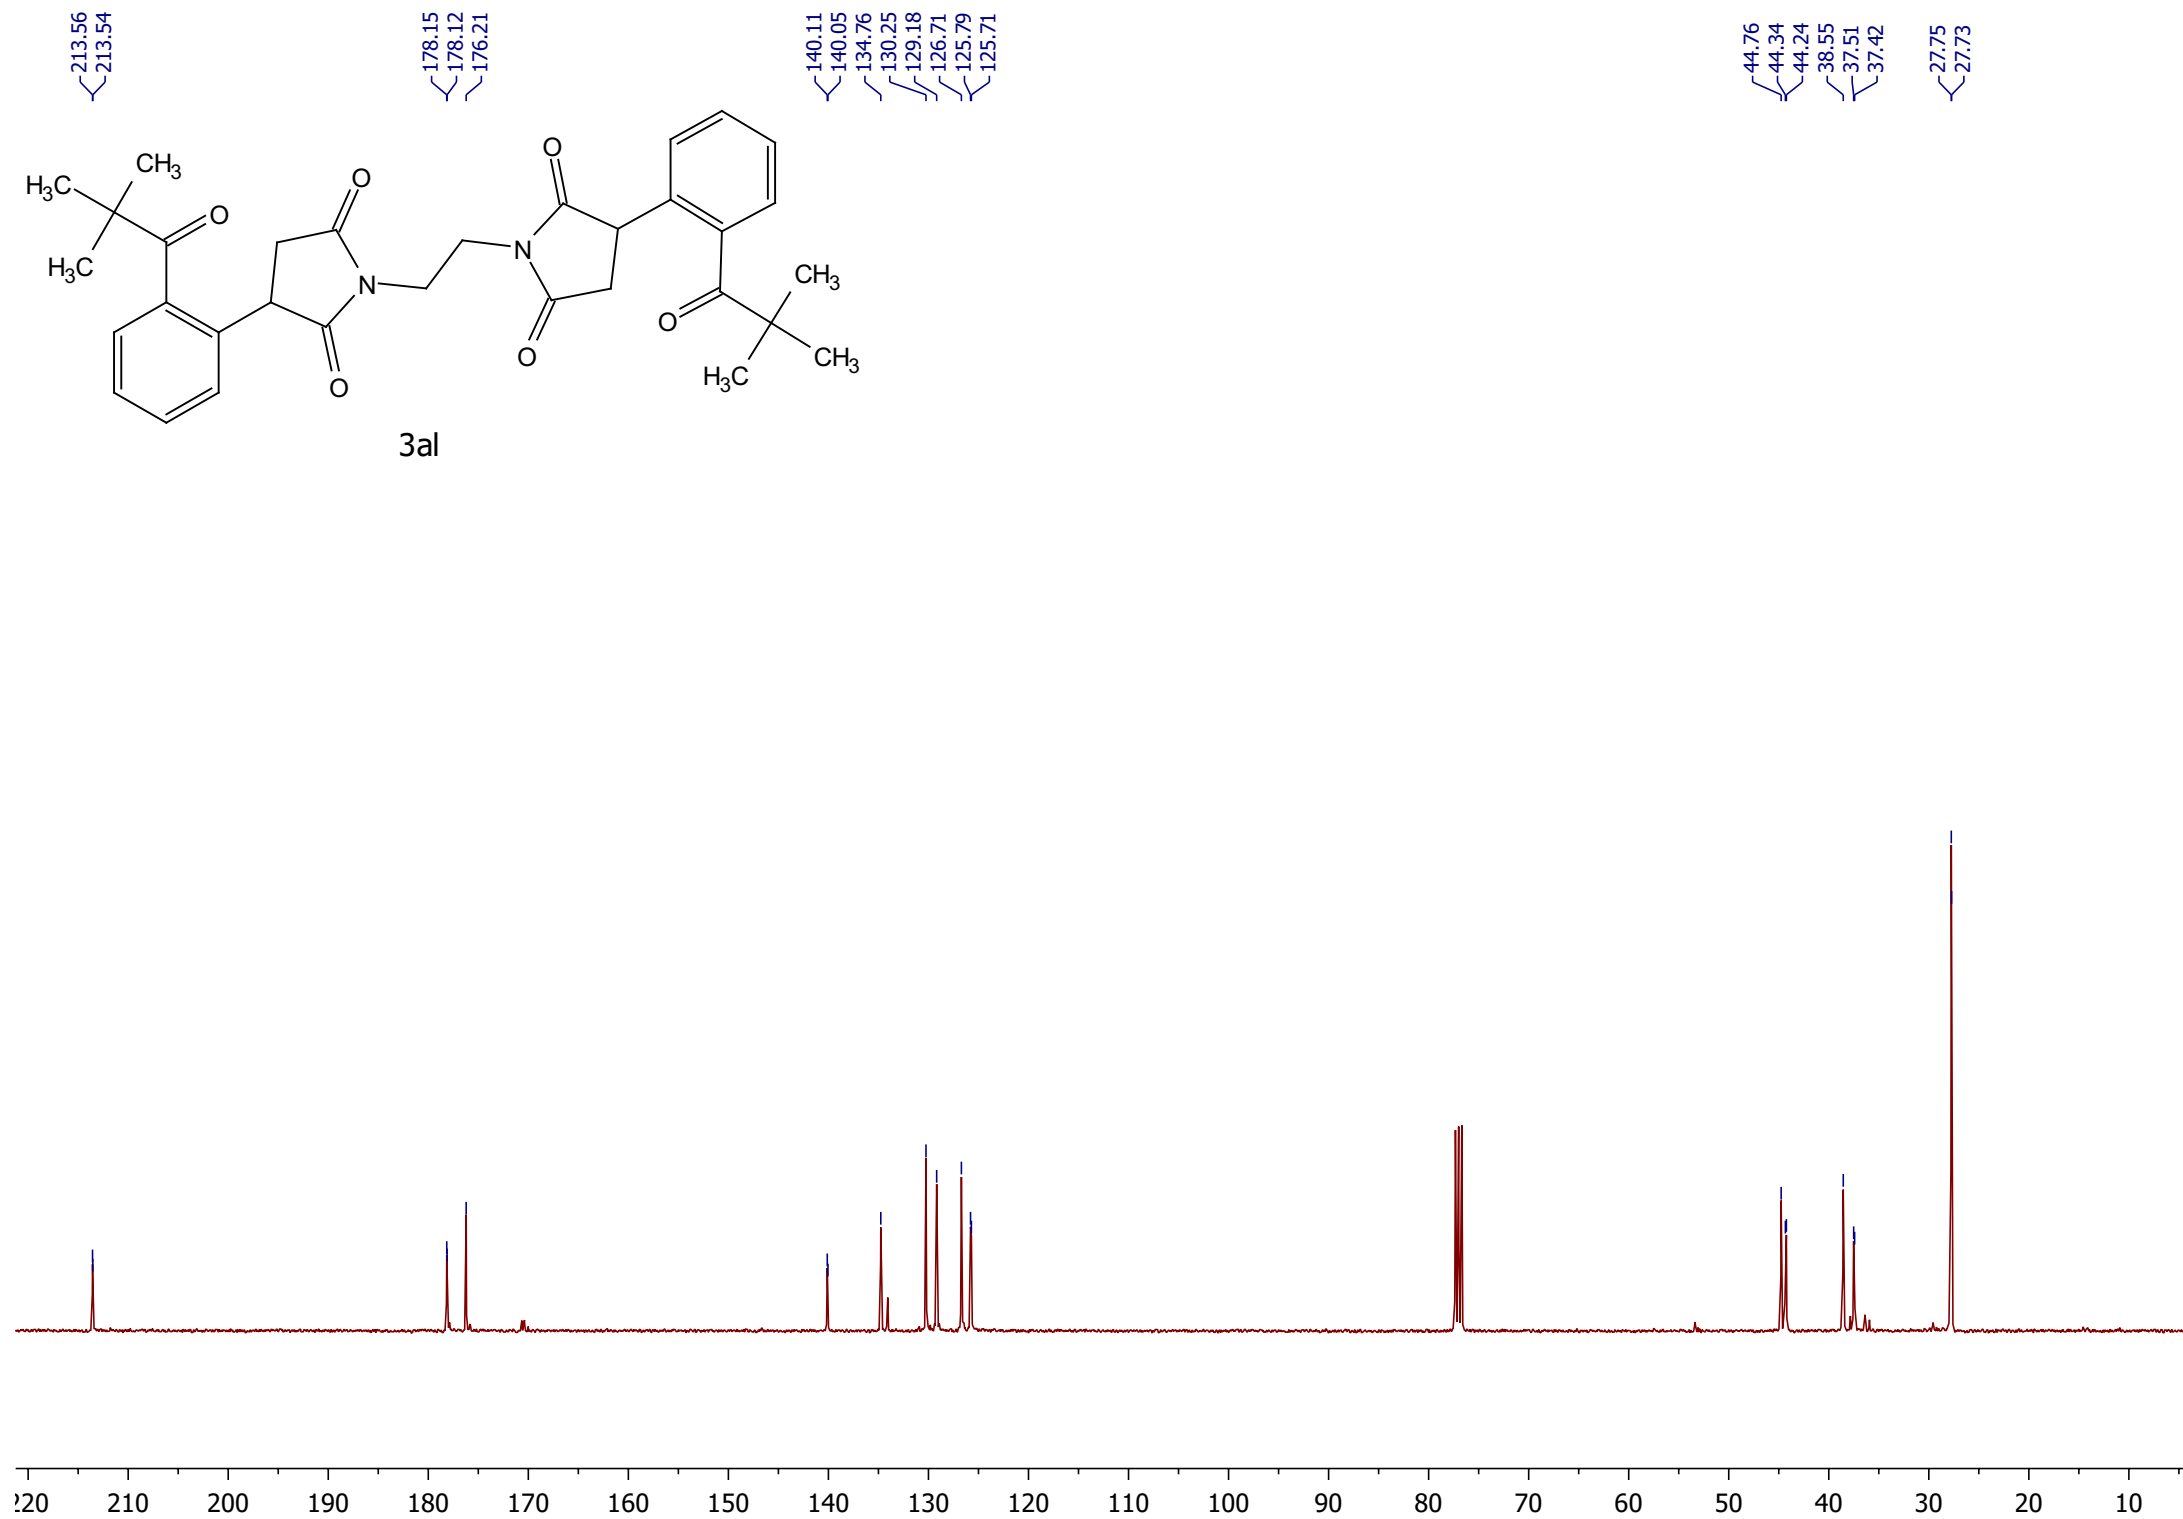

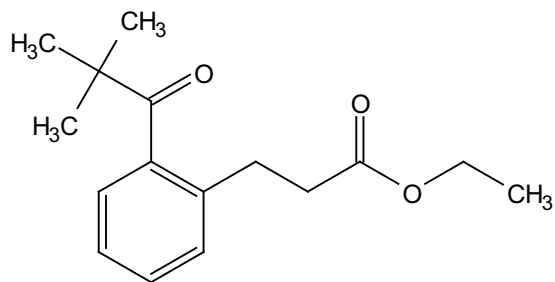

3am

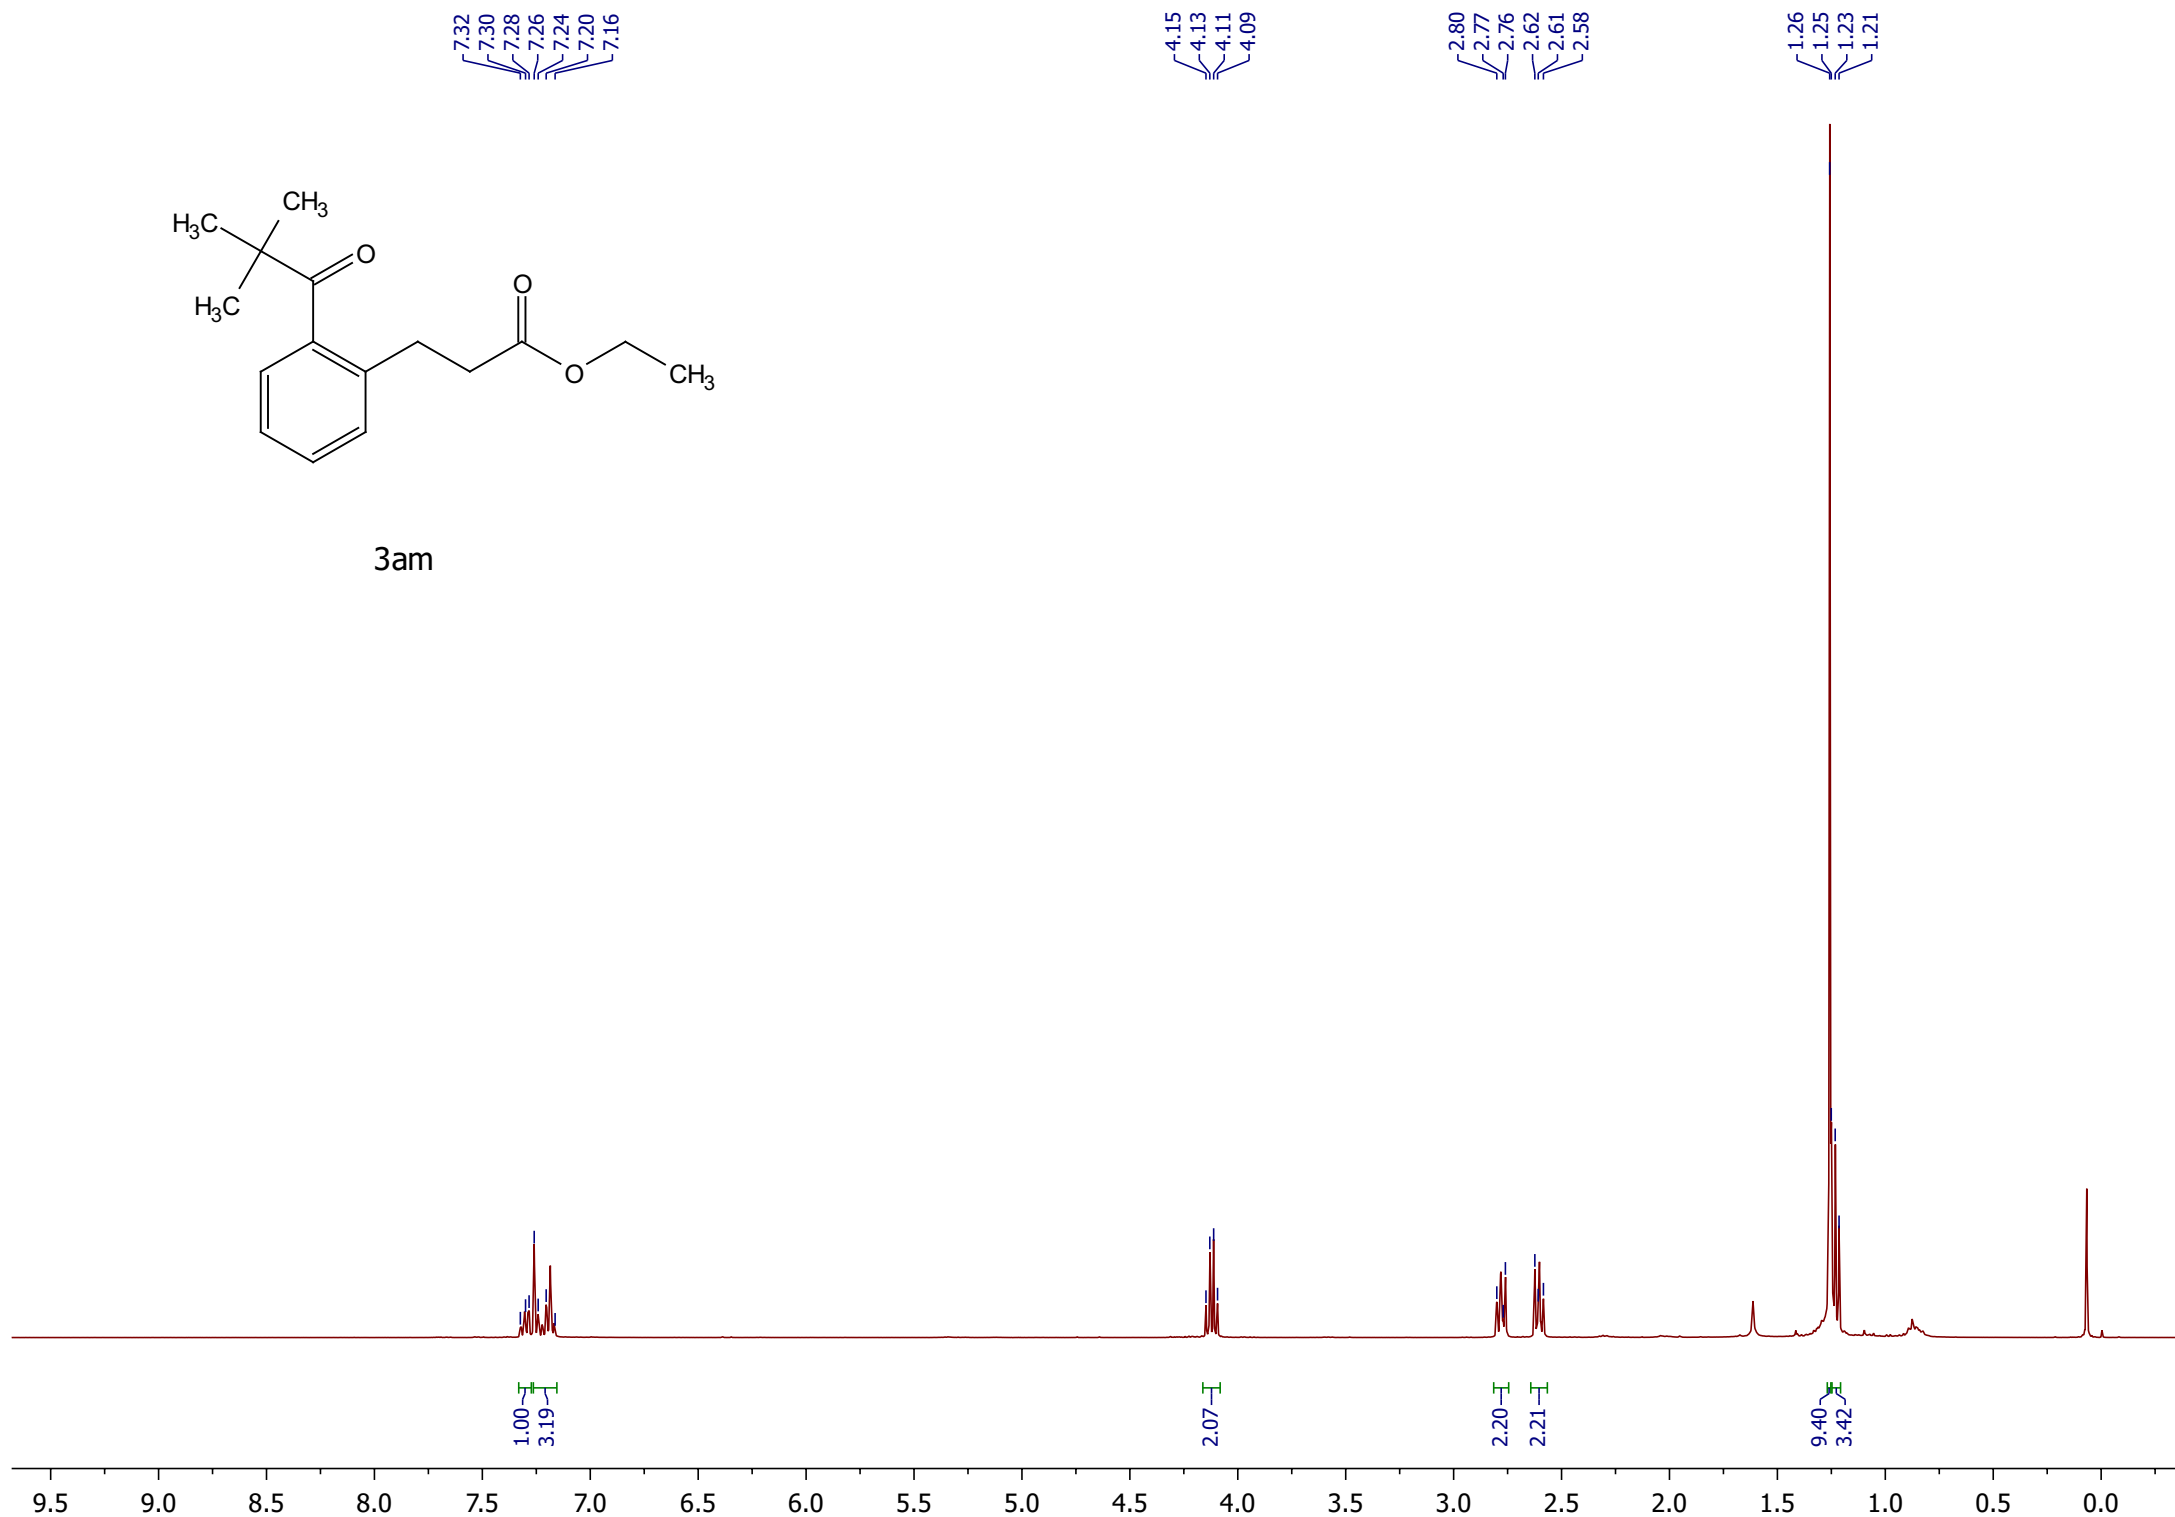



3am

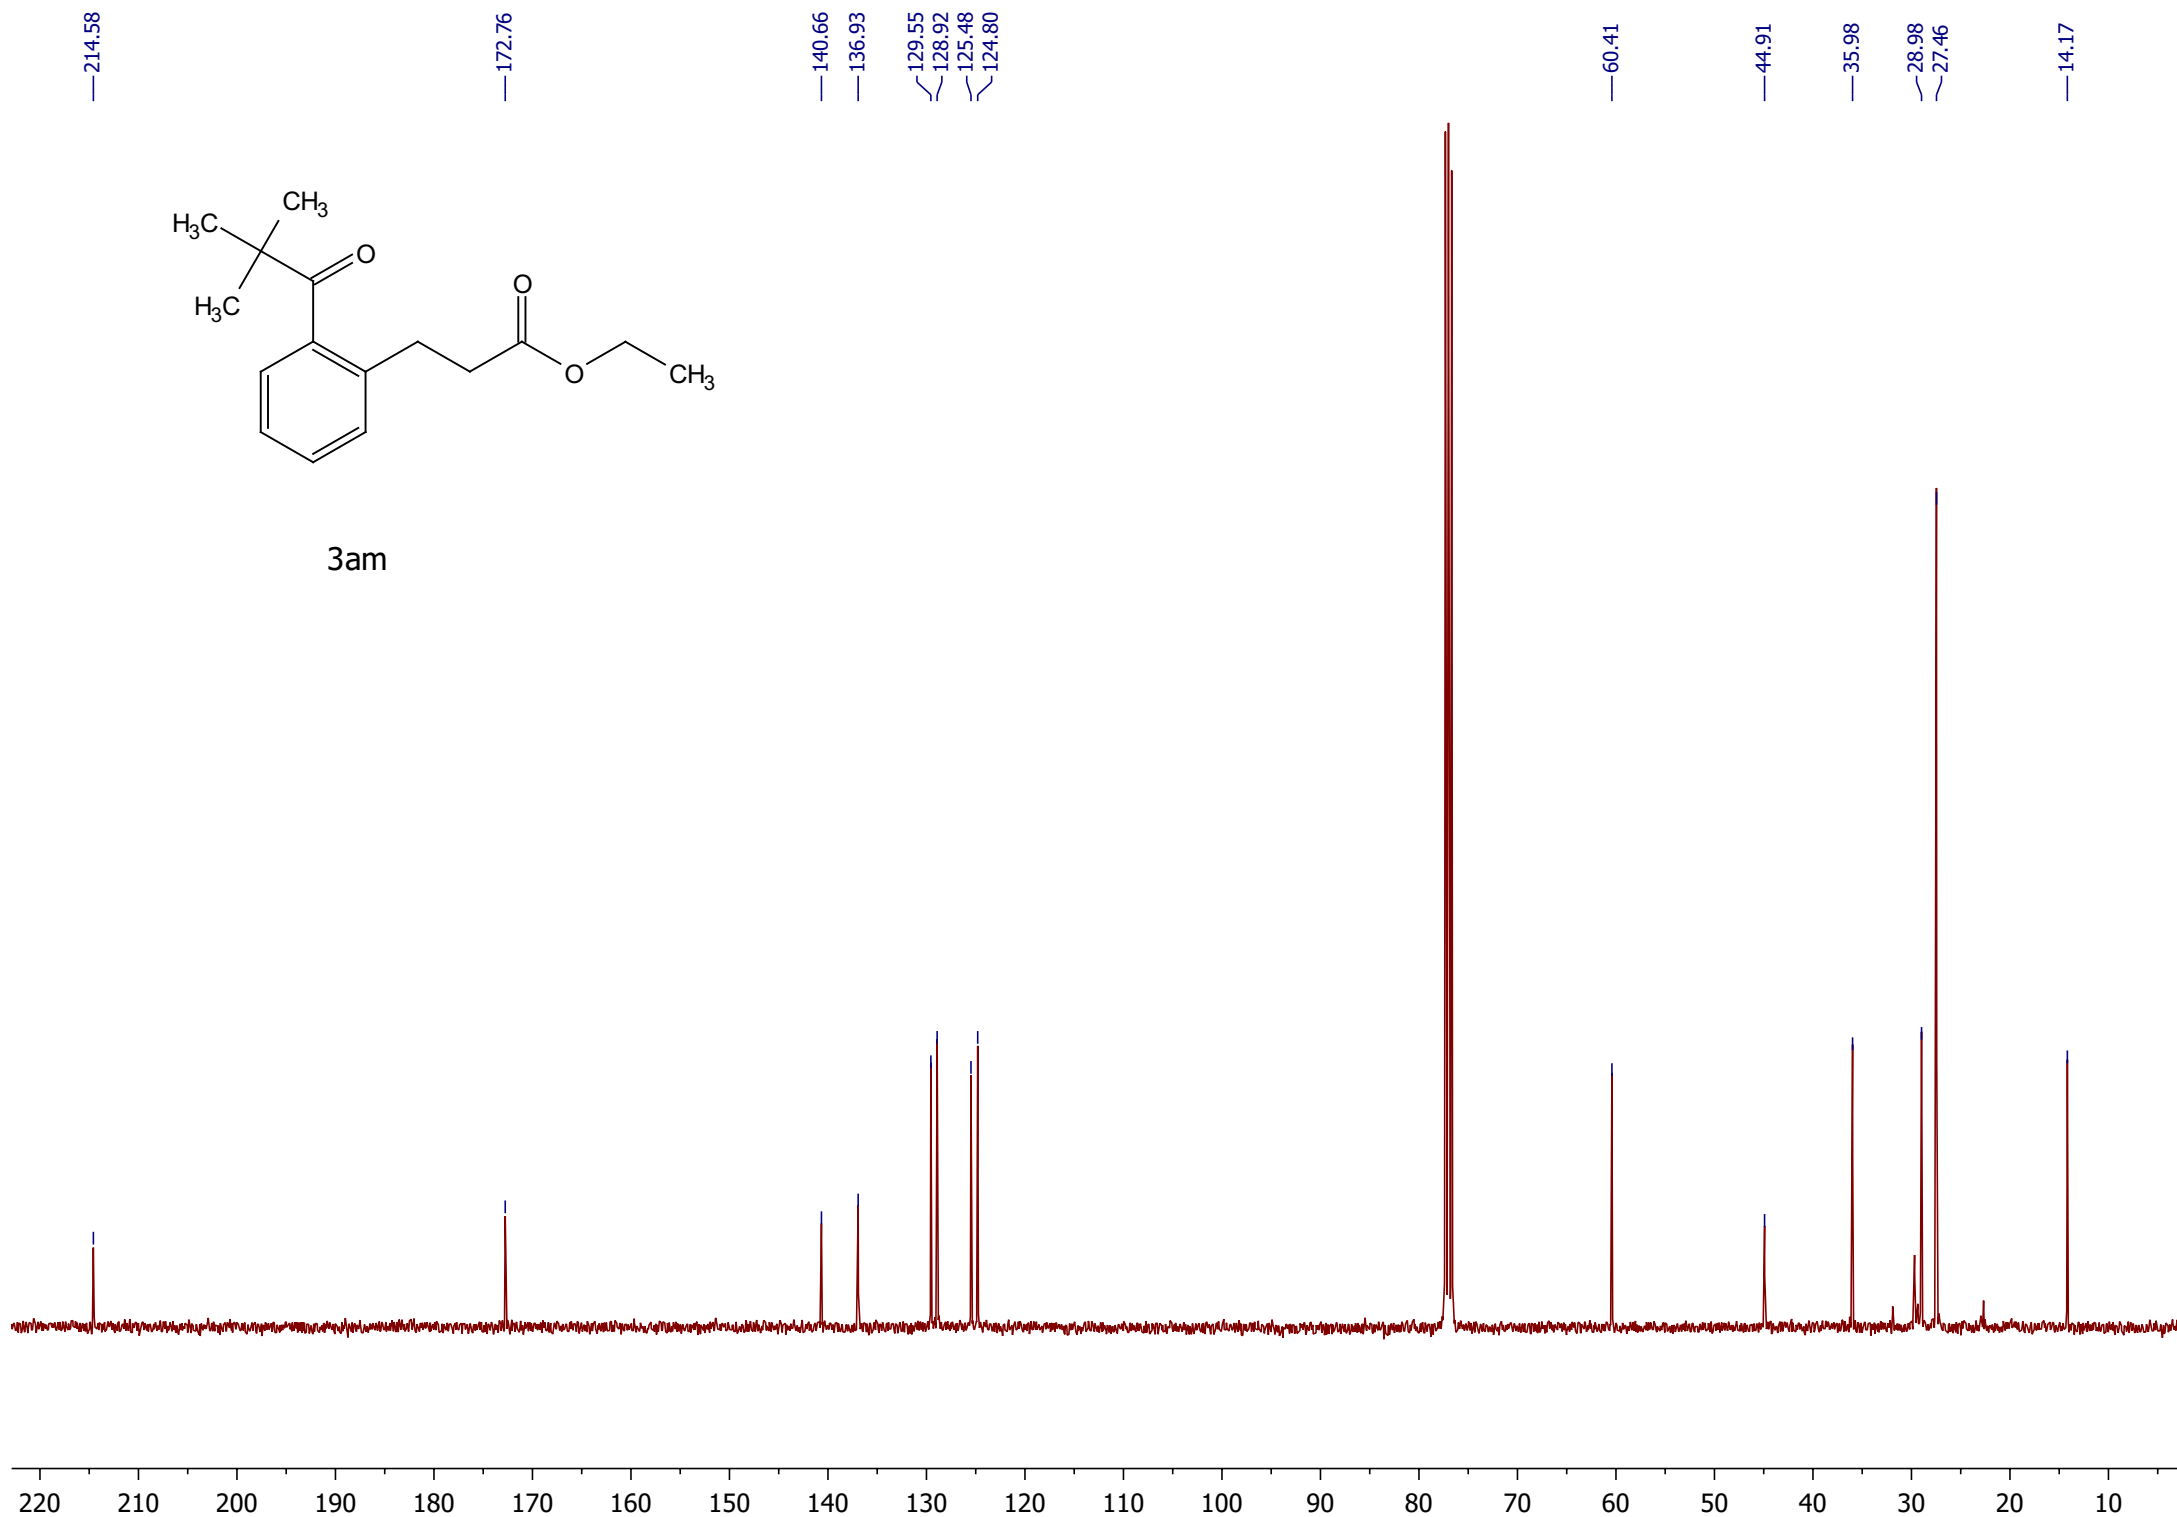

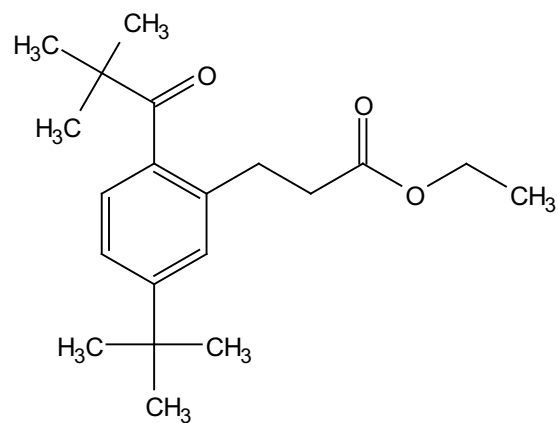

3an

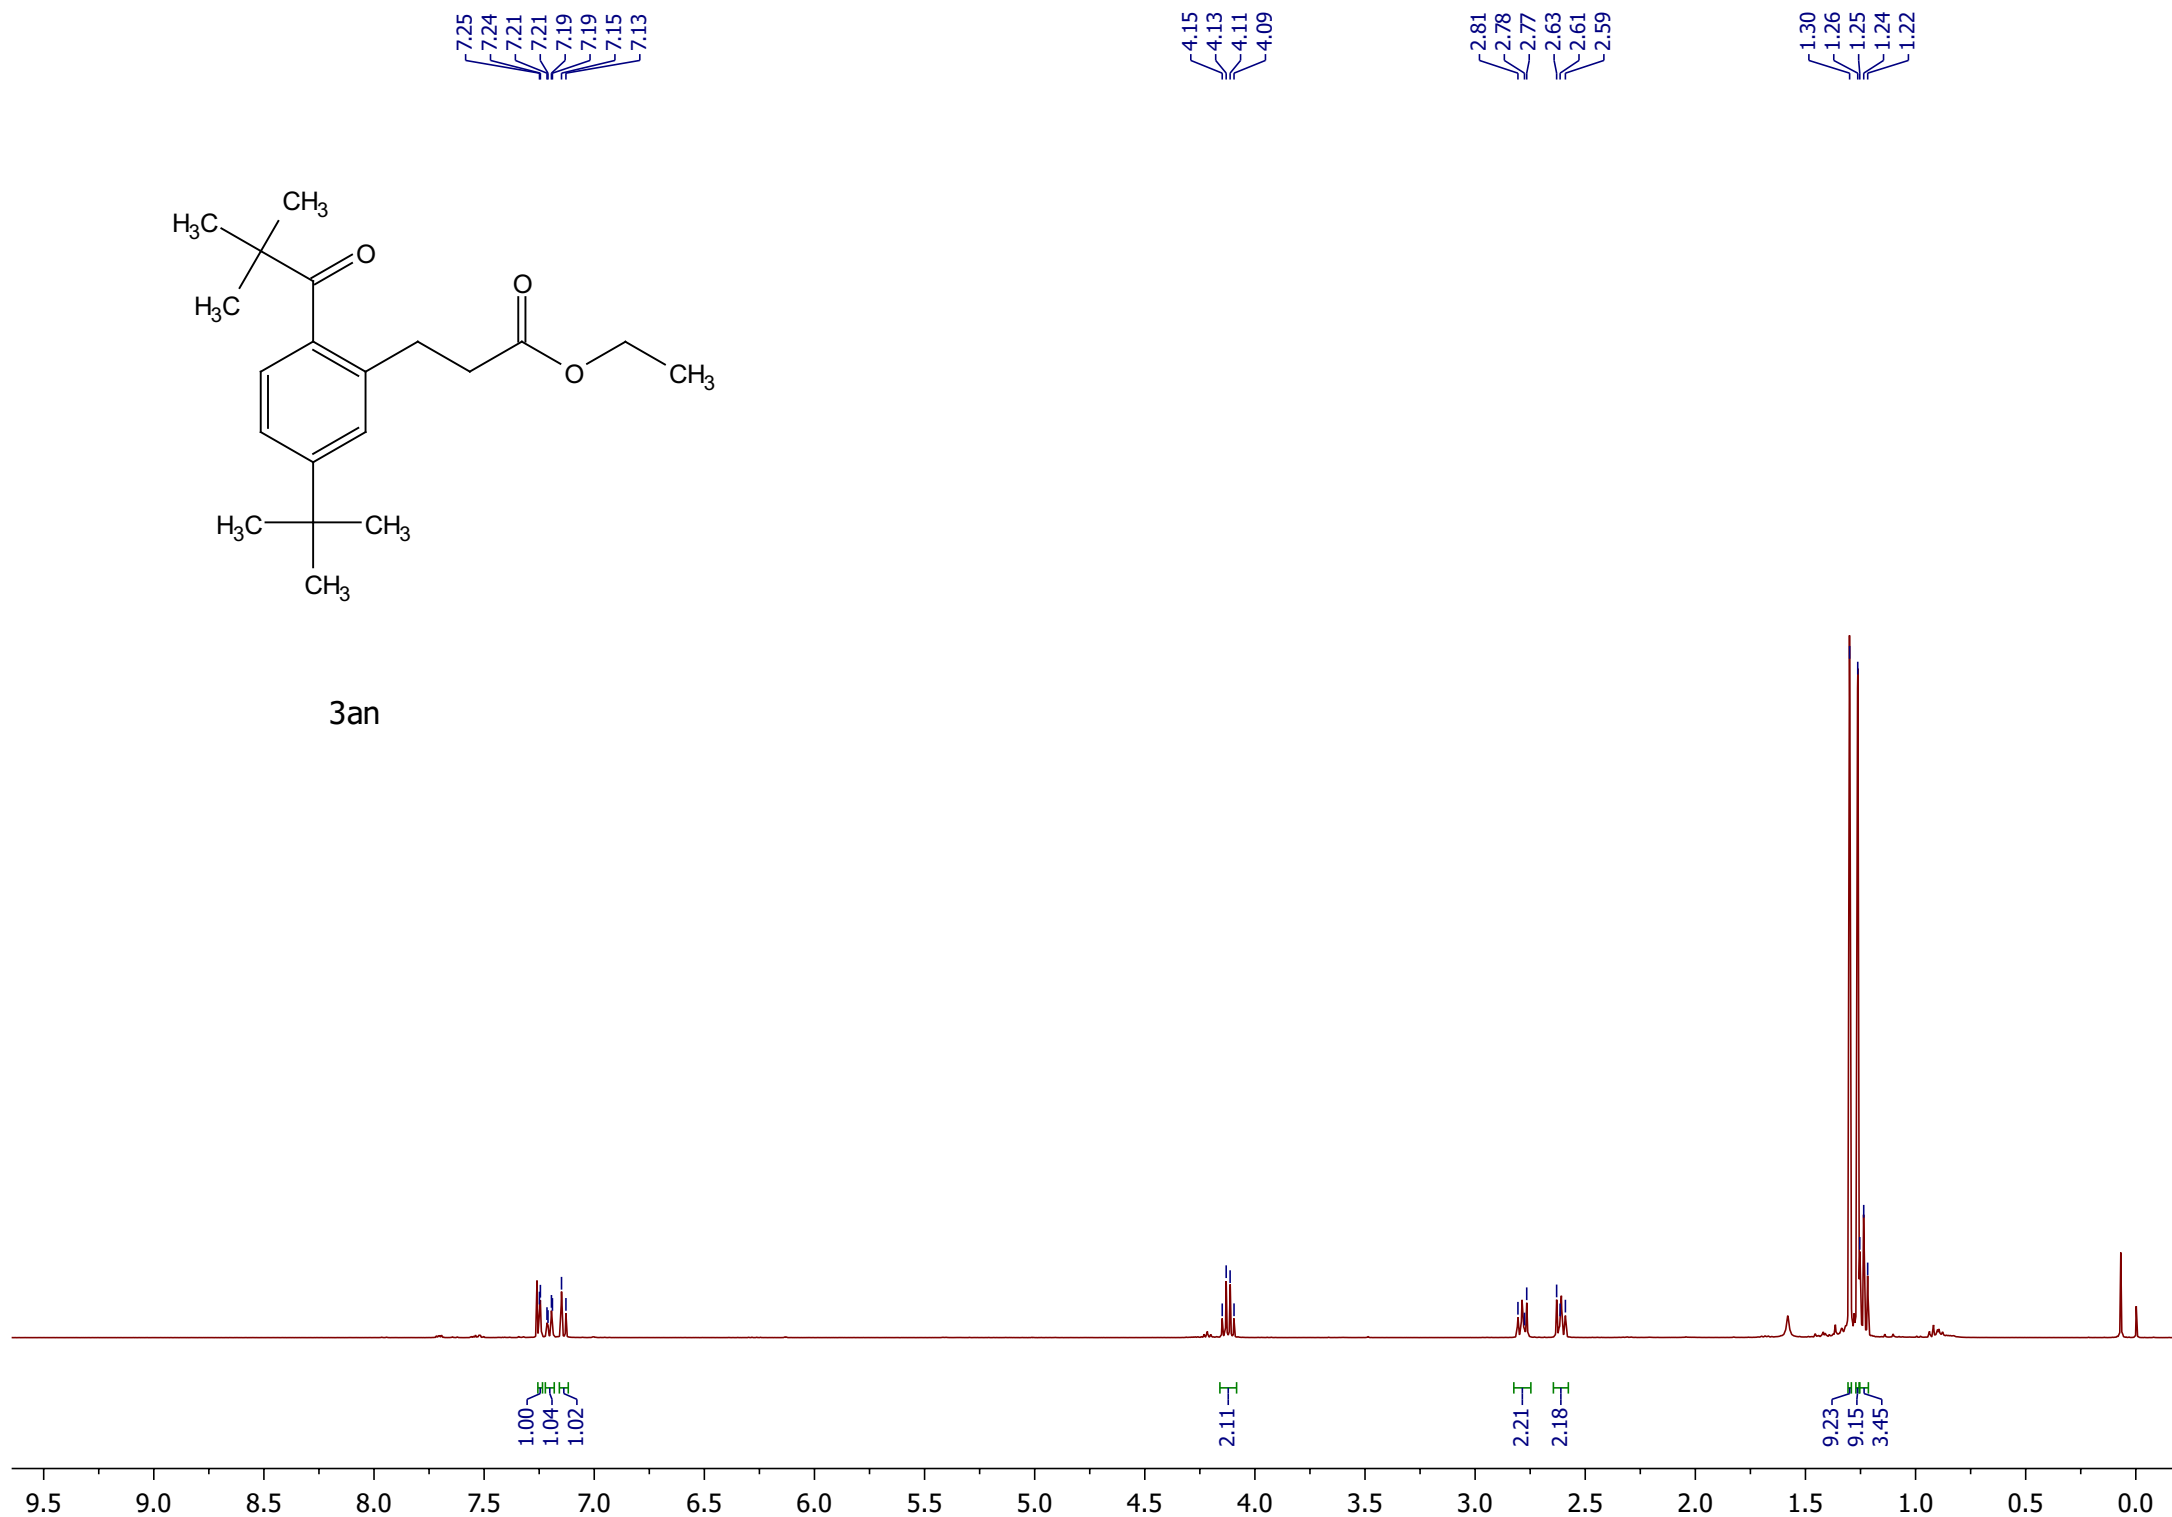

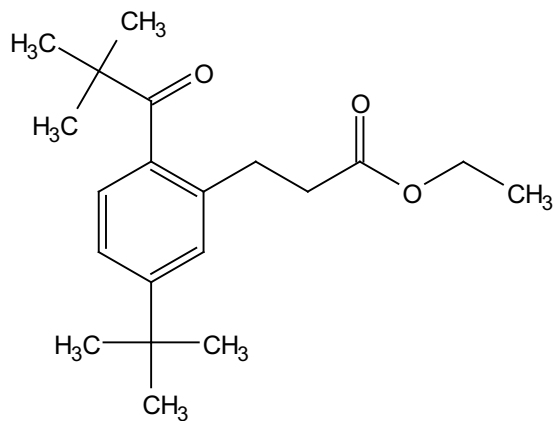

3an

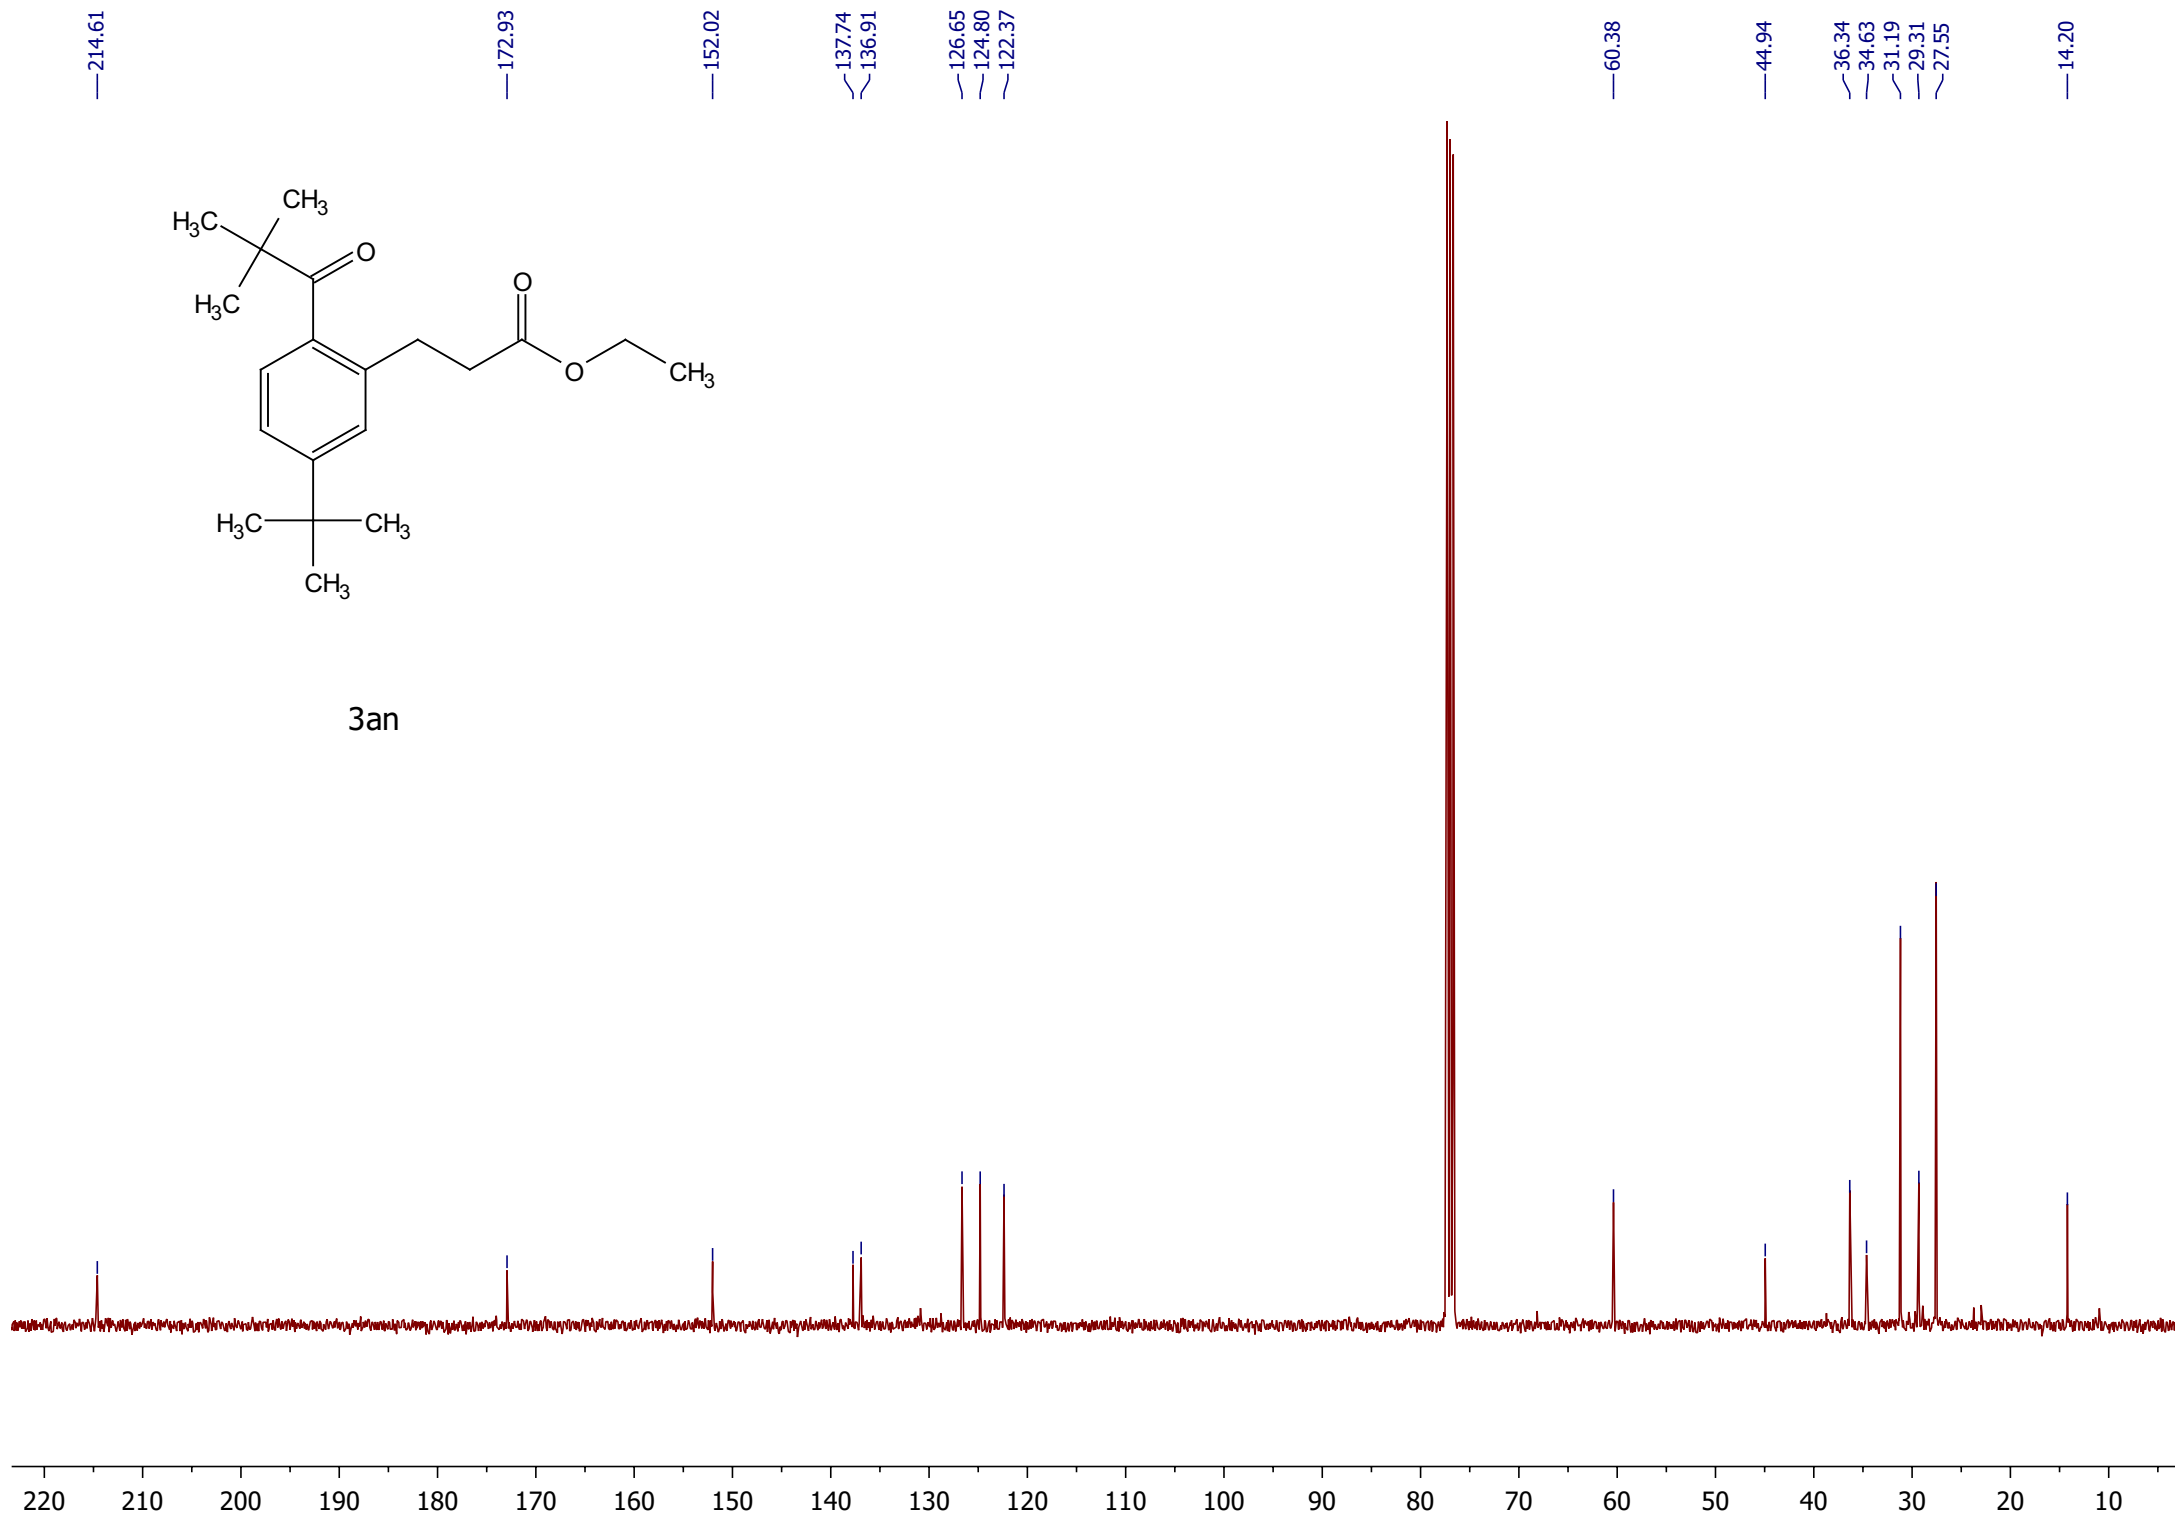

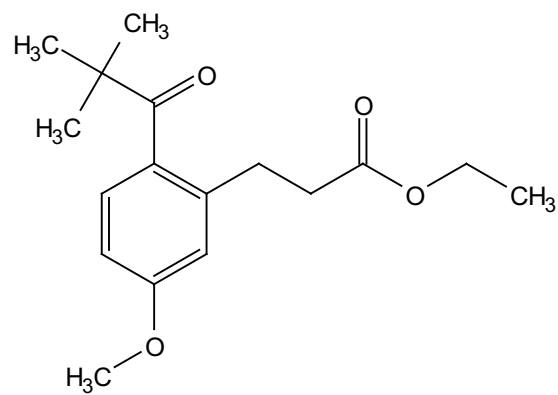

3ao

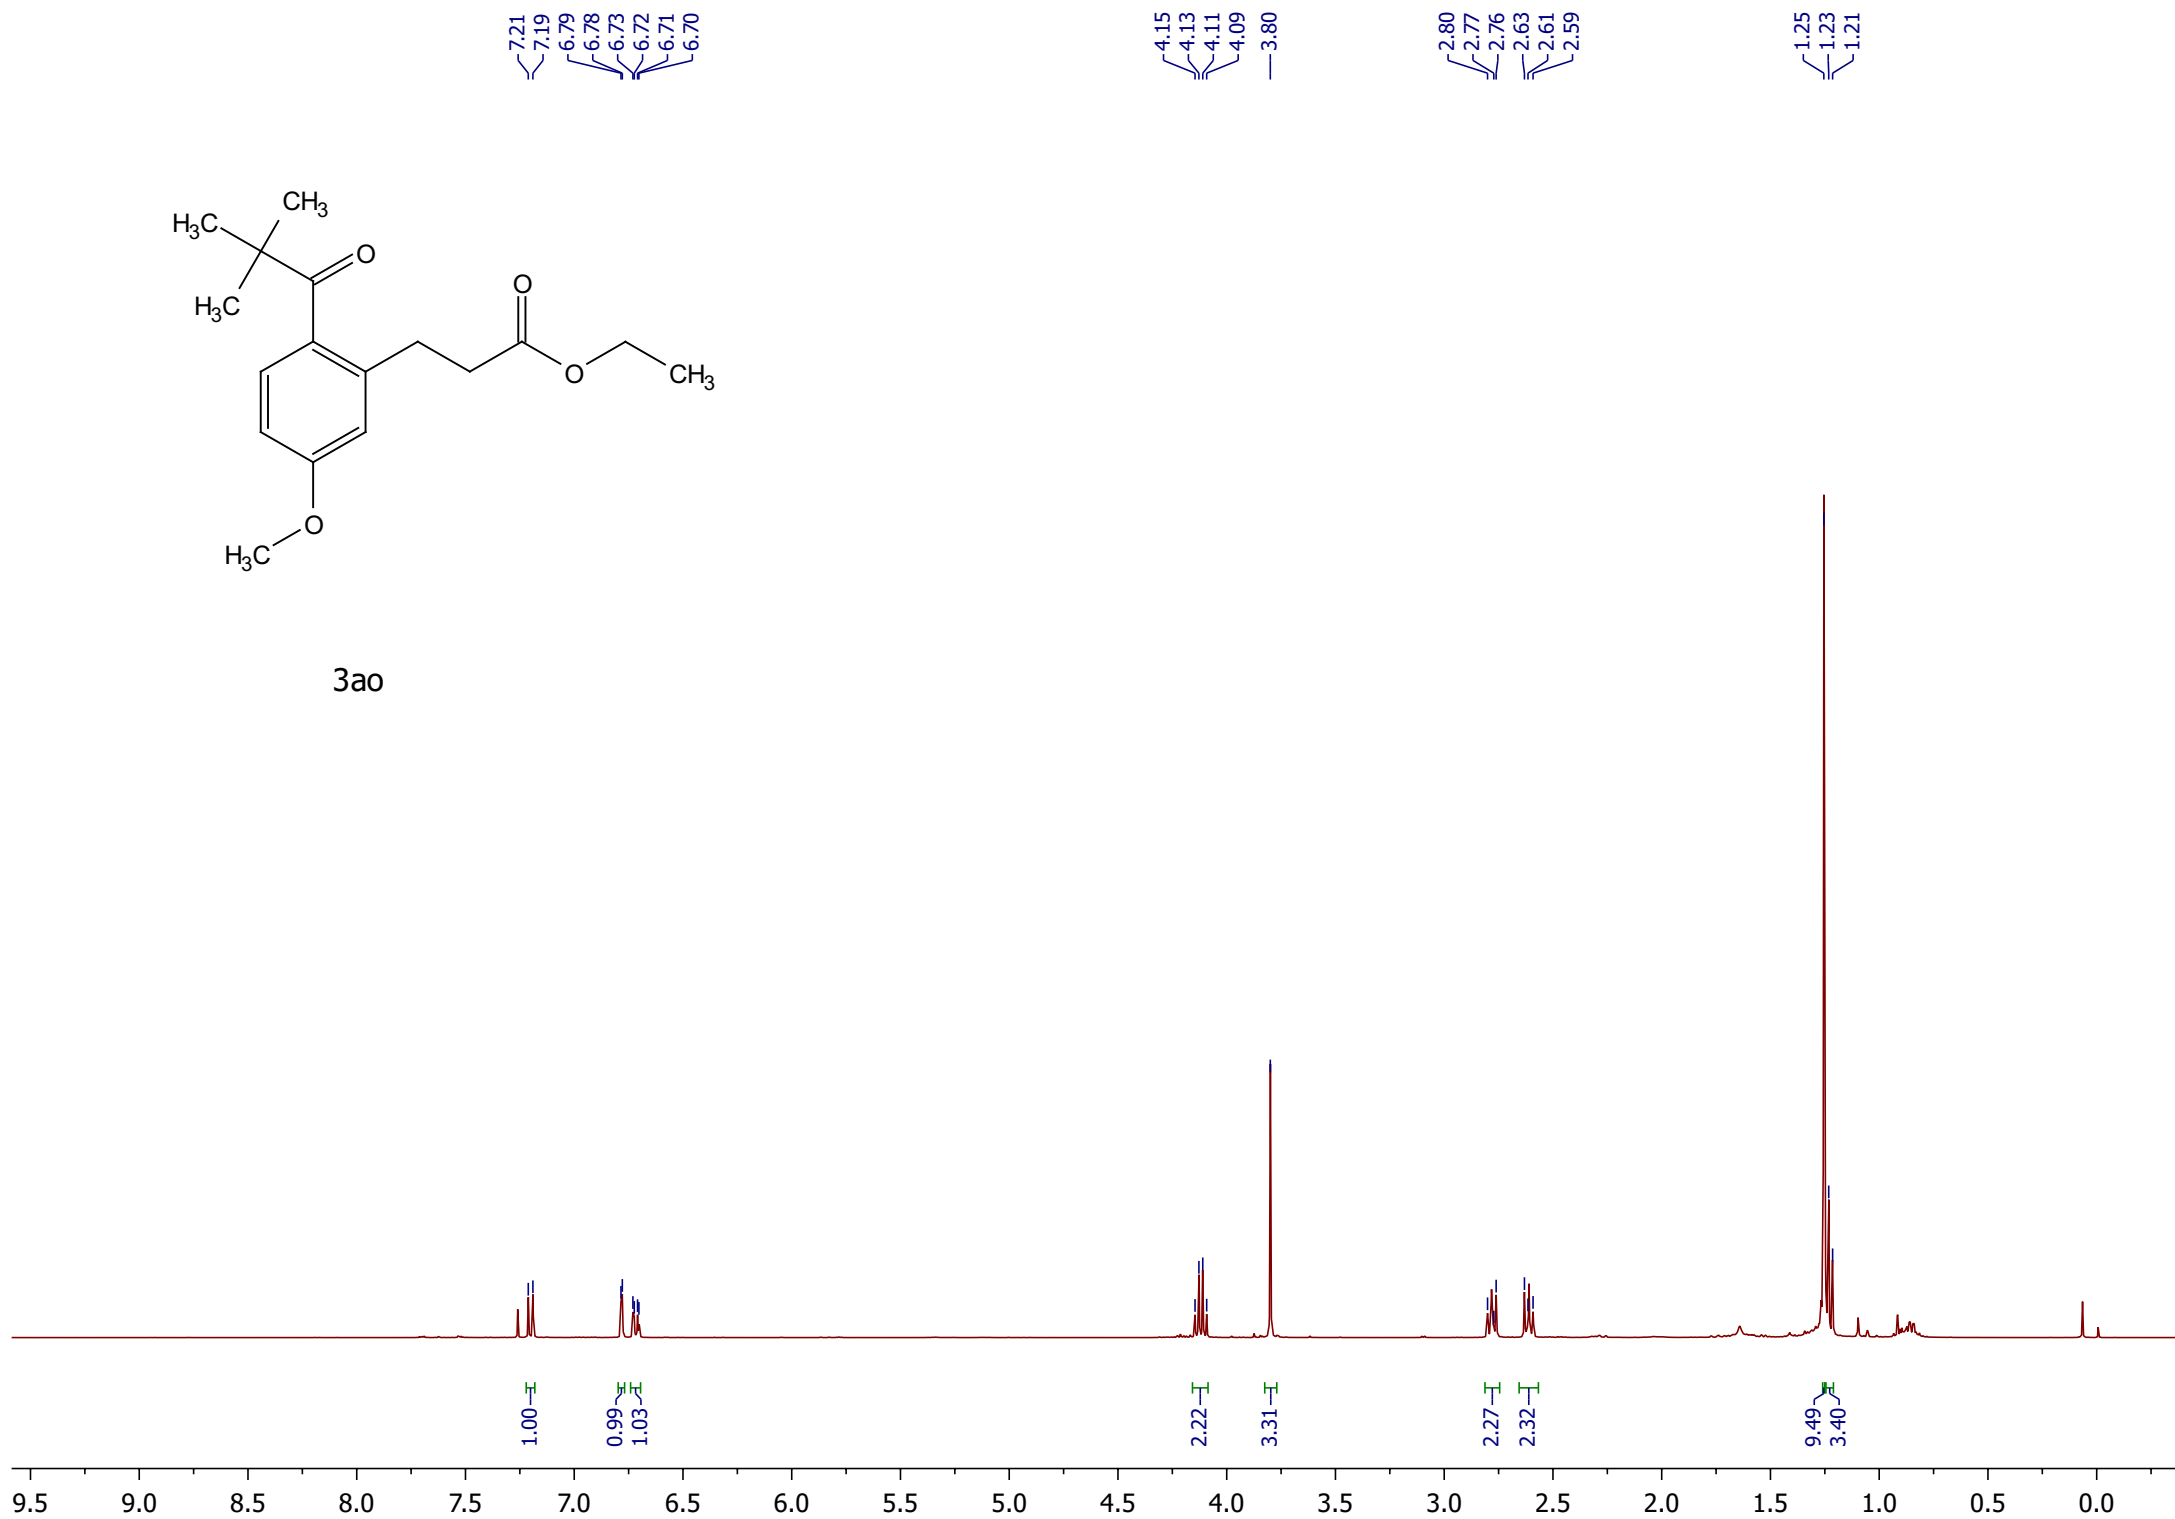



3ao

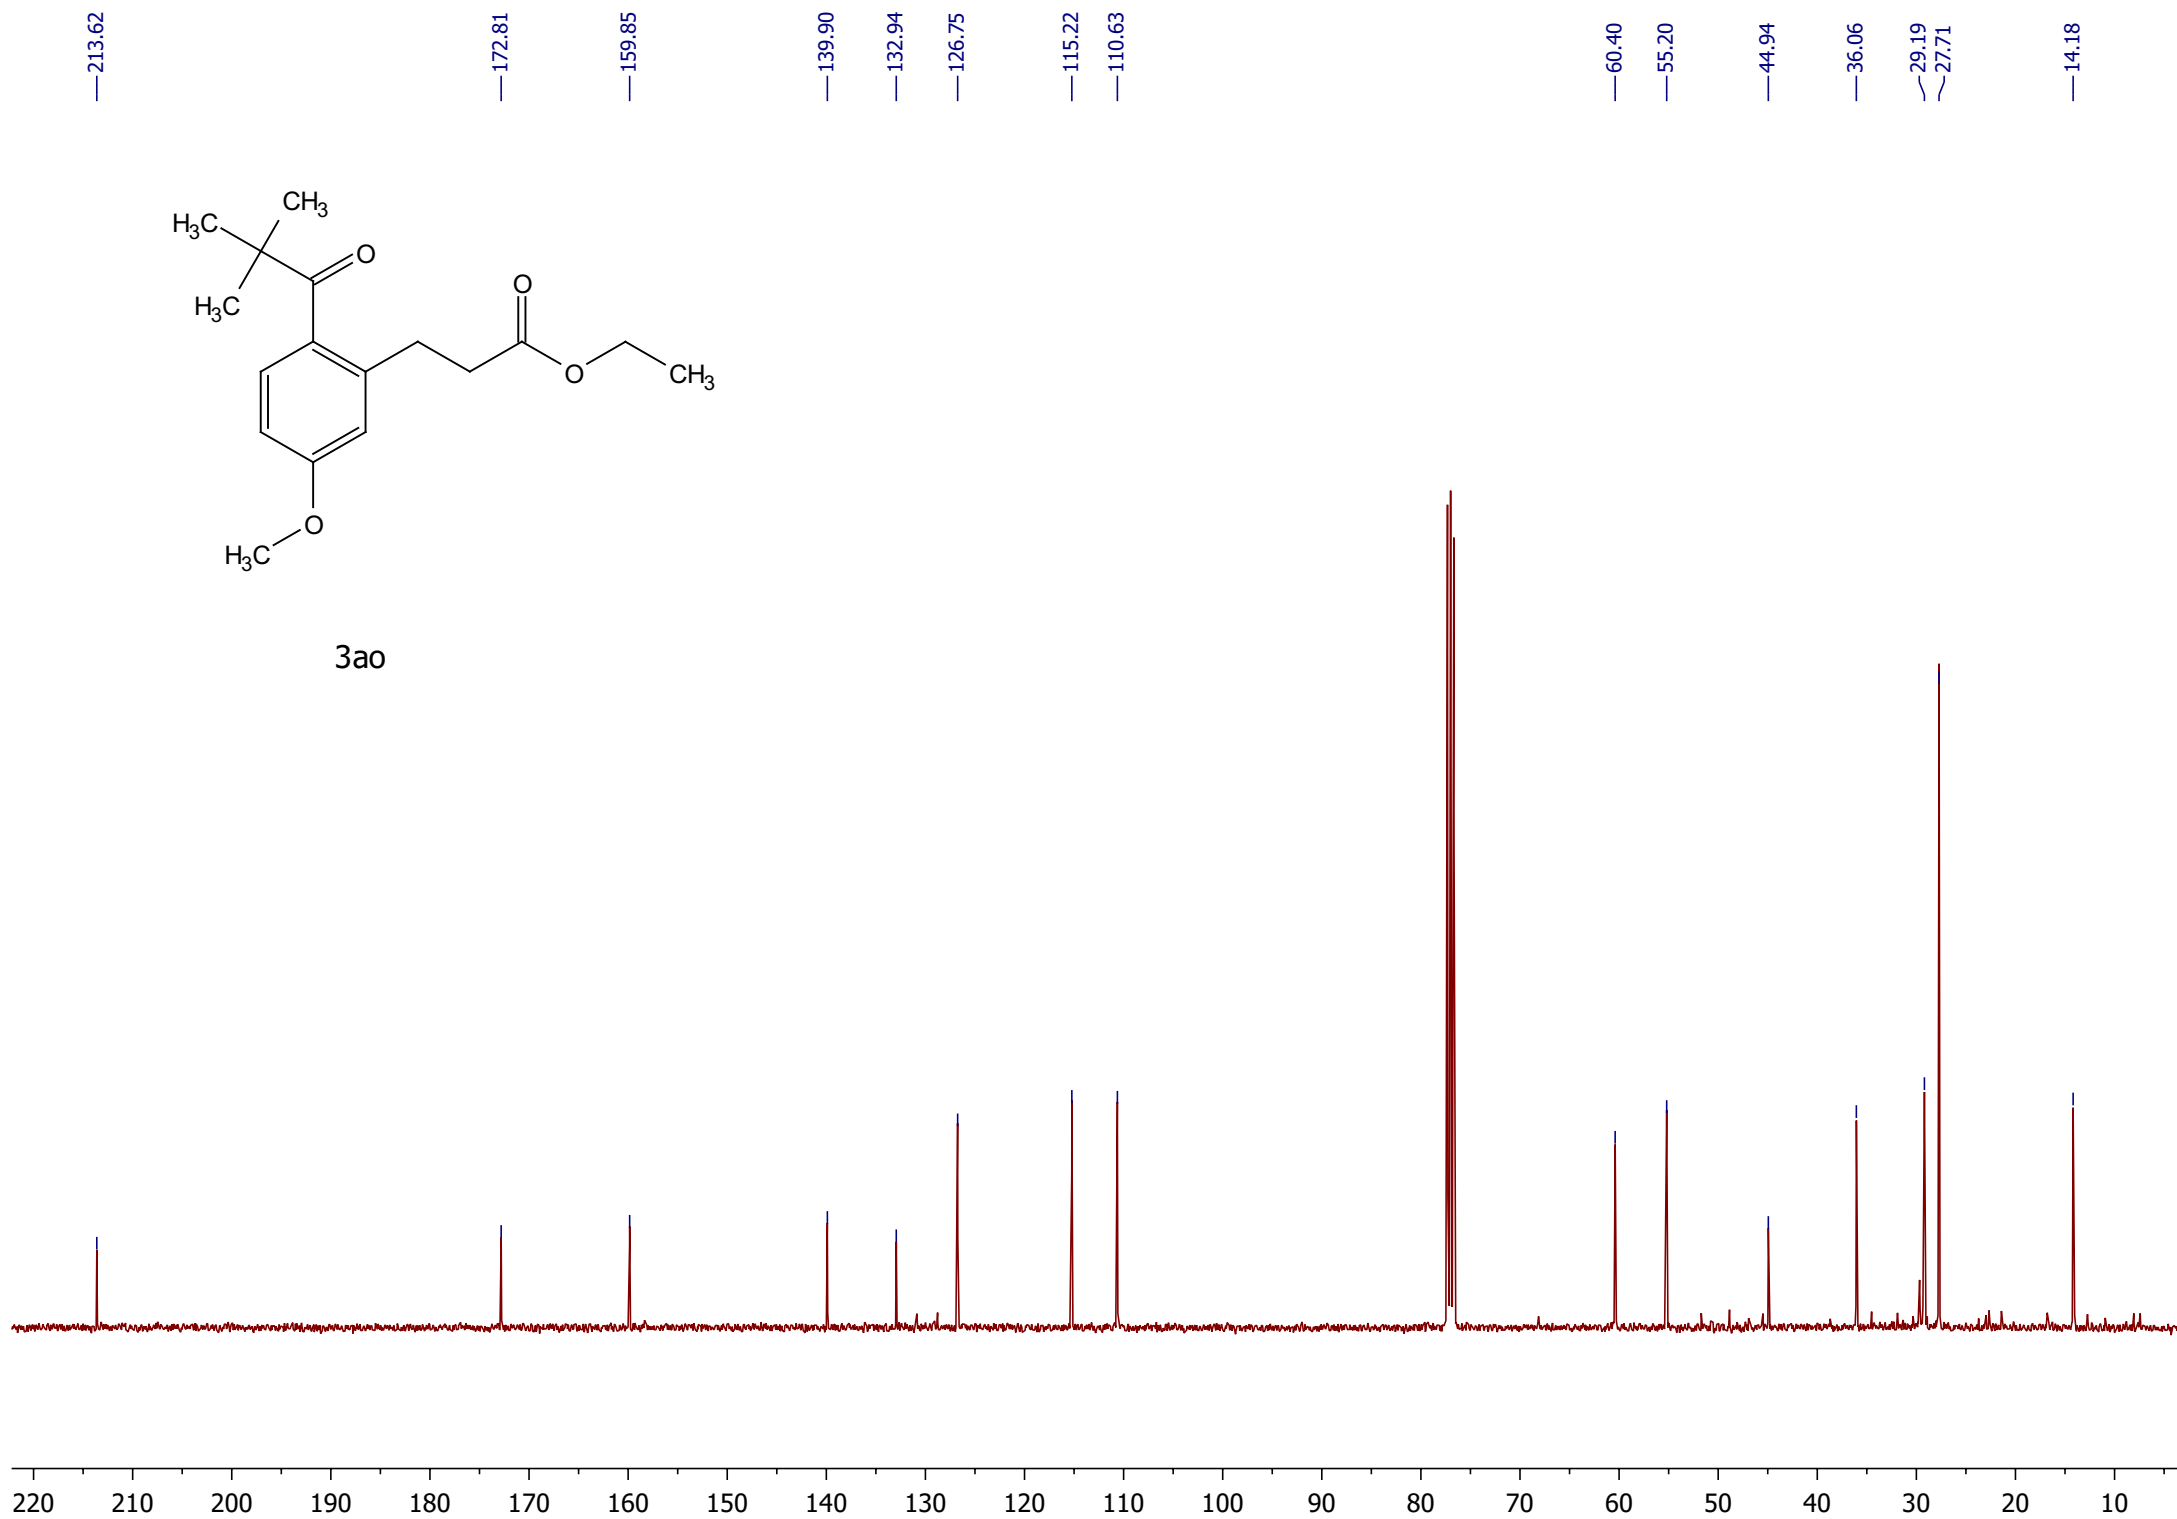

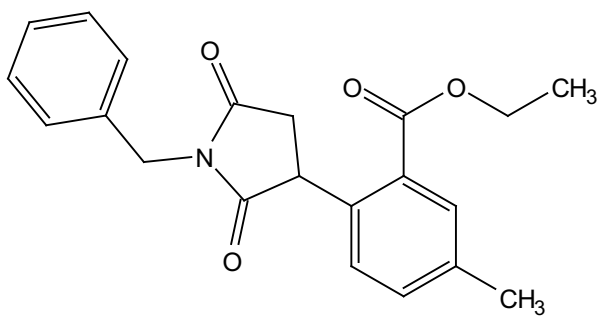

5ab

7.83  
7.82  
7.46  
7.46  
7.44  
7.44  
7.34  
7.30  
7.27  
7.03  
7.01

4.79  
4.75  
4.74  
4.71  
4.56  
4.55  
4.54  
4.52  
4.25  
4.23  
4.21  
4.19

3.22  
3.20  
3.17  
3.15  
2.78  
2.77  
2.74  
2.72  
2.37

1.35  
1.33  
1.32

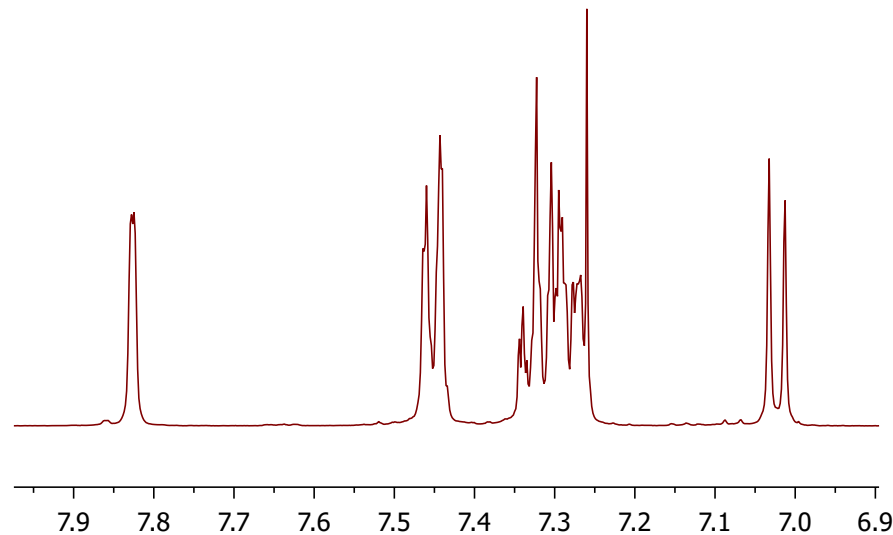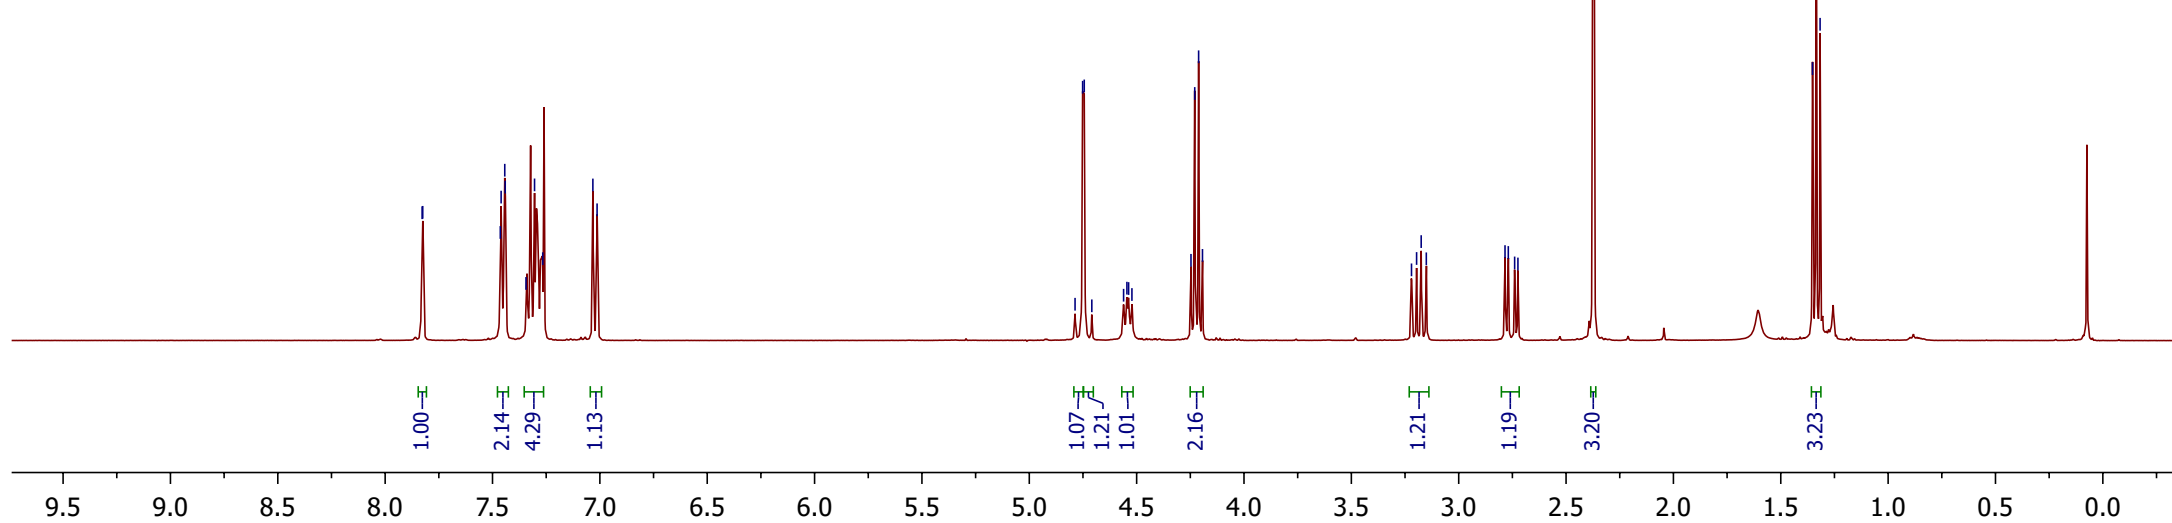

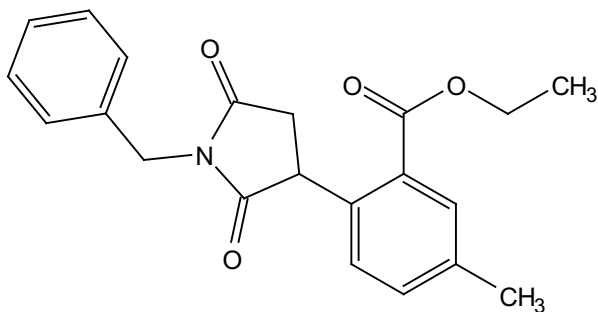

5ab

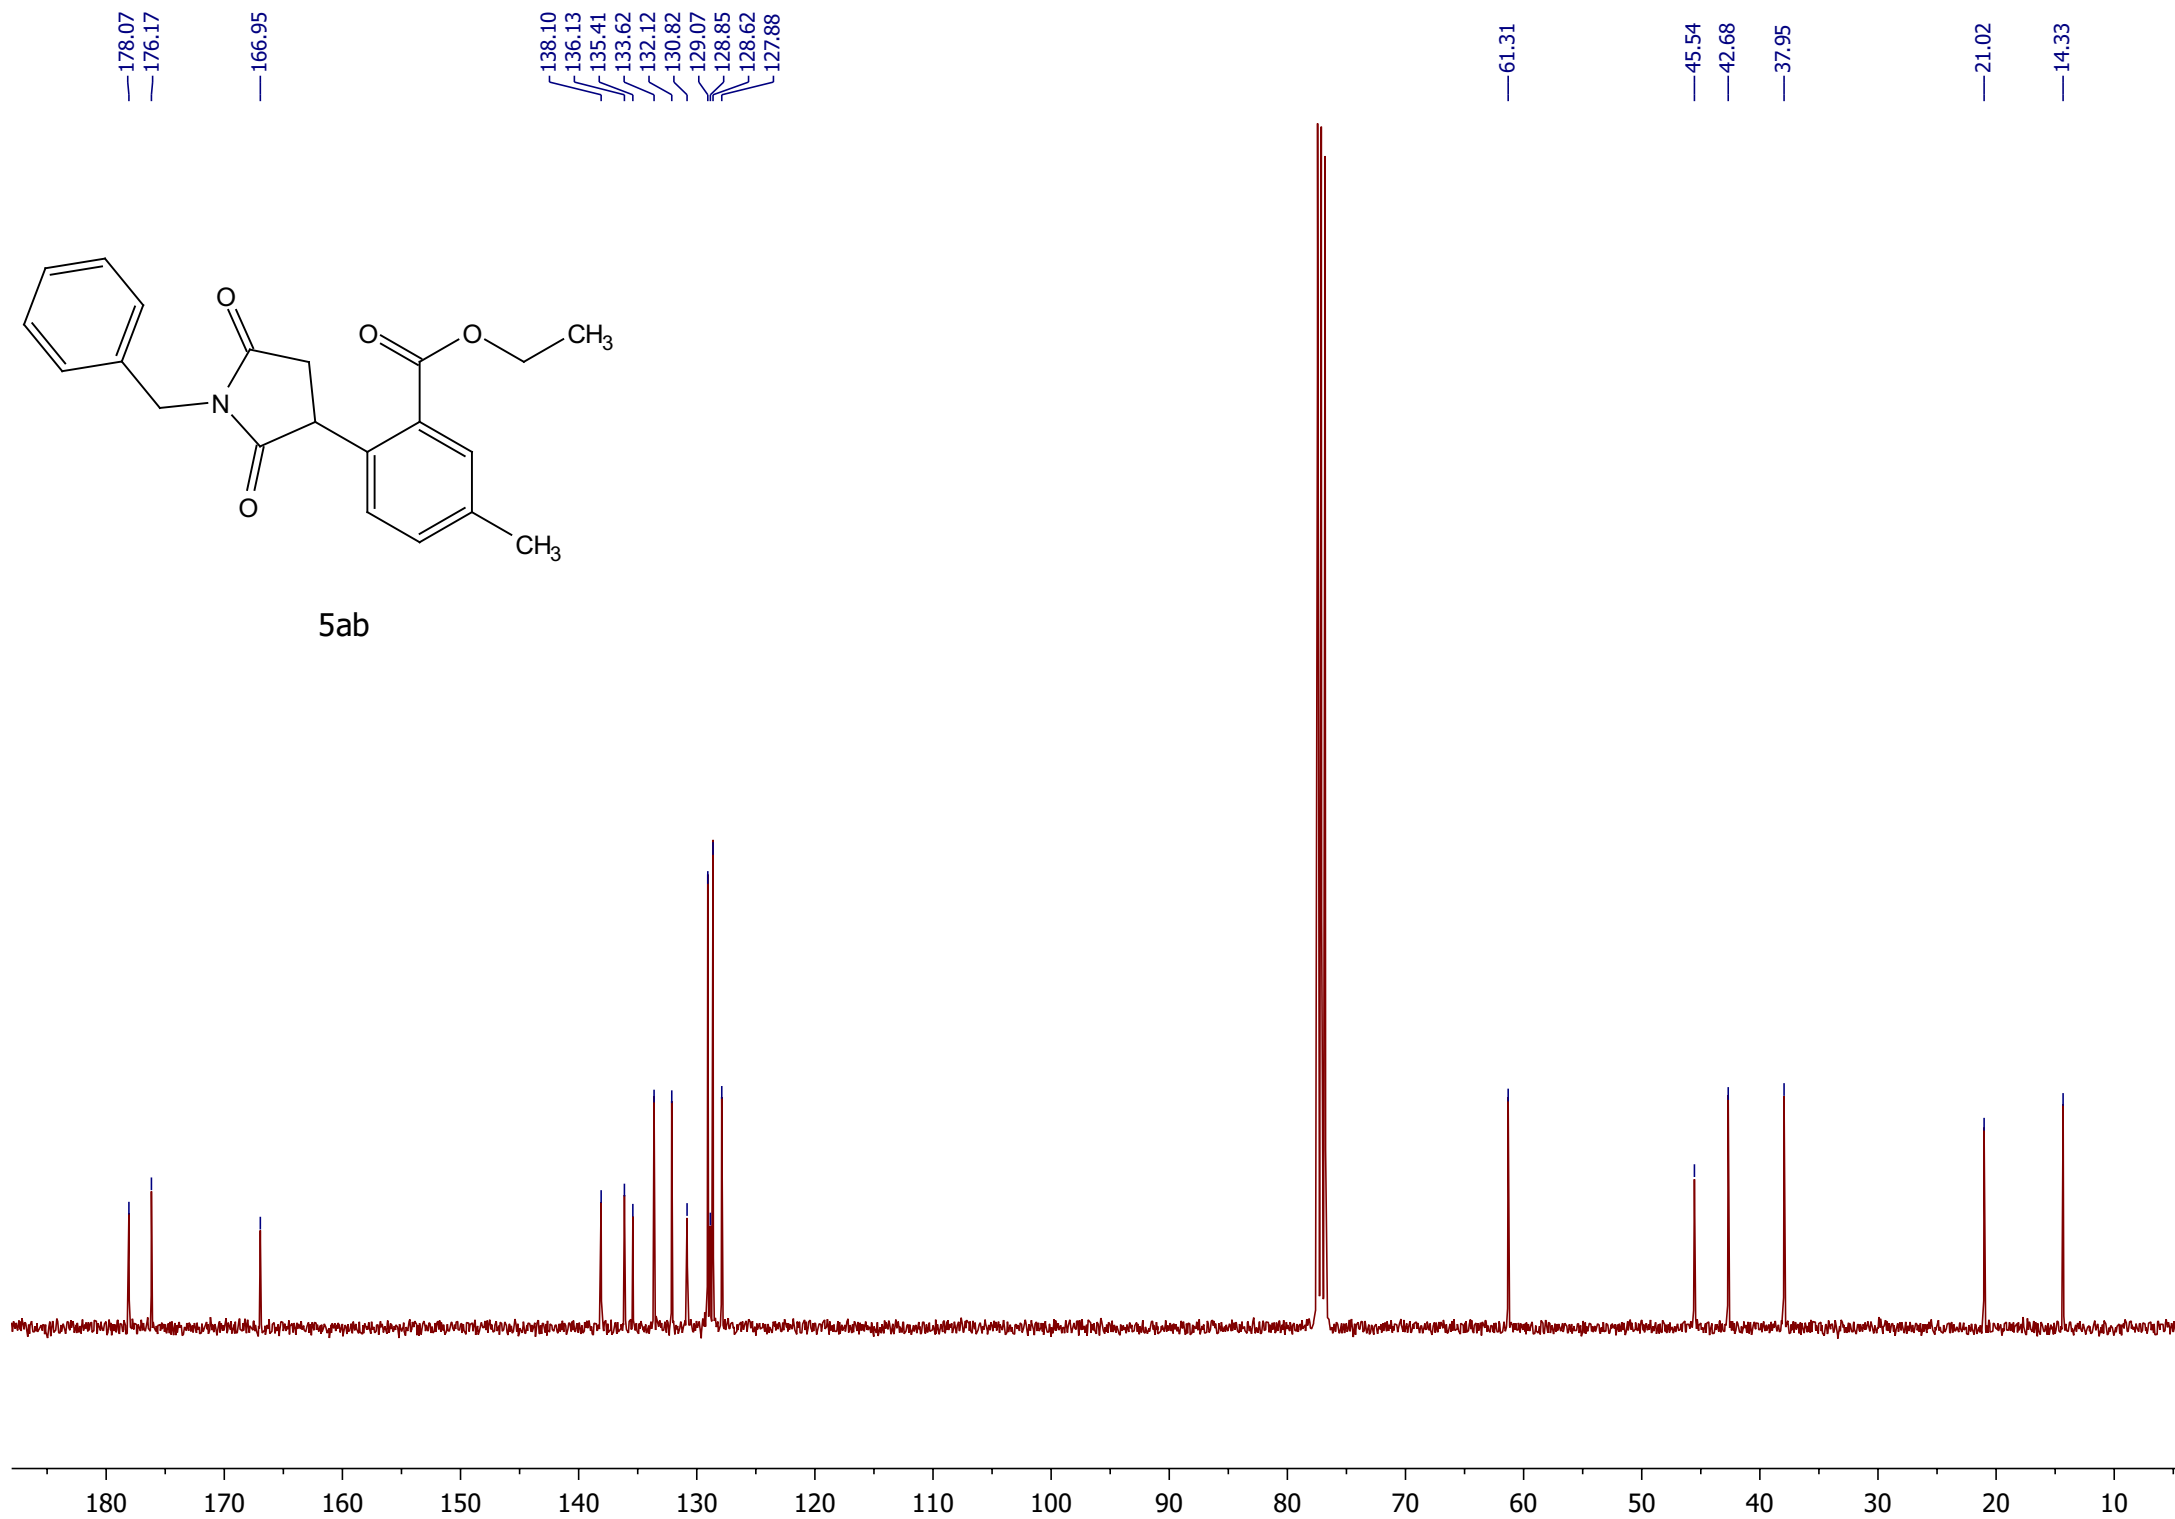

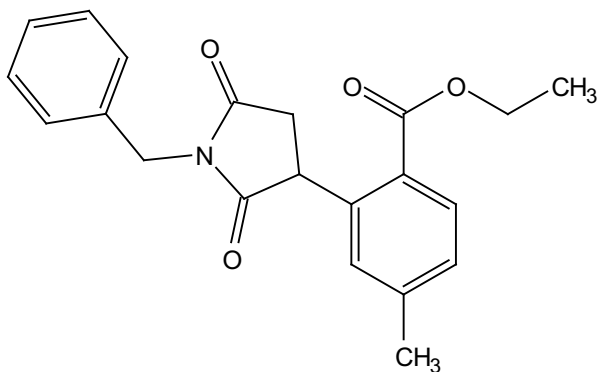

5b

7.93  
7.92  
7.47  
7.46  
7.34  
7.27  
7.17  
7.17  
7.16  
6.88

4.79  
4.76  
4.73  
4.61  
4.58  
4.24  
4.22  
4.21  
4.20

3.22  
3.21  
3.19  
3.17  
2.77  
2.75  
2.73  
2.72  
2.32

1.34  
1.33  
1.31

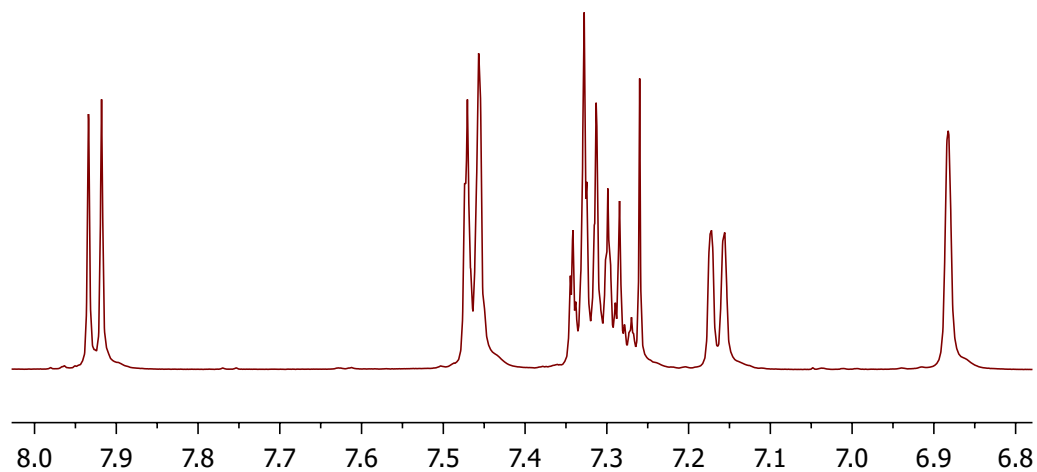

1.00

2.01

3.33

1.02

1.01

1.03

1.09

1.02

2.13

1.10

1.10

3.00

3.26

9.5 9.0 8.5 8.0 7.5 7.0 6.5 6.0 5.5 5.0 4.5 4.0 3.5 3.0 2.5 2.0 1.5 1.0 0.5 0.0

5bb

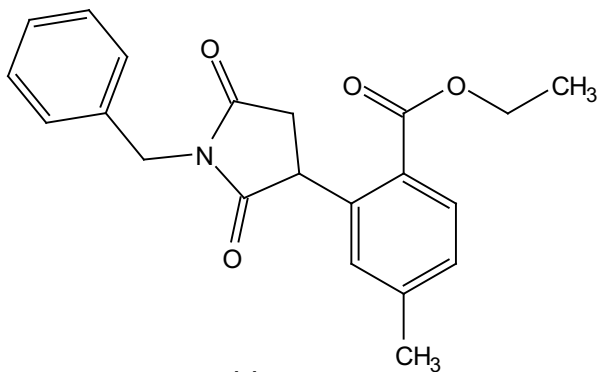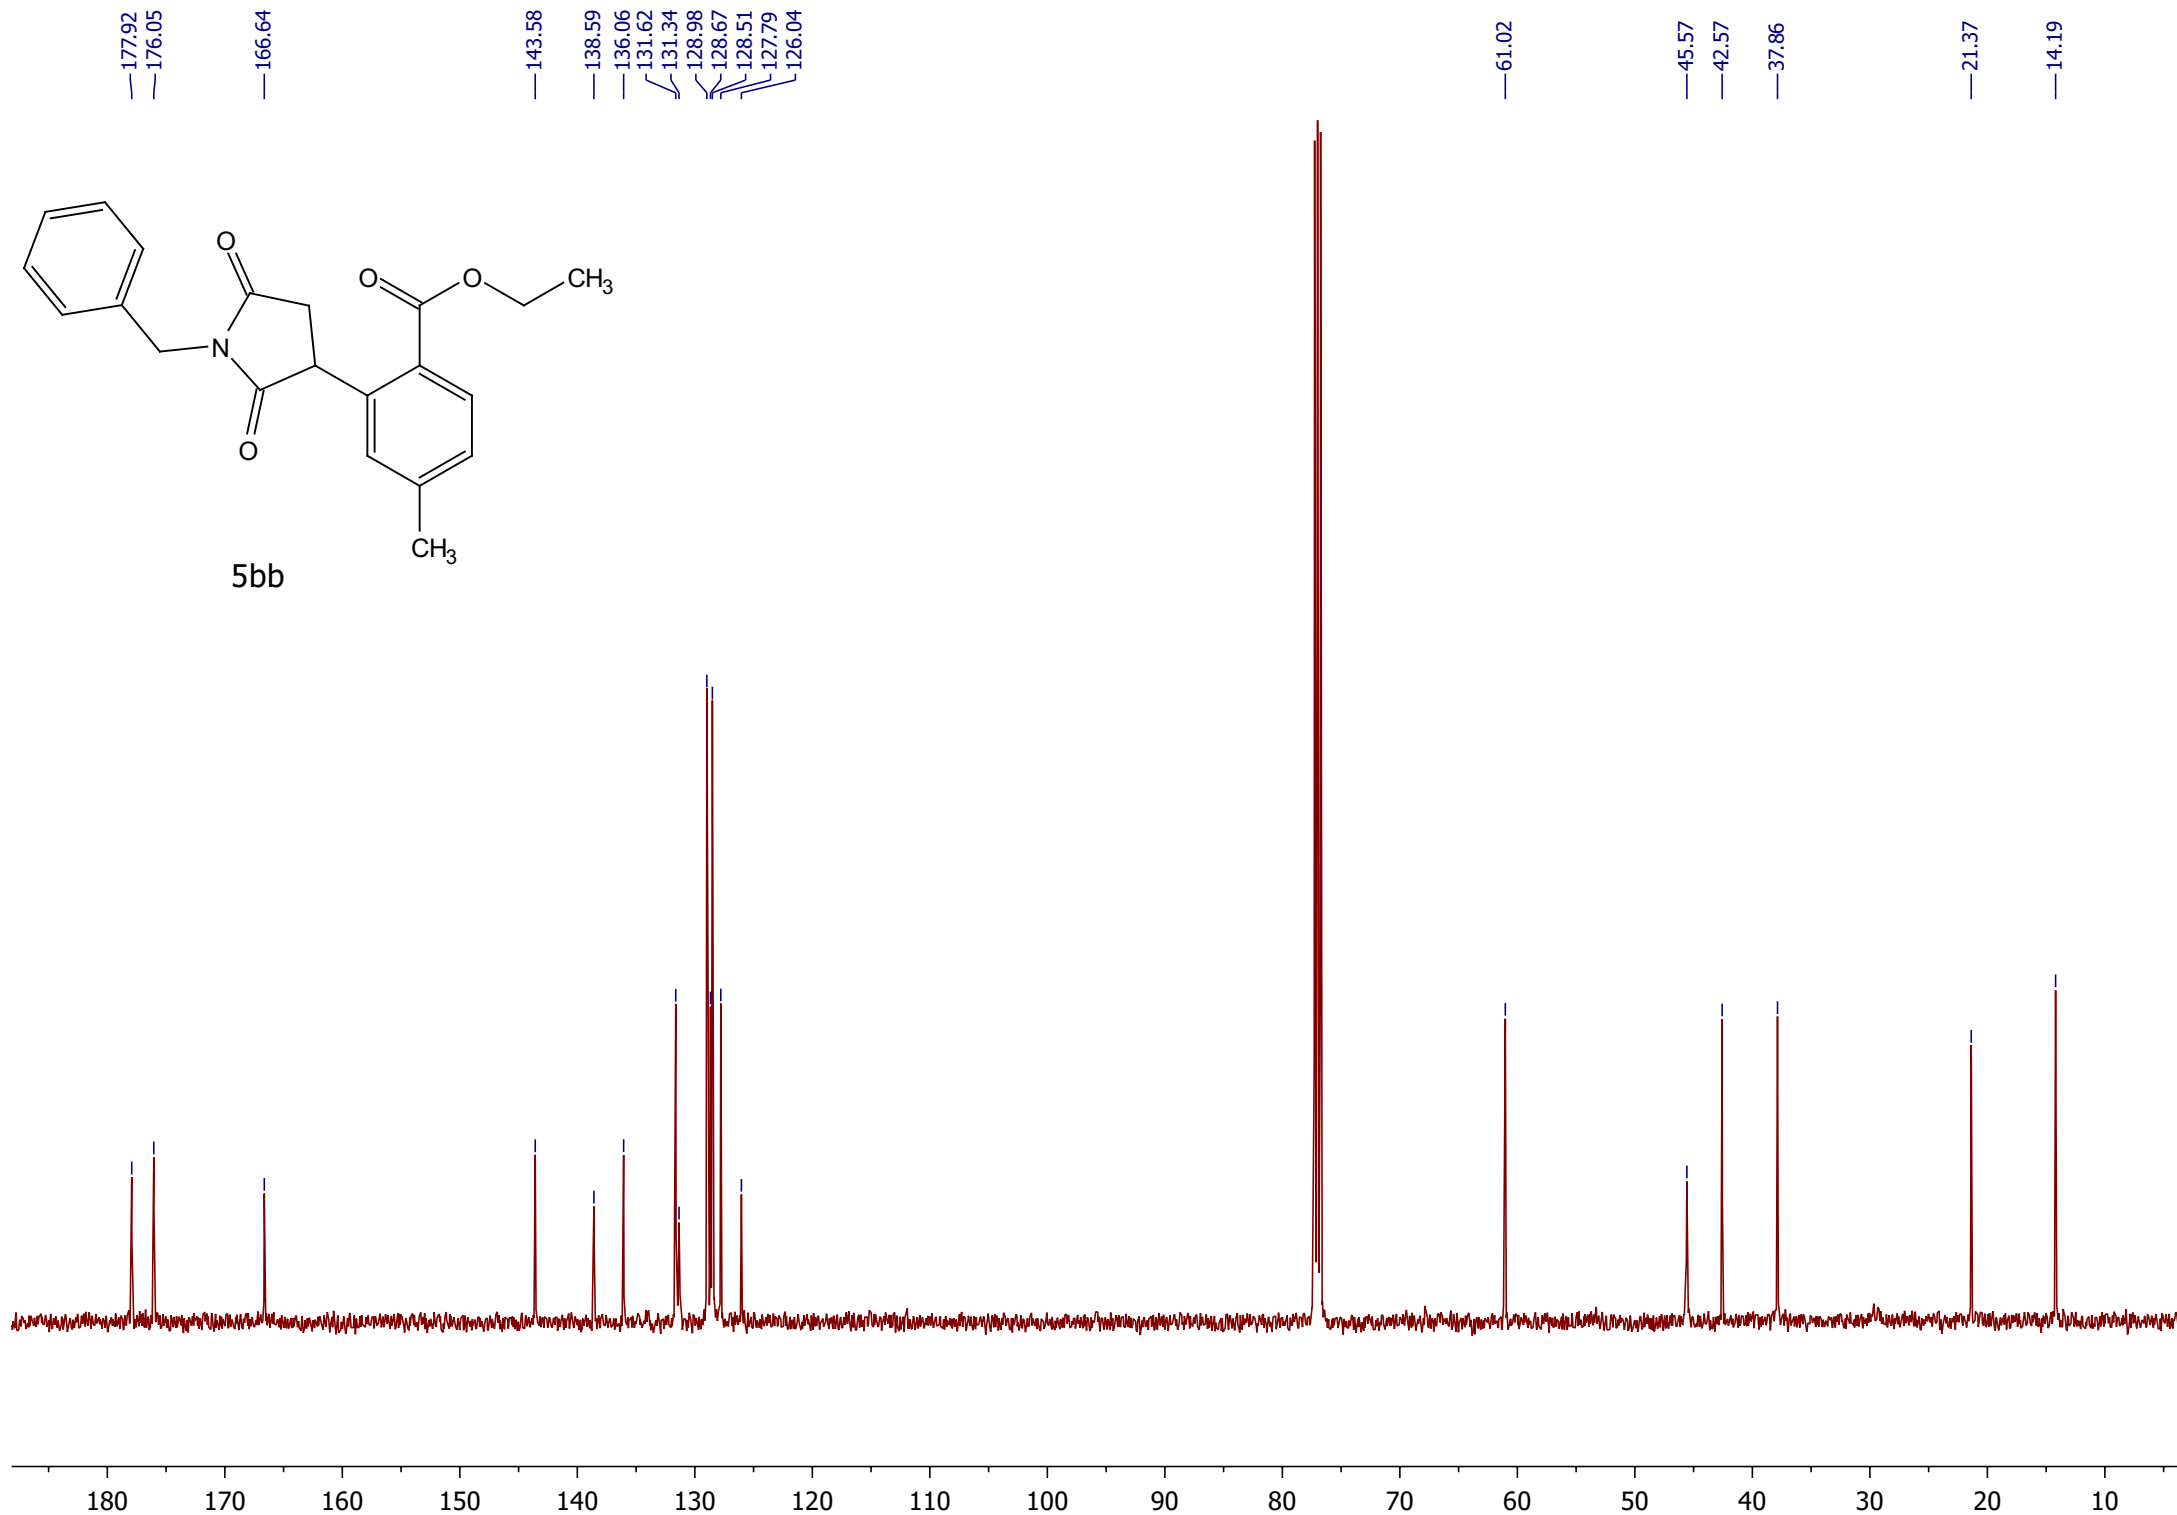

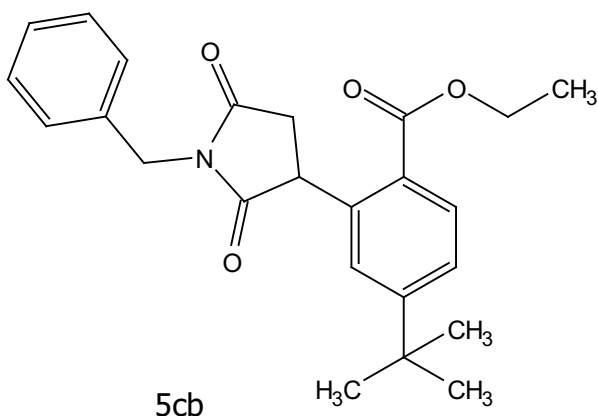

7.97  
7.96  
7.48  
7.46  
7.46  
7.39  
7.38  
7.37  
7.37  
7.34  
7.27  
7.08  
7.08

4.80  
4.77  
4.76  
4.73  
4.59  
4.58  
4.57  
4.56  
4.24  
4.22  
4.21  
4.19

3.24  
3.22  
3.20  
3.18  
2.80  
2.79  
2.76  
2.75

1.33  
1.32  
1.31  
1.25

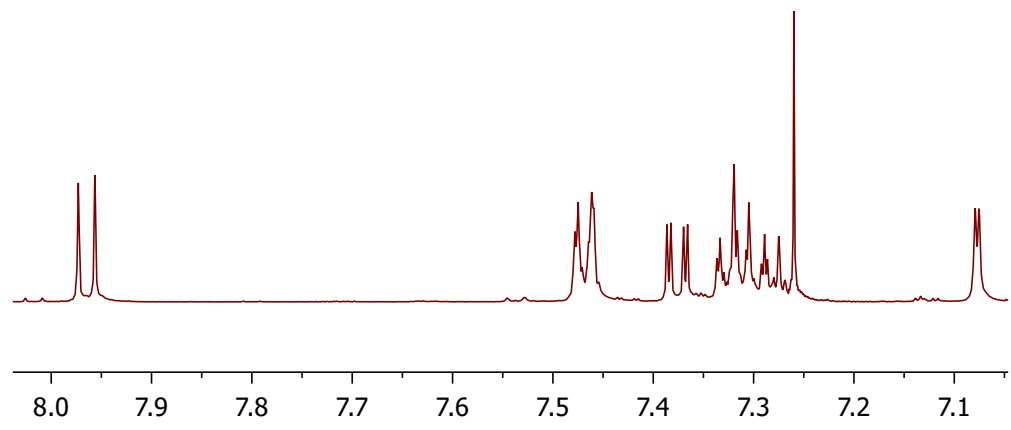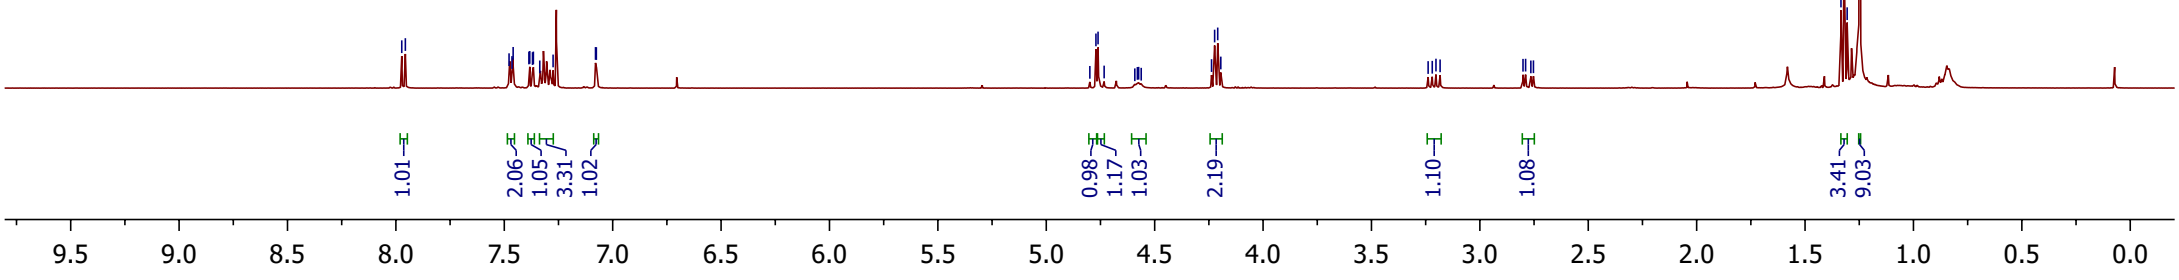

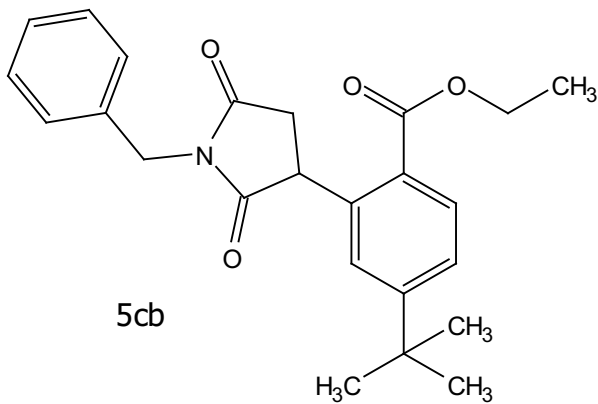

5cb

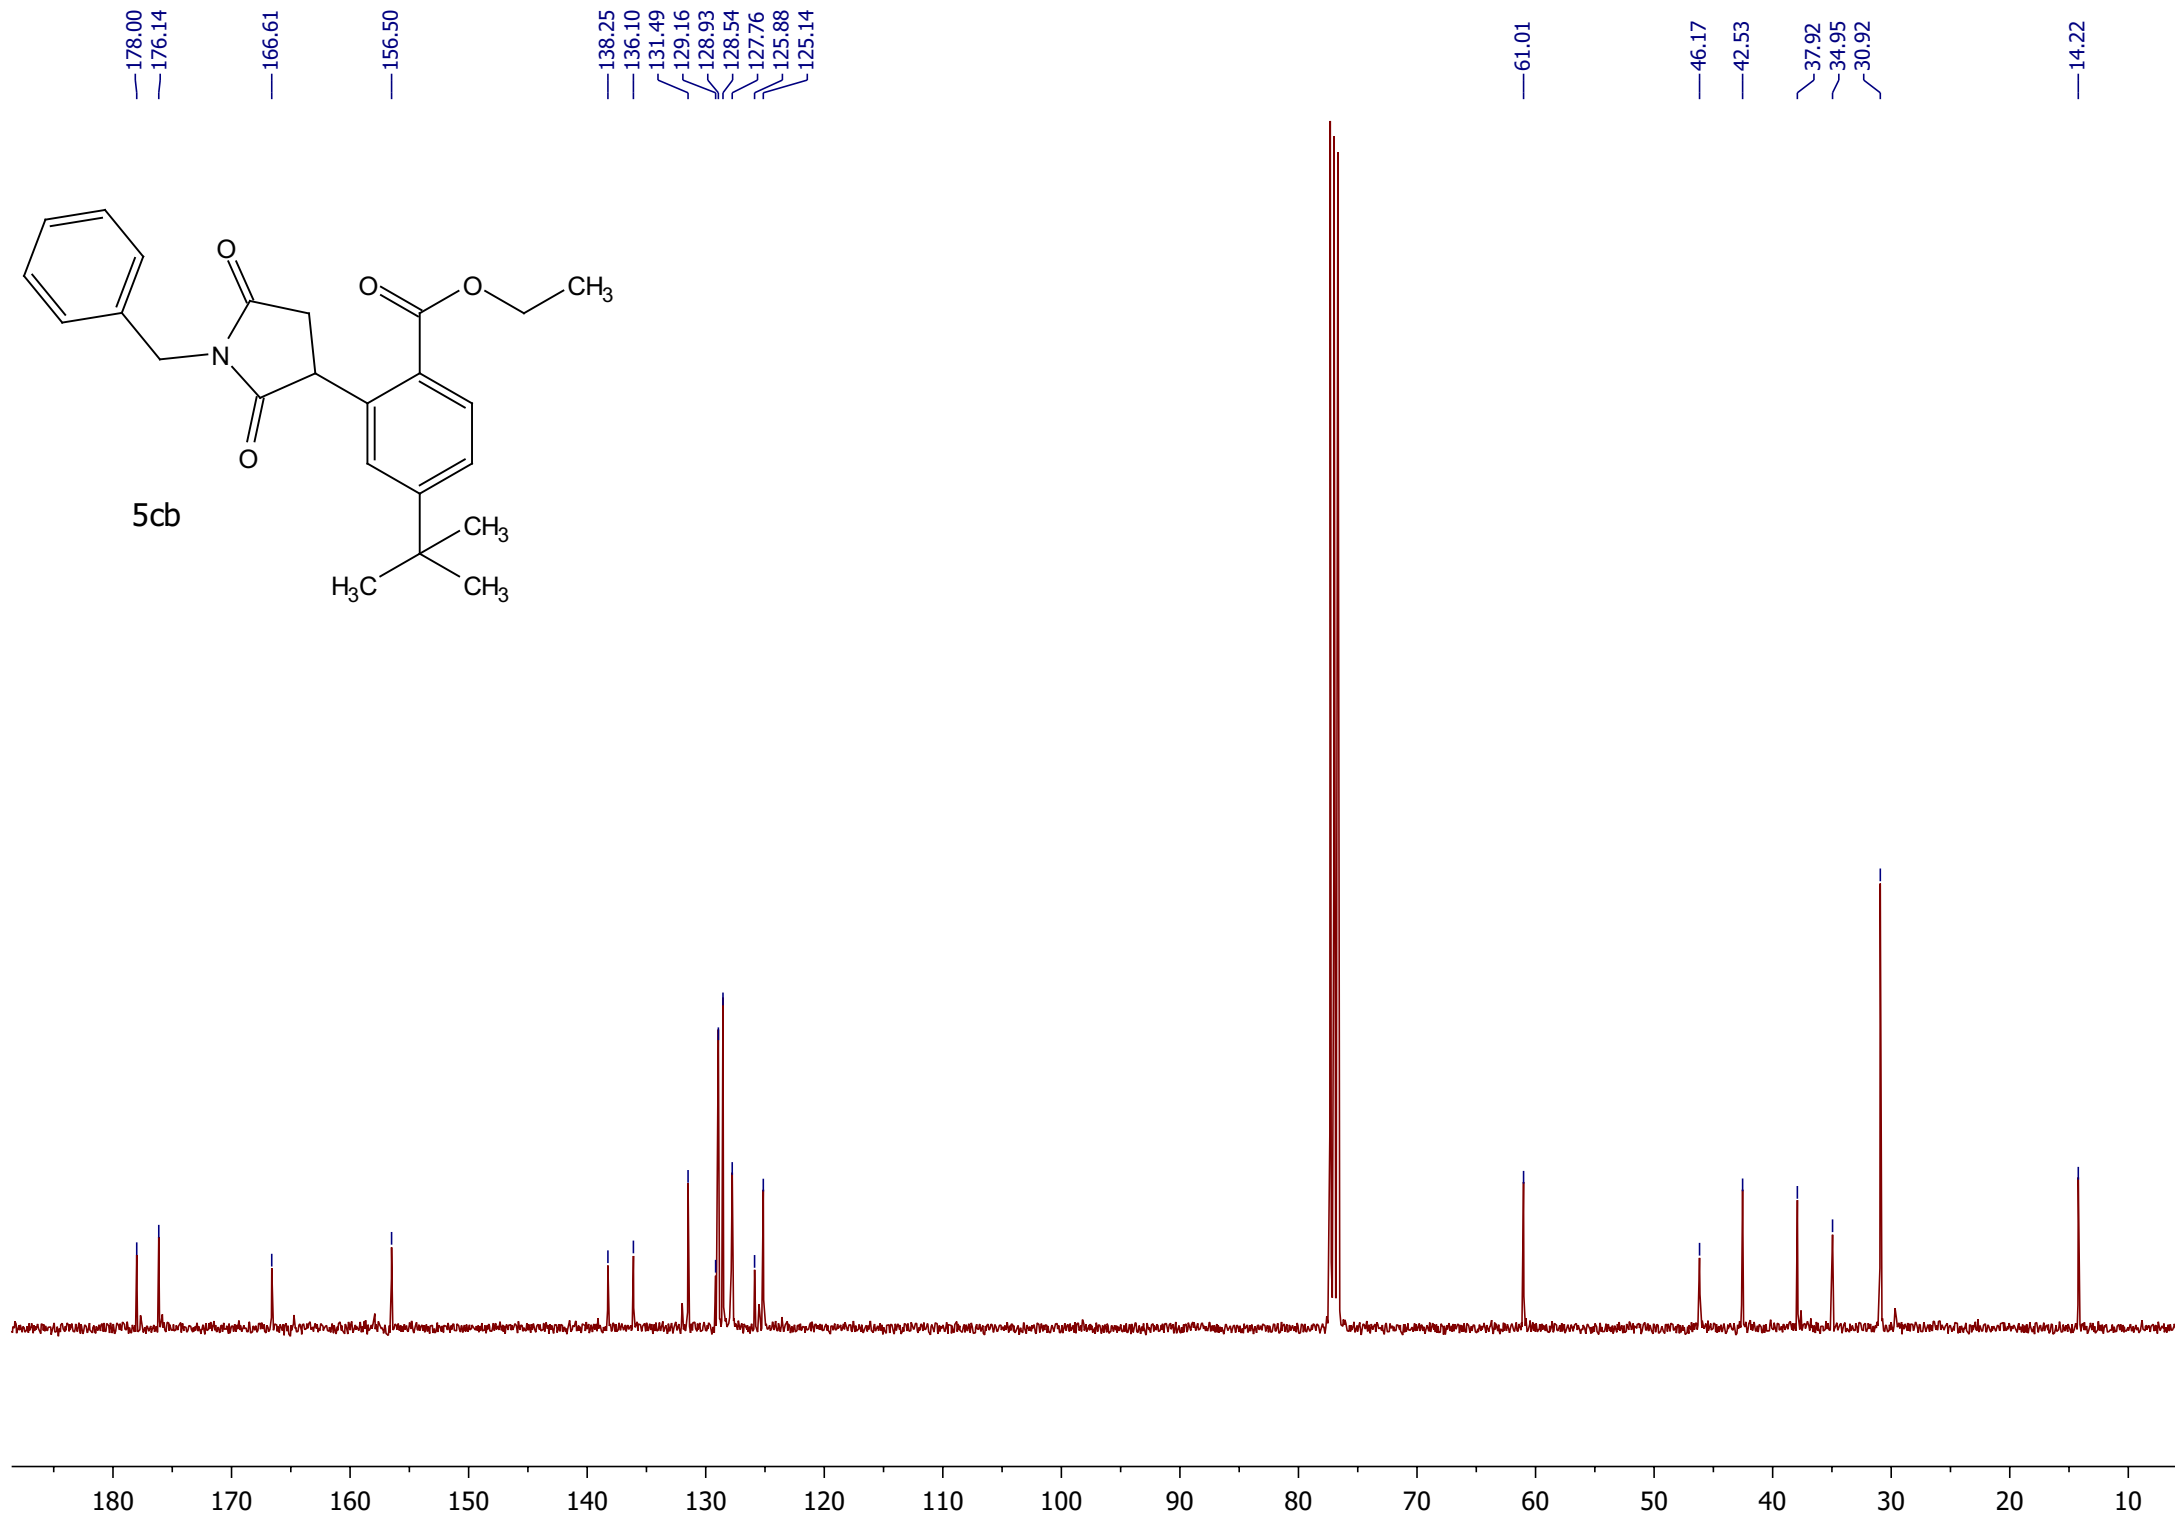

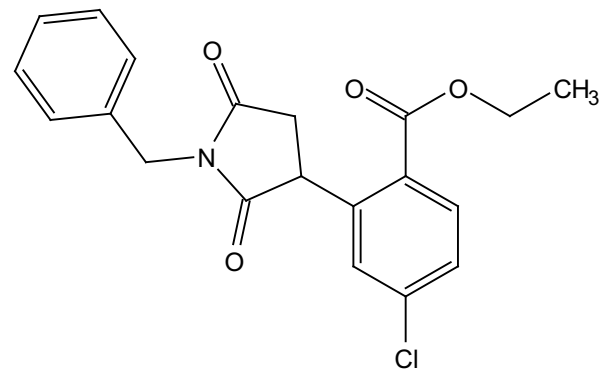

5db

7.97  
7.95  
7.45  
7.43  
7.36  
7.32  
7.28  
7.13  
7.12

4.78  
4.74  
4.74  
4.70  
4.56  
4.54  
4.54  
4.52  
4.23  
4.21  
4.19  
4.18

3.23  
3.20  
3.18  
3.16  
2.78  
2.76  
2.73  
2.72

1.33  
1.31  
1.29

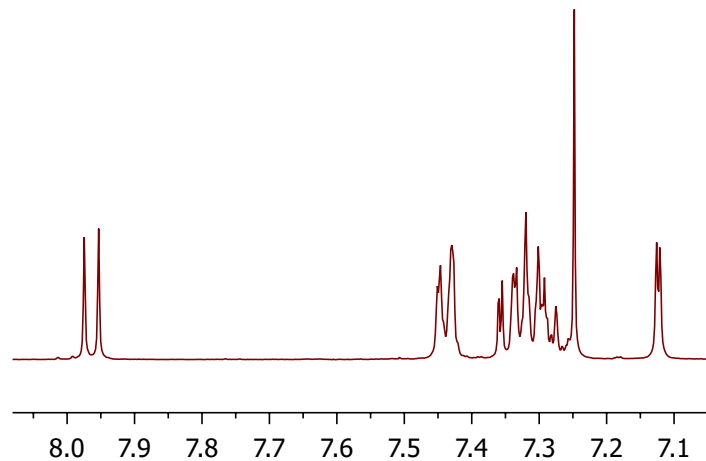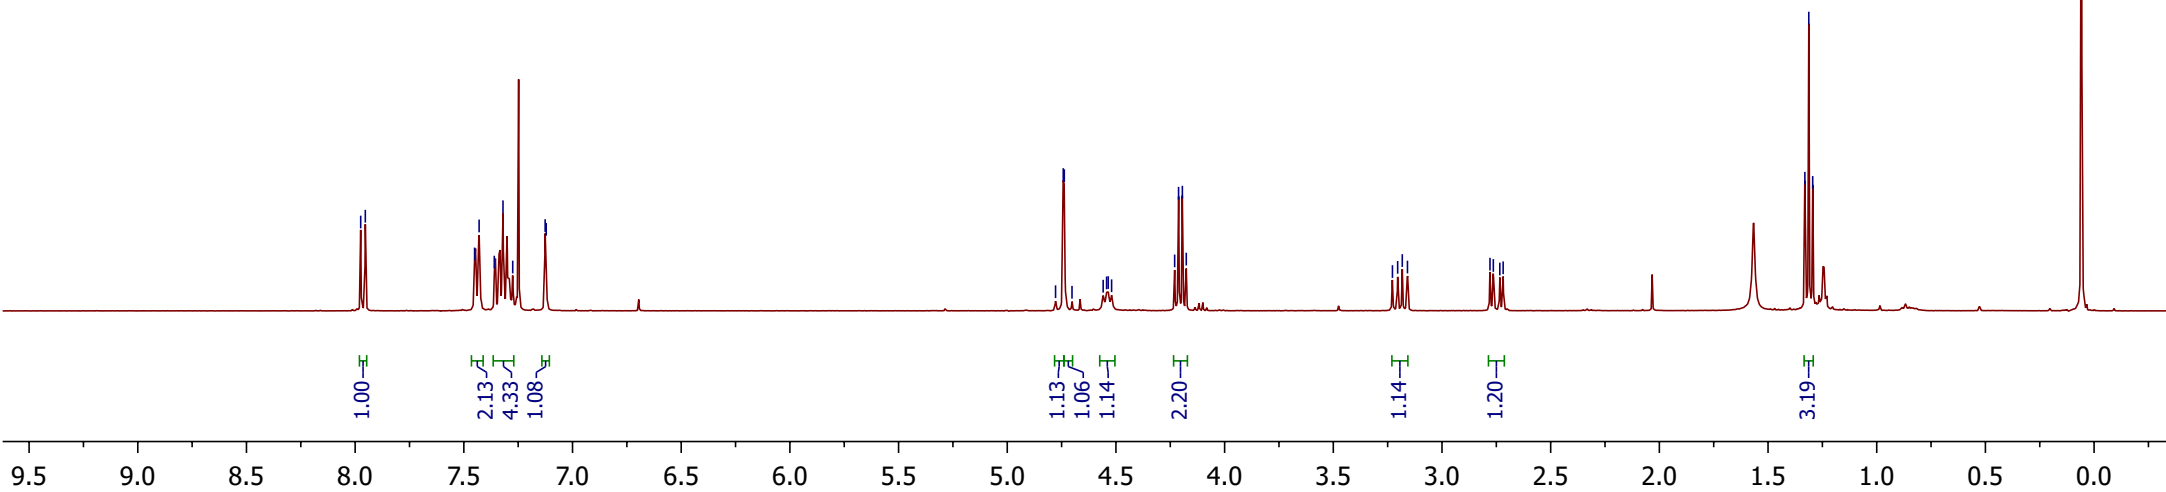

5db

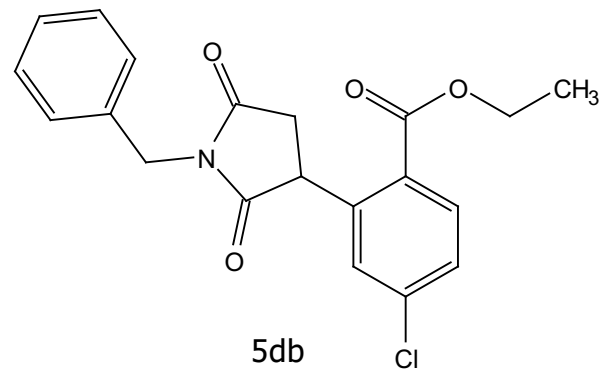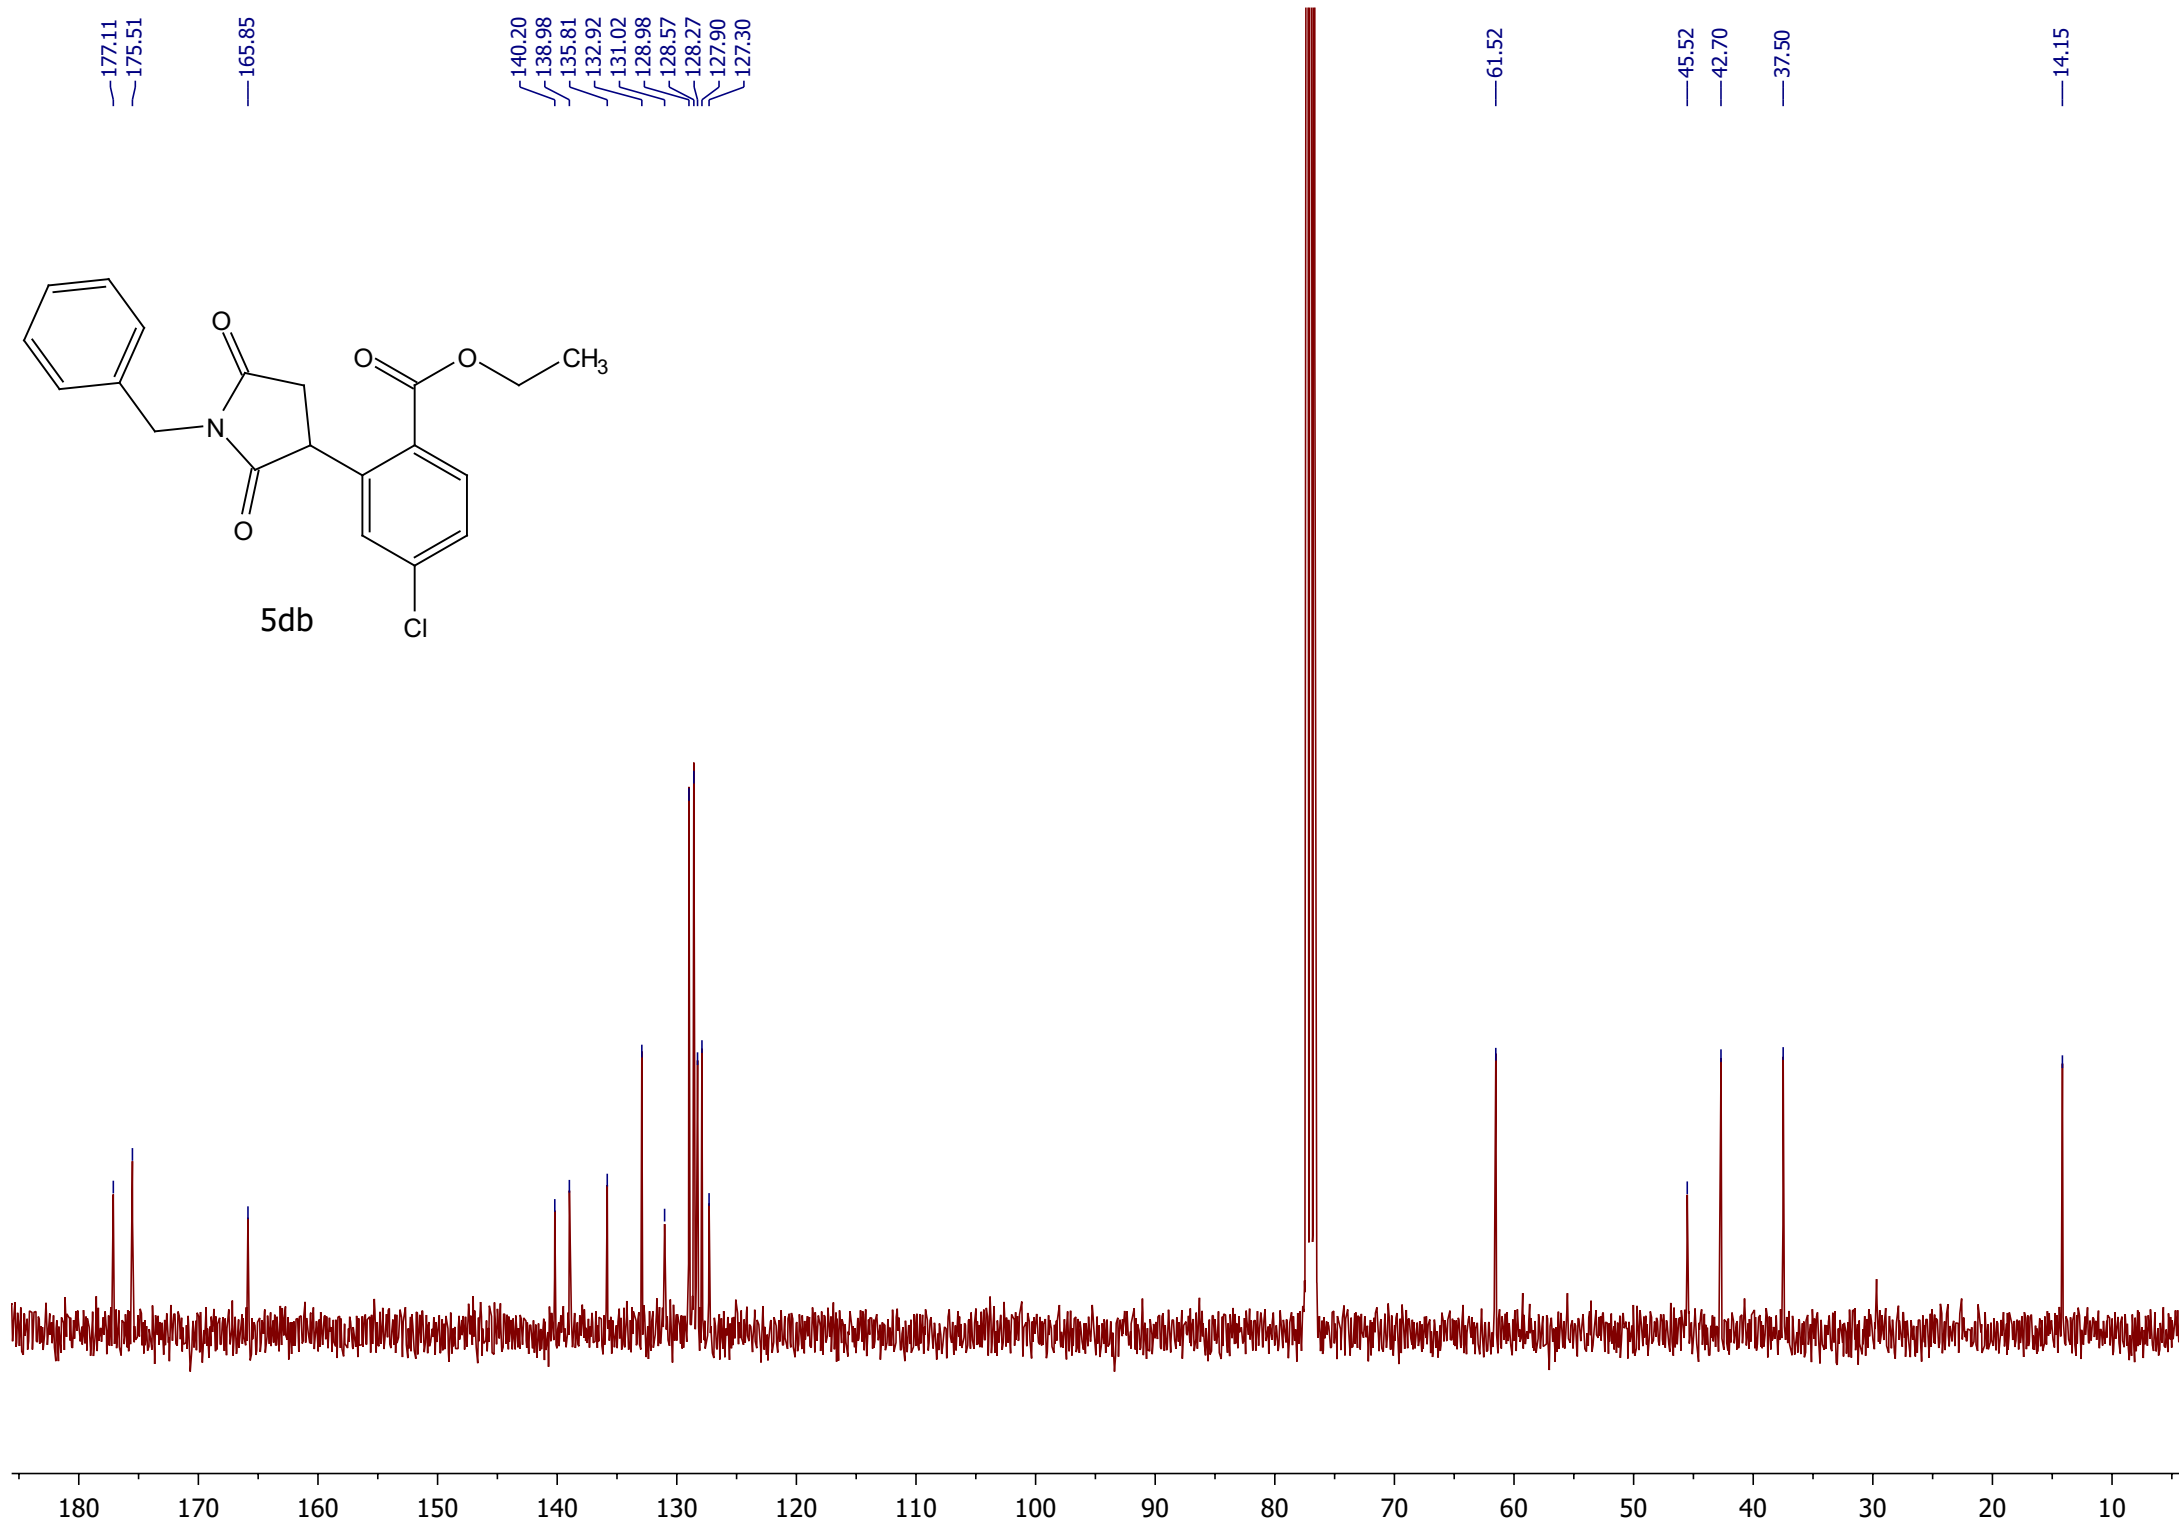

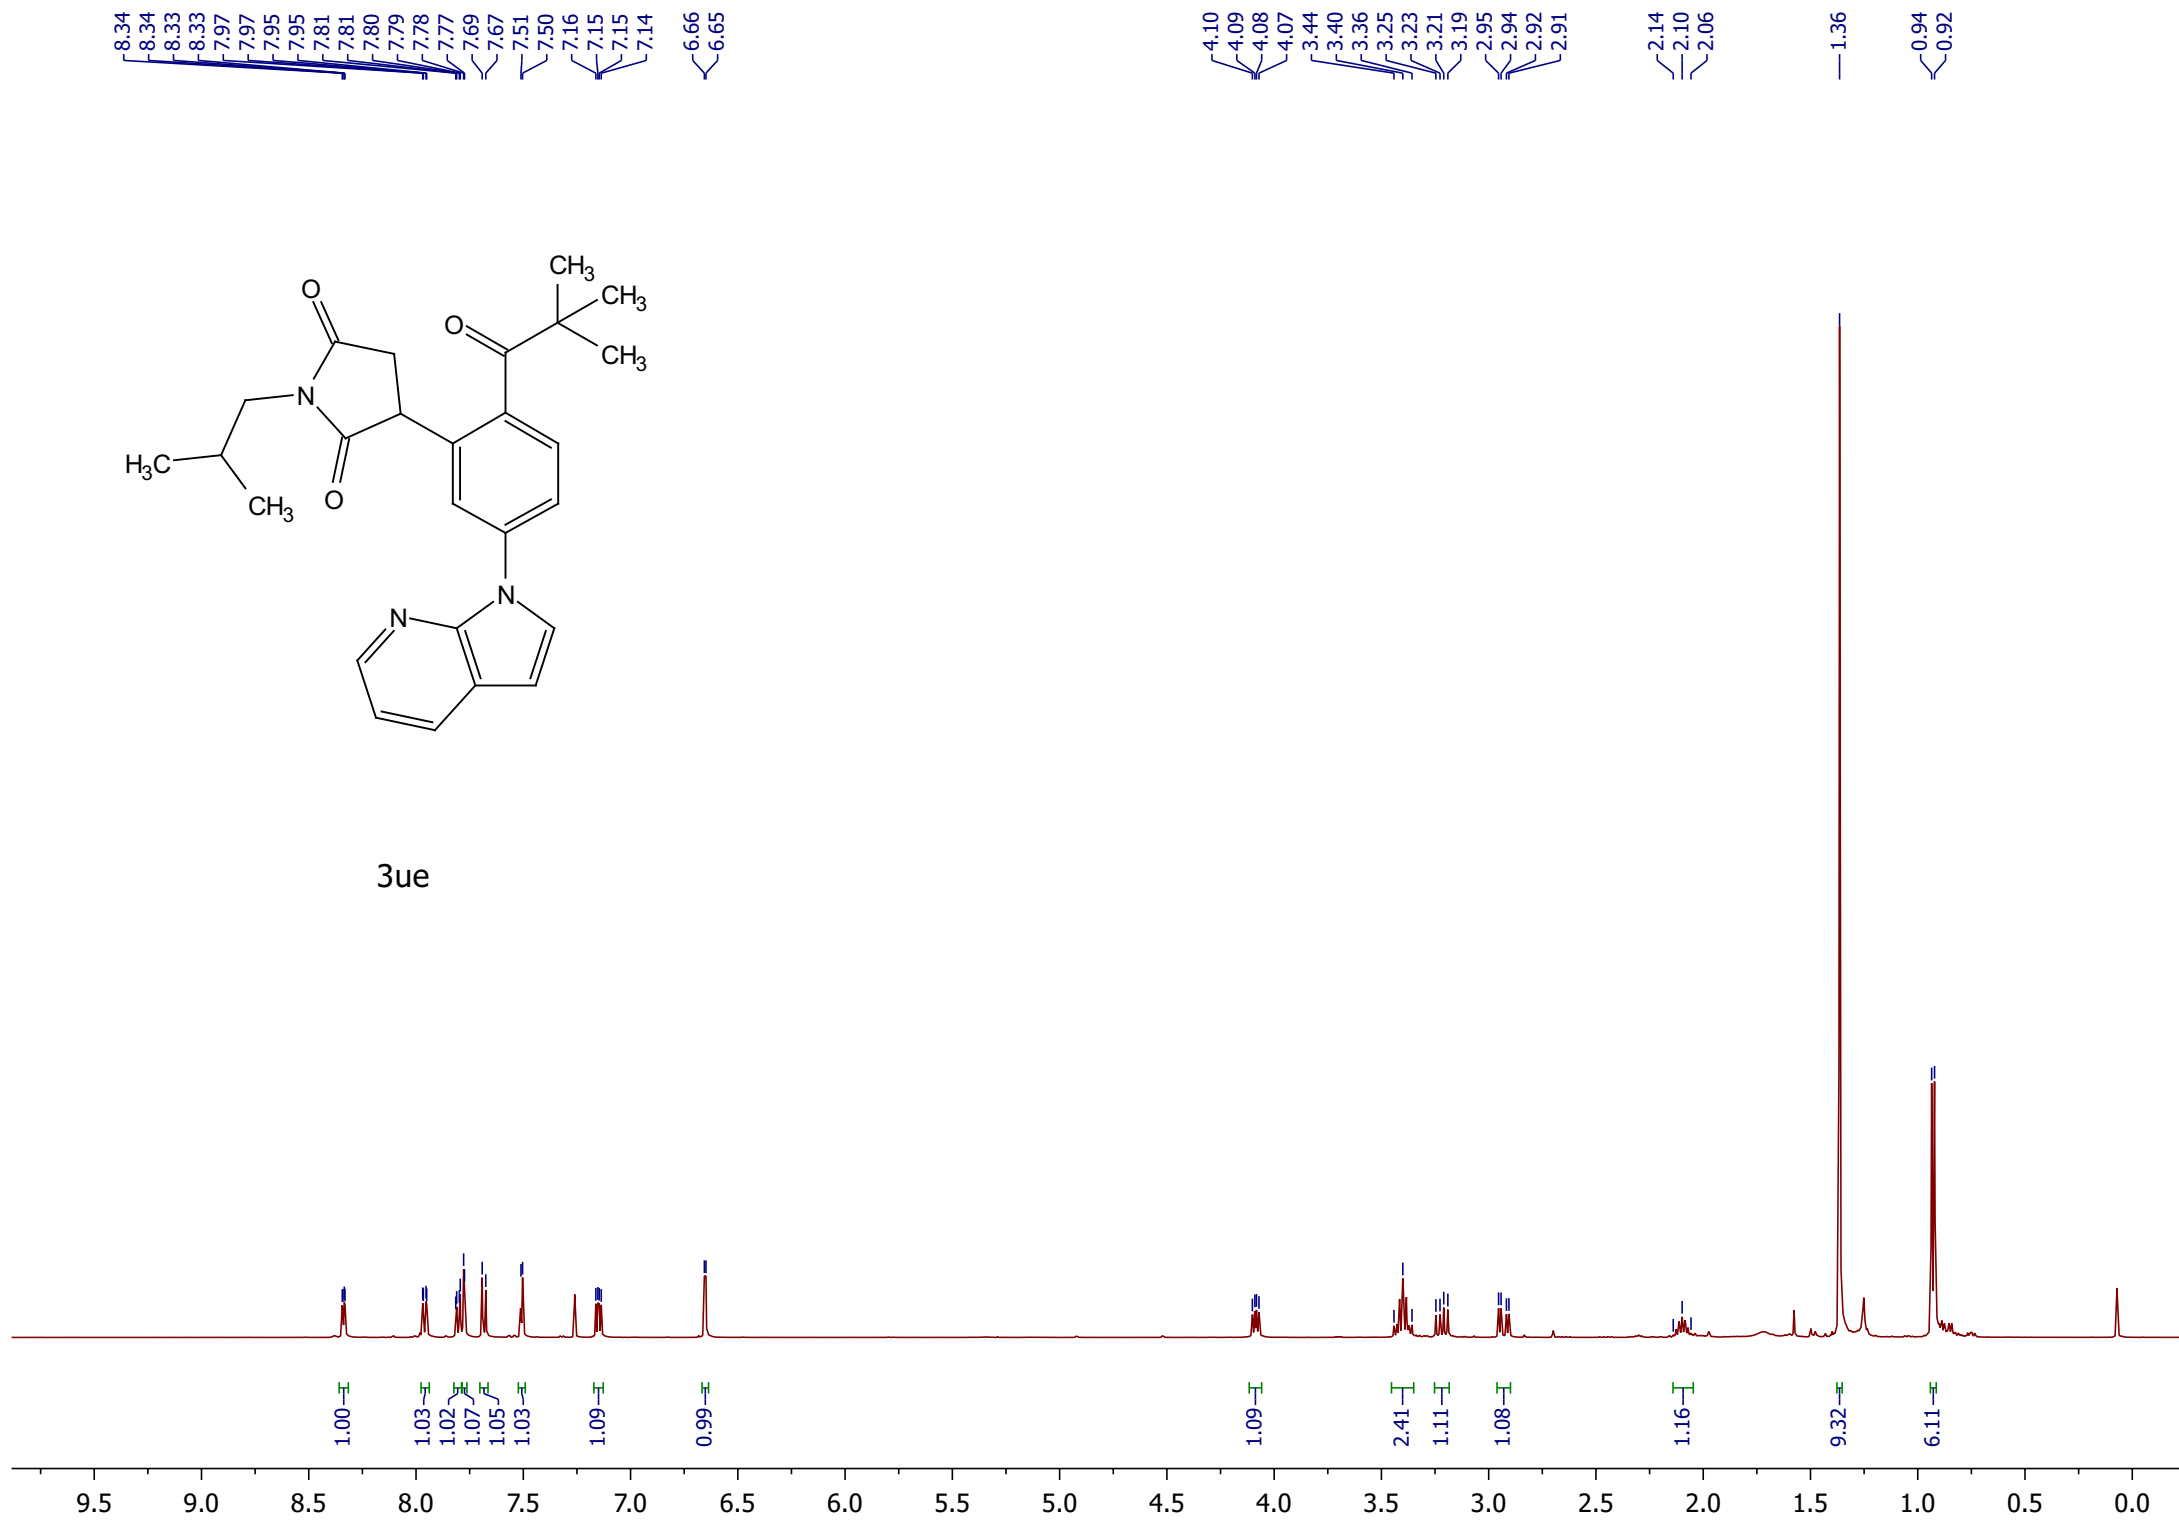

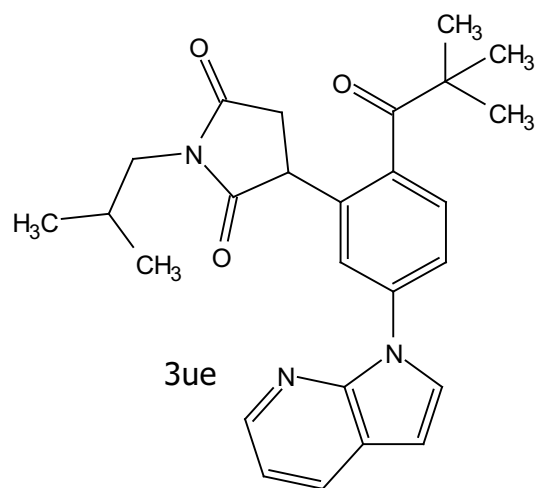

3ue

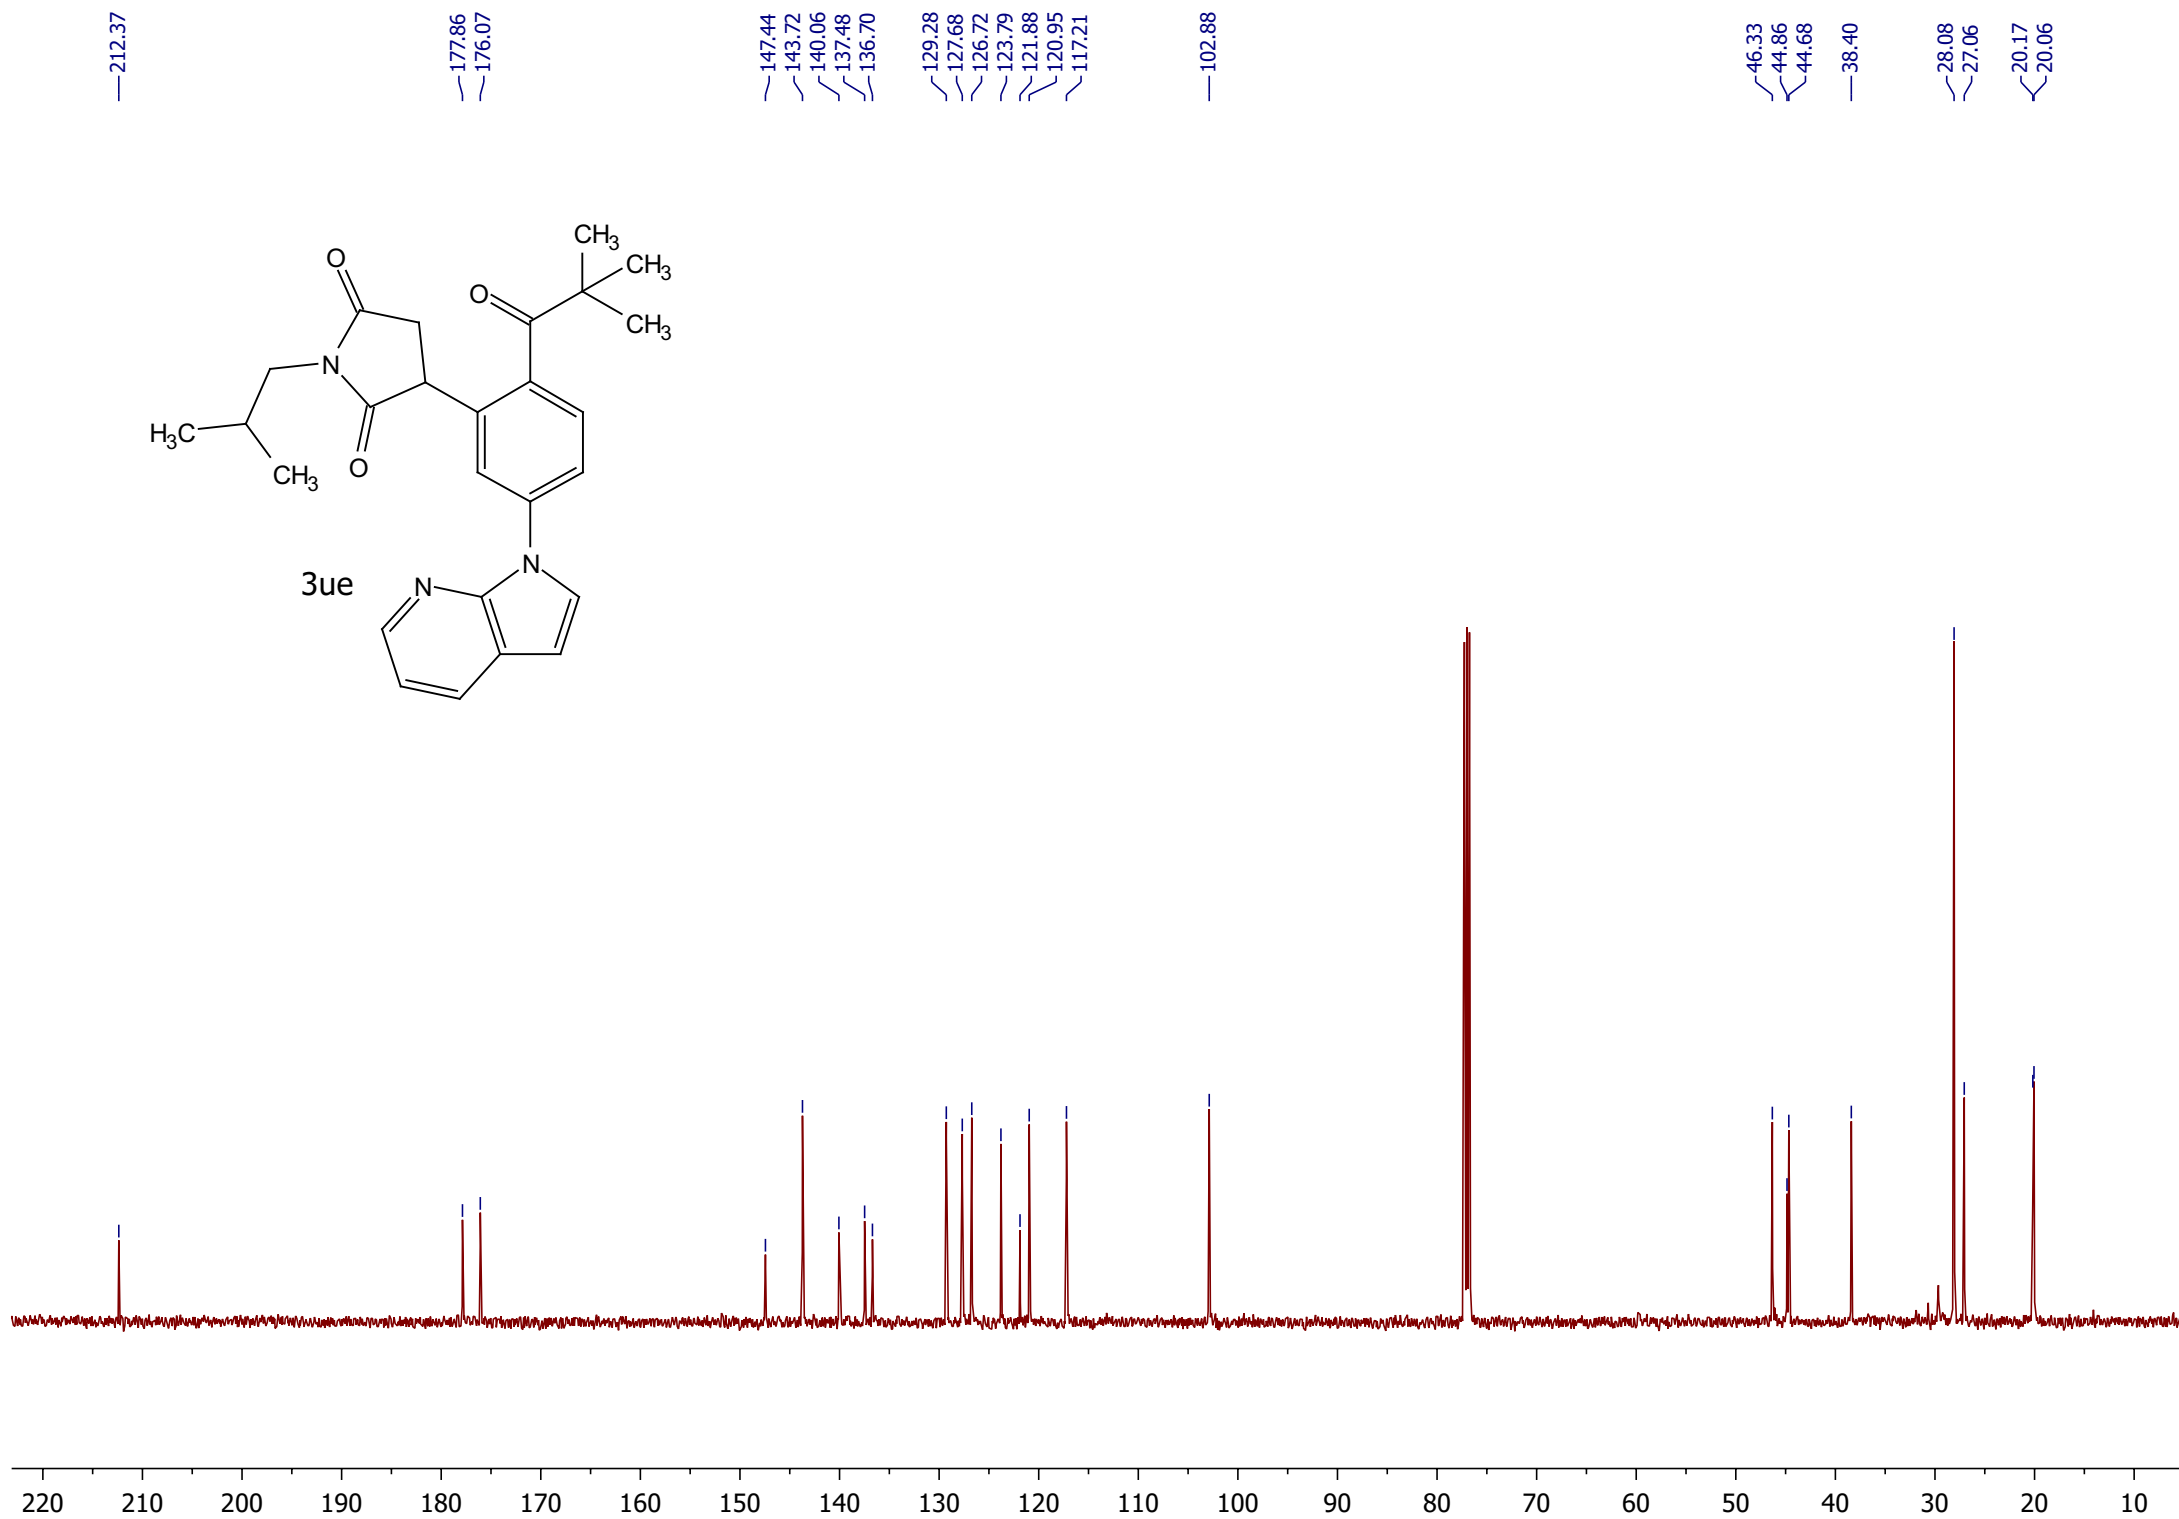

7.72  
7.72  
7.70  
7.67  
7.66  
7.65  
7.42  
7.33  
7.28  
7.02  
7.01  
6.95  
6.94

4.76  
4.76  
4.74  
4.73  
4.71  
4.67  
3.95  
3.93  
3.93  
3.92  
3.91  
3.90  
3.89  
3.88  
3.20  
3.18  
3.16  
3.14  
3.13  
2.81  
2.80  
2.79  
2.78  
2.77  
2.76  
2.76  
2.75

1.30  
1.20

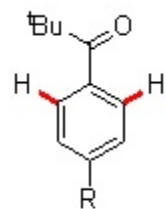

R = <sup>t</sup>Bu/Cl  
(**1c/1e**)

+

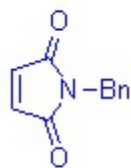

**2b**

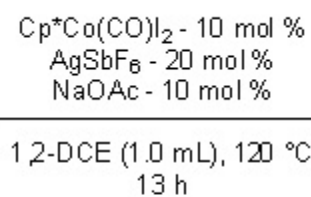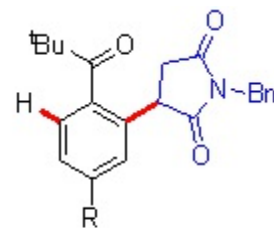

R = <sup>t</sup>Bu/Cl (**3cb/3eb**)  
(<sup>t</sup>Bu:Cl = 1.78:1)

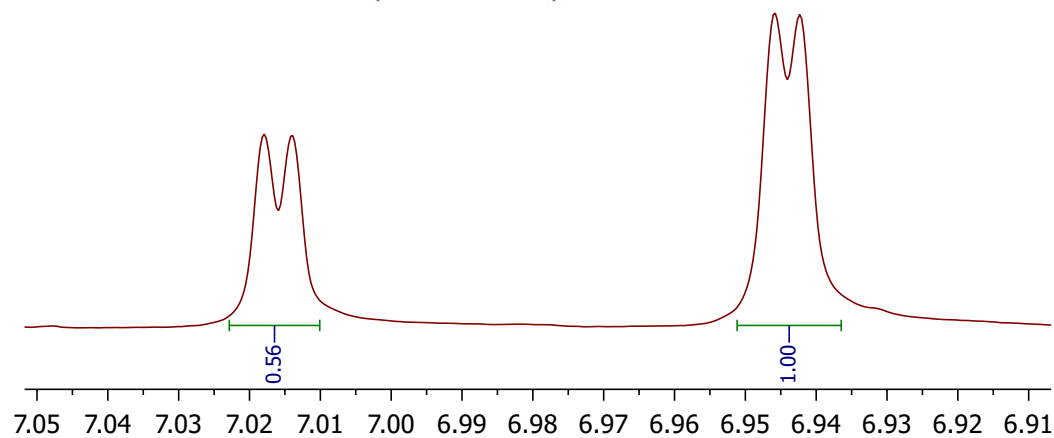

0.56  
1.00

8.5 8.0 7.5 7.0 6.5 6.0 5.5 5.0 4.5 4.0 3.5 3.0 2.5 2.0 1.5 1.0 0.5

7.70  
7.69  
7.67

7.47  
7.46  
7.44  
7.44  
7.41  
7.40  
7.38

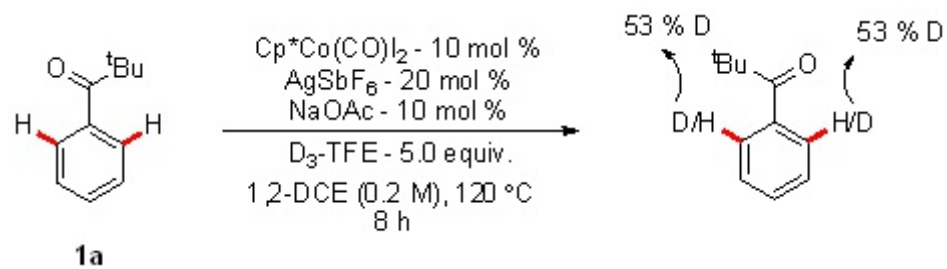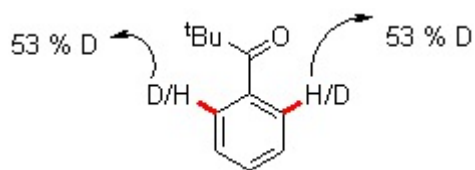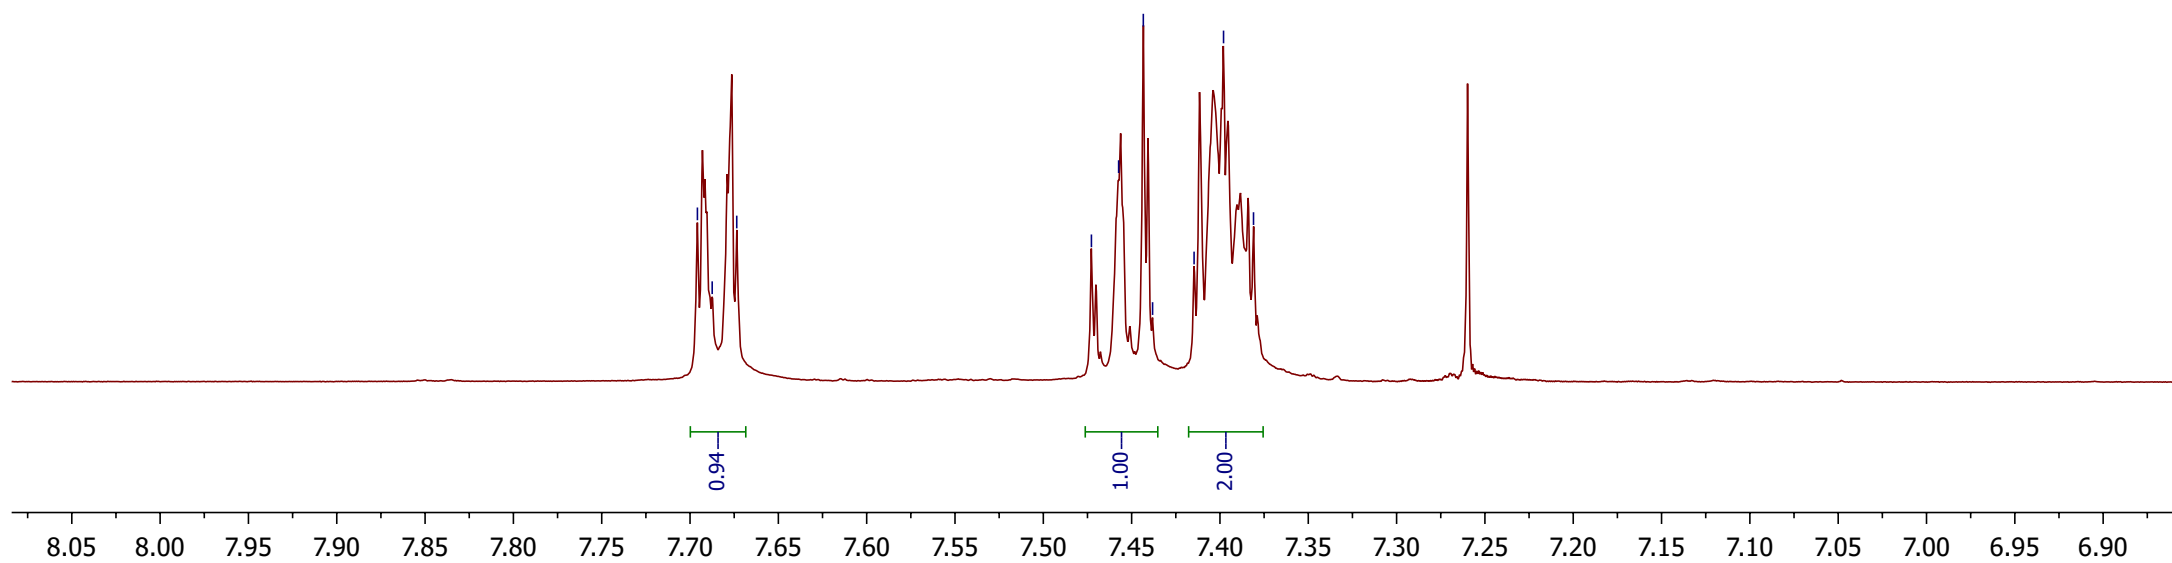

7.59  
7.57  
7.50  
7.44  
7.43  
7.38  
7.34  
7.29  
7.28

4.17  
4.16  
4.14

3.34  
3.32  
3.30  
3.28  
3.04  
3.03  
3.01  
3.00

1.31

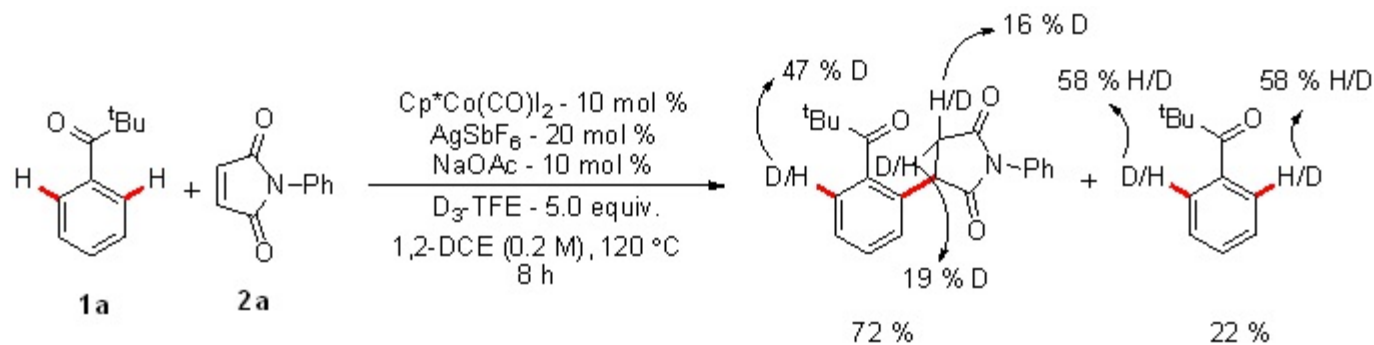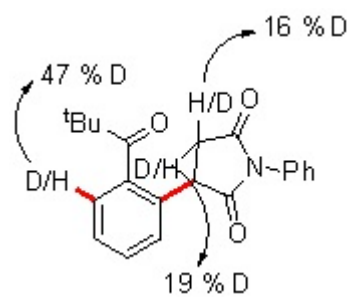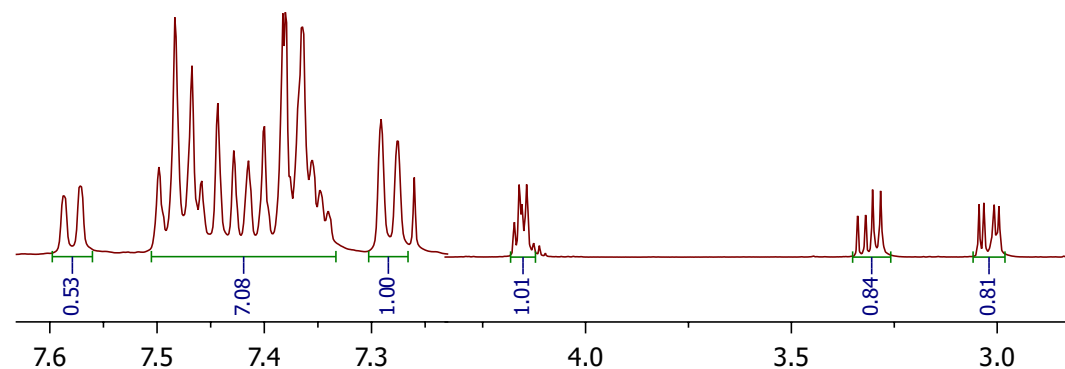

0.53  
7.08  
1.00

1.01

0.84

0.81

9.06

8.0 7.5 7.0 6.5 6.0 5.5 5.0 4.5 4.0 3.5 3.0 2.5 2.0 1.5 1.0 0.5

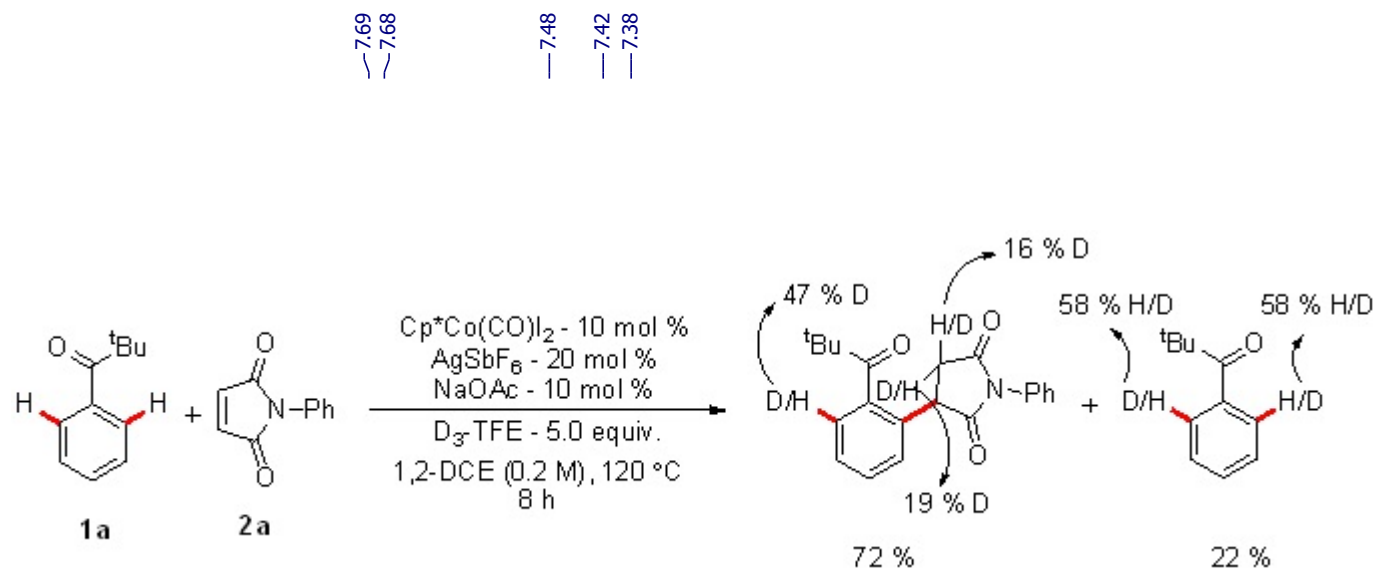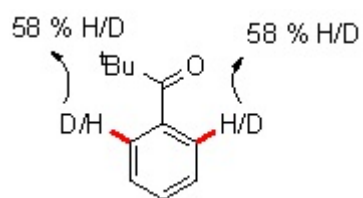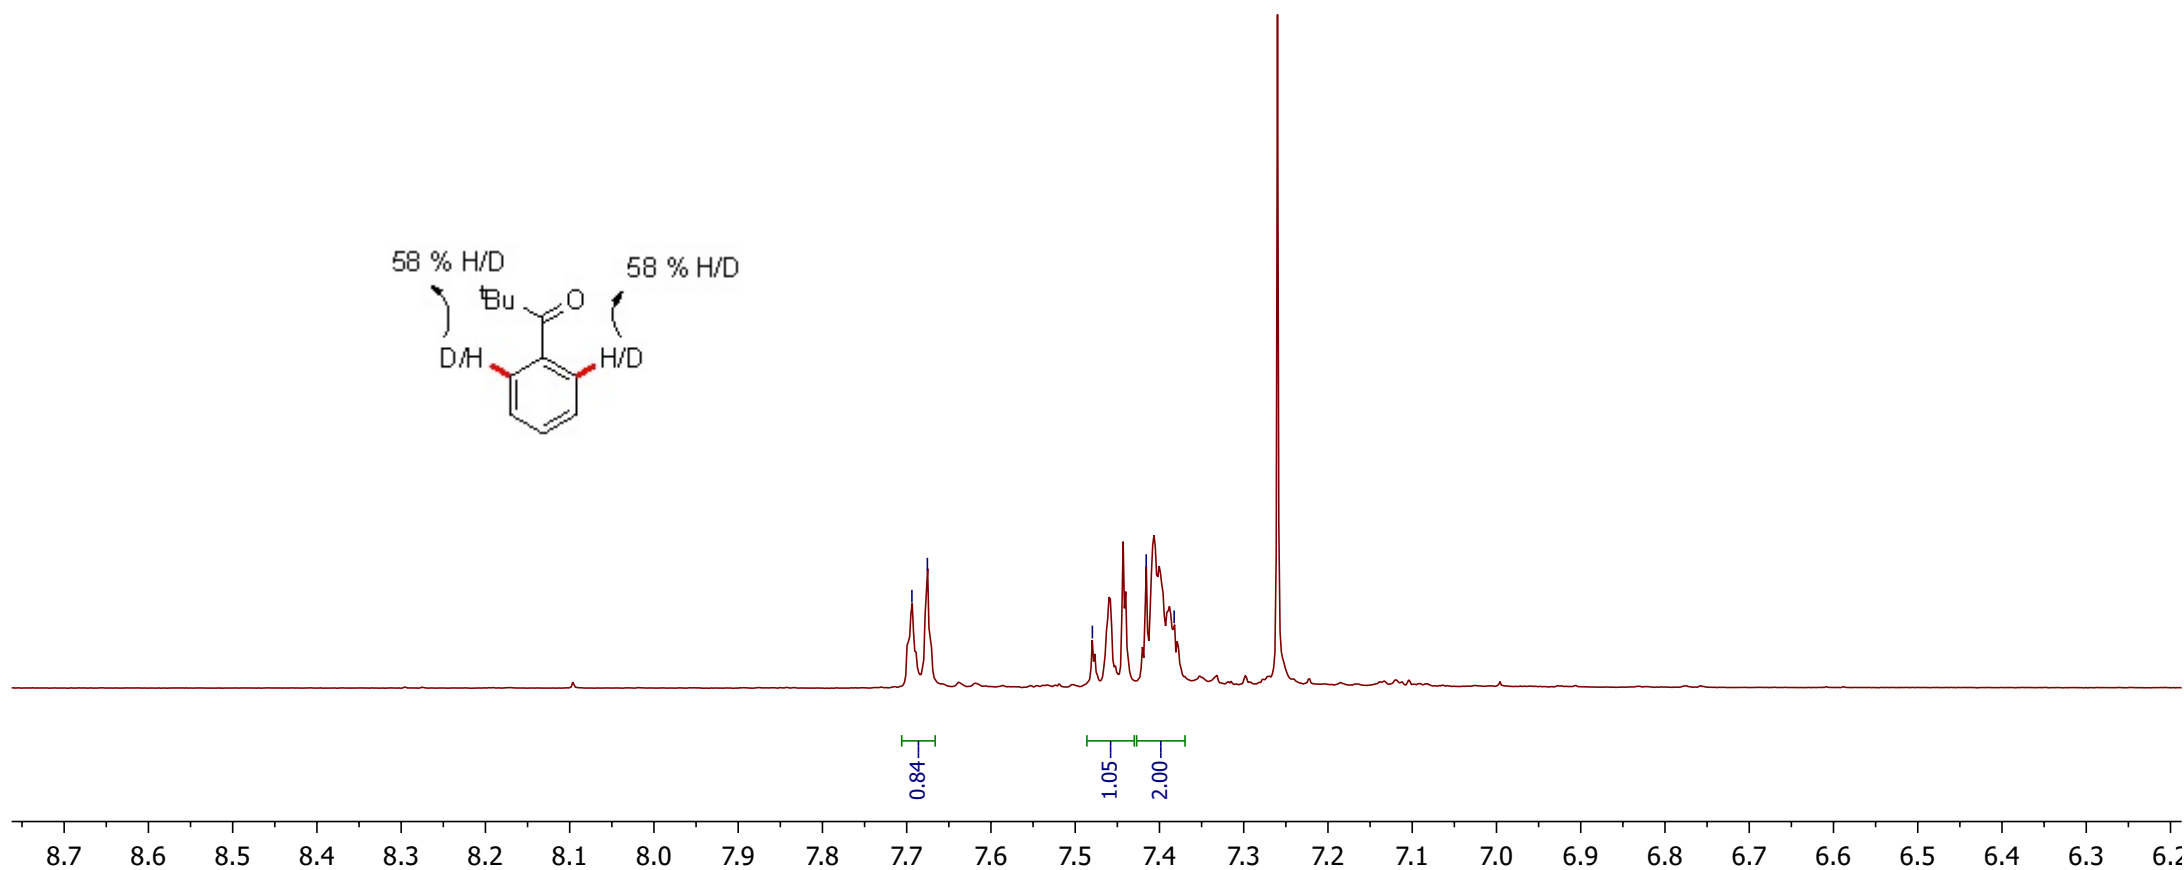

Supplement: Supplementary file 1 [file 11357933]
